# Supplementary material for: High glutamine suppresses osteogenesis through mTORC1-mediated inhibition of the mTORC2/AKT-473/RUNX2 axis
Source: PubMed Central journal article supplement (PMC9174279; doi:10.1038/s41420-022-01077-3), 2022-06-07

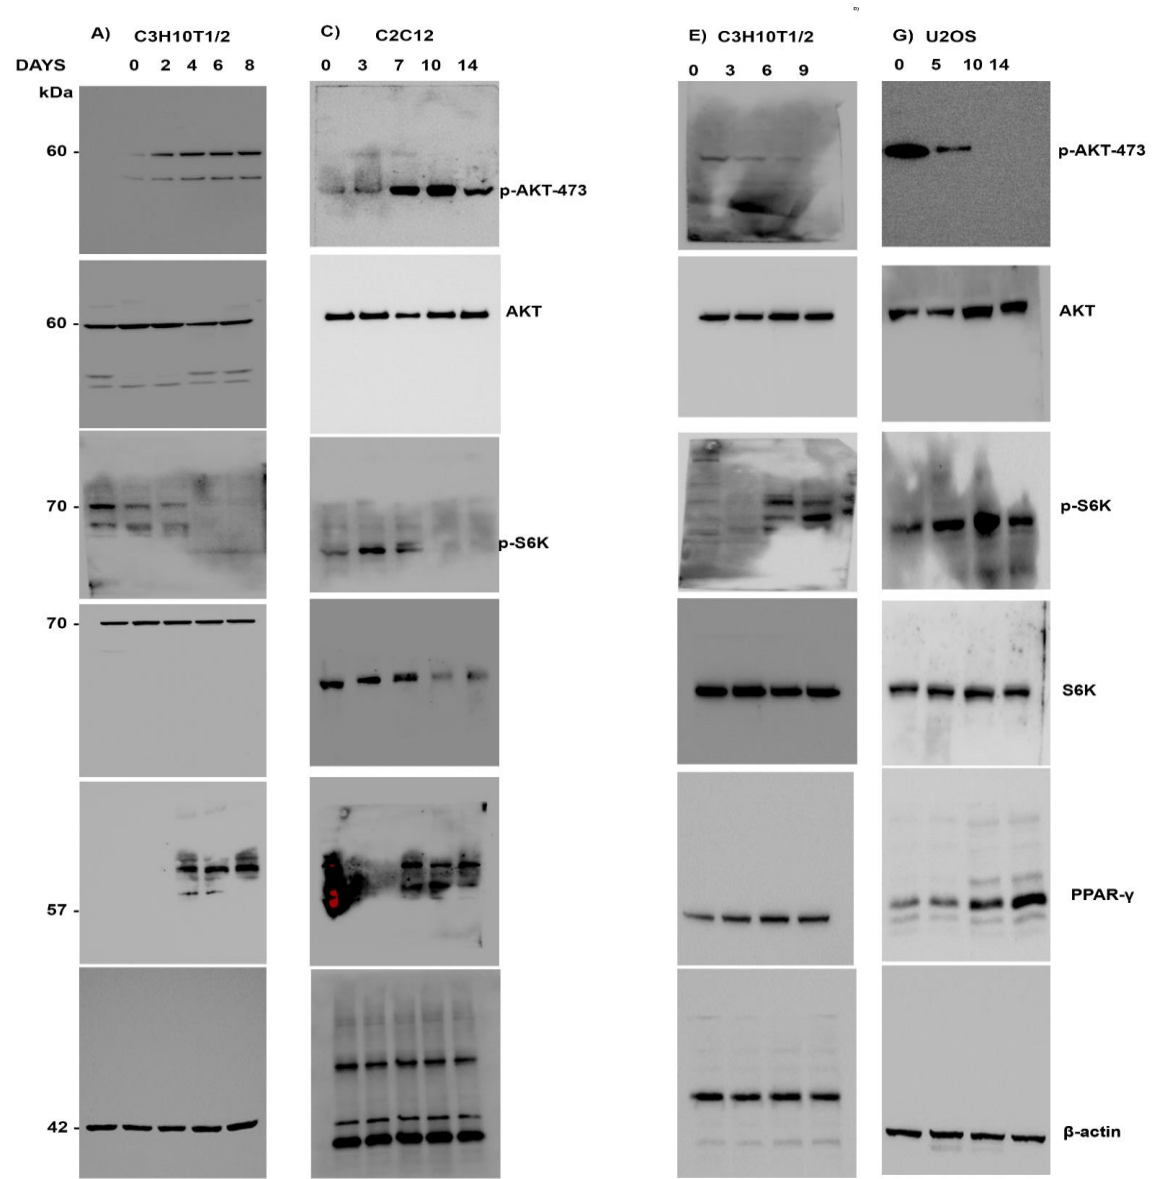

Figure 1

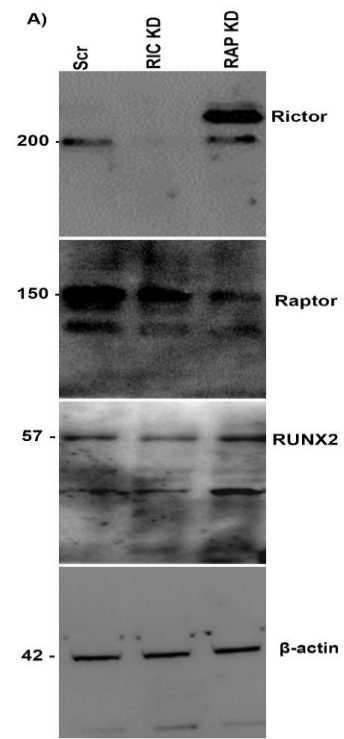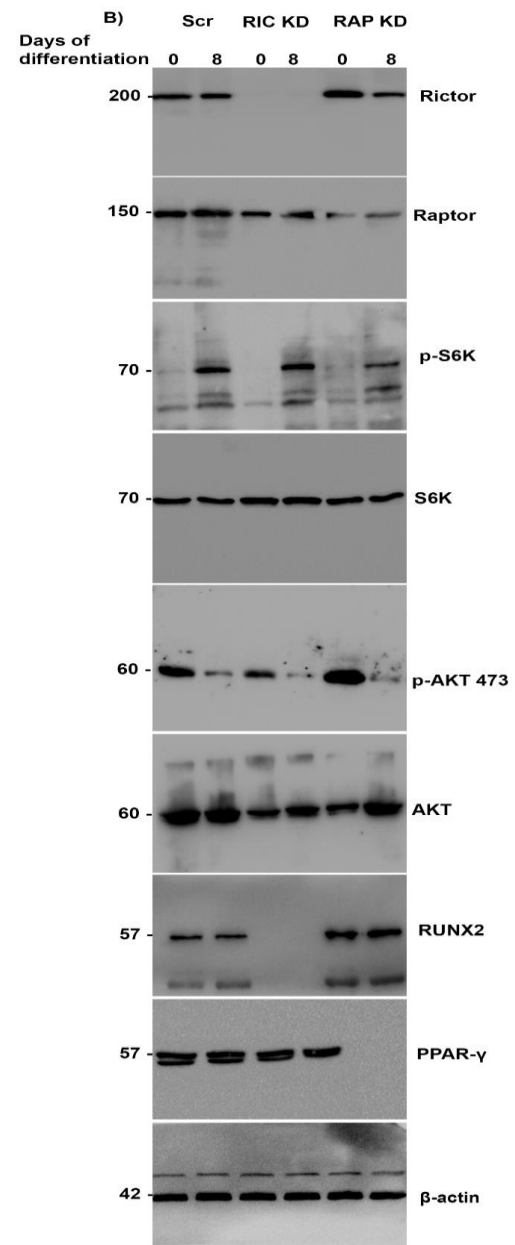

Figure 2

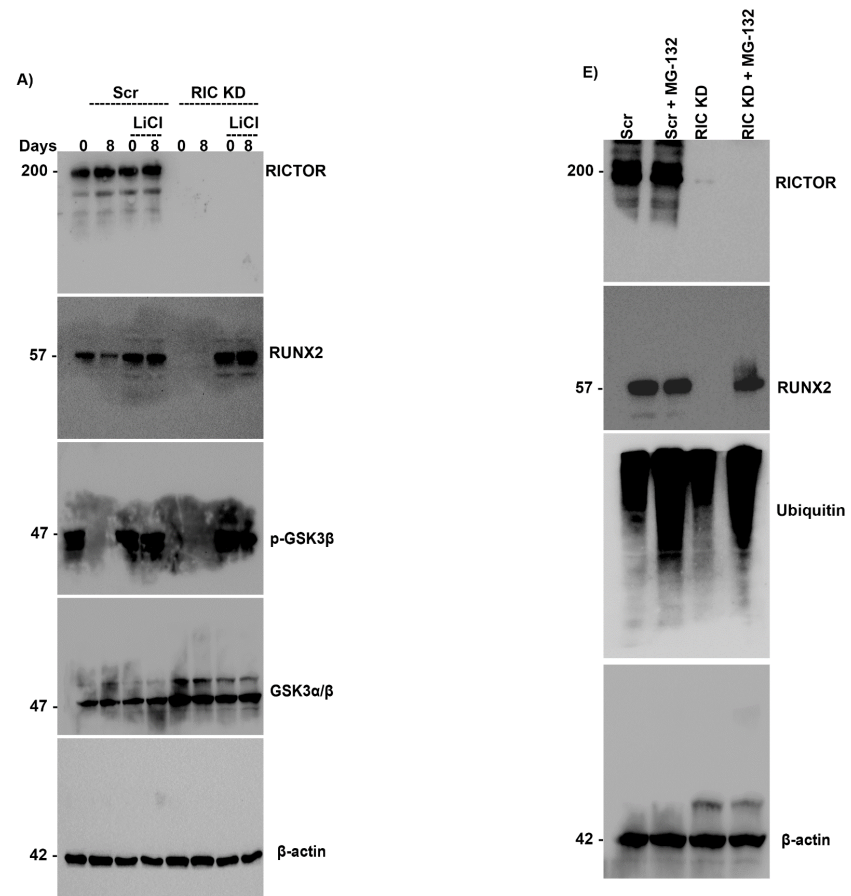

Figure 3

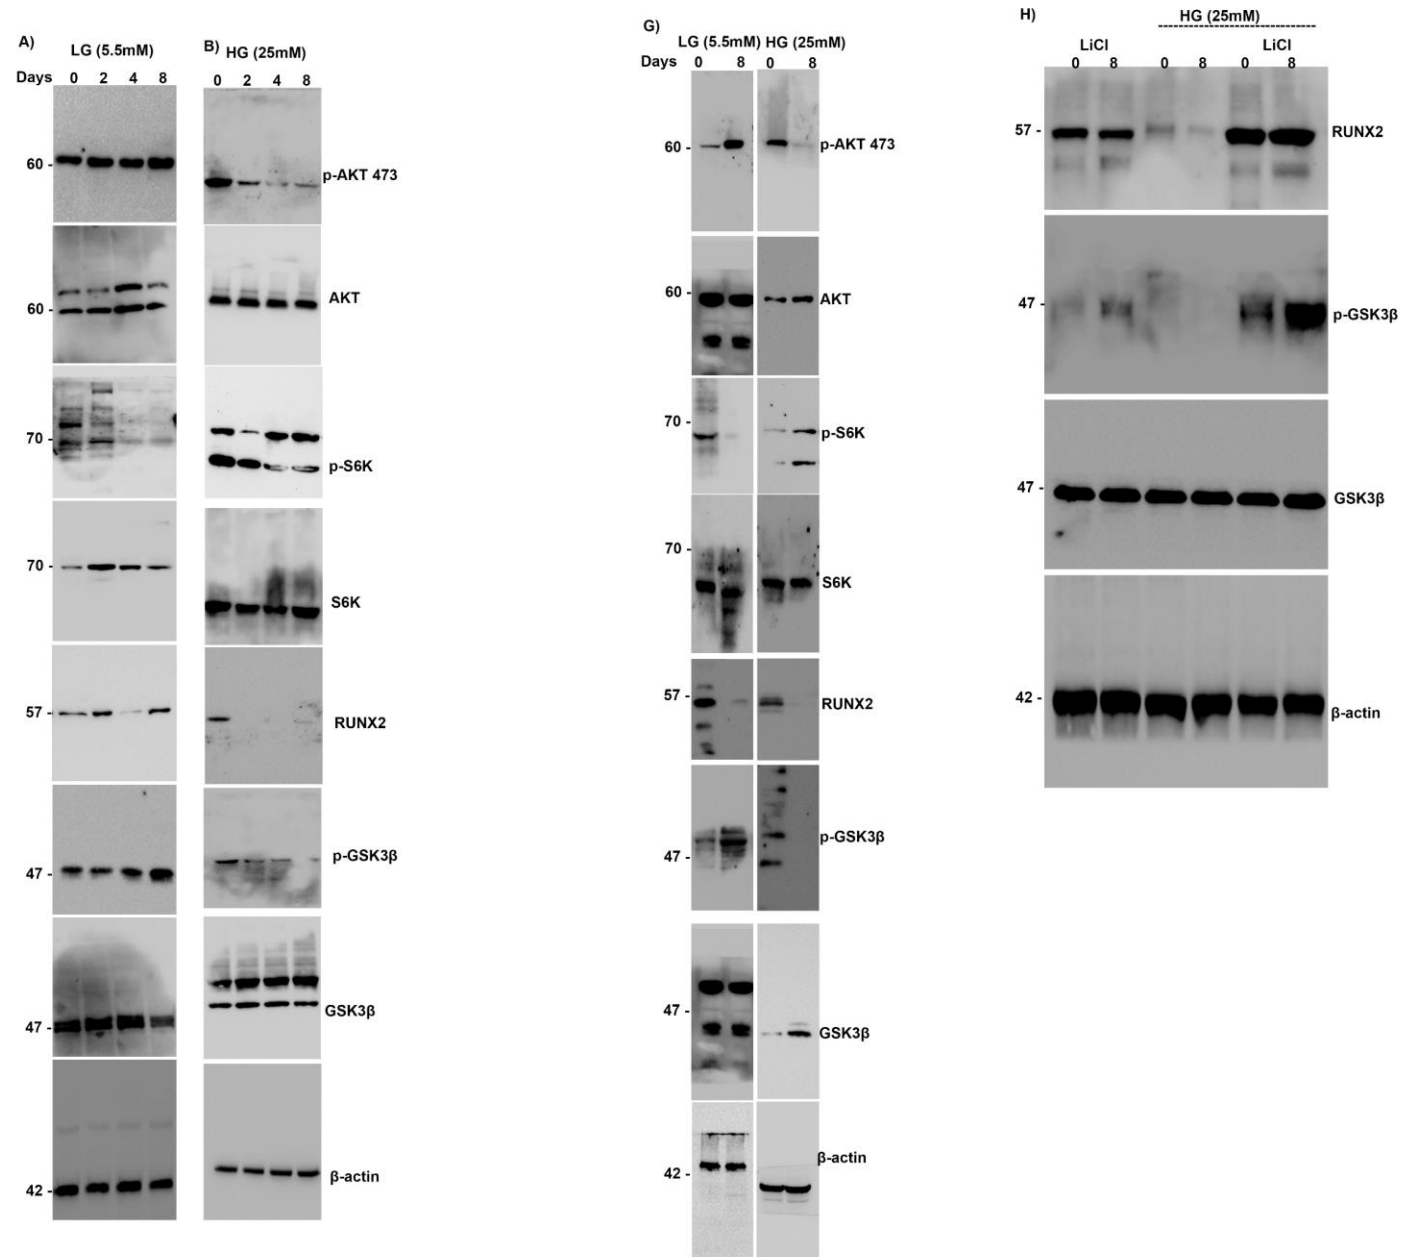

Figure 4

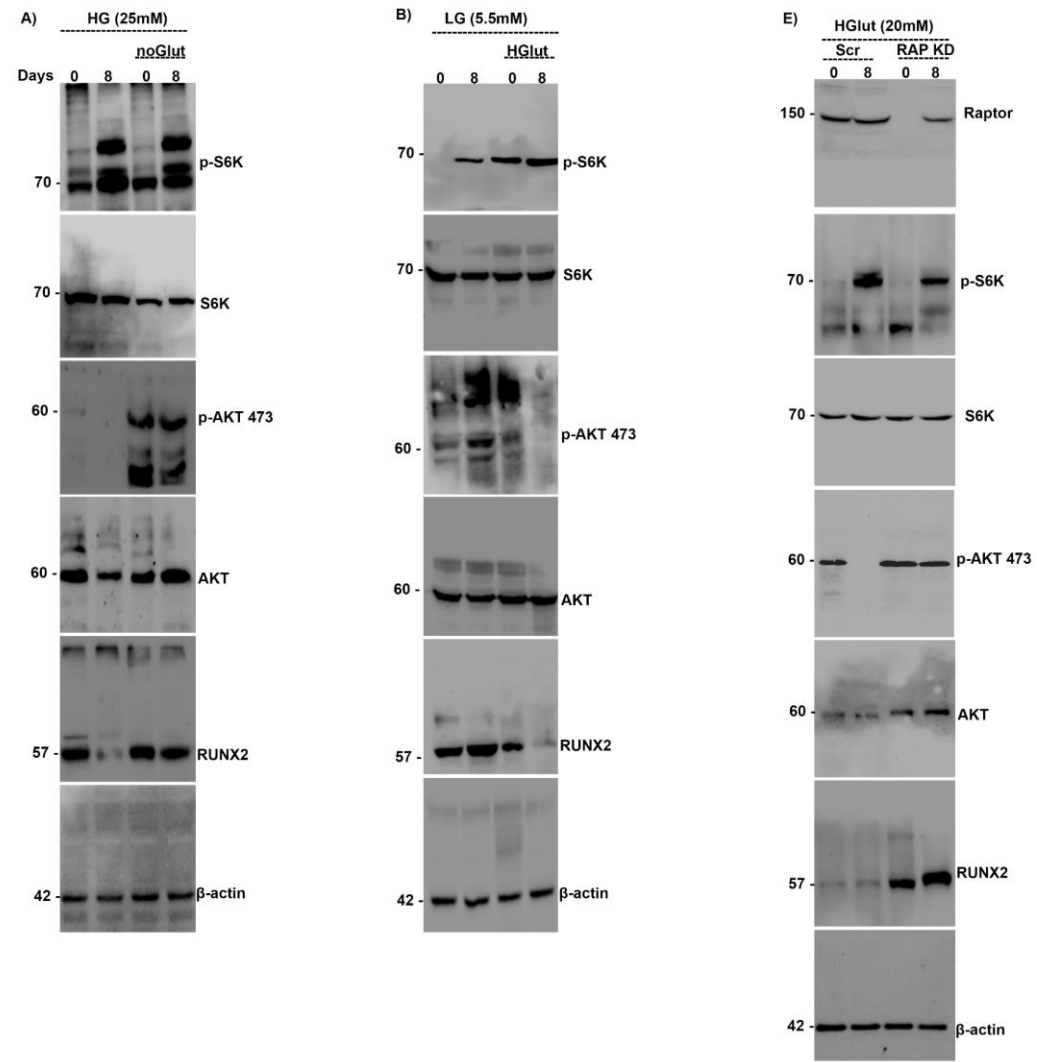

figure 5

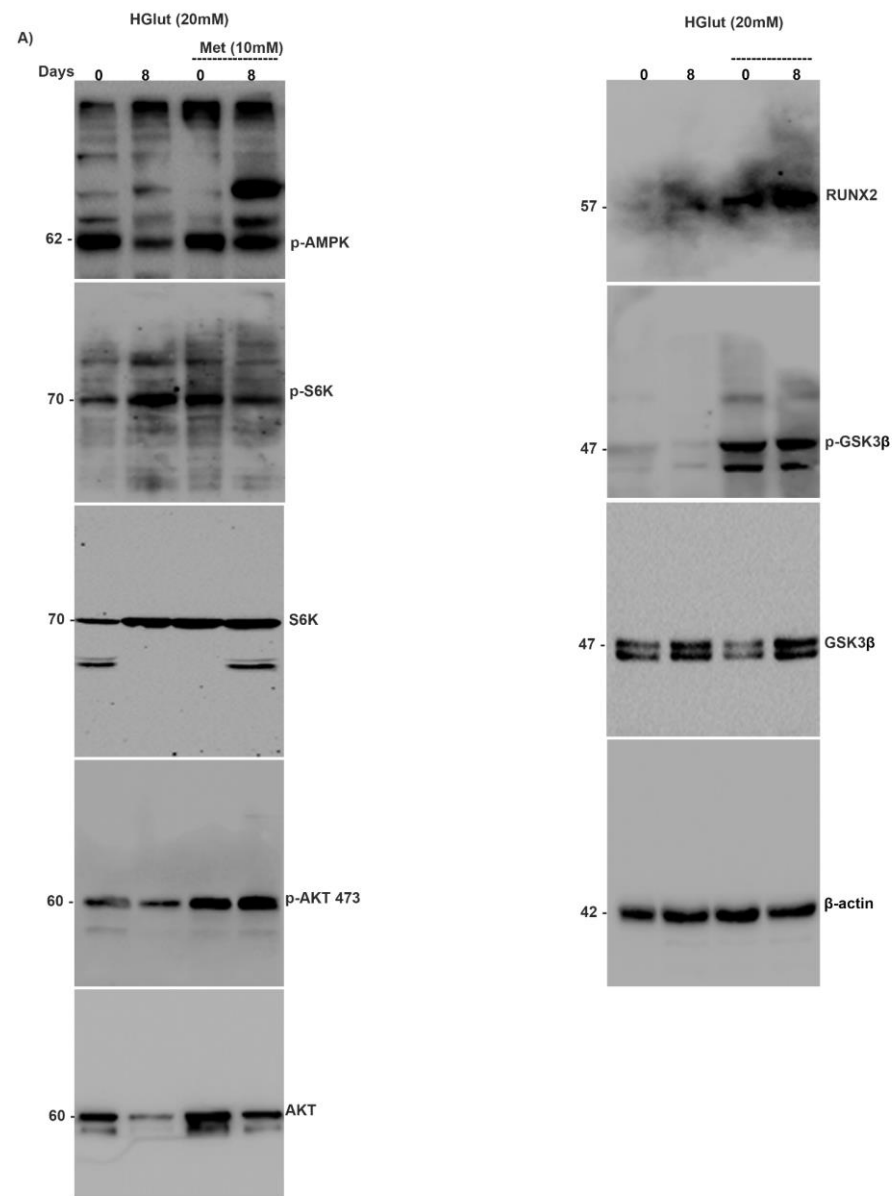

Figure 6

**Fig.2 C)**

**D-0**

**AM + Scr**

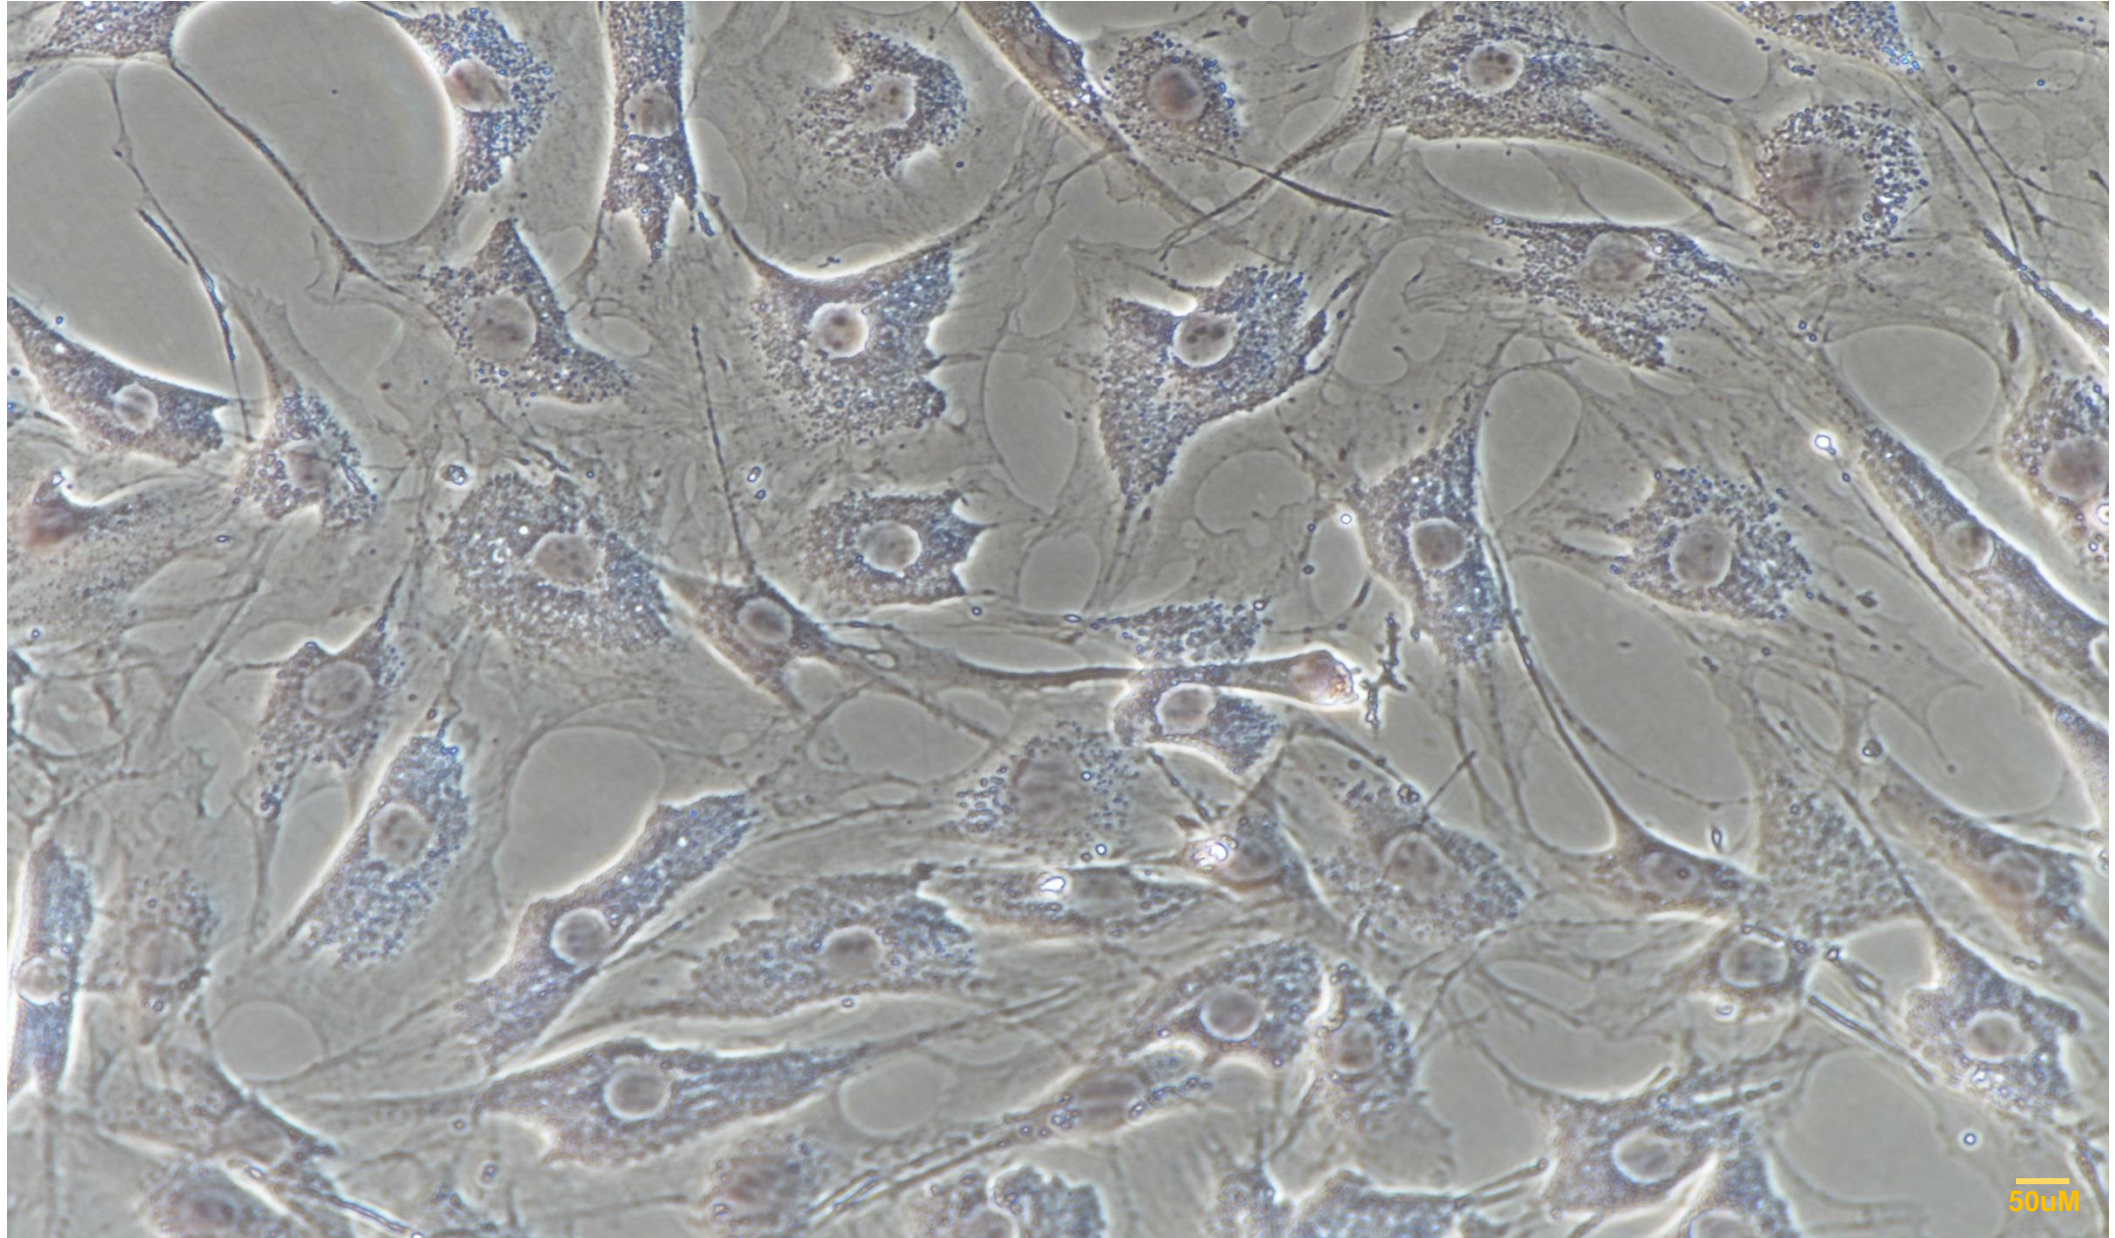

D-8 AM + Scr

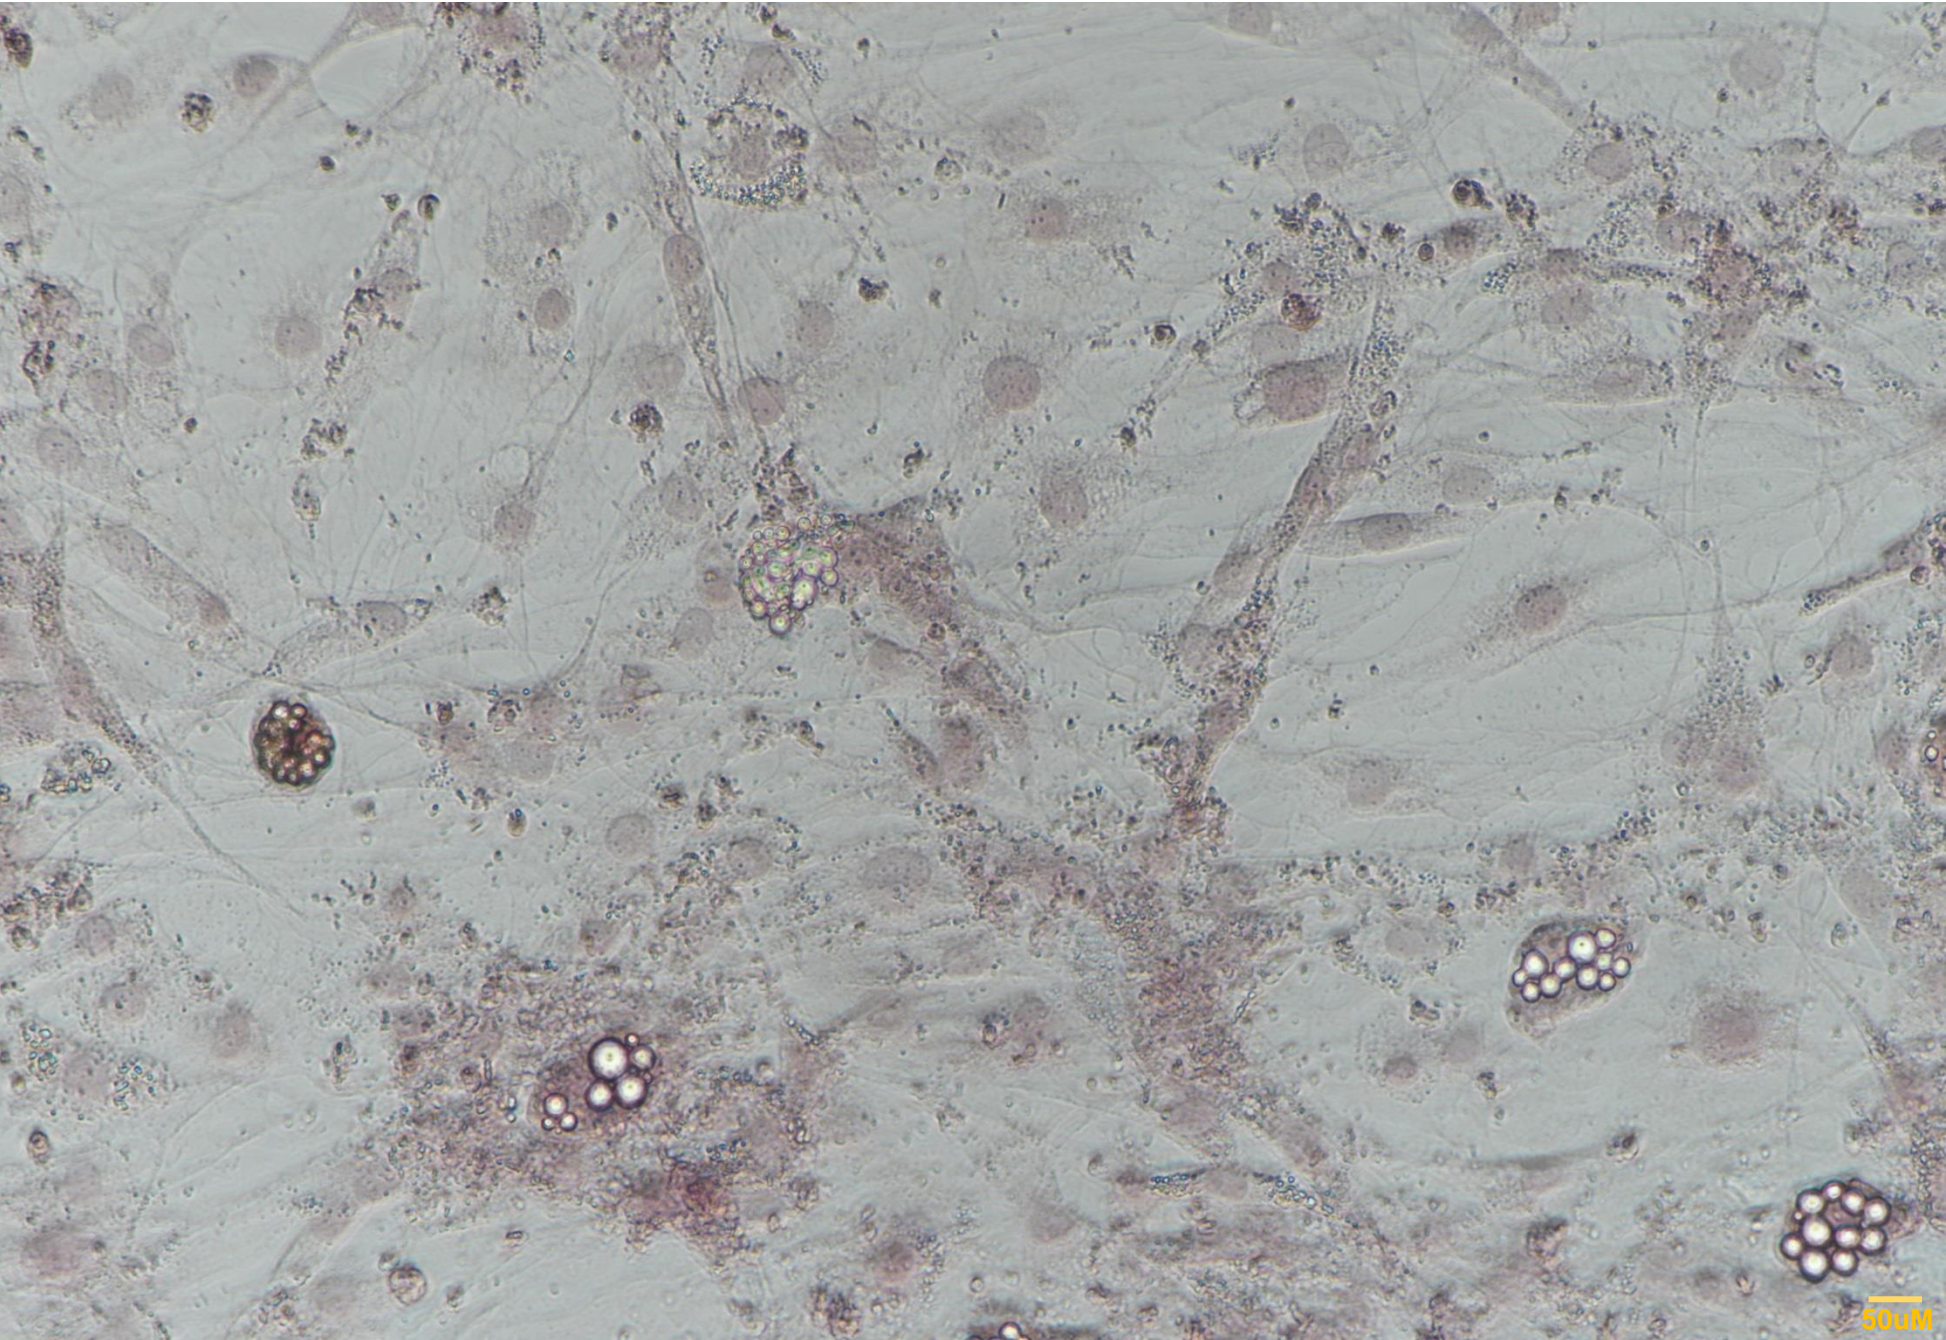



D-0 AM + RIC KD

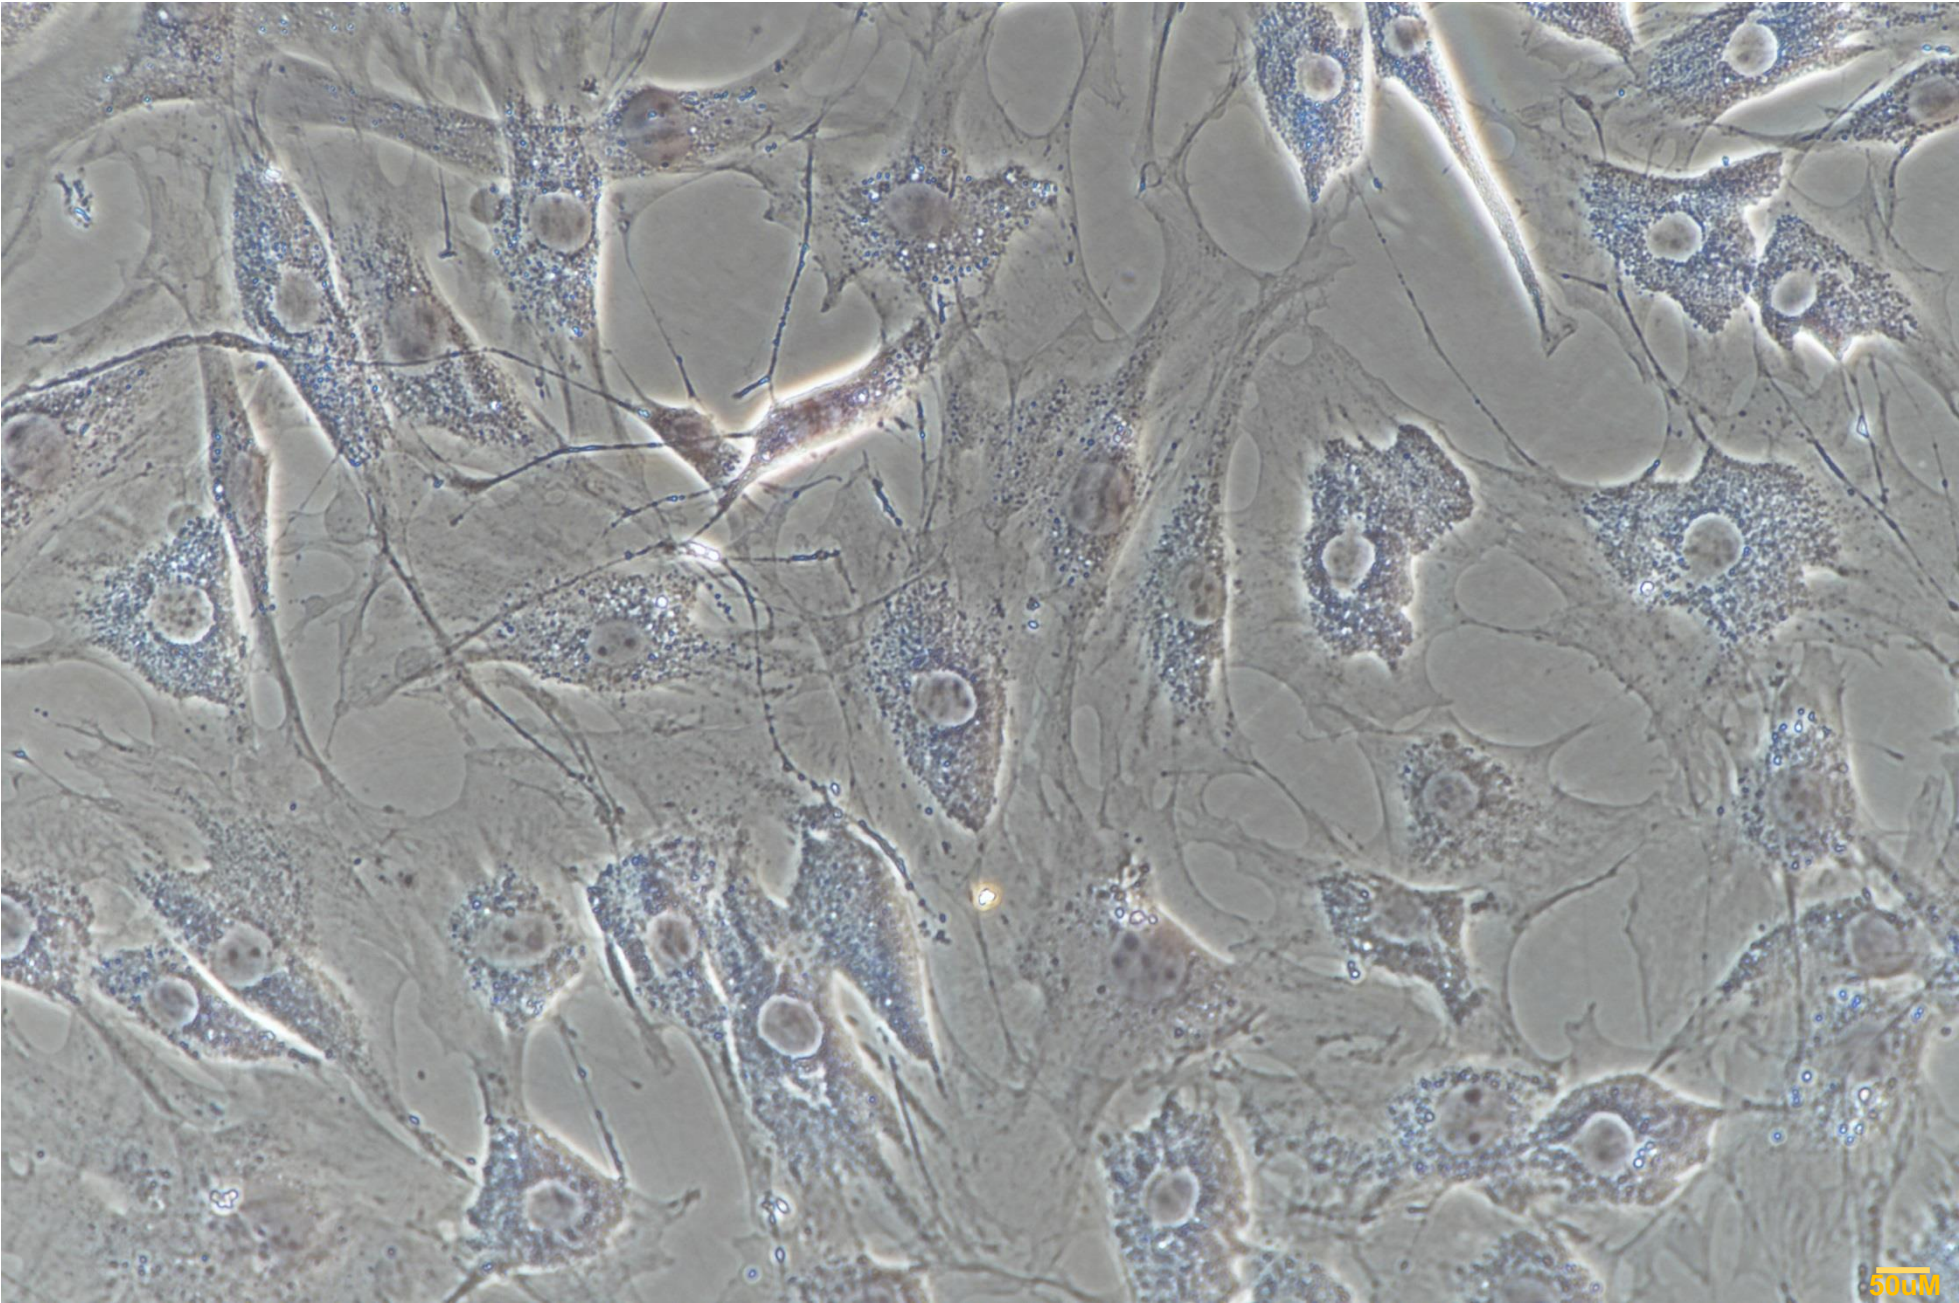

D-8 AM + RIC KD

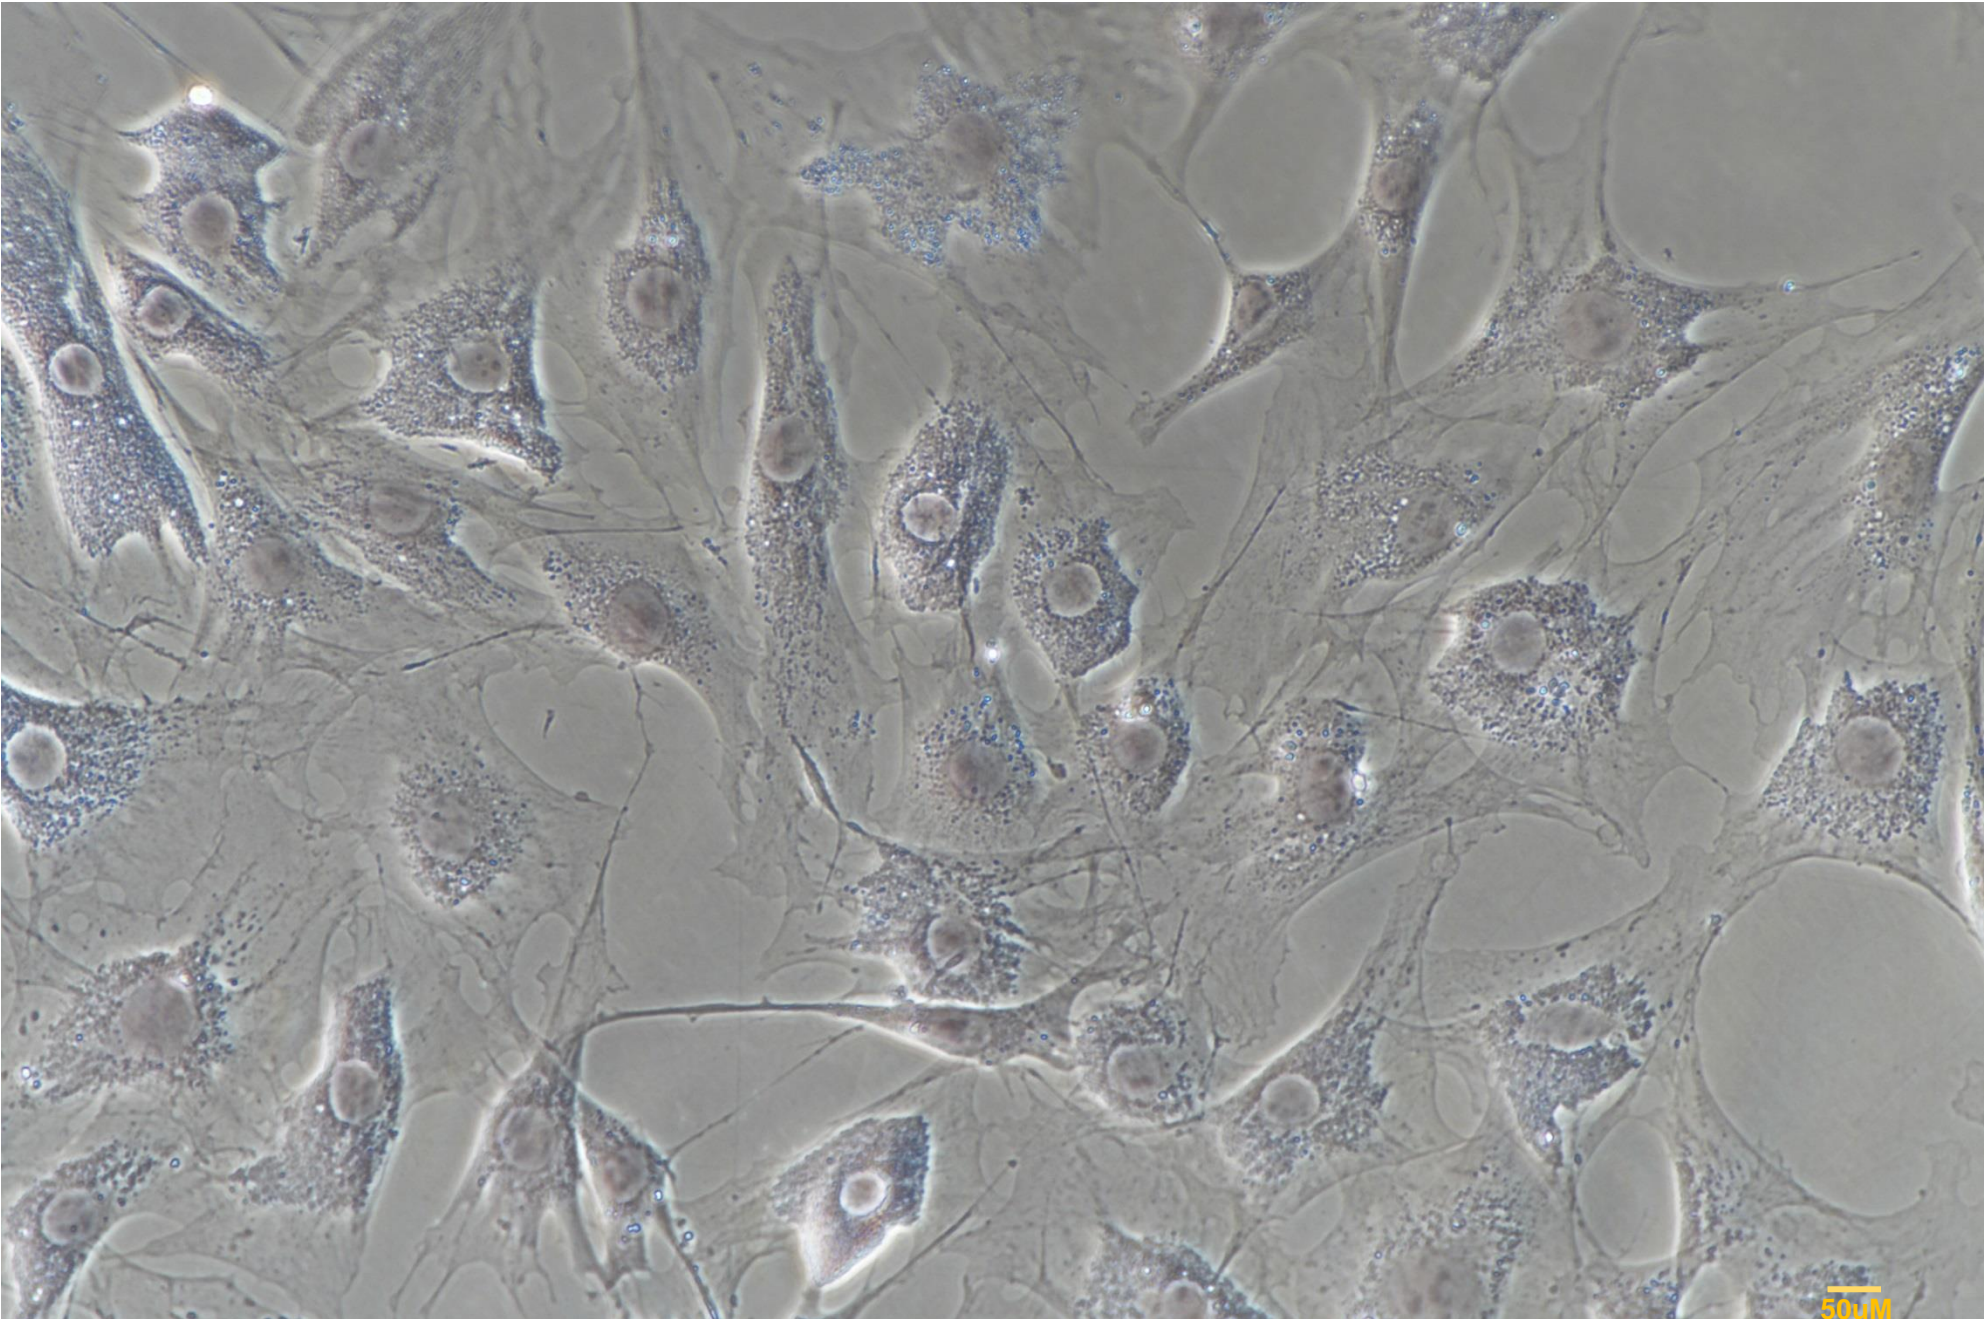

D-0

AM + RAP KD

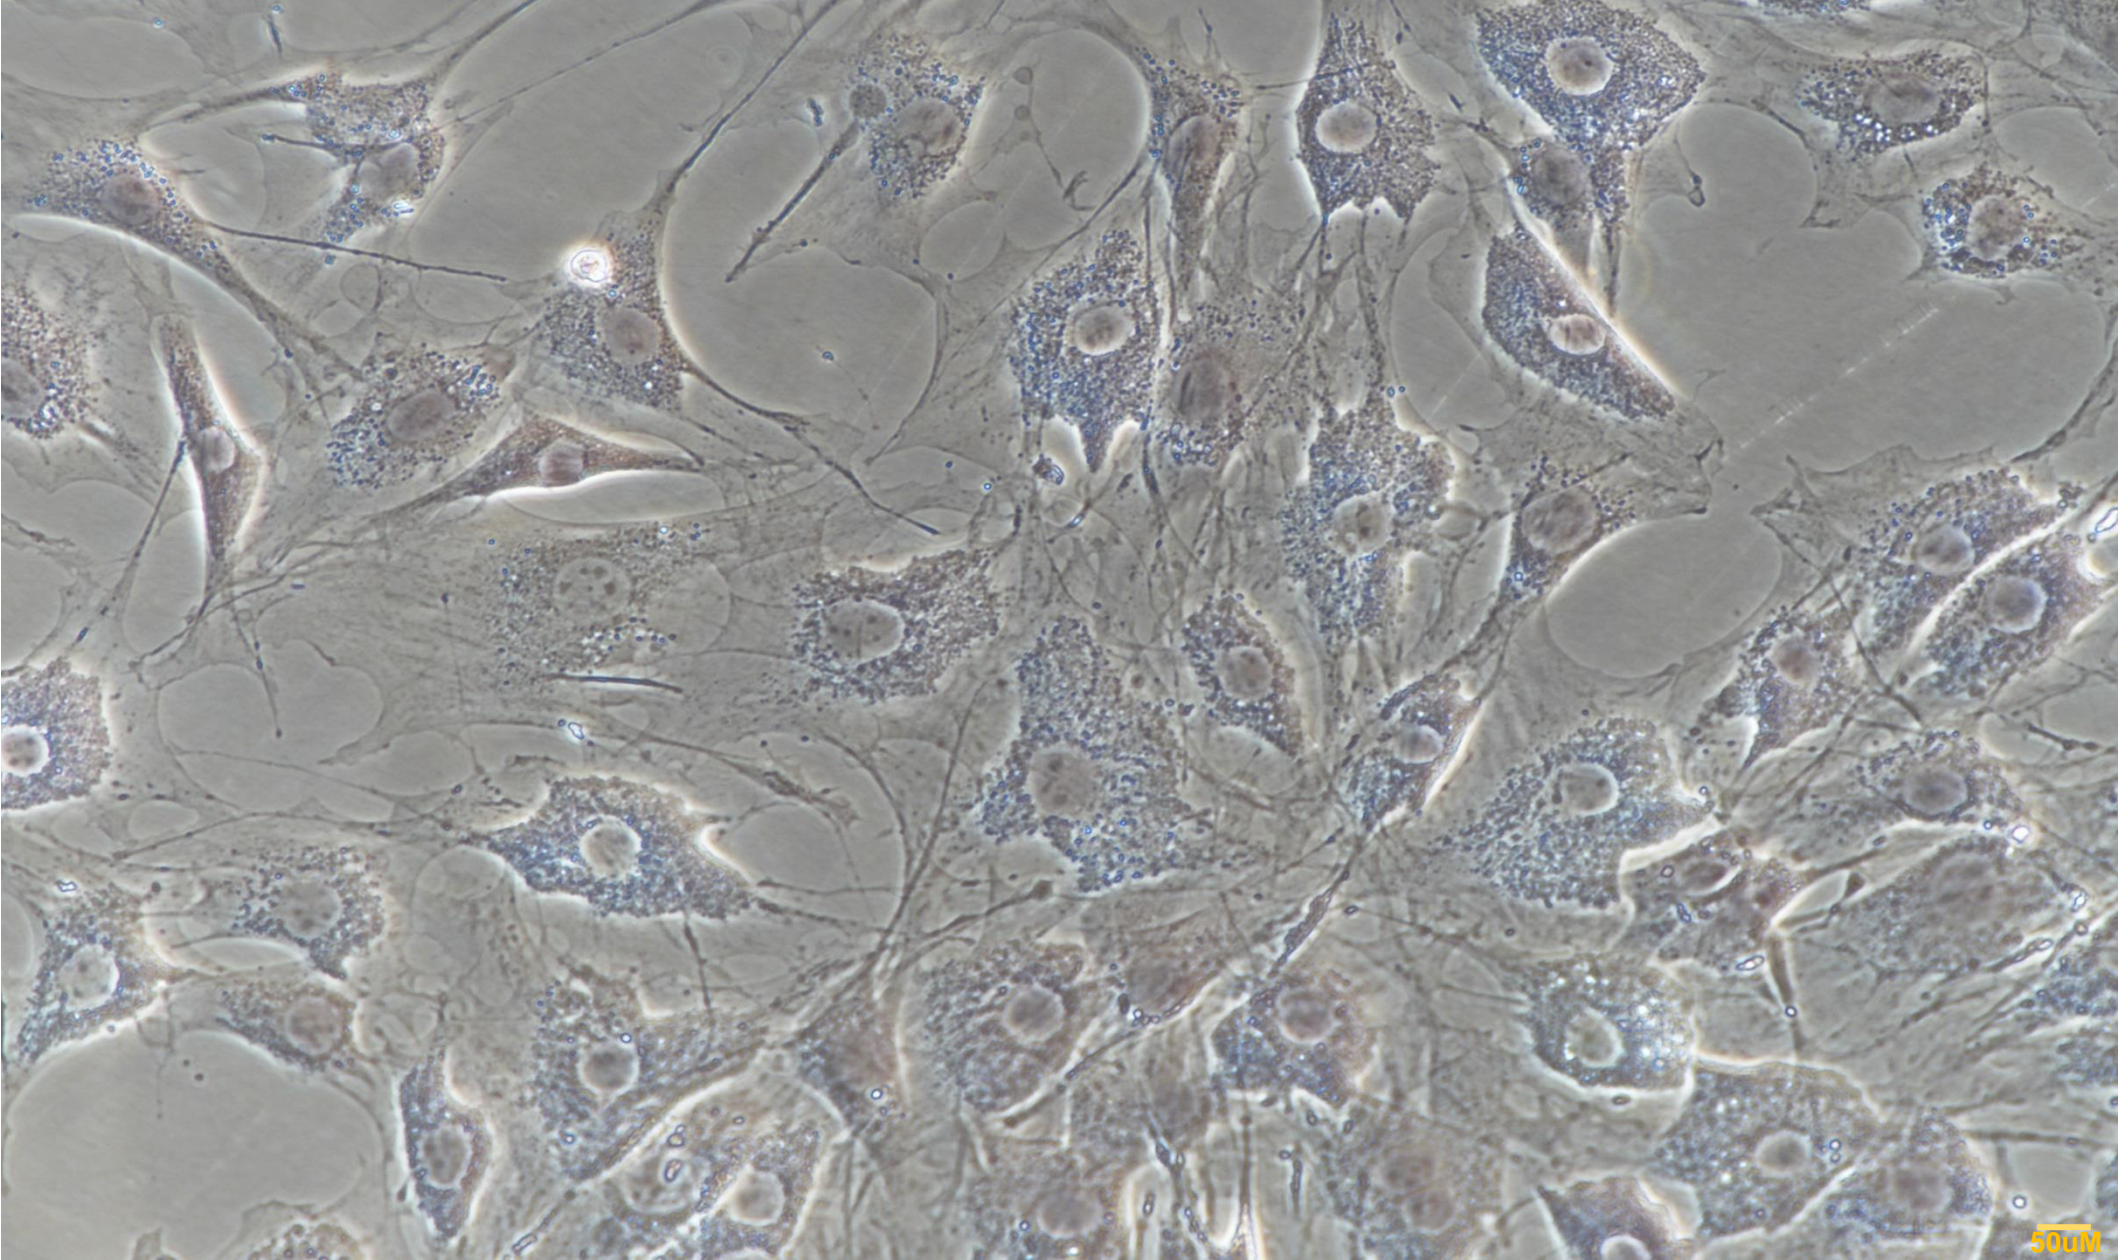

D-8

AM + RAP KD

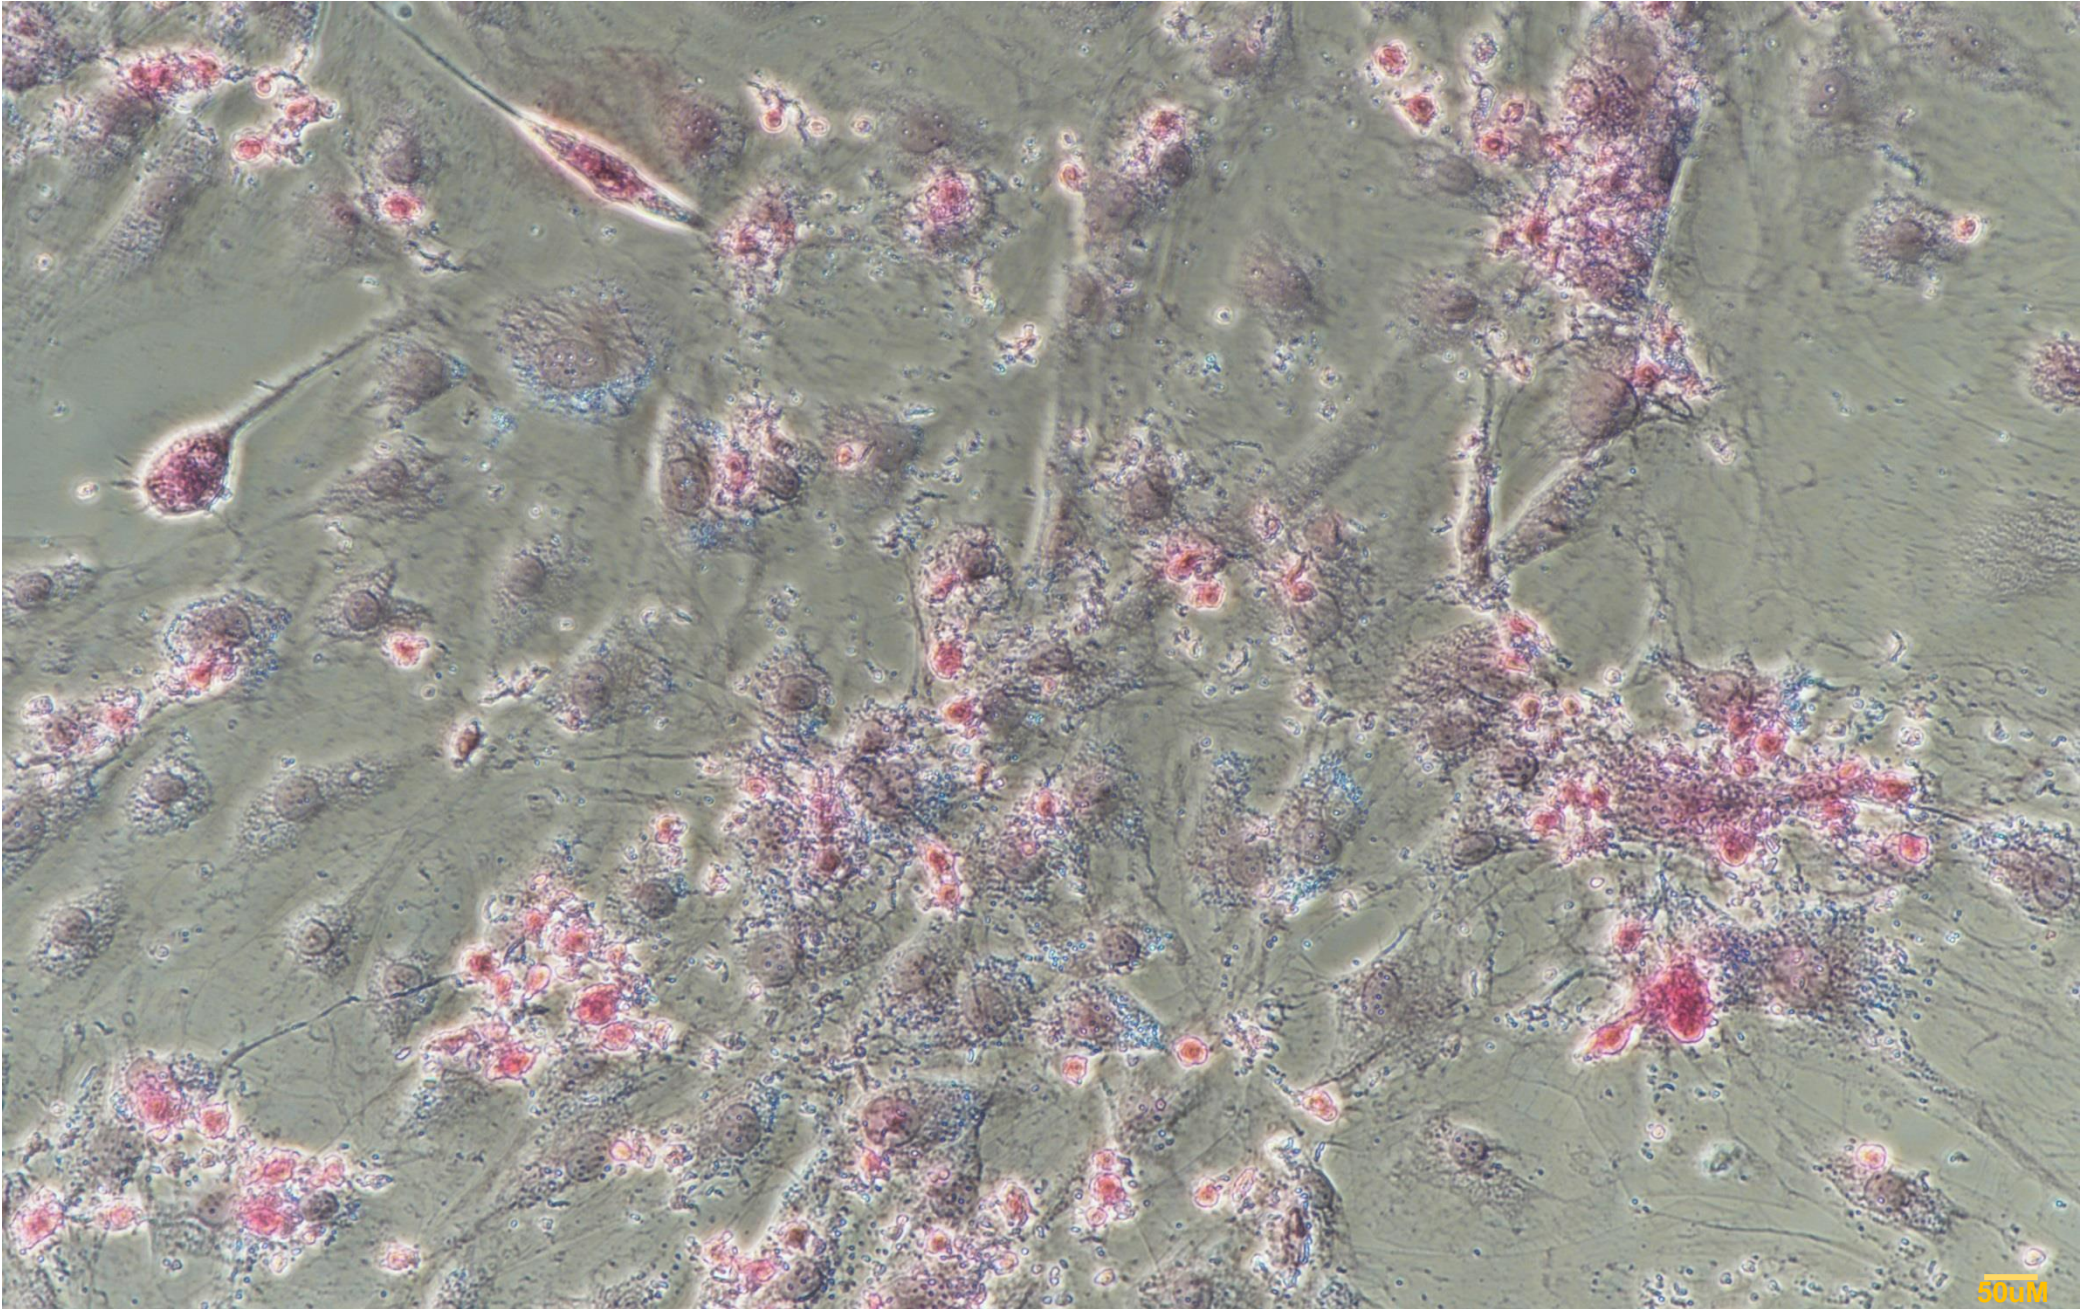

**Fig.2 D)**

**D-0**

**AM + Scr**

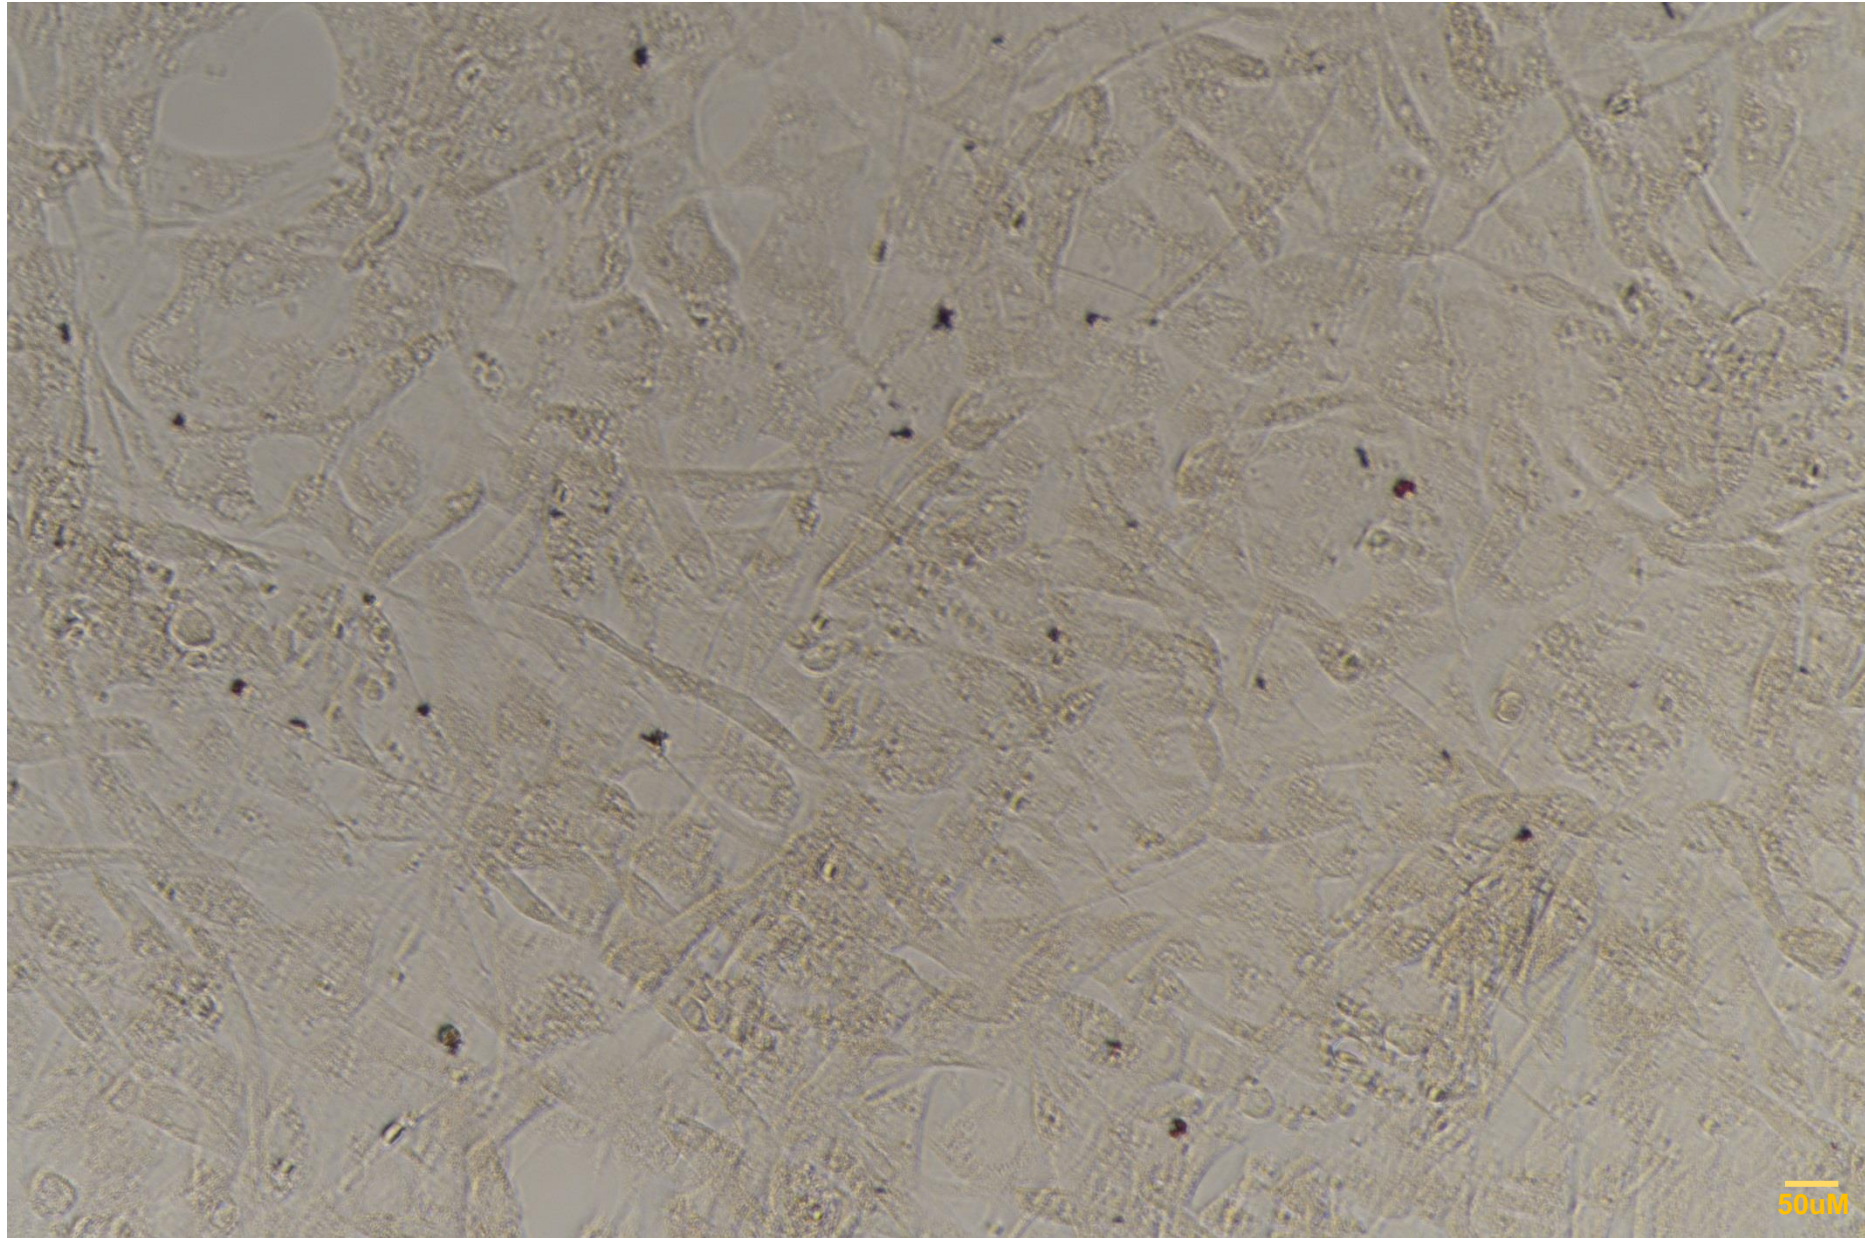

D-8 AM + Scr

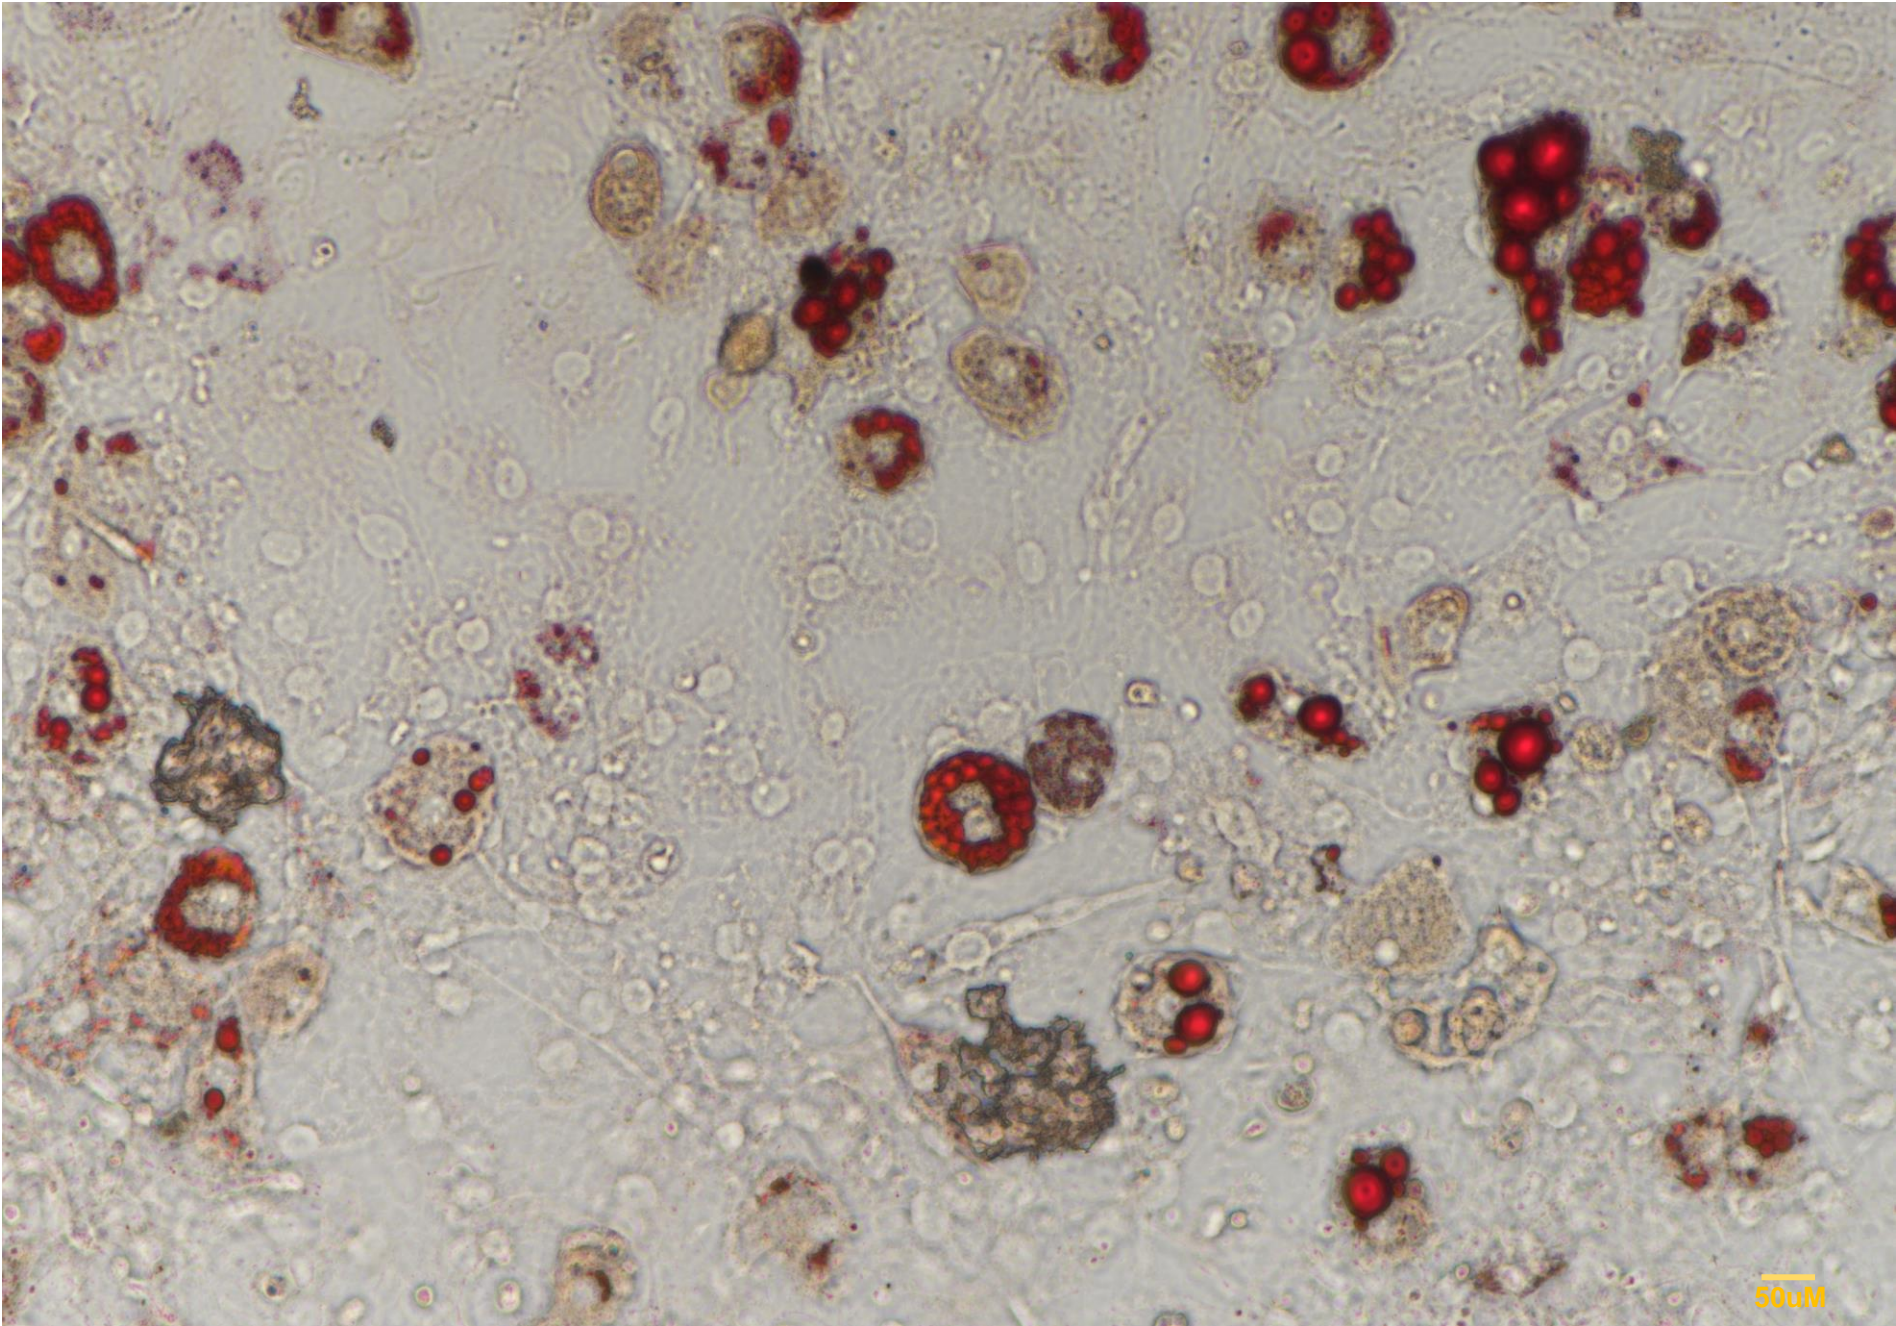

D-0 AM + RIC KD

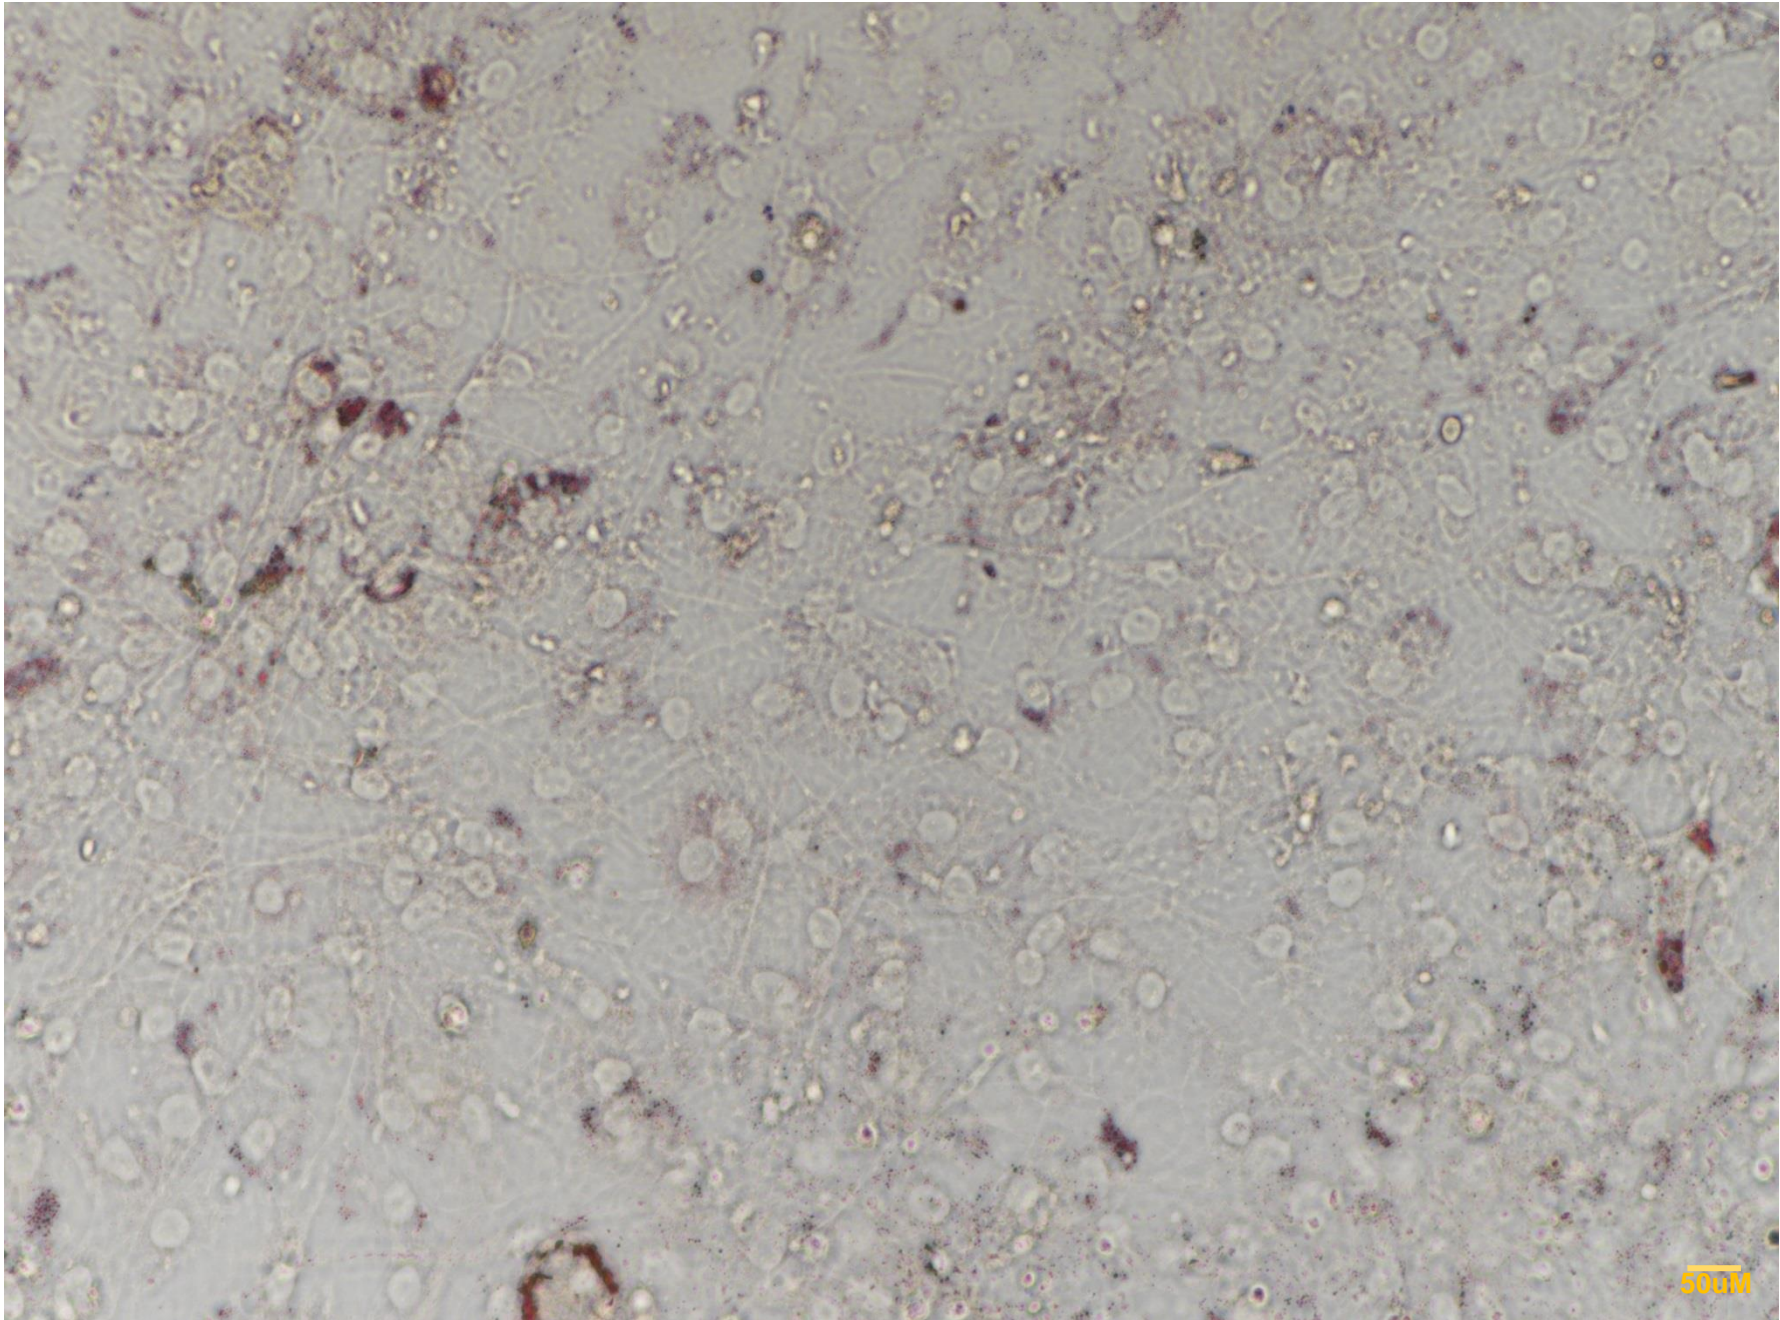

D-8 AM + RIC KD

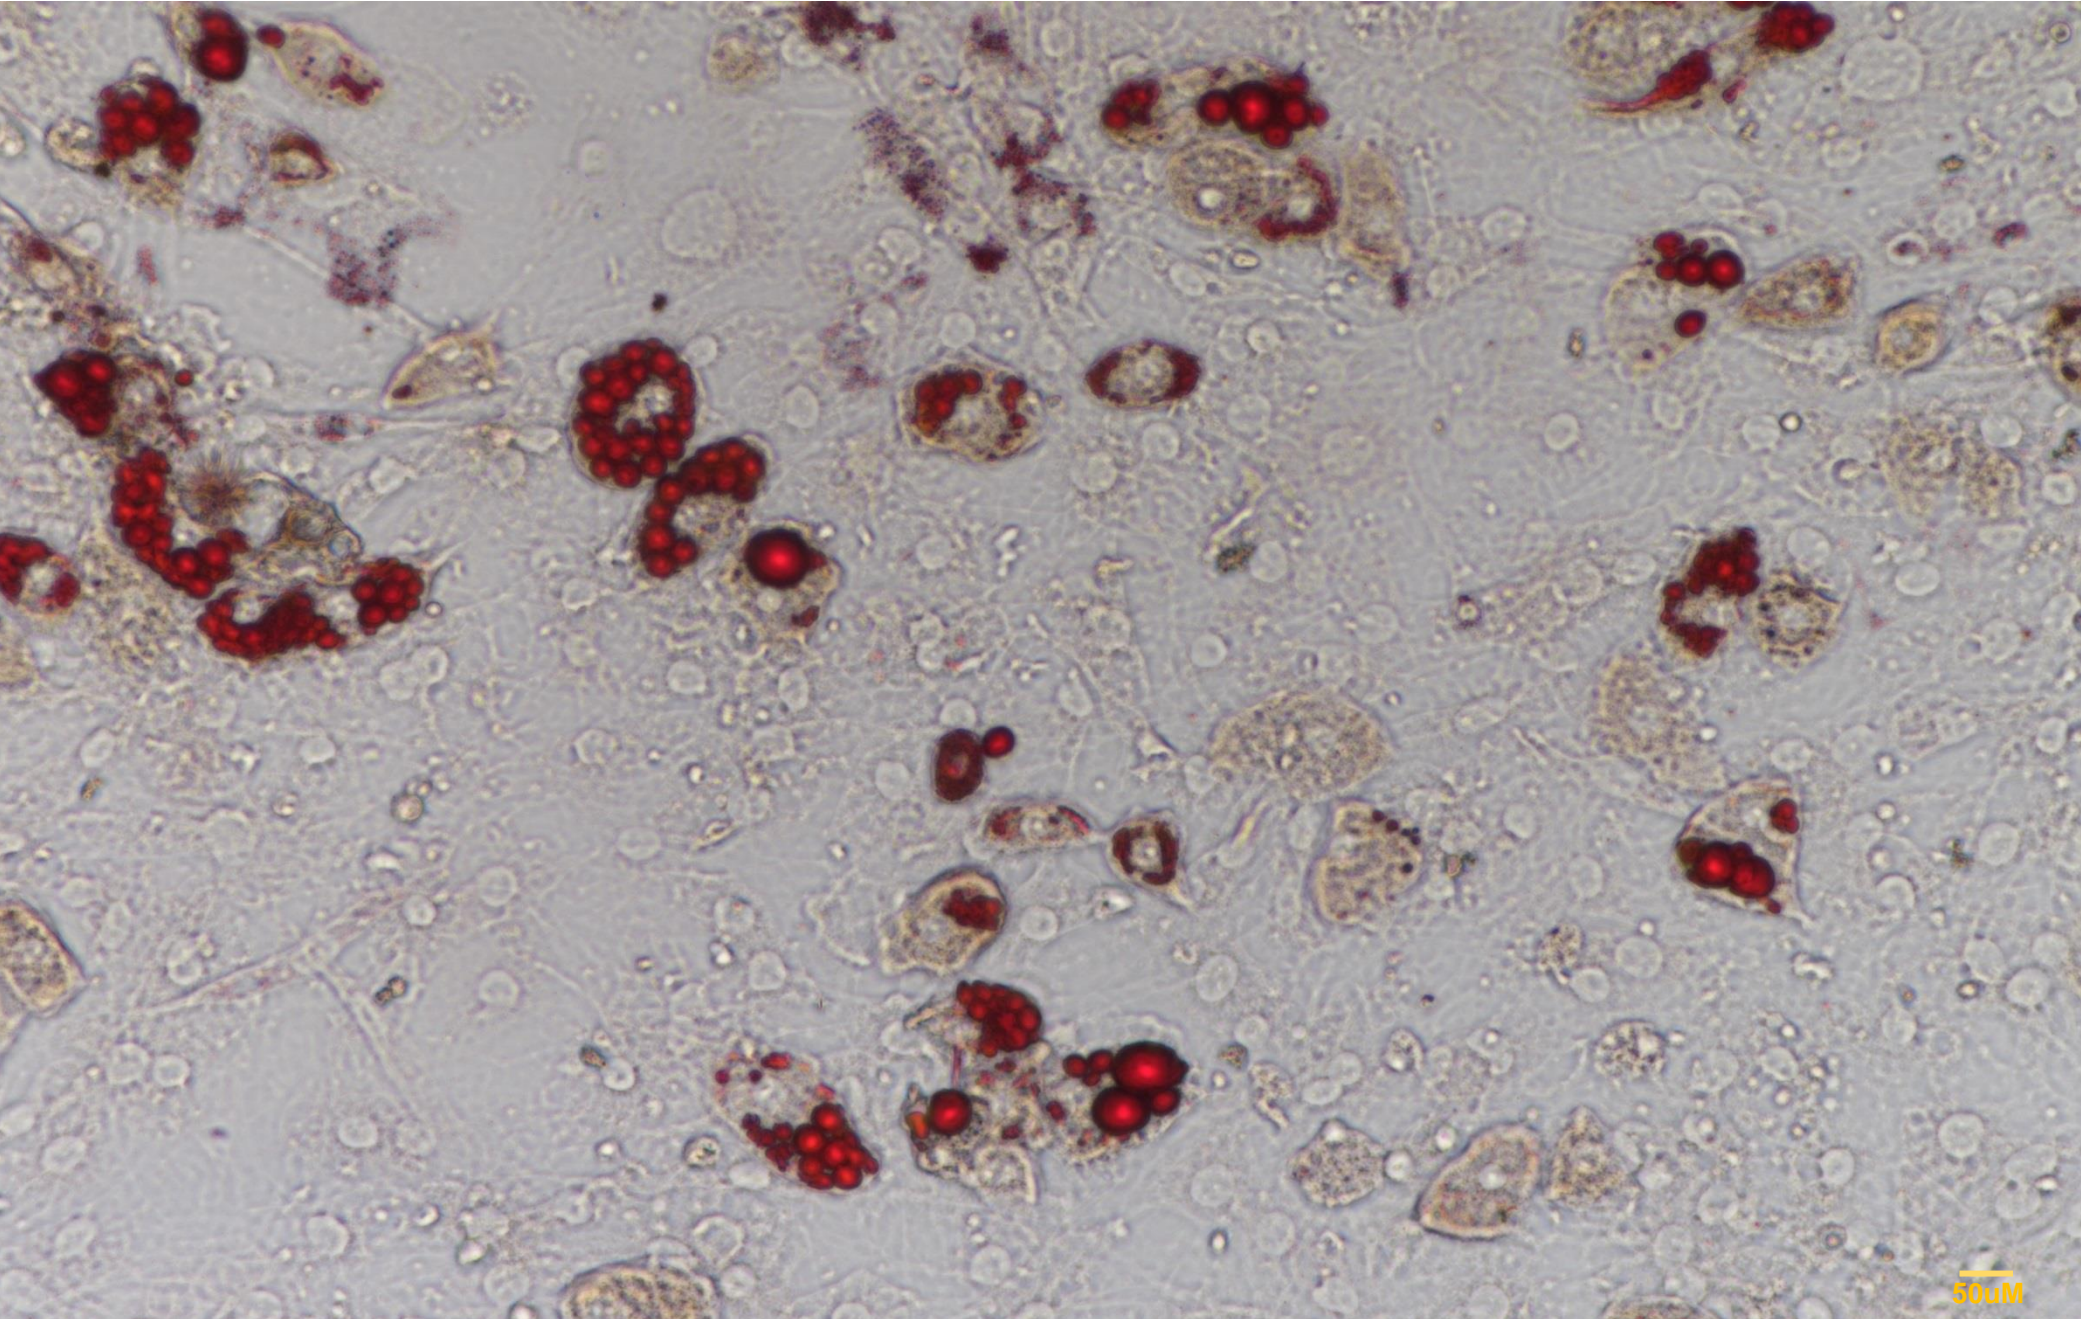



D-0

AM + RAP KD

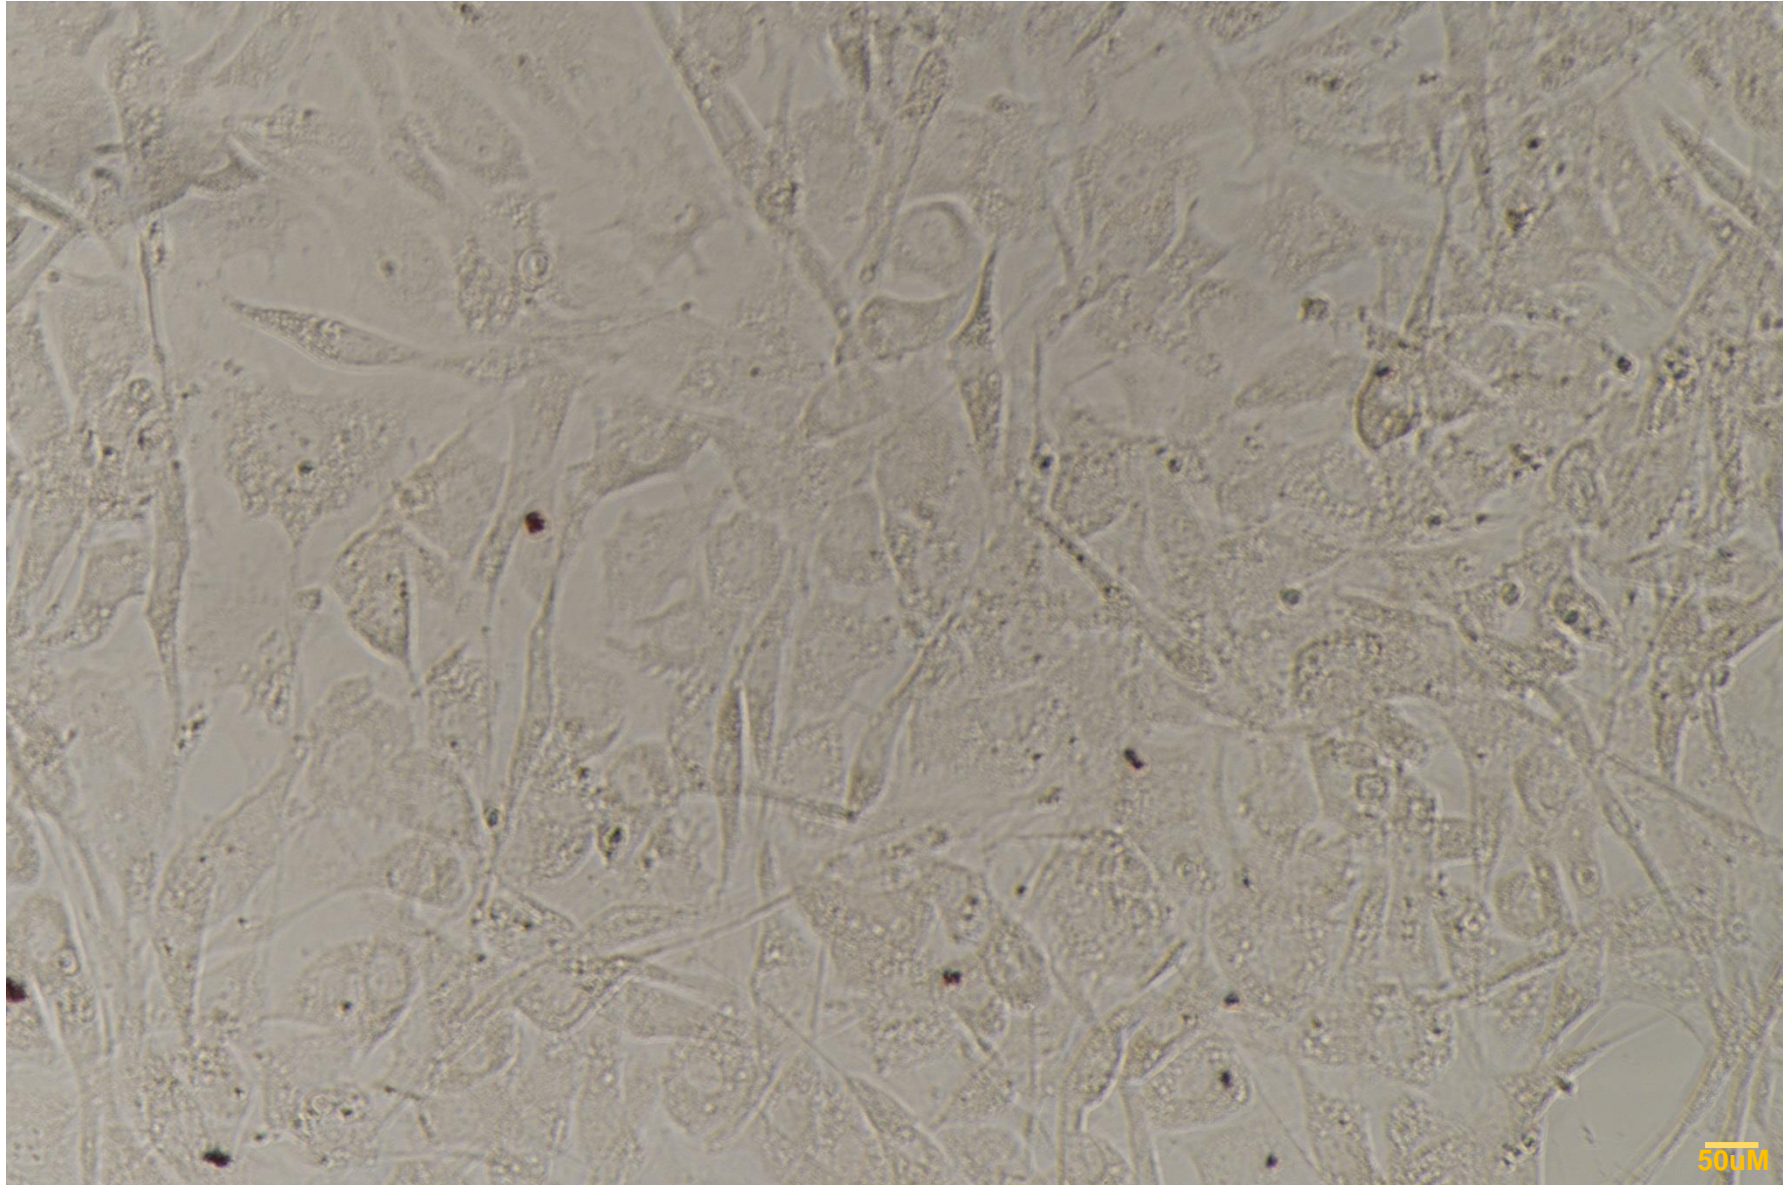

D-8

AM + RAP KD

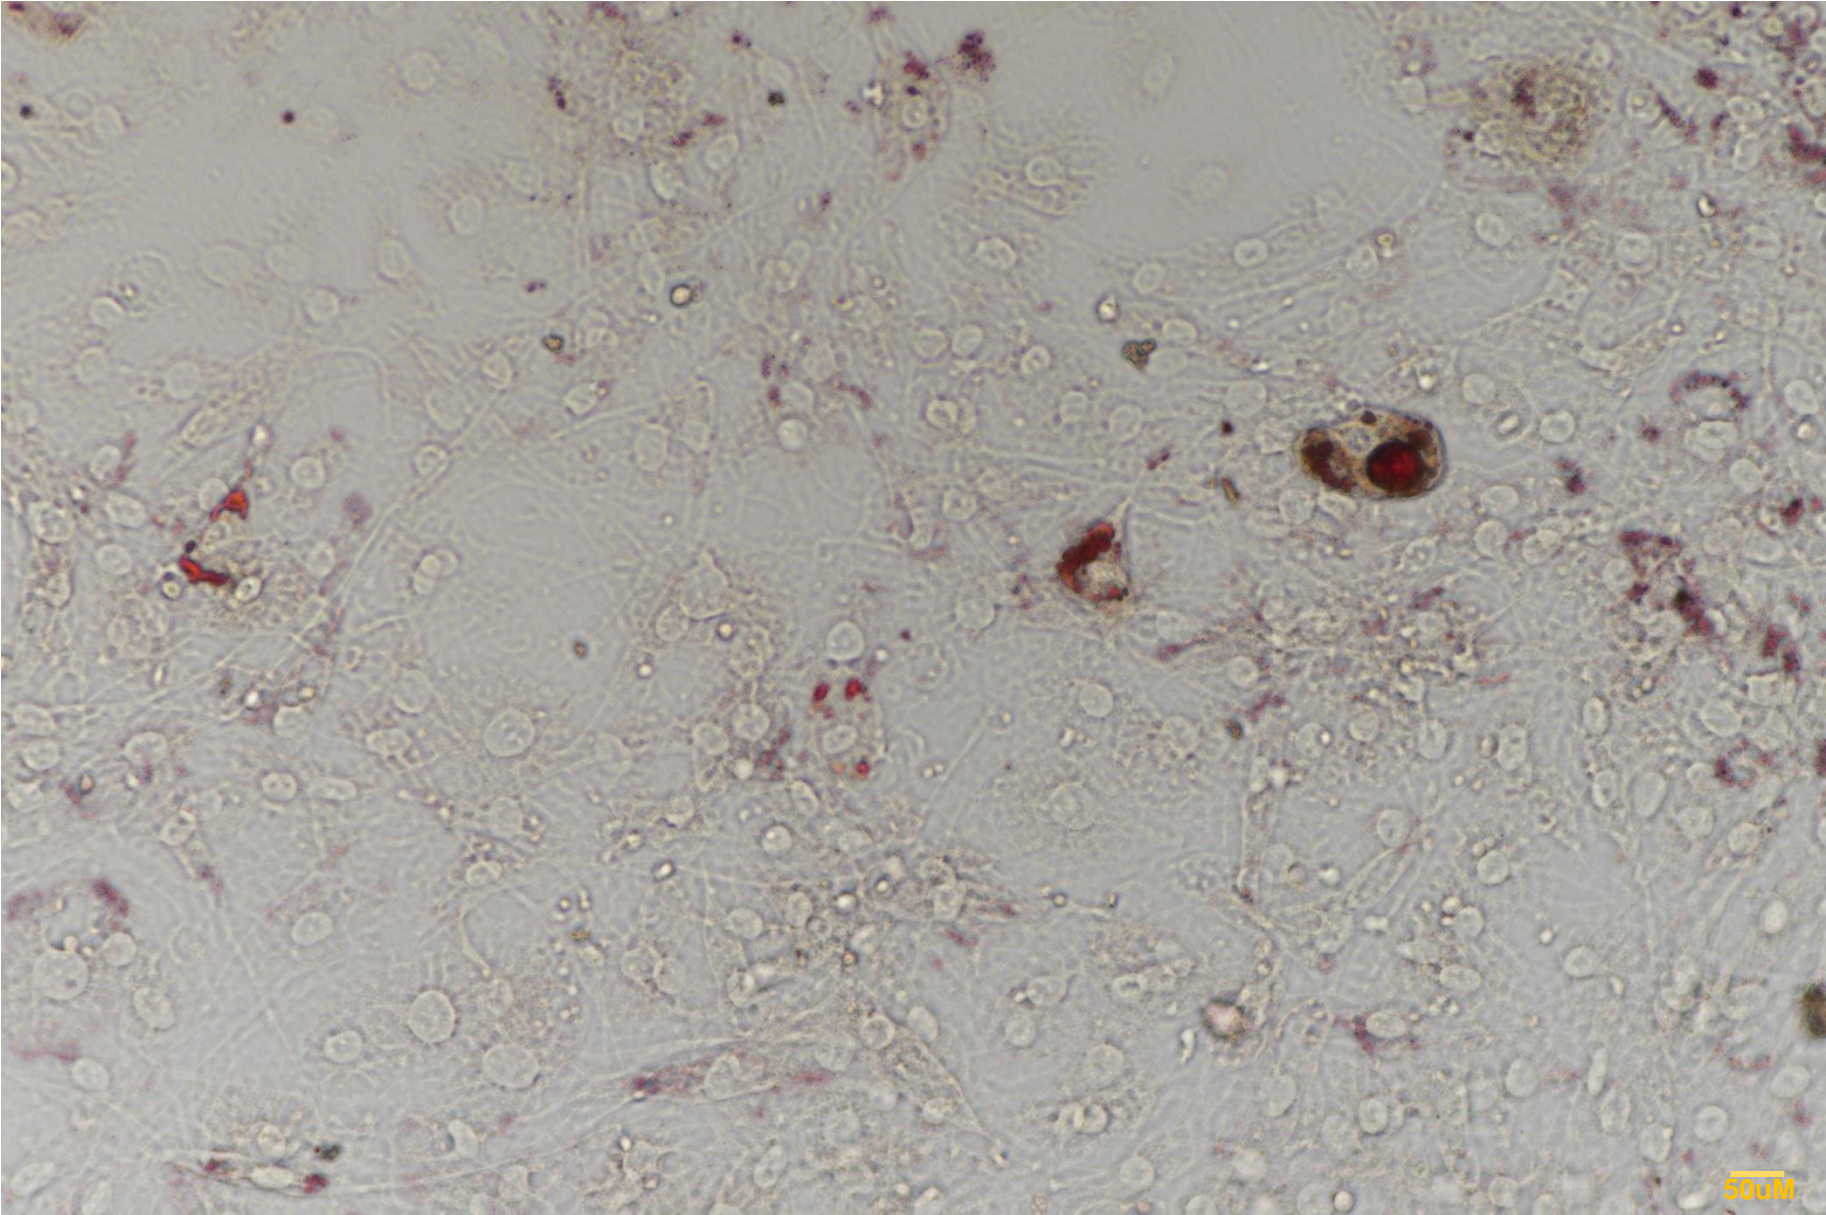

Fig.2 G)

UND

RUNX2

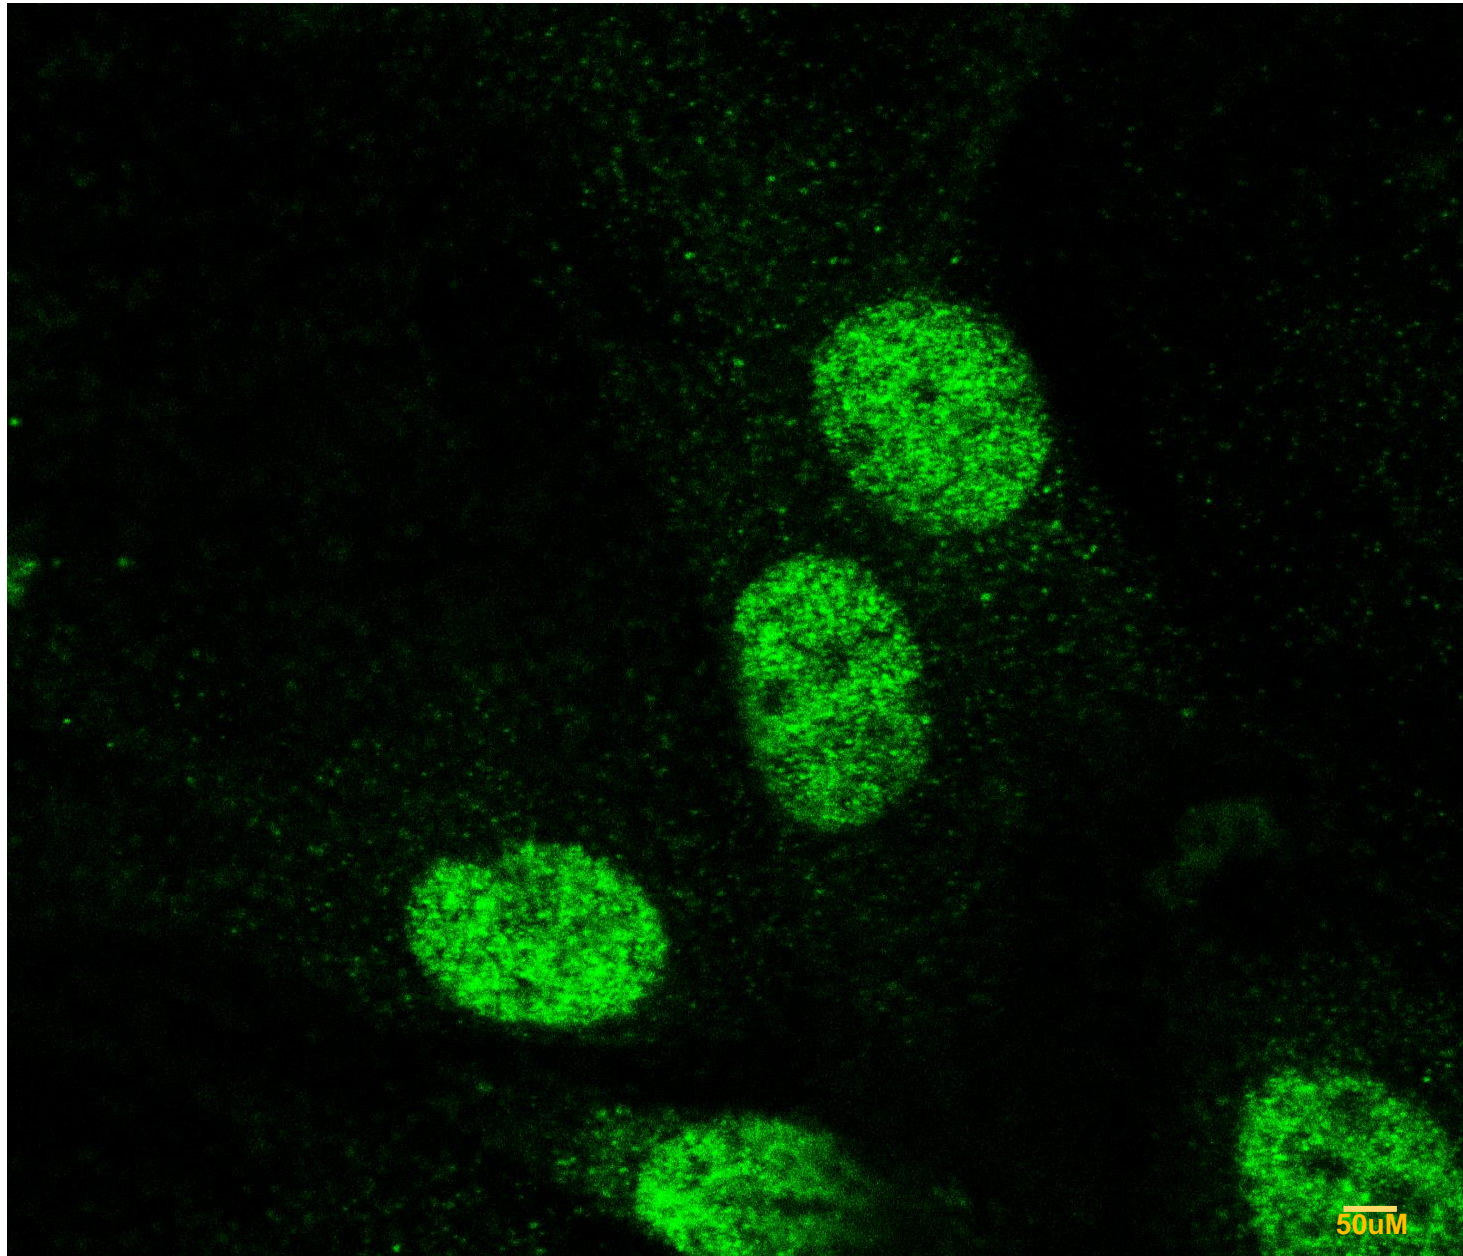

AM + Scr **RUNX2**

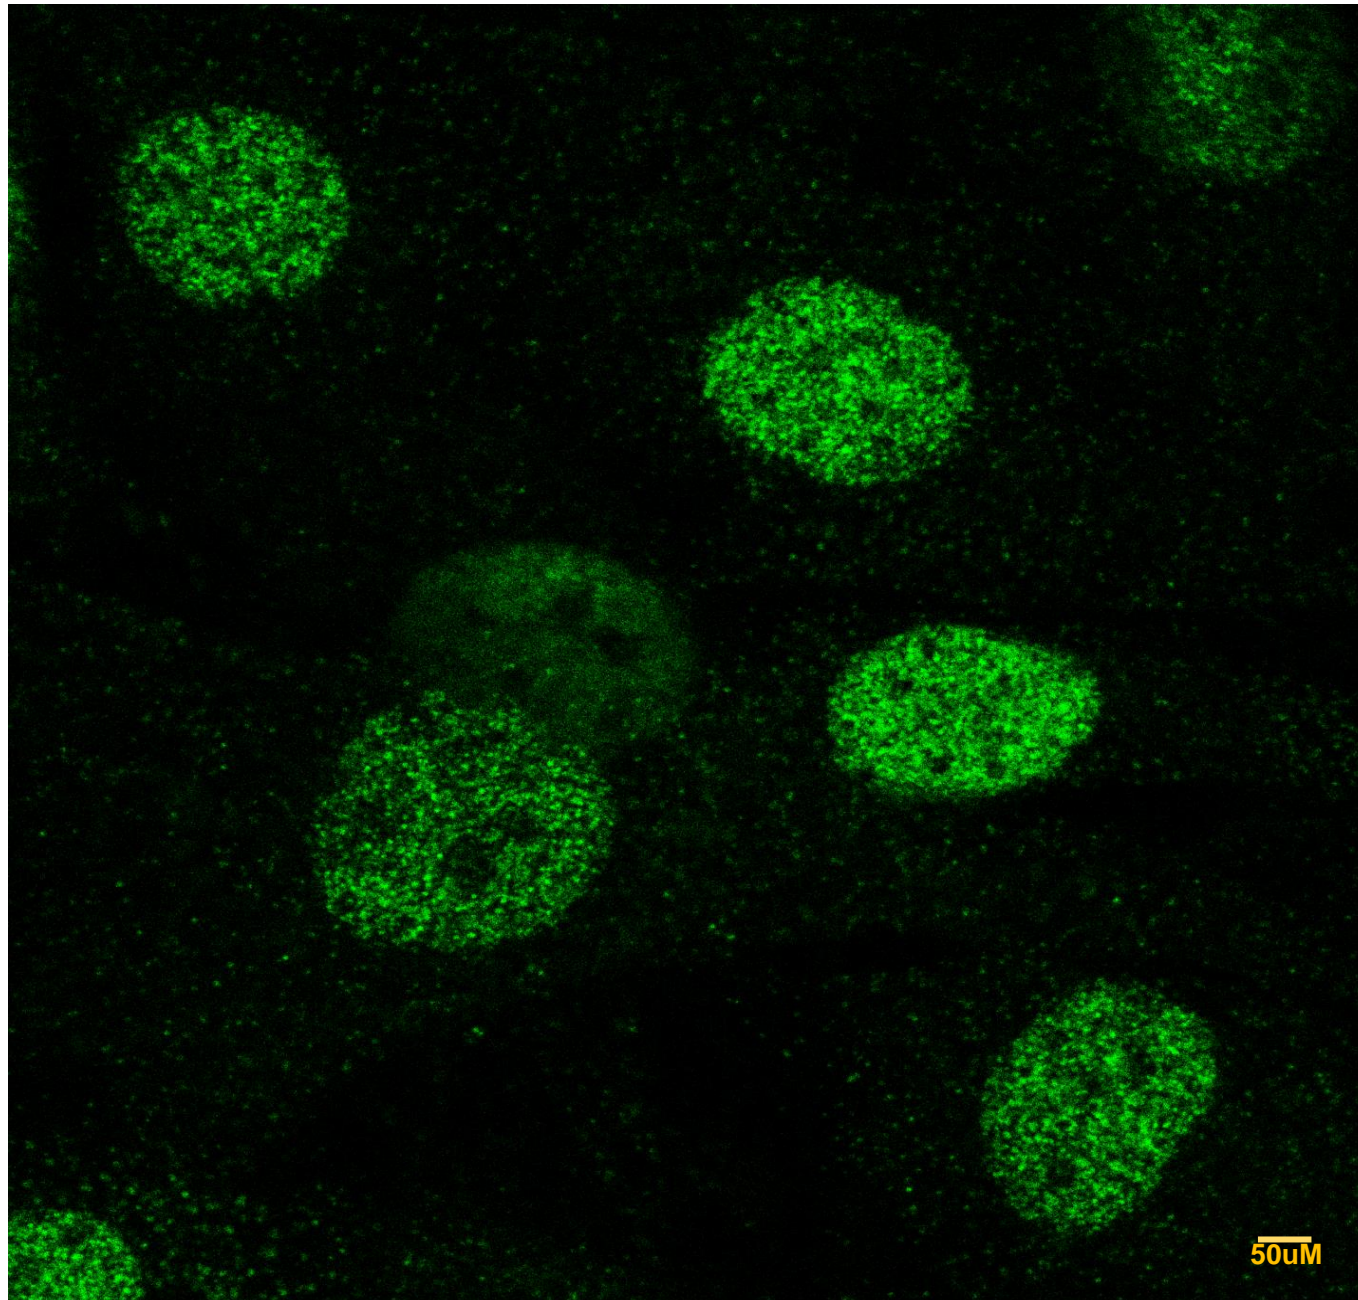

AM + RIC KD RUNX2

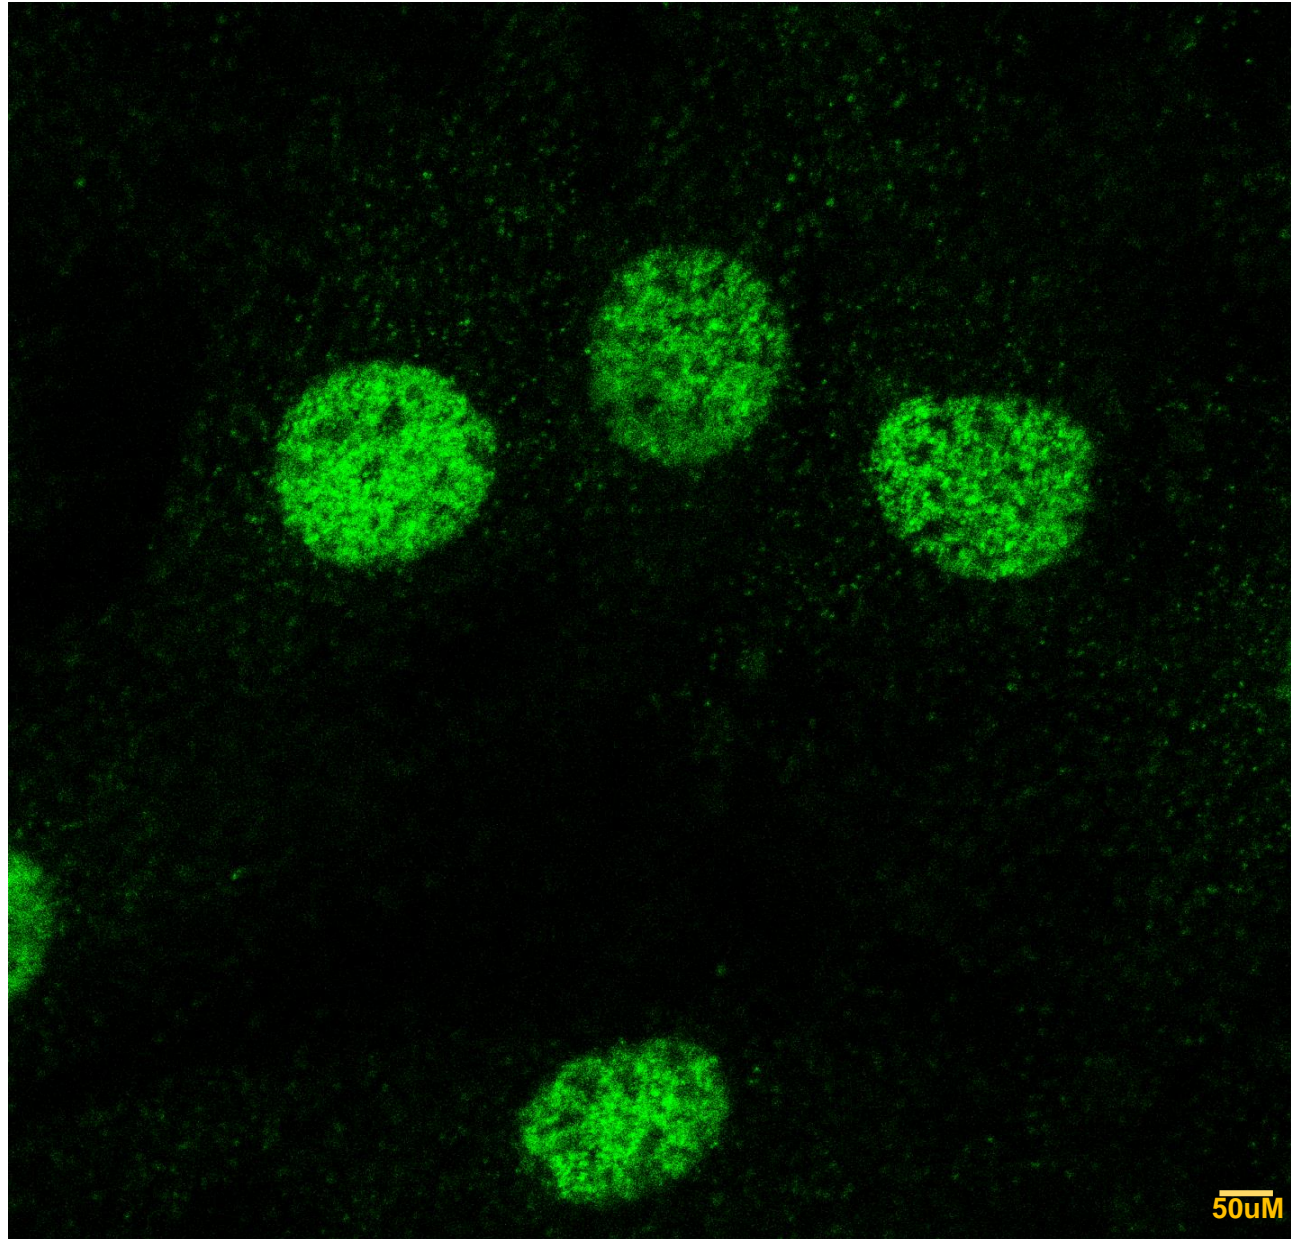

AM + RAP KD RUNX2

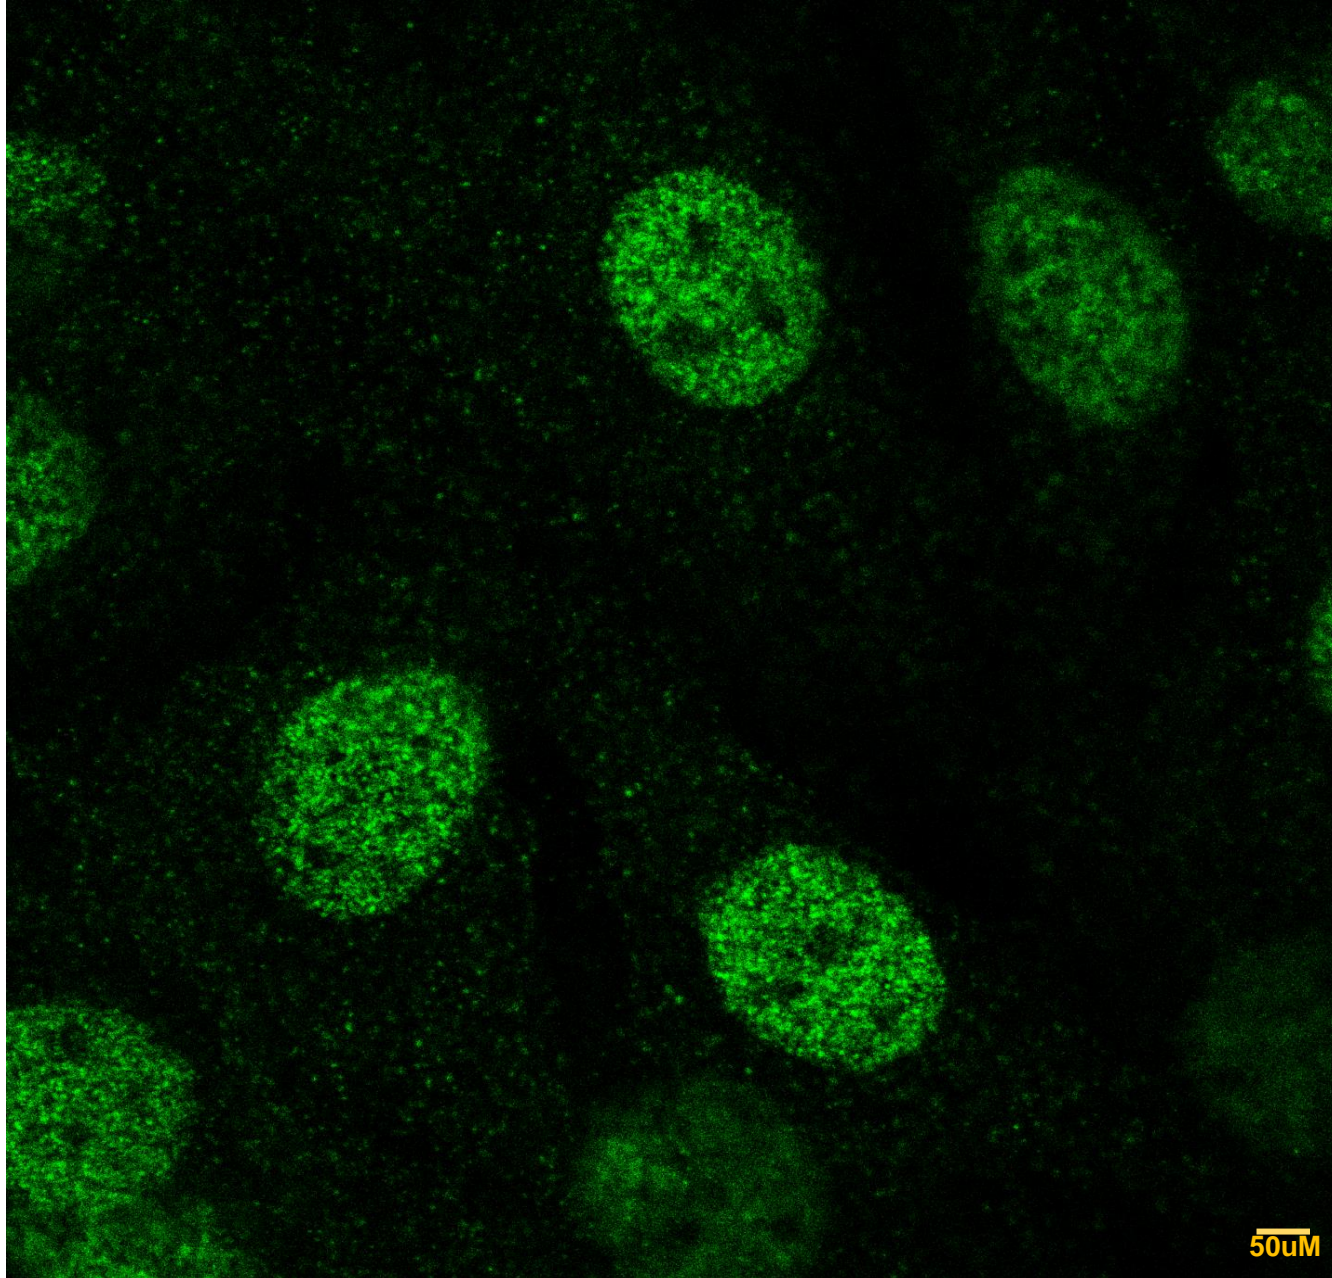

UND

GSK3 $\beta$

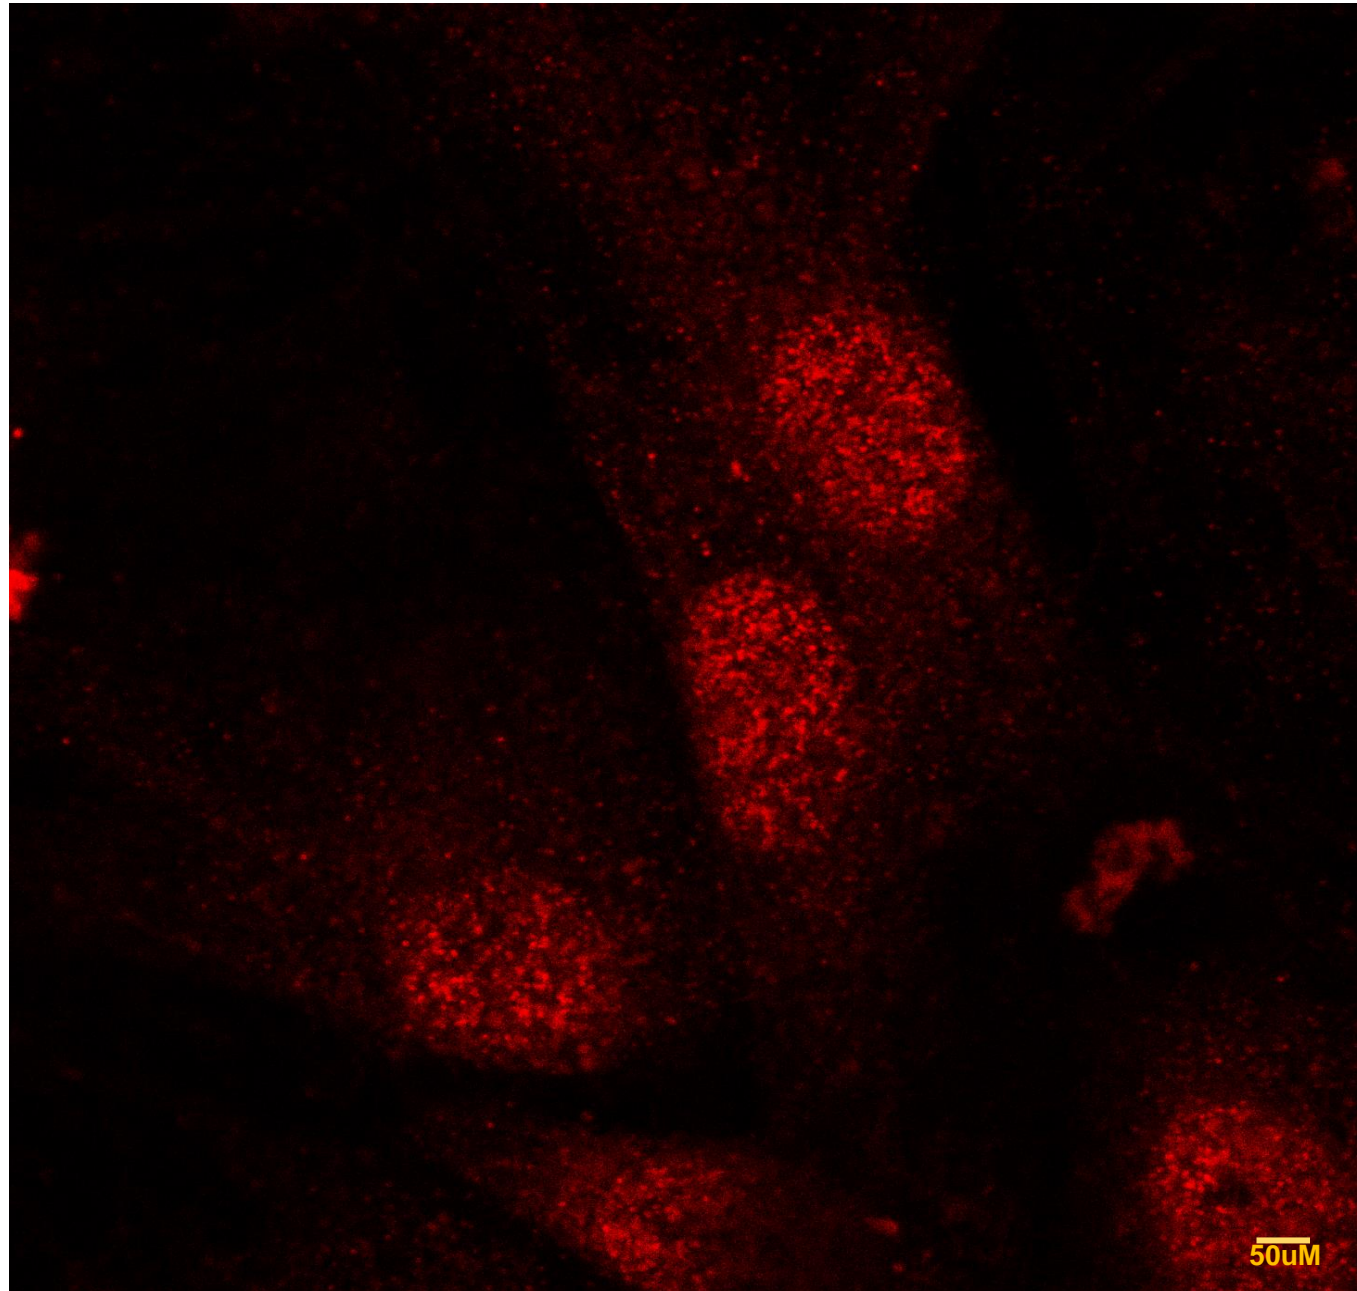

AM + Scr **GSK3 $\beta$**

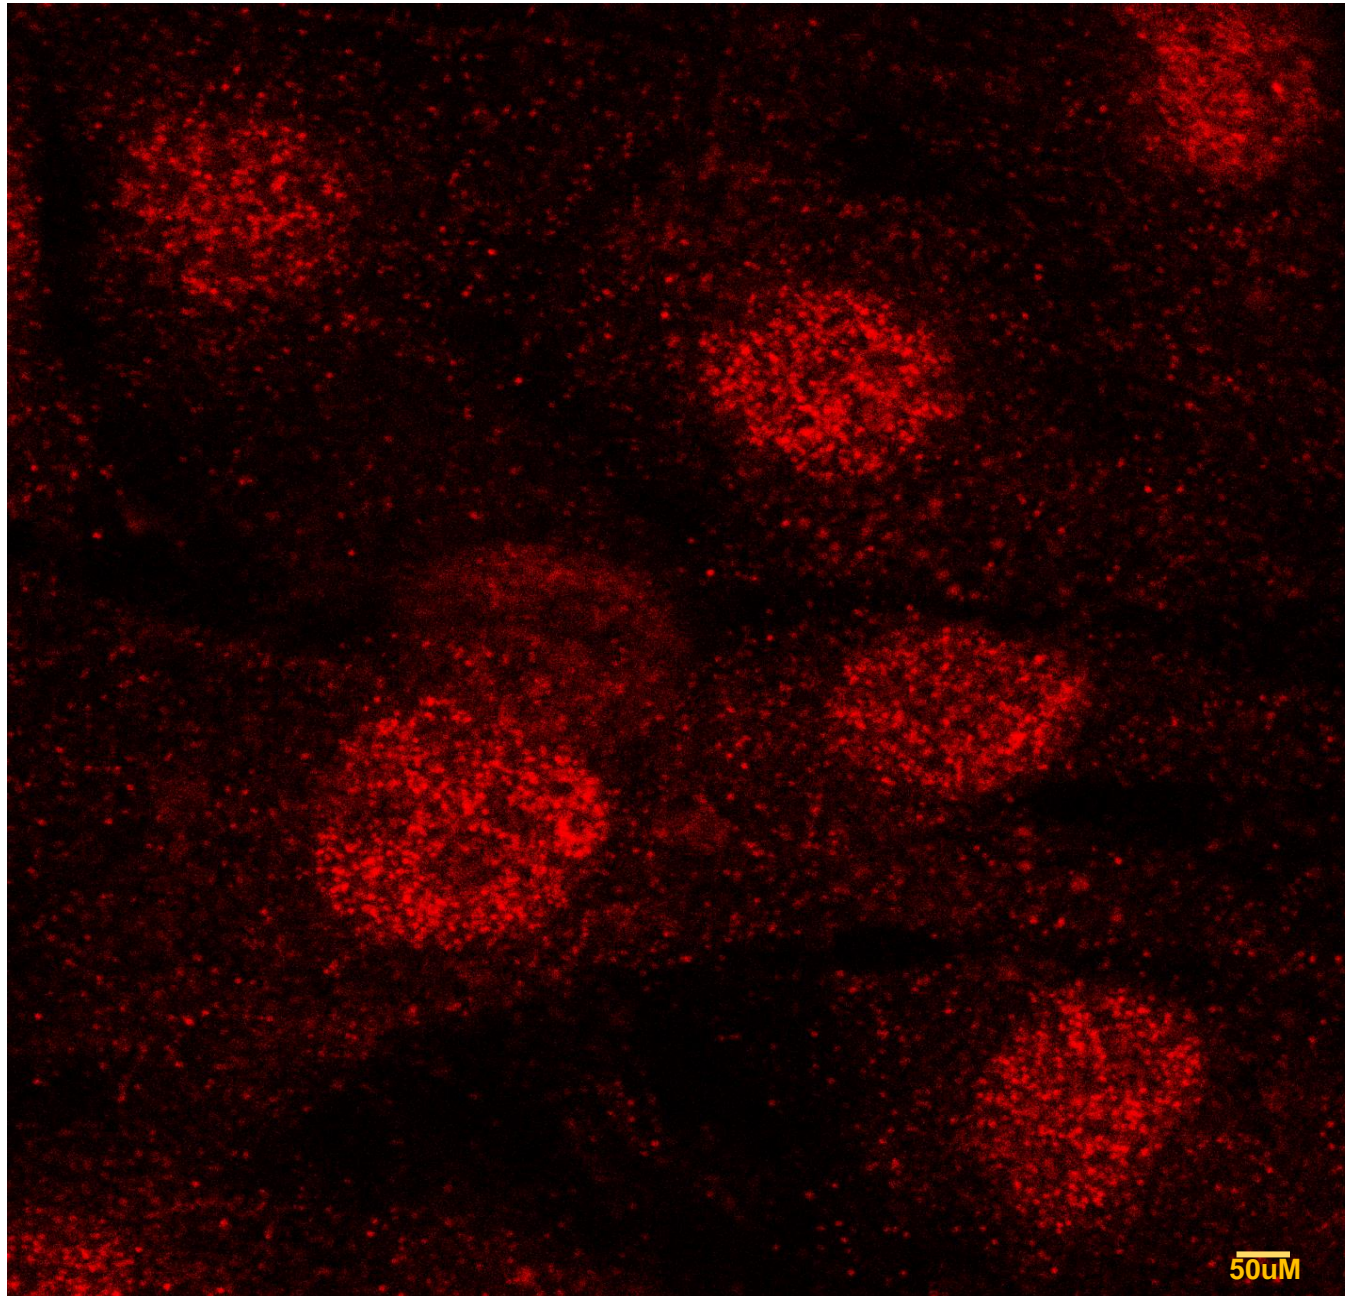



AM + RIC KD **GSK3 $\beta$**

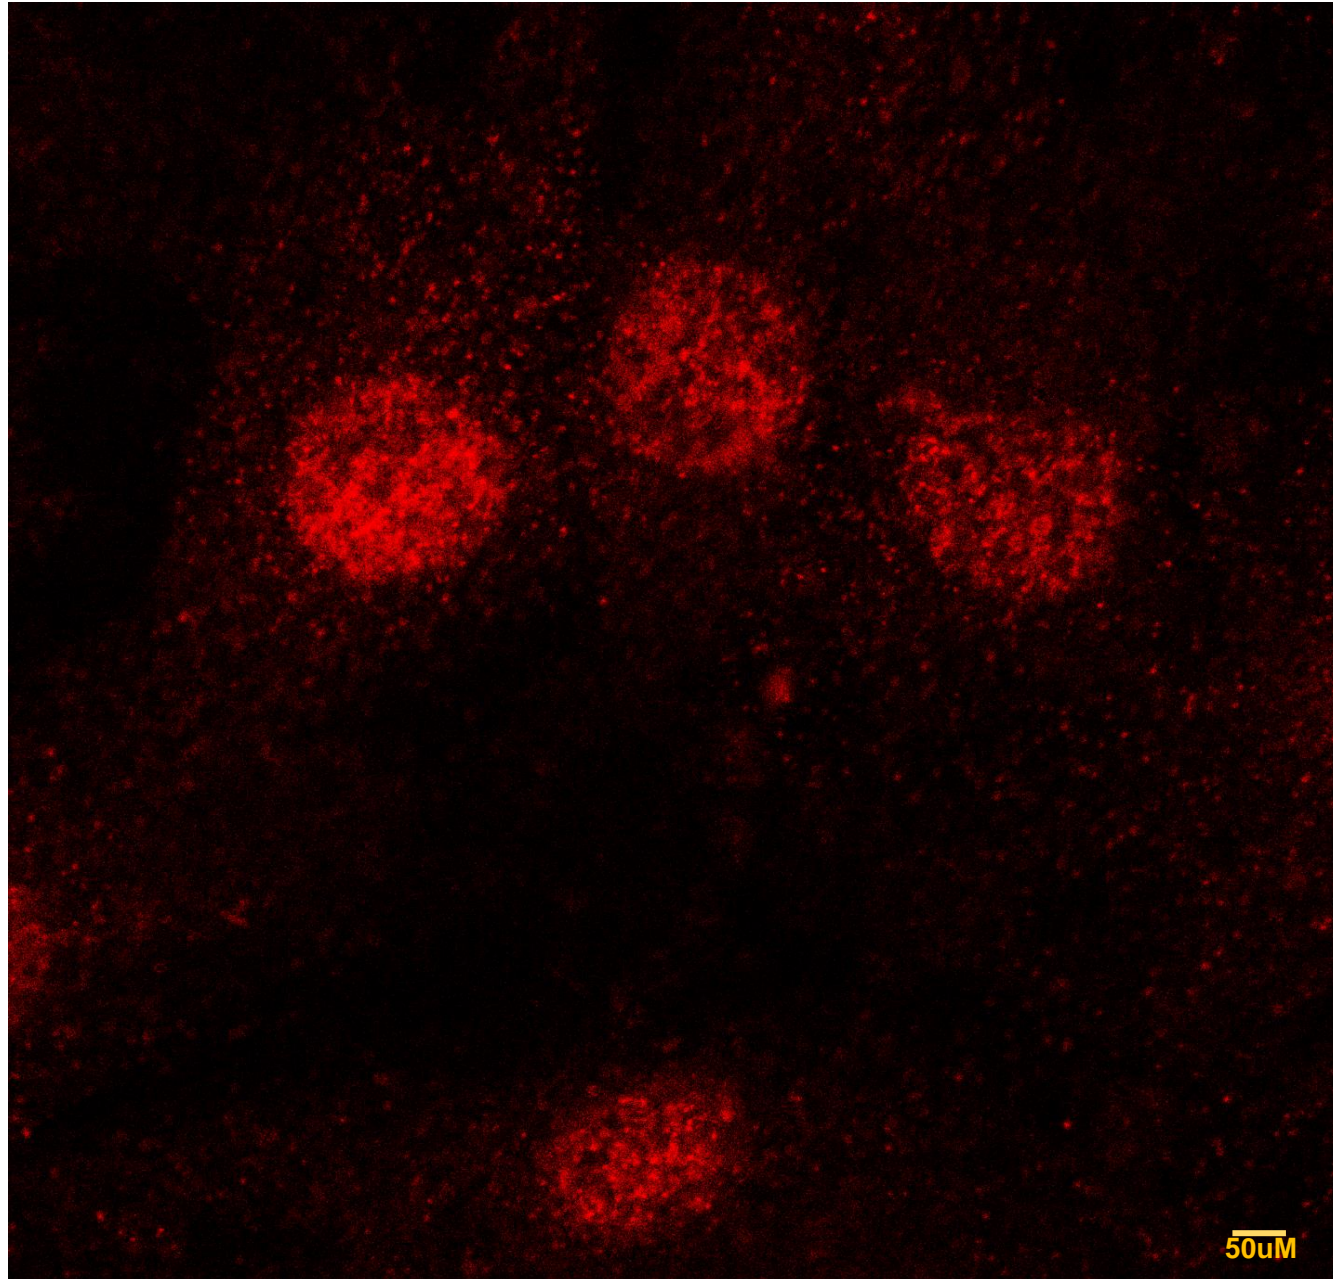

AM + RAP KD **GSK3 $\beta$**

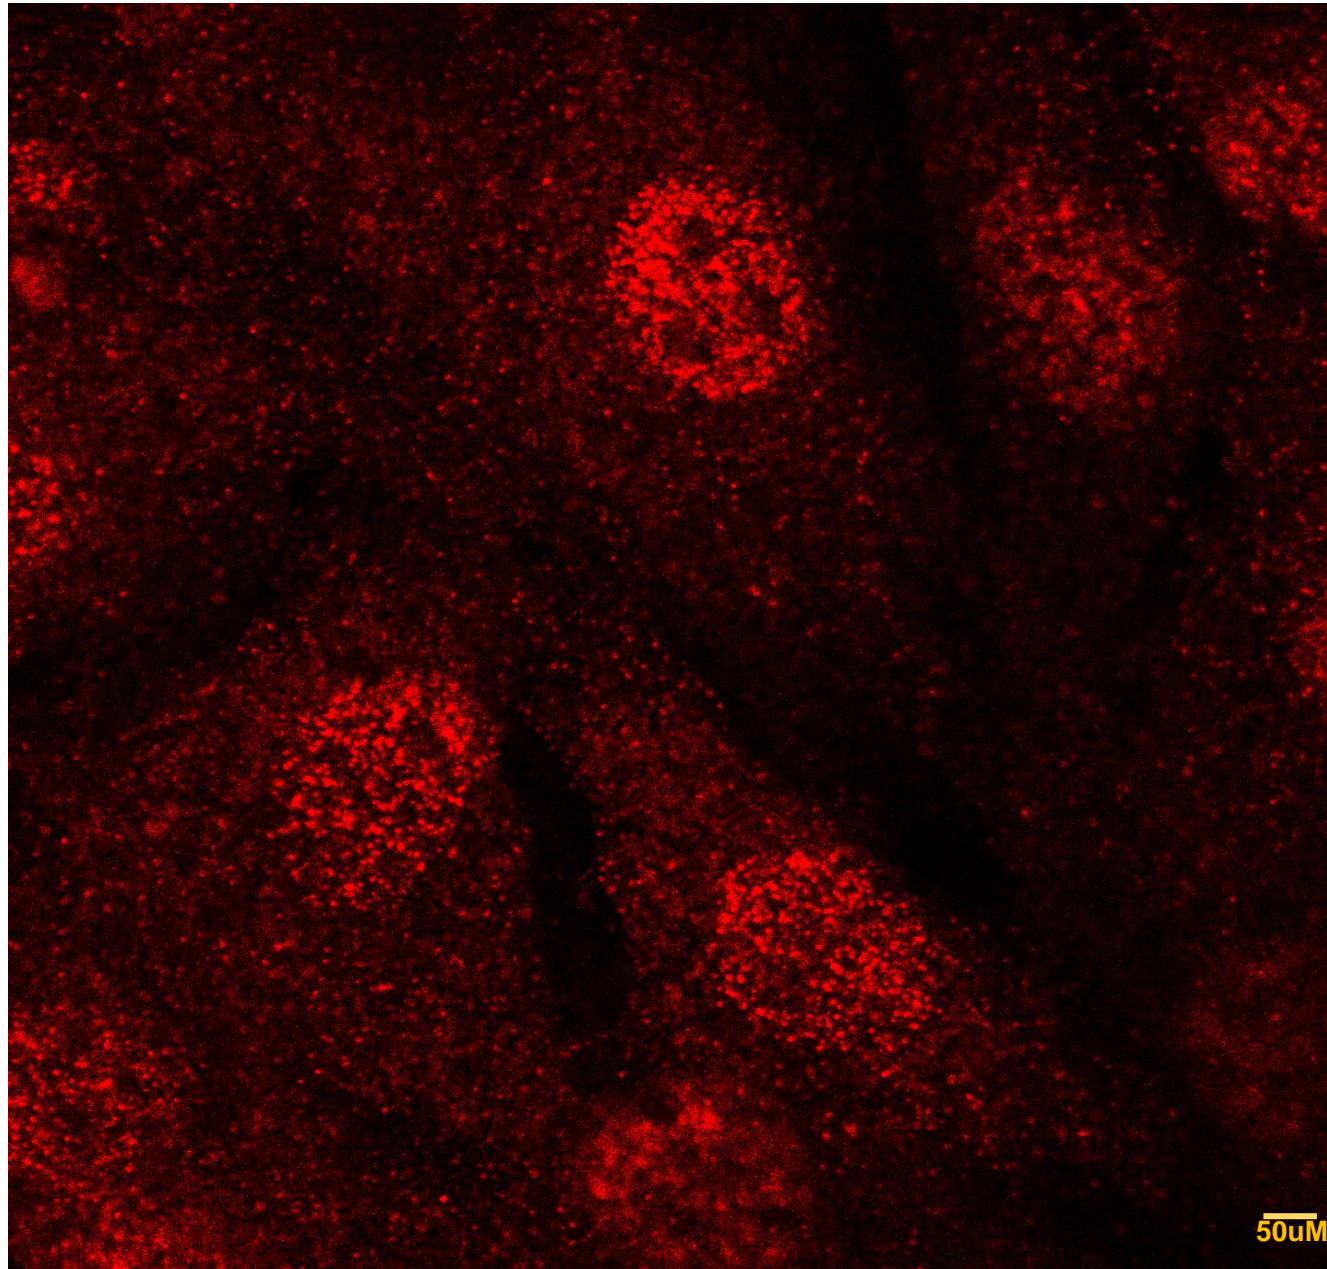

UND

MERGED

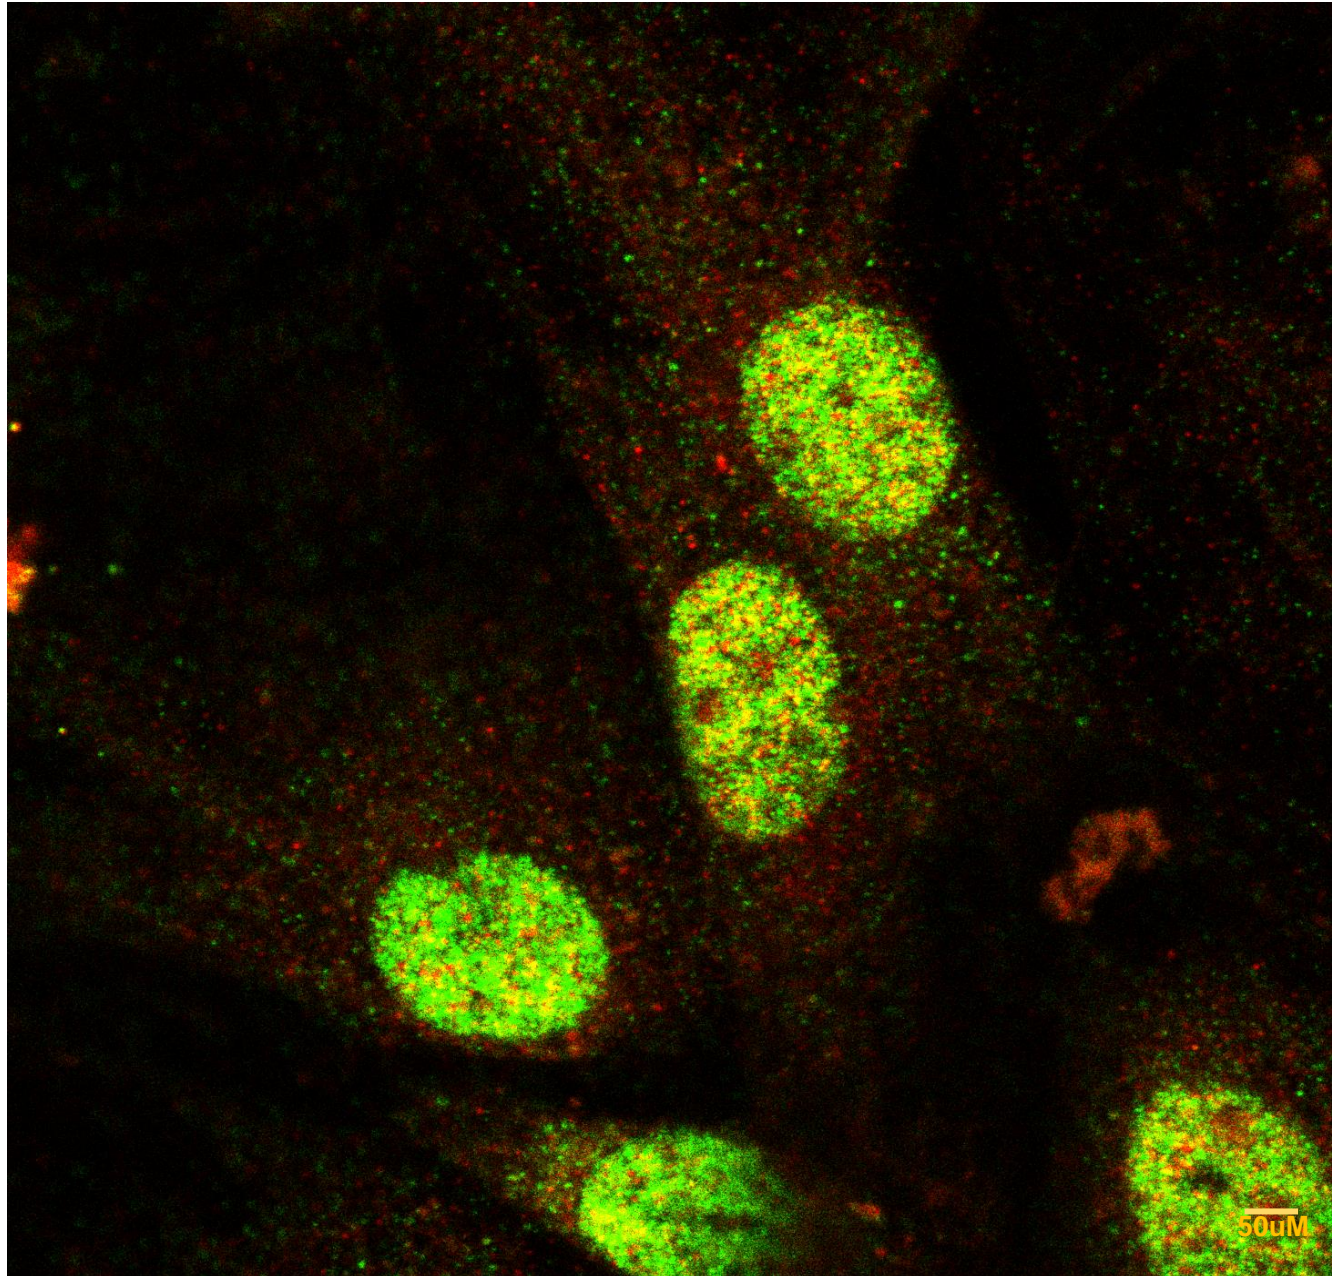

AM + Scr

MERGED

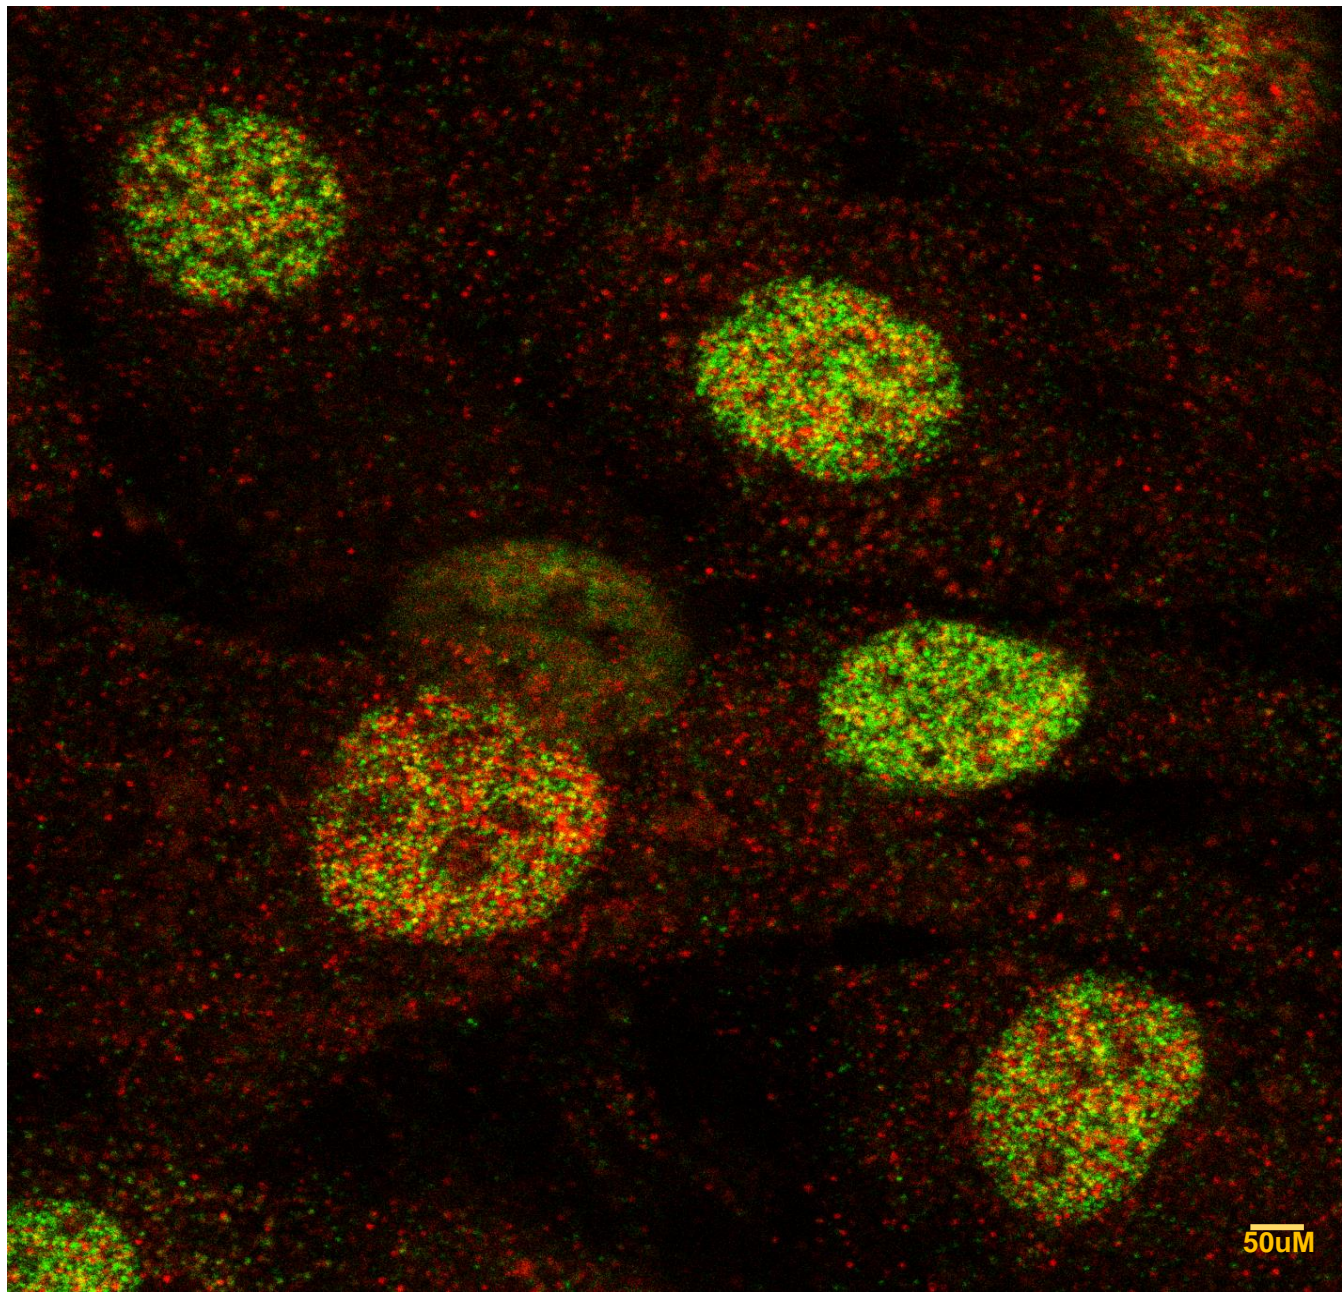

50μm

AM + RIC KD

MERGED

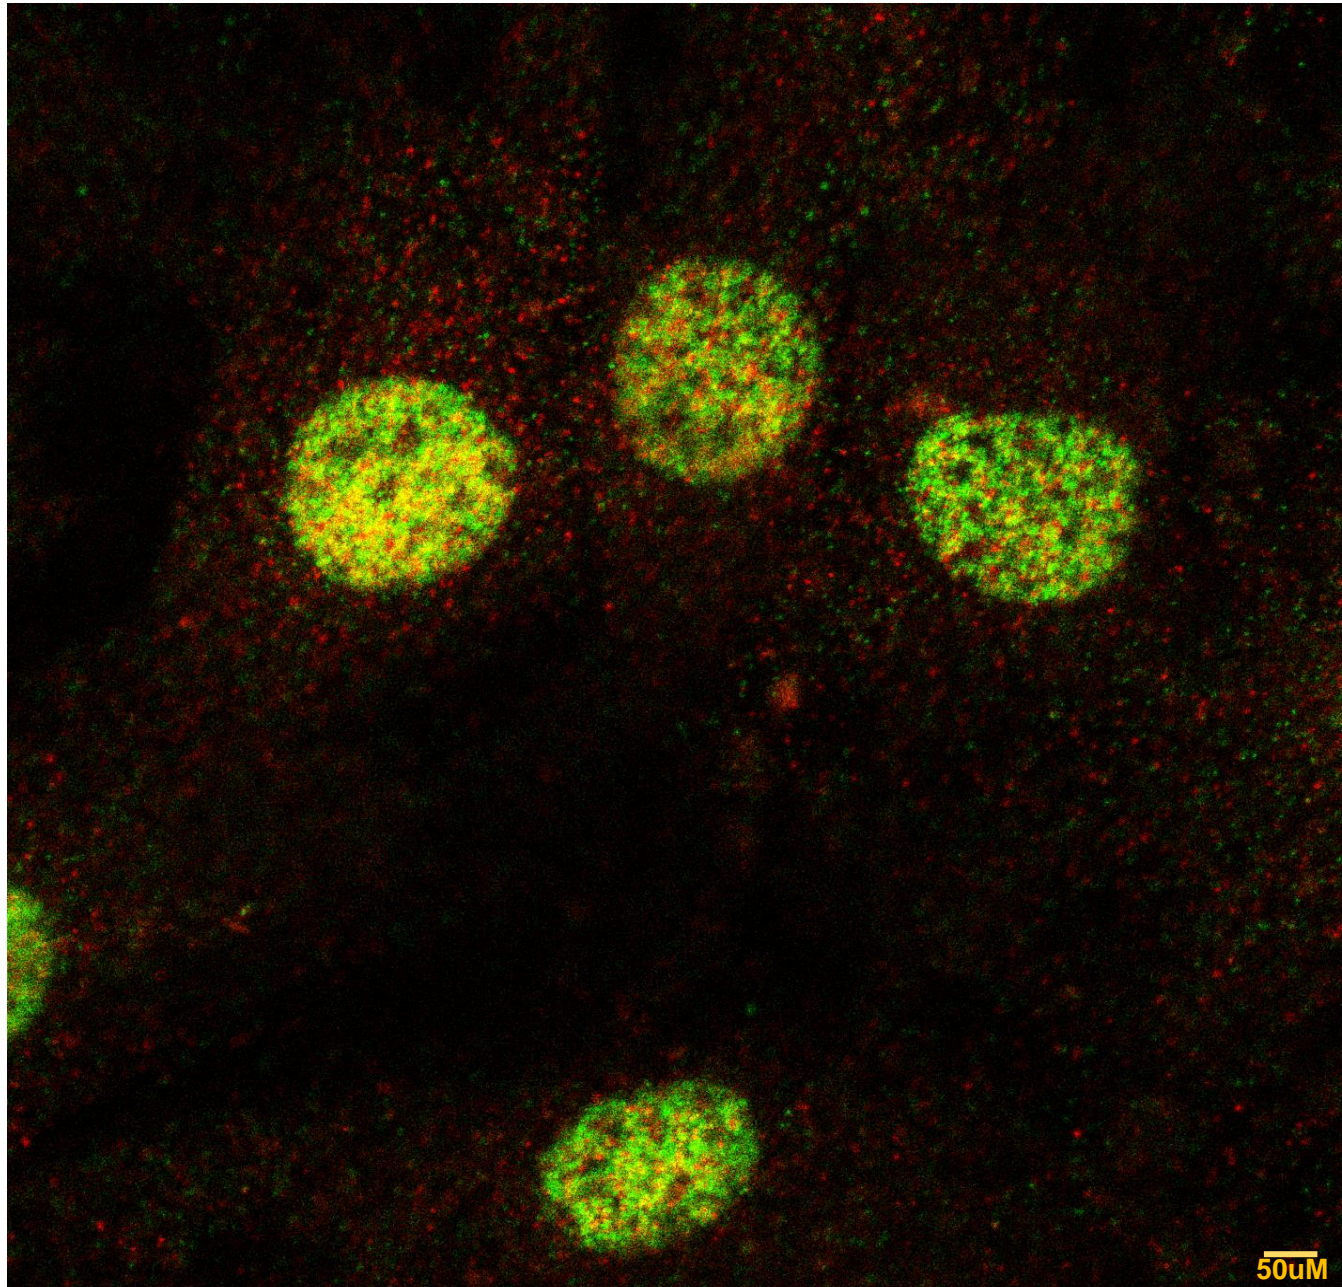

AM + RAP KD

MERGED

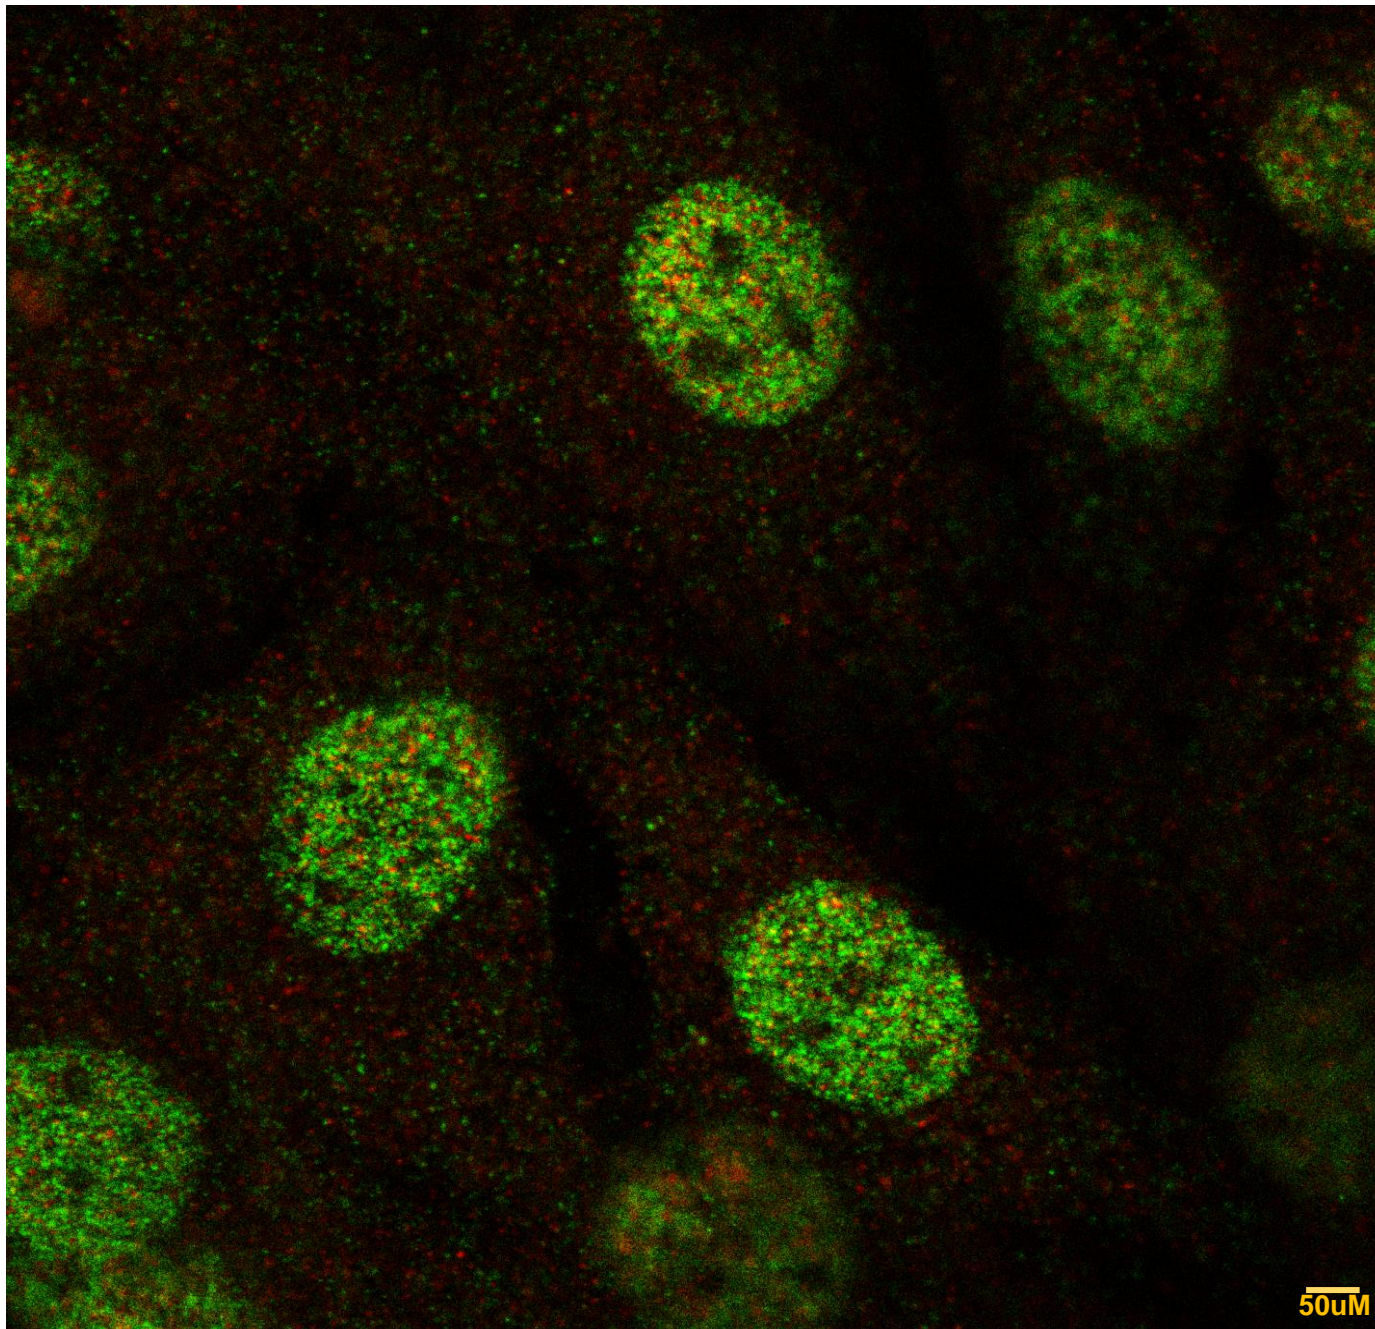

UND

MERGED + DAPI

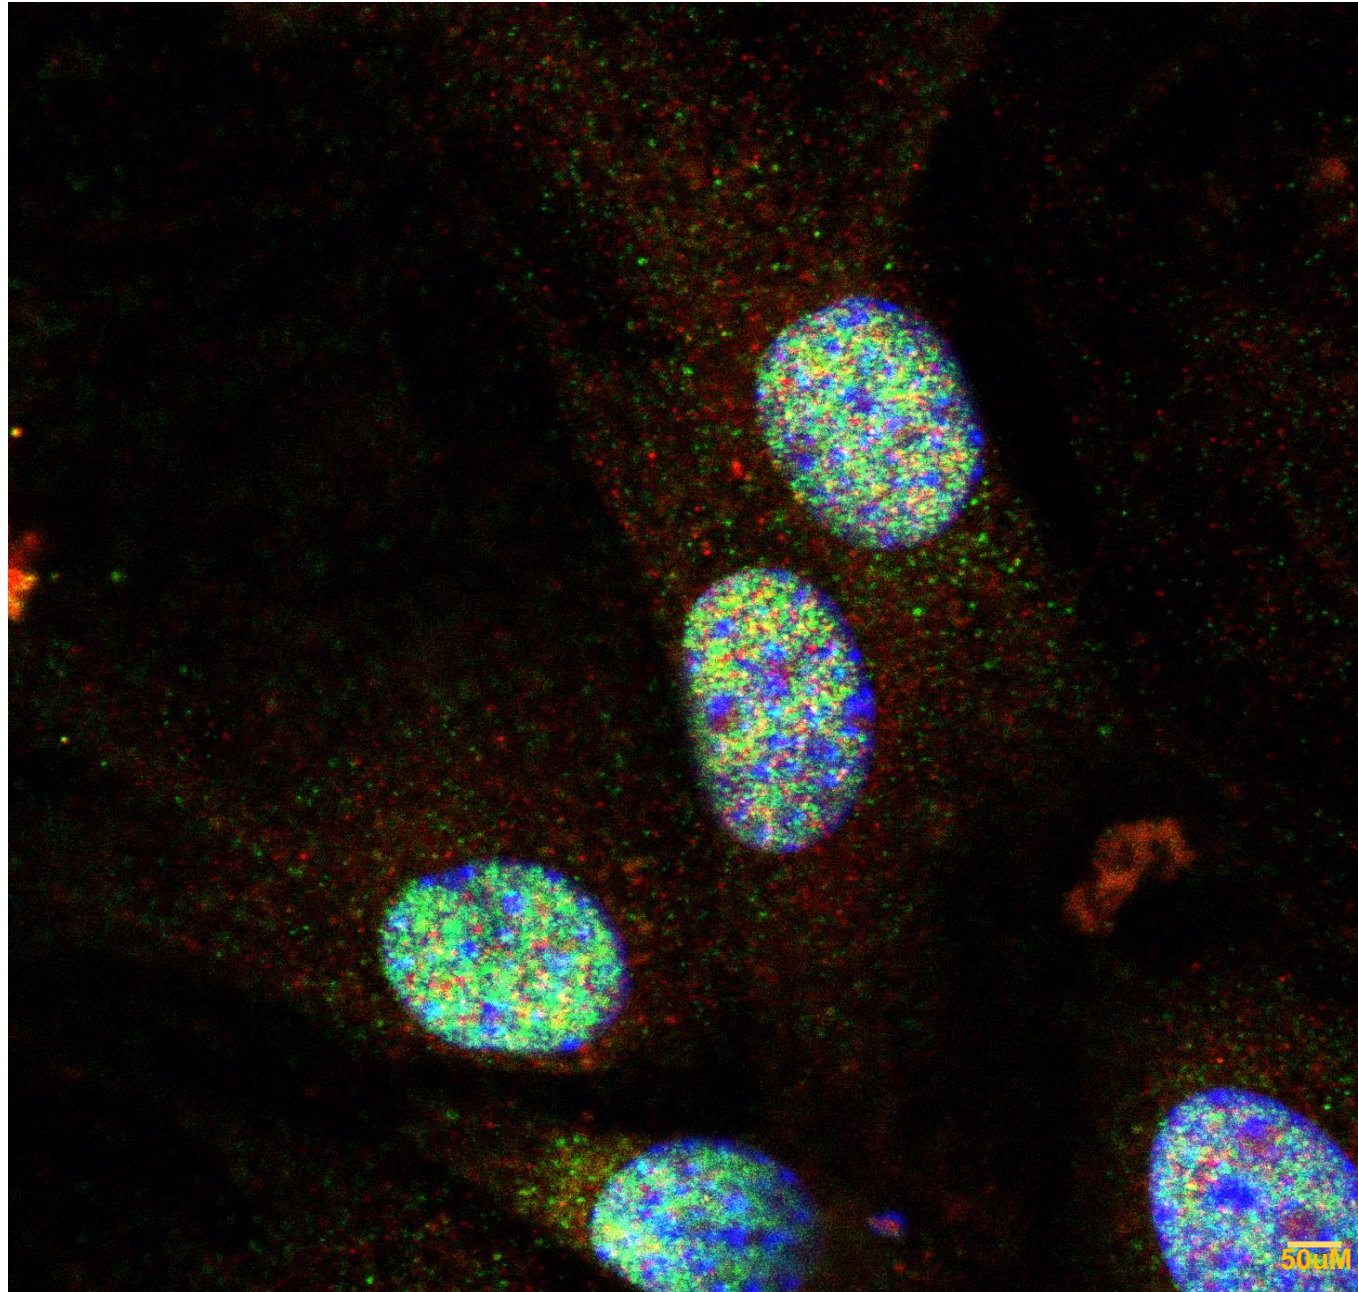

AM + Scr    MERGED + DAPI

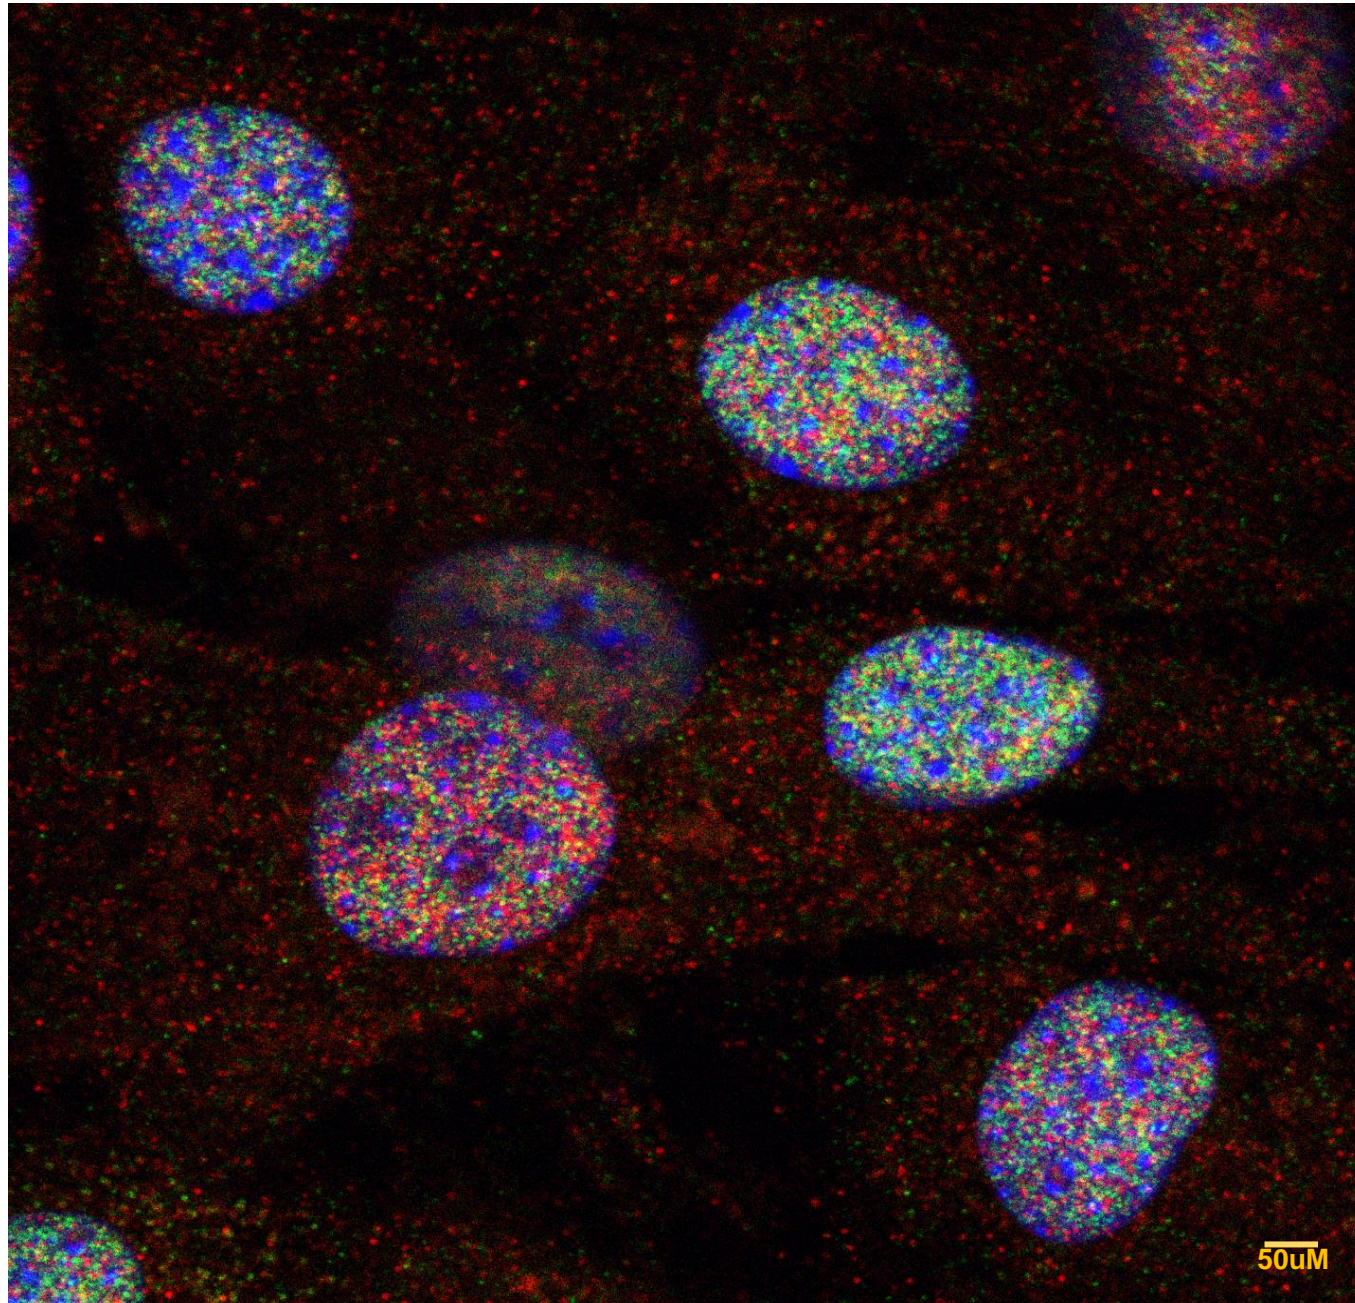



AM + RIC KD MERGED + DAPI

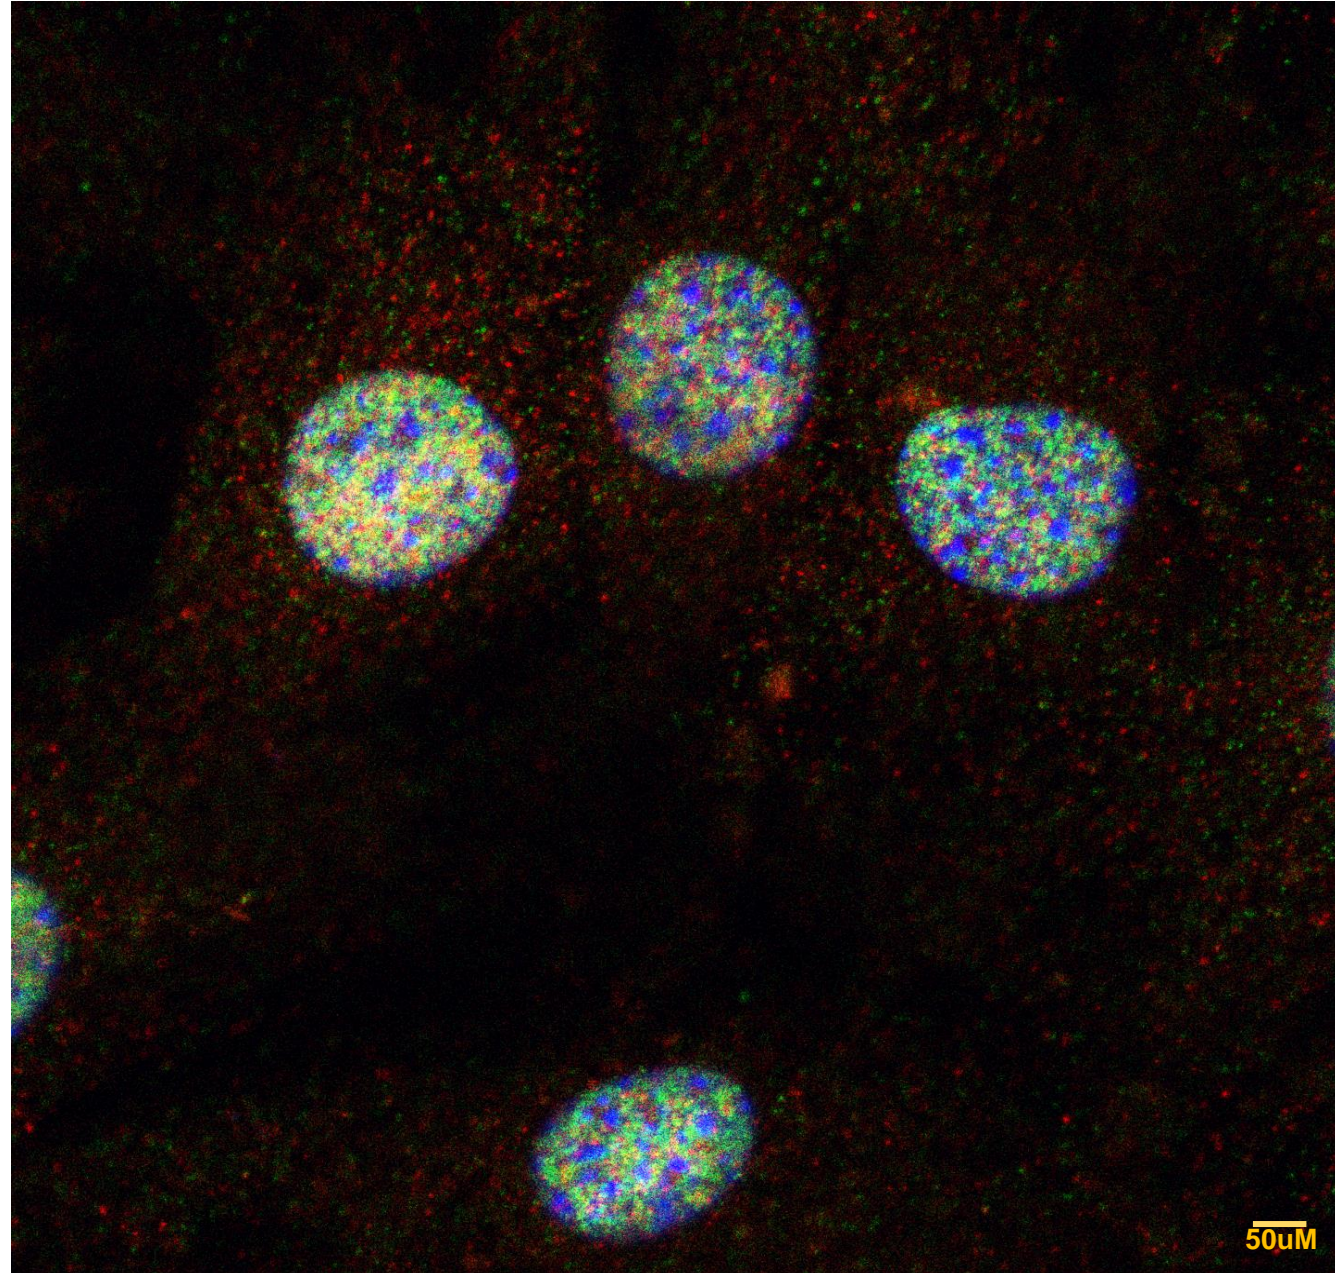

AM + RAP KD MERGED + DAPI

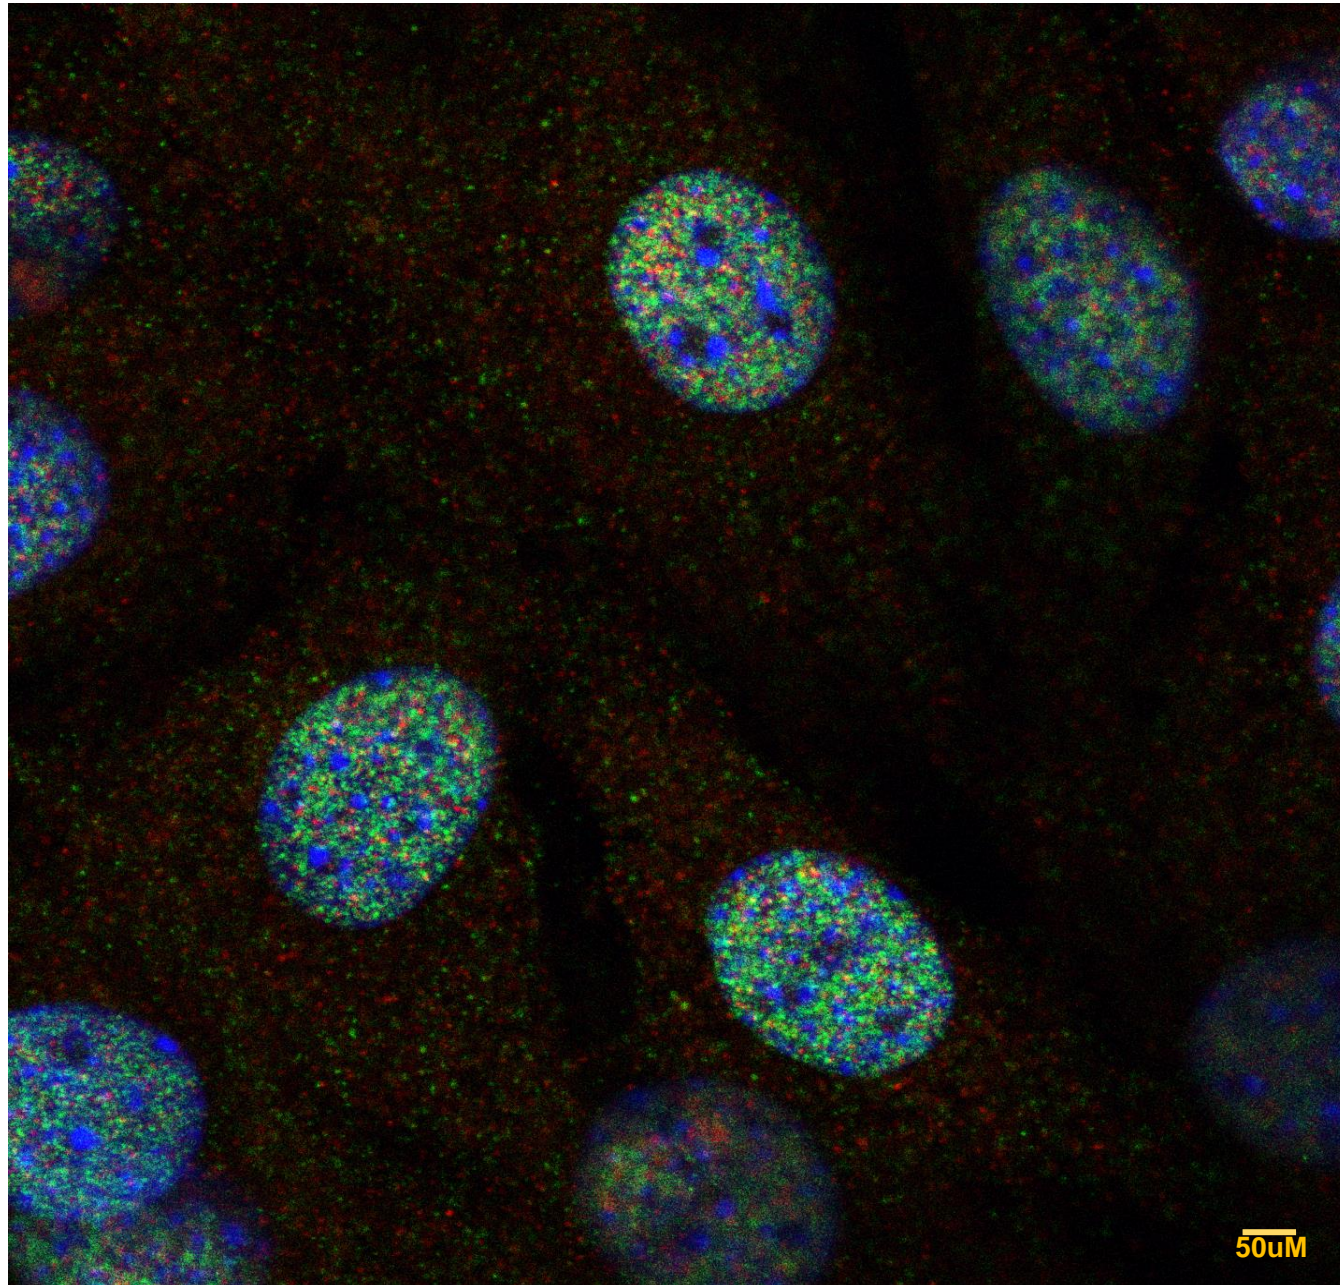

Fig.3 C)  
D-0

AM + Scr

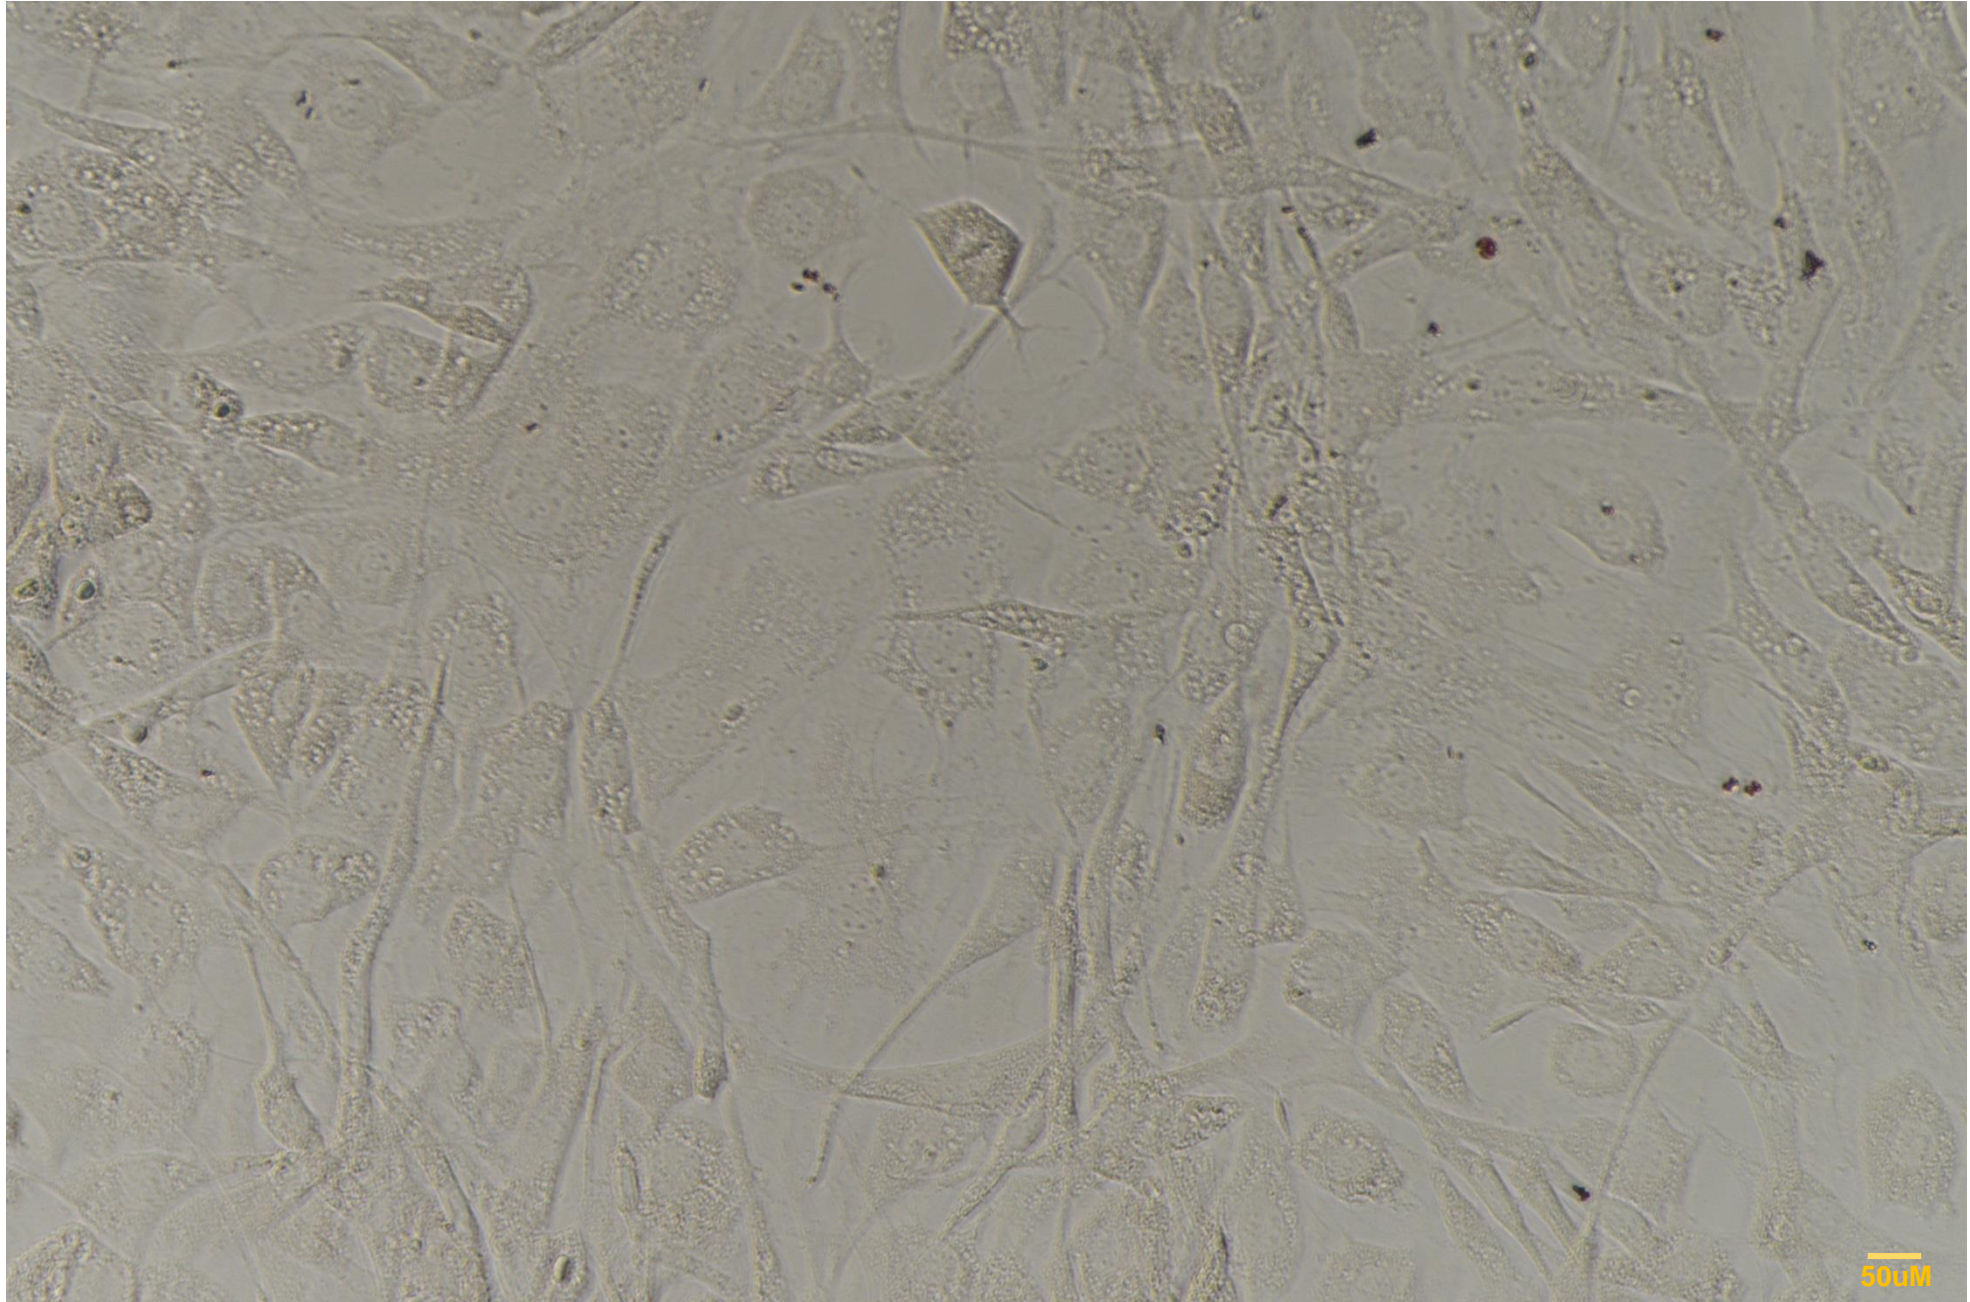

D-8

AM + Scr

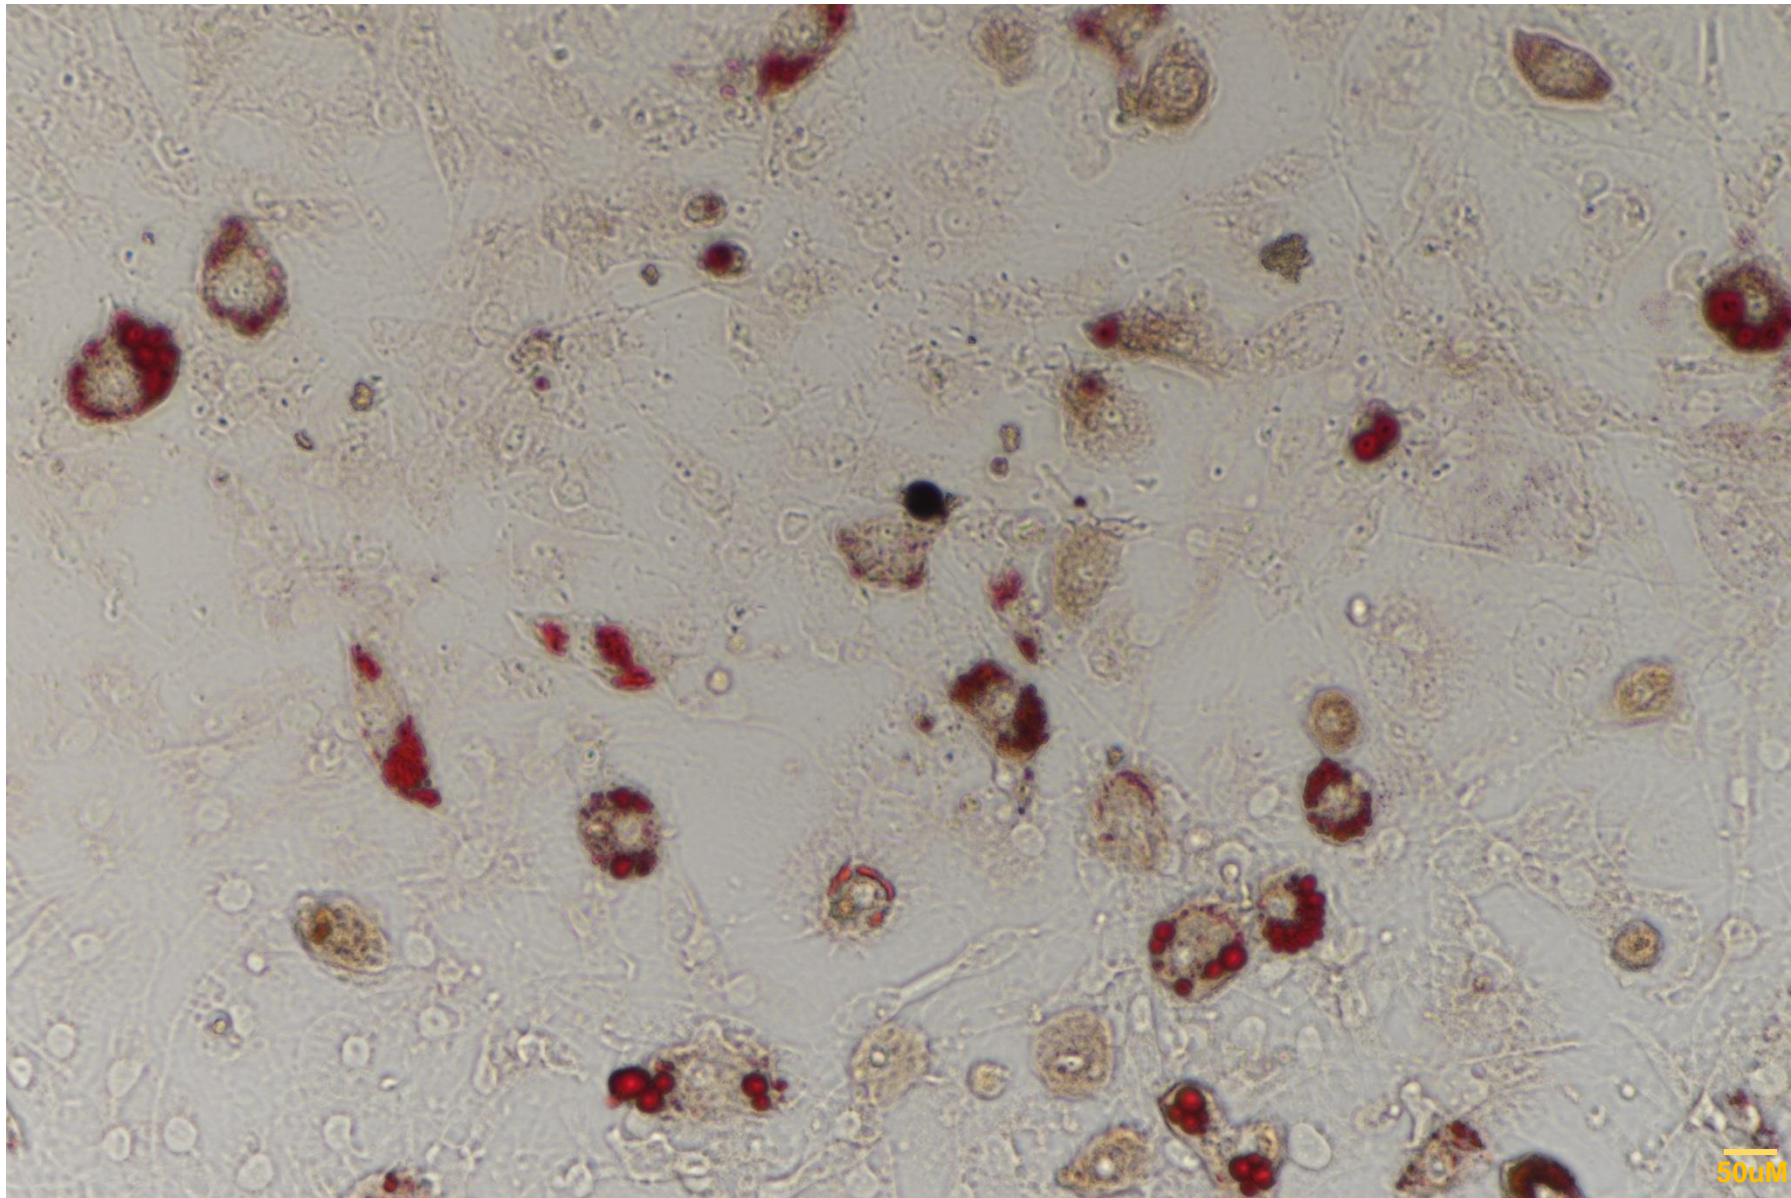

**D-0 AM + Scr + LiCl**

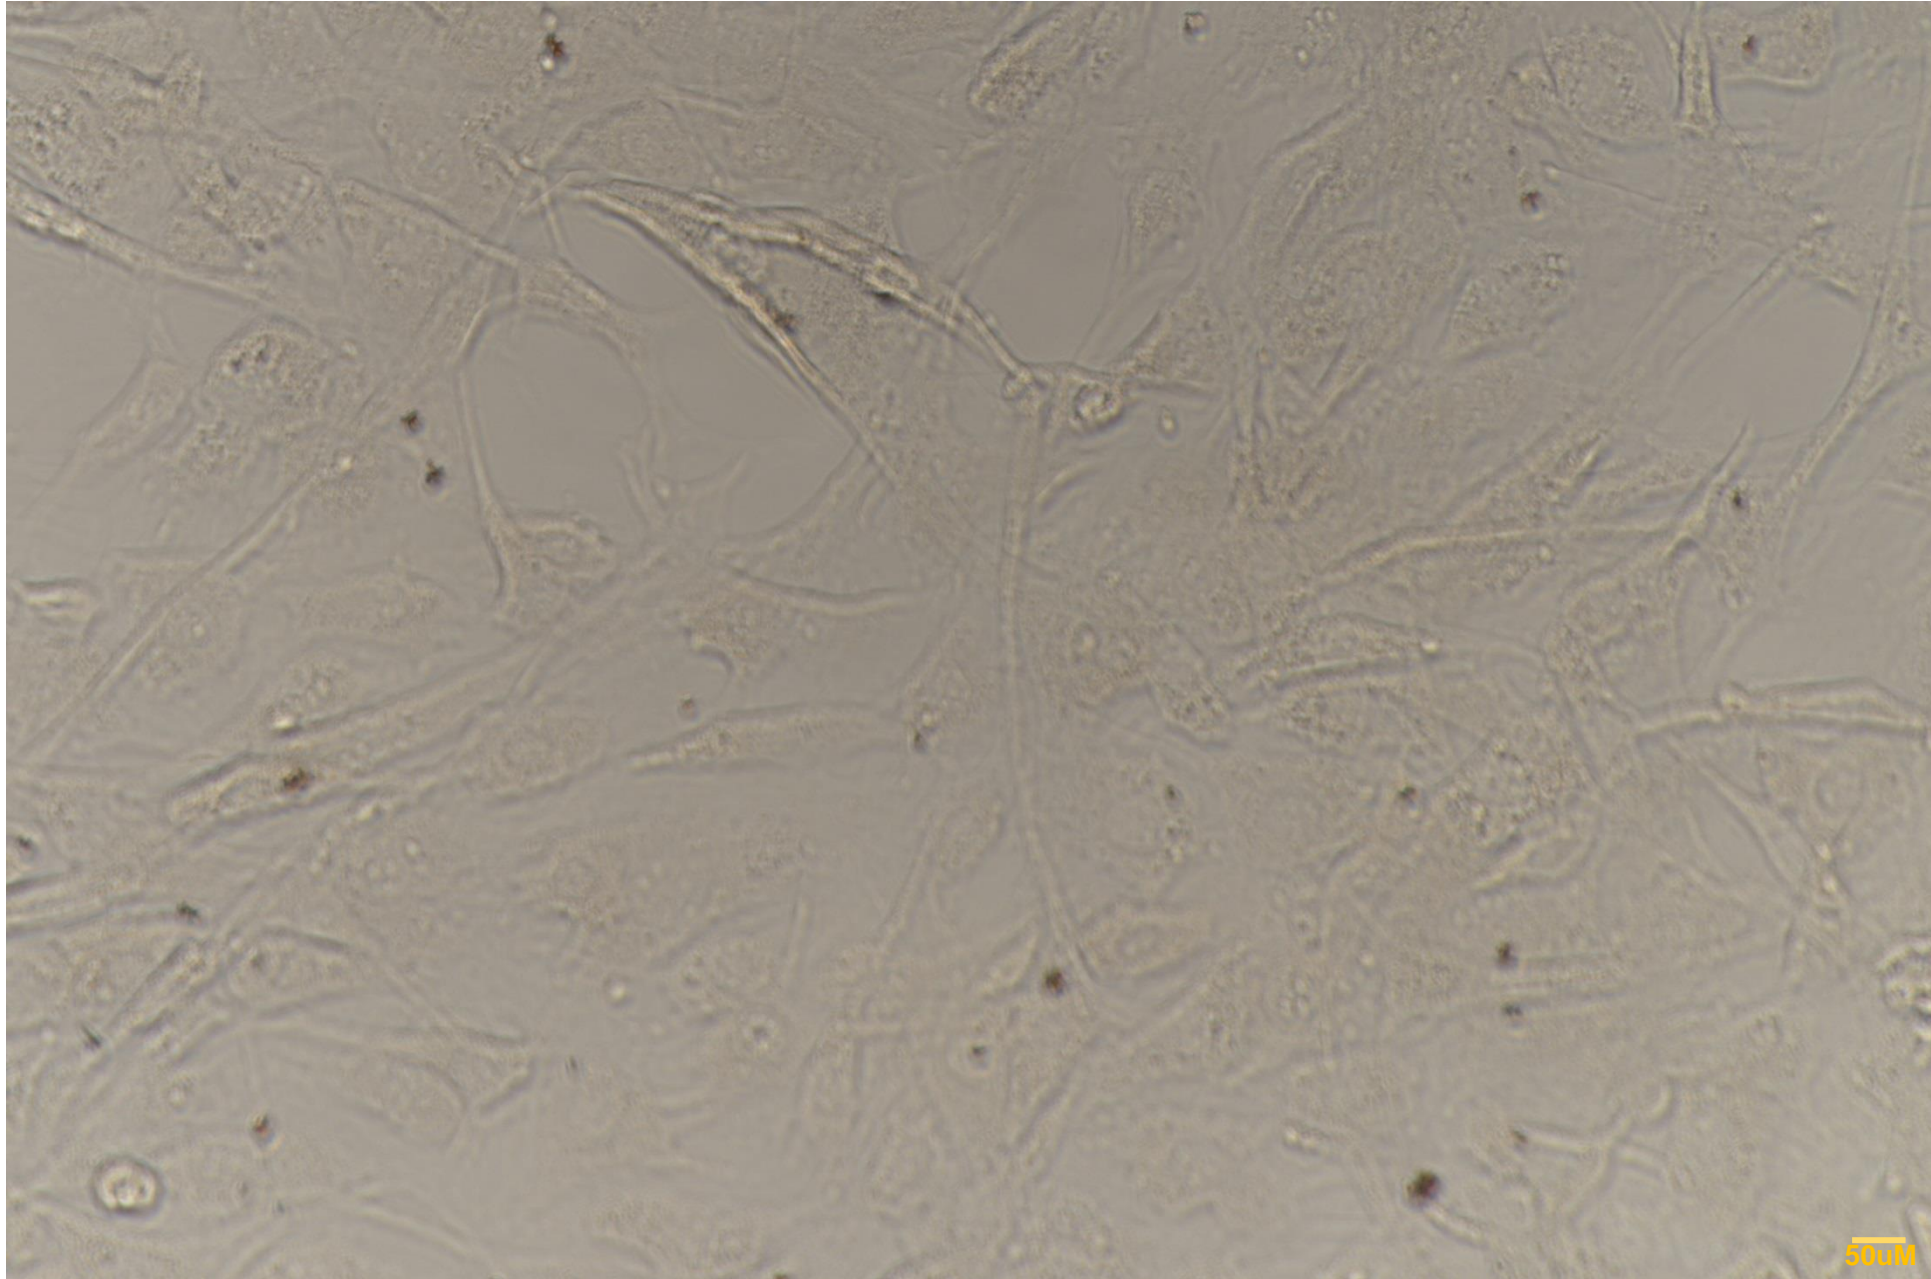

**D-8 AM + Scr + LiCl**

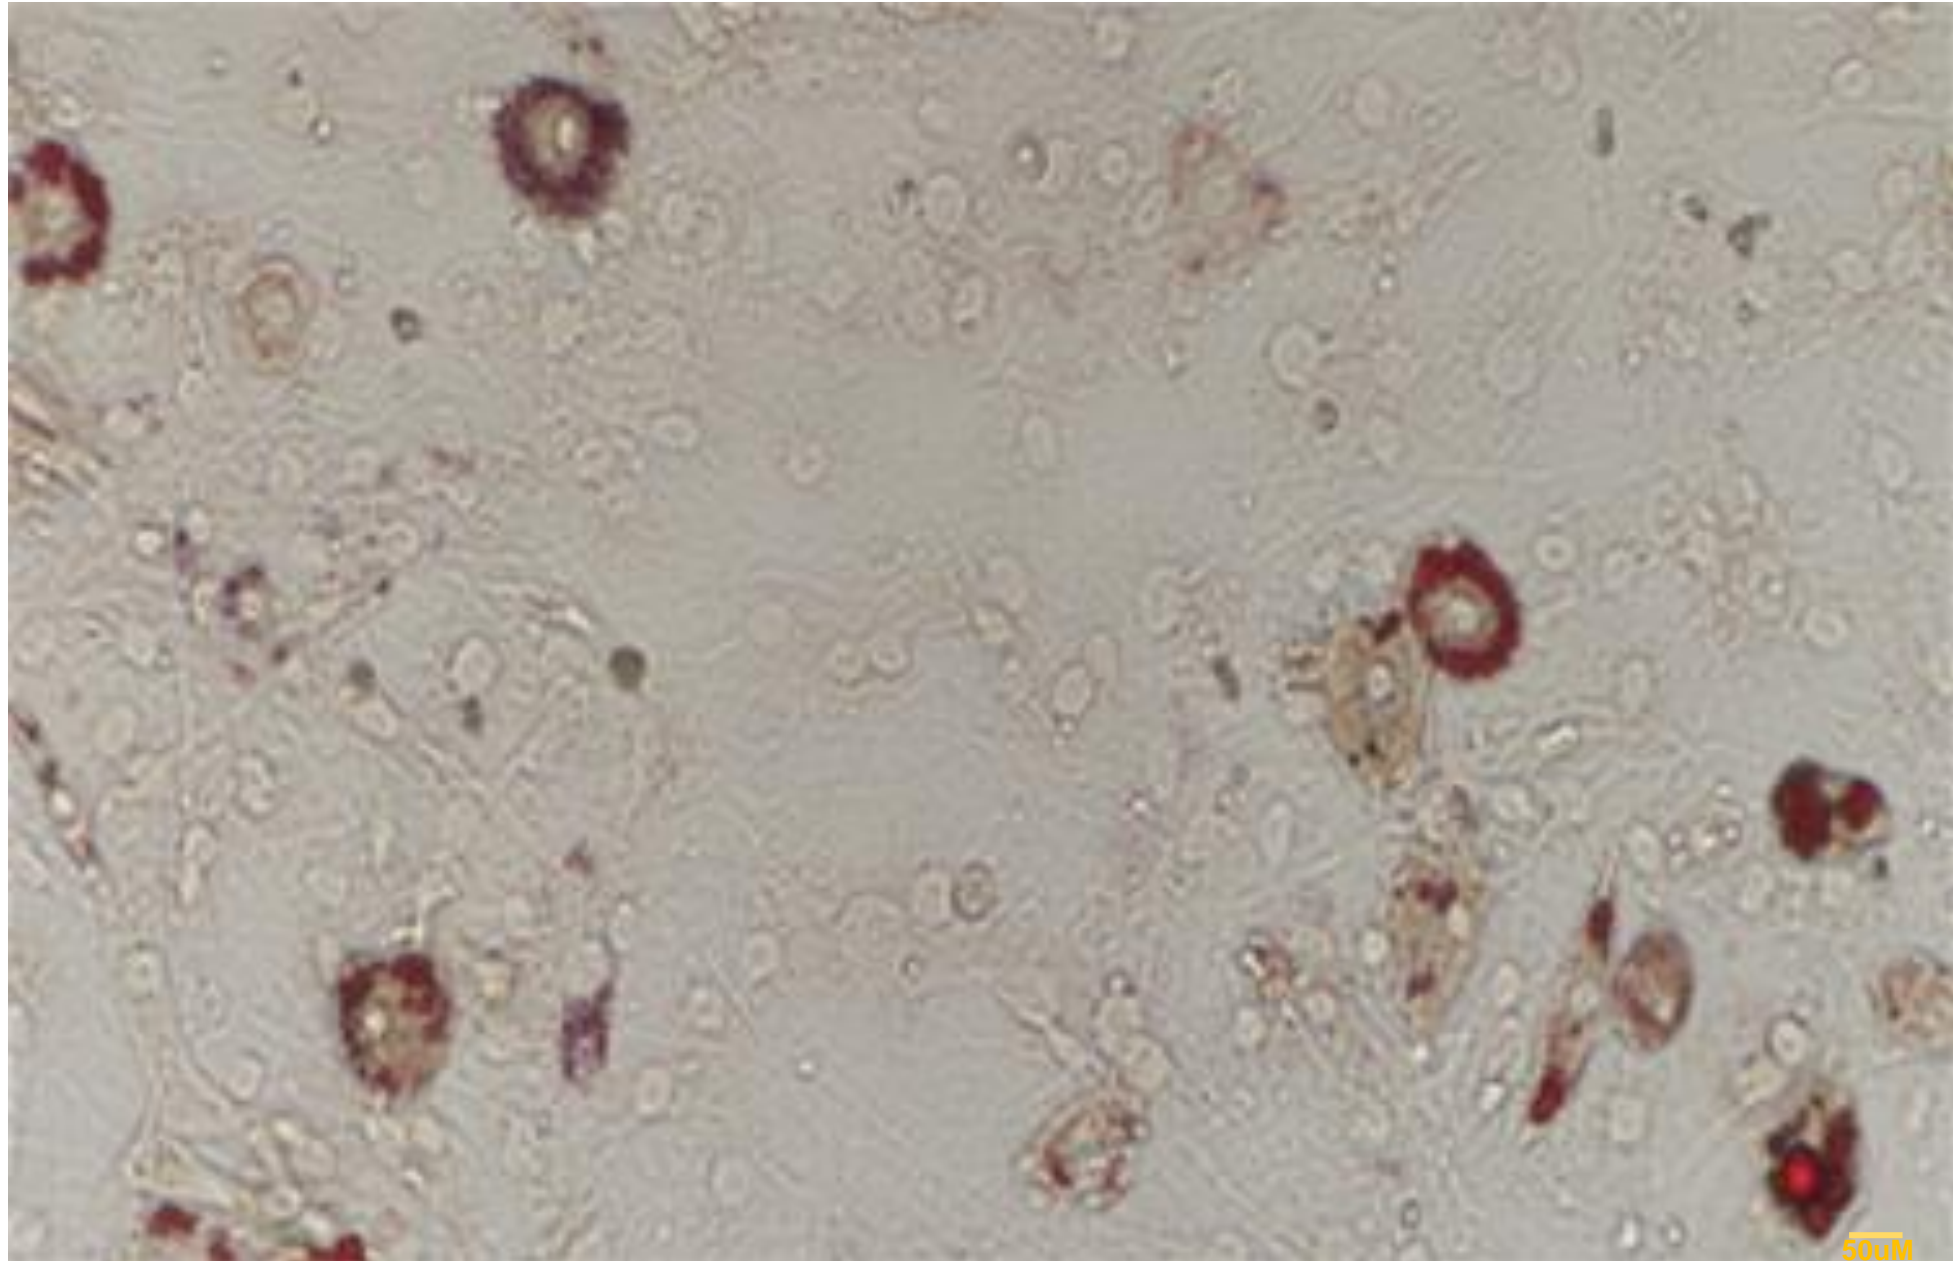

**D-0 AM + RIC KD**

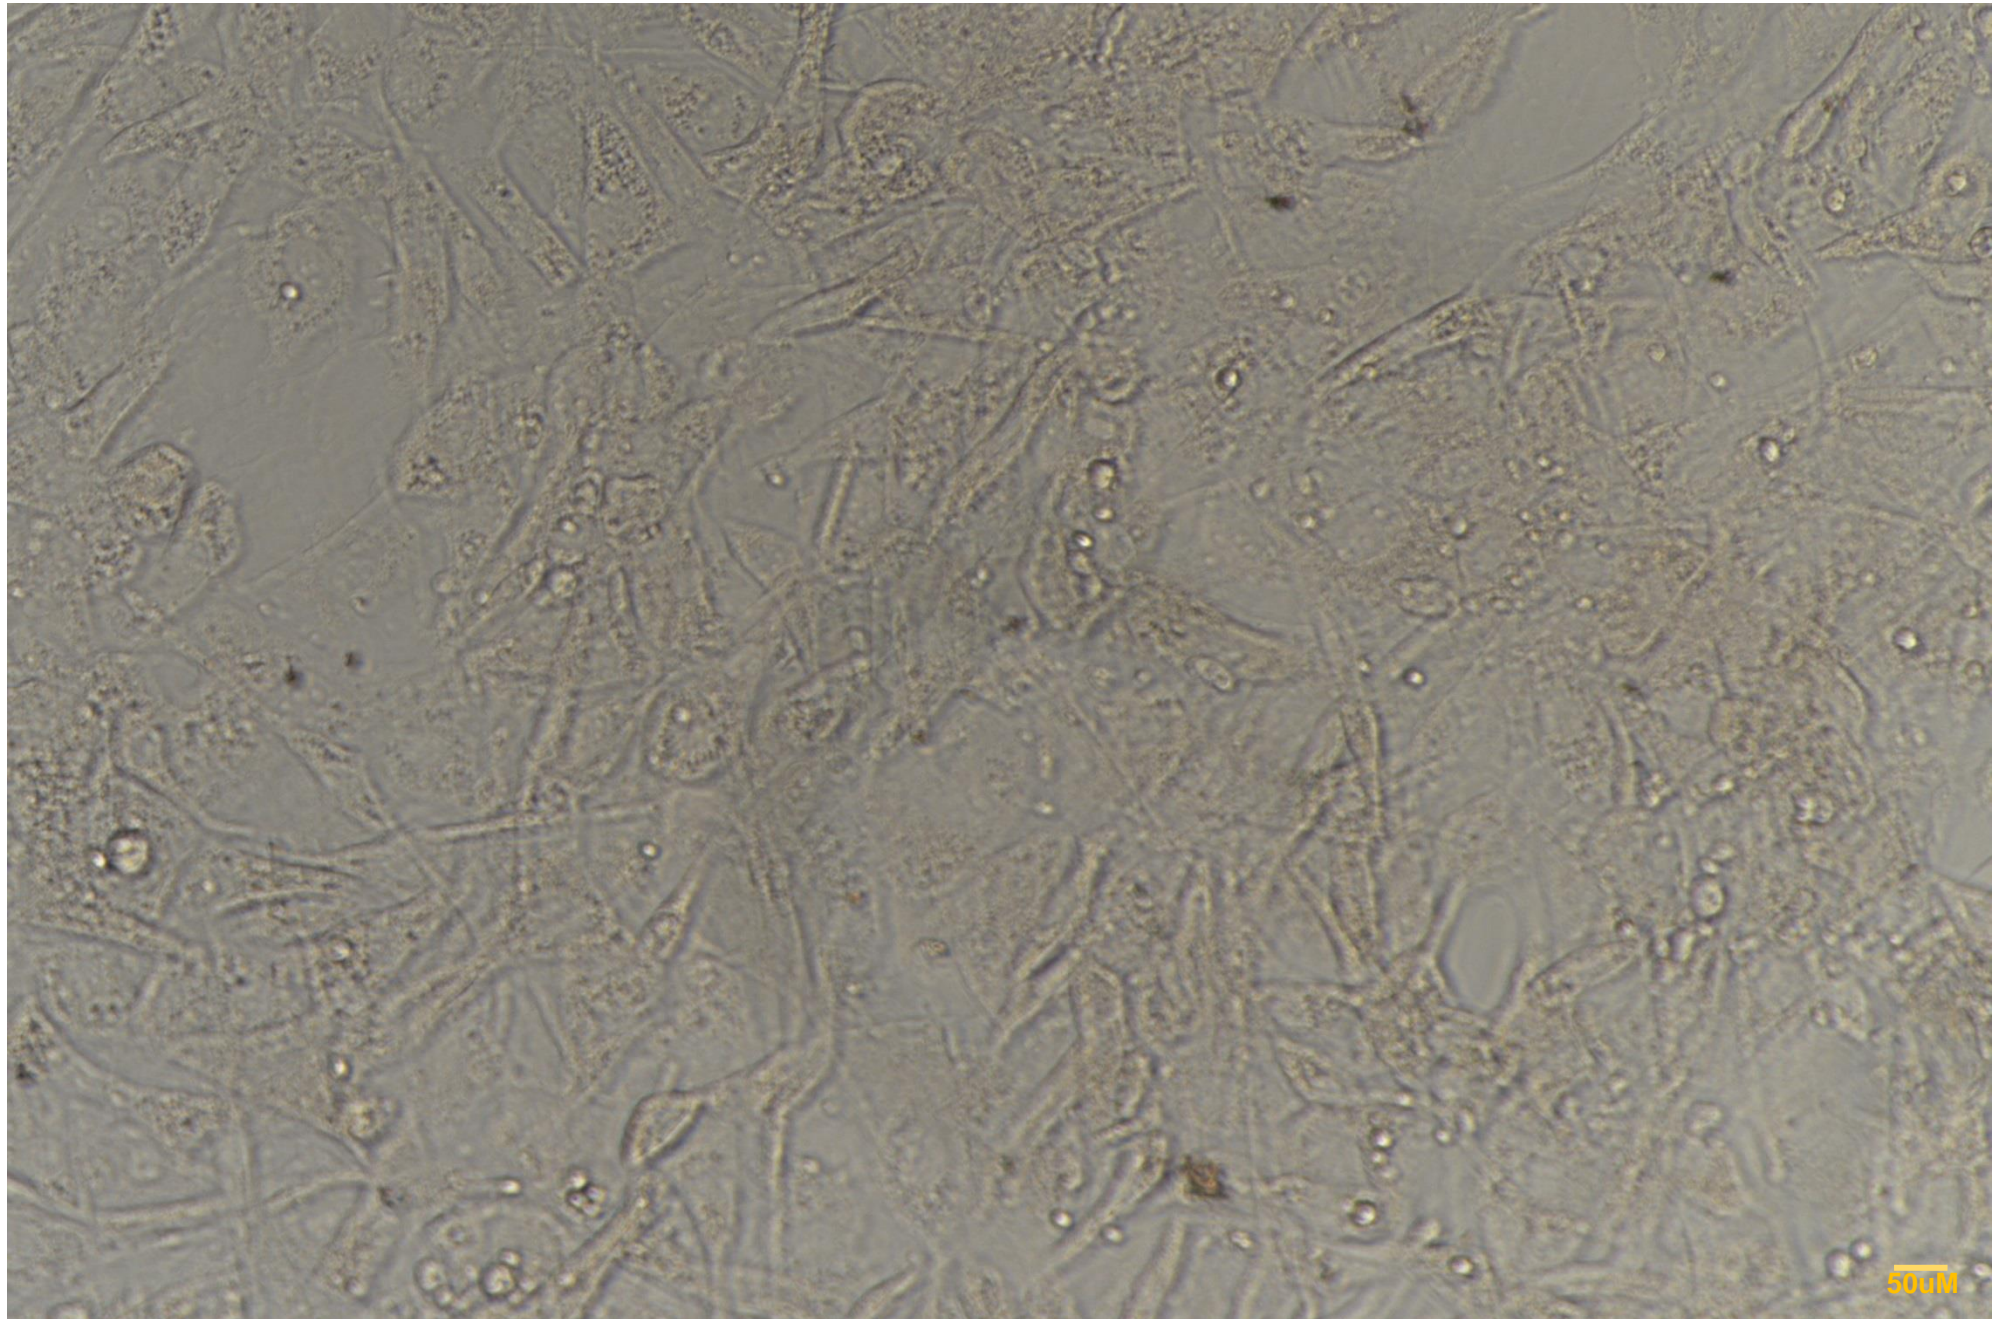

**D-8 AM + RIC KD**

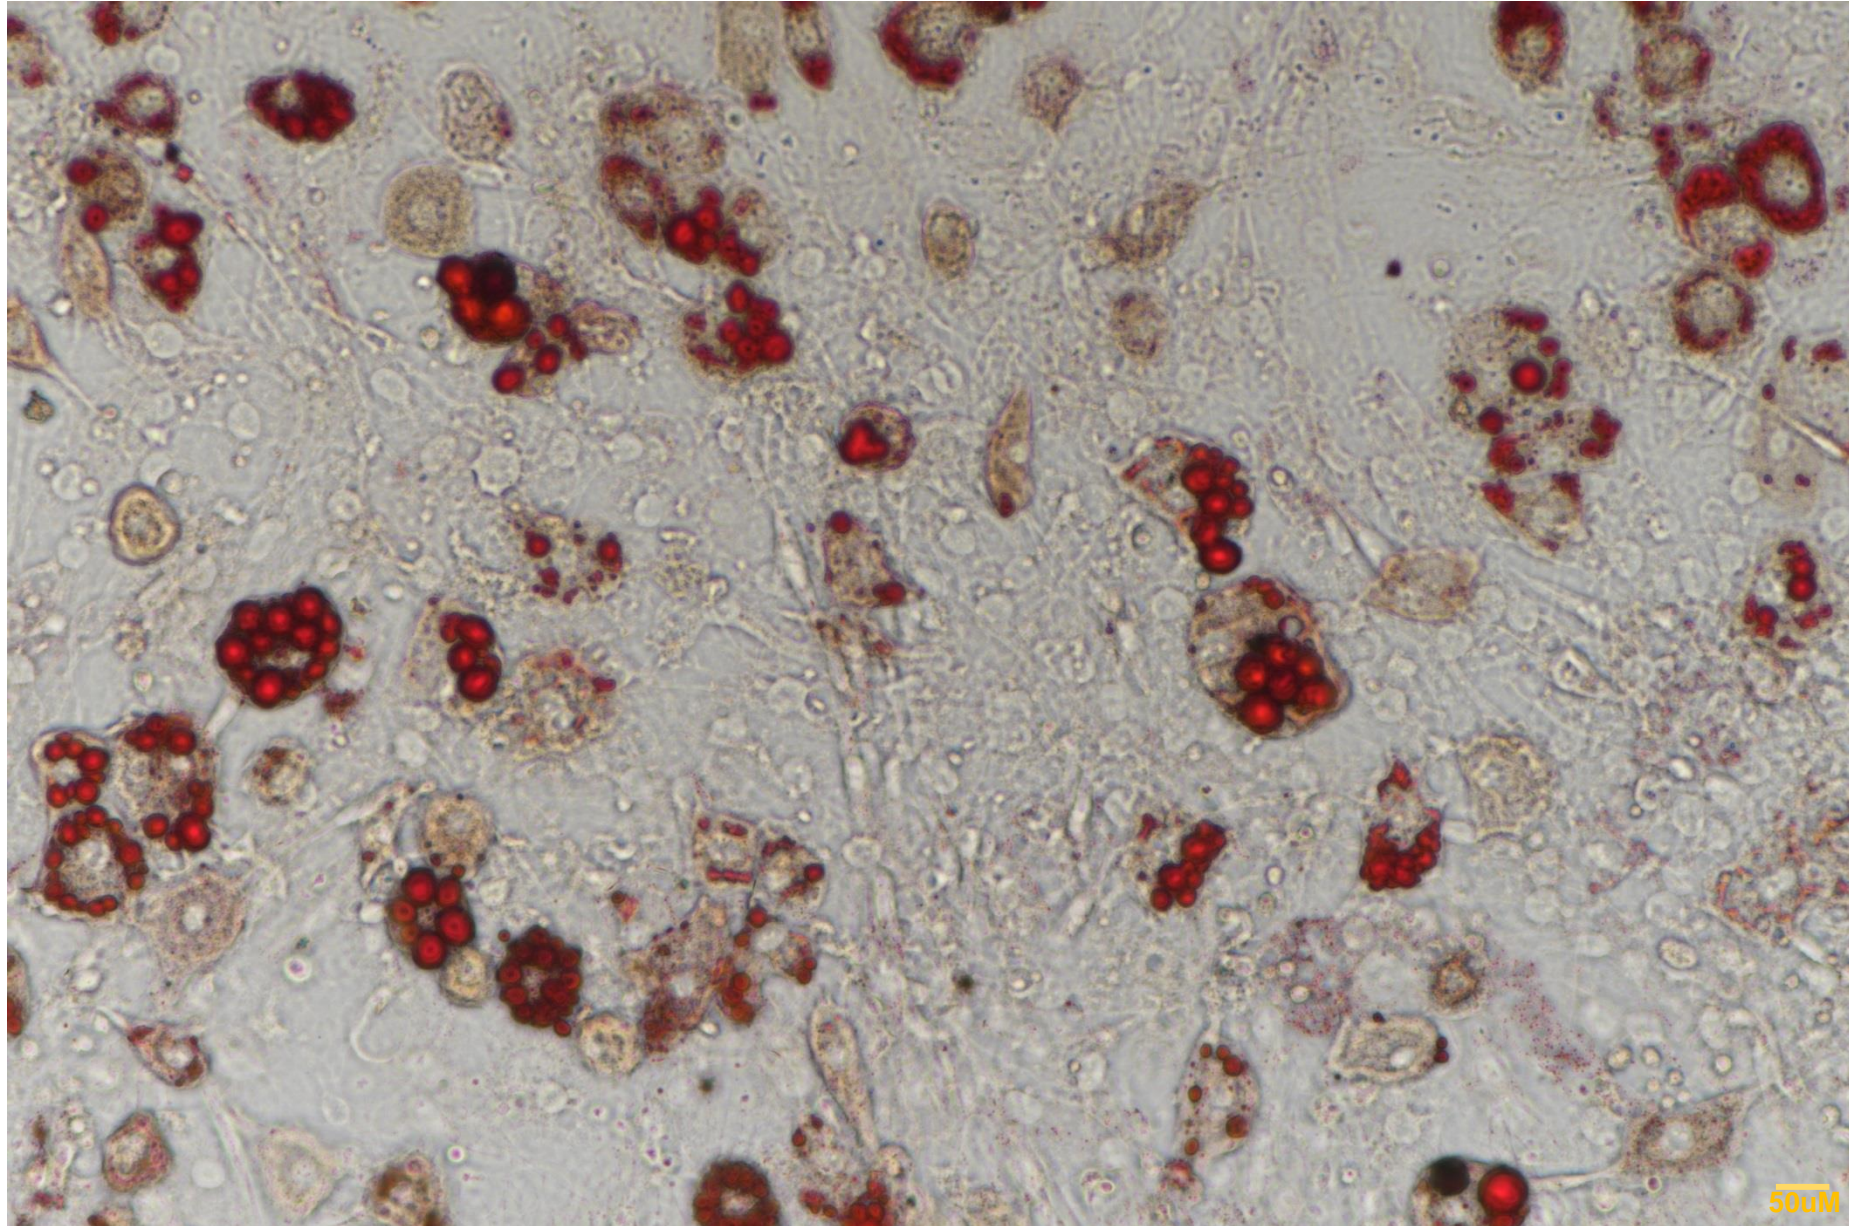



**D-0 AM + RIC KD + LiCl**

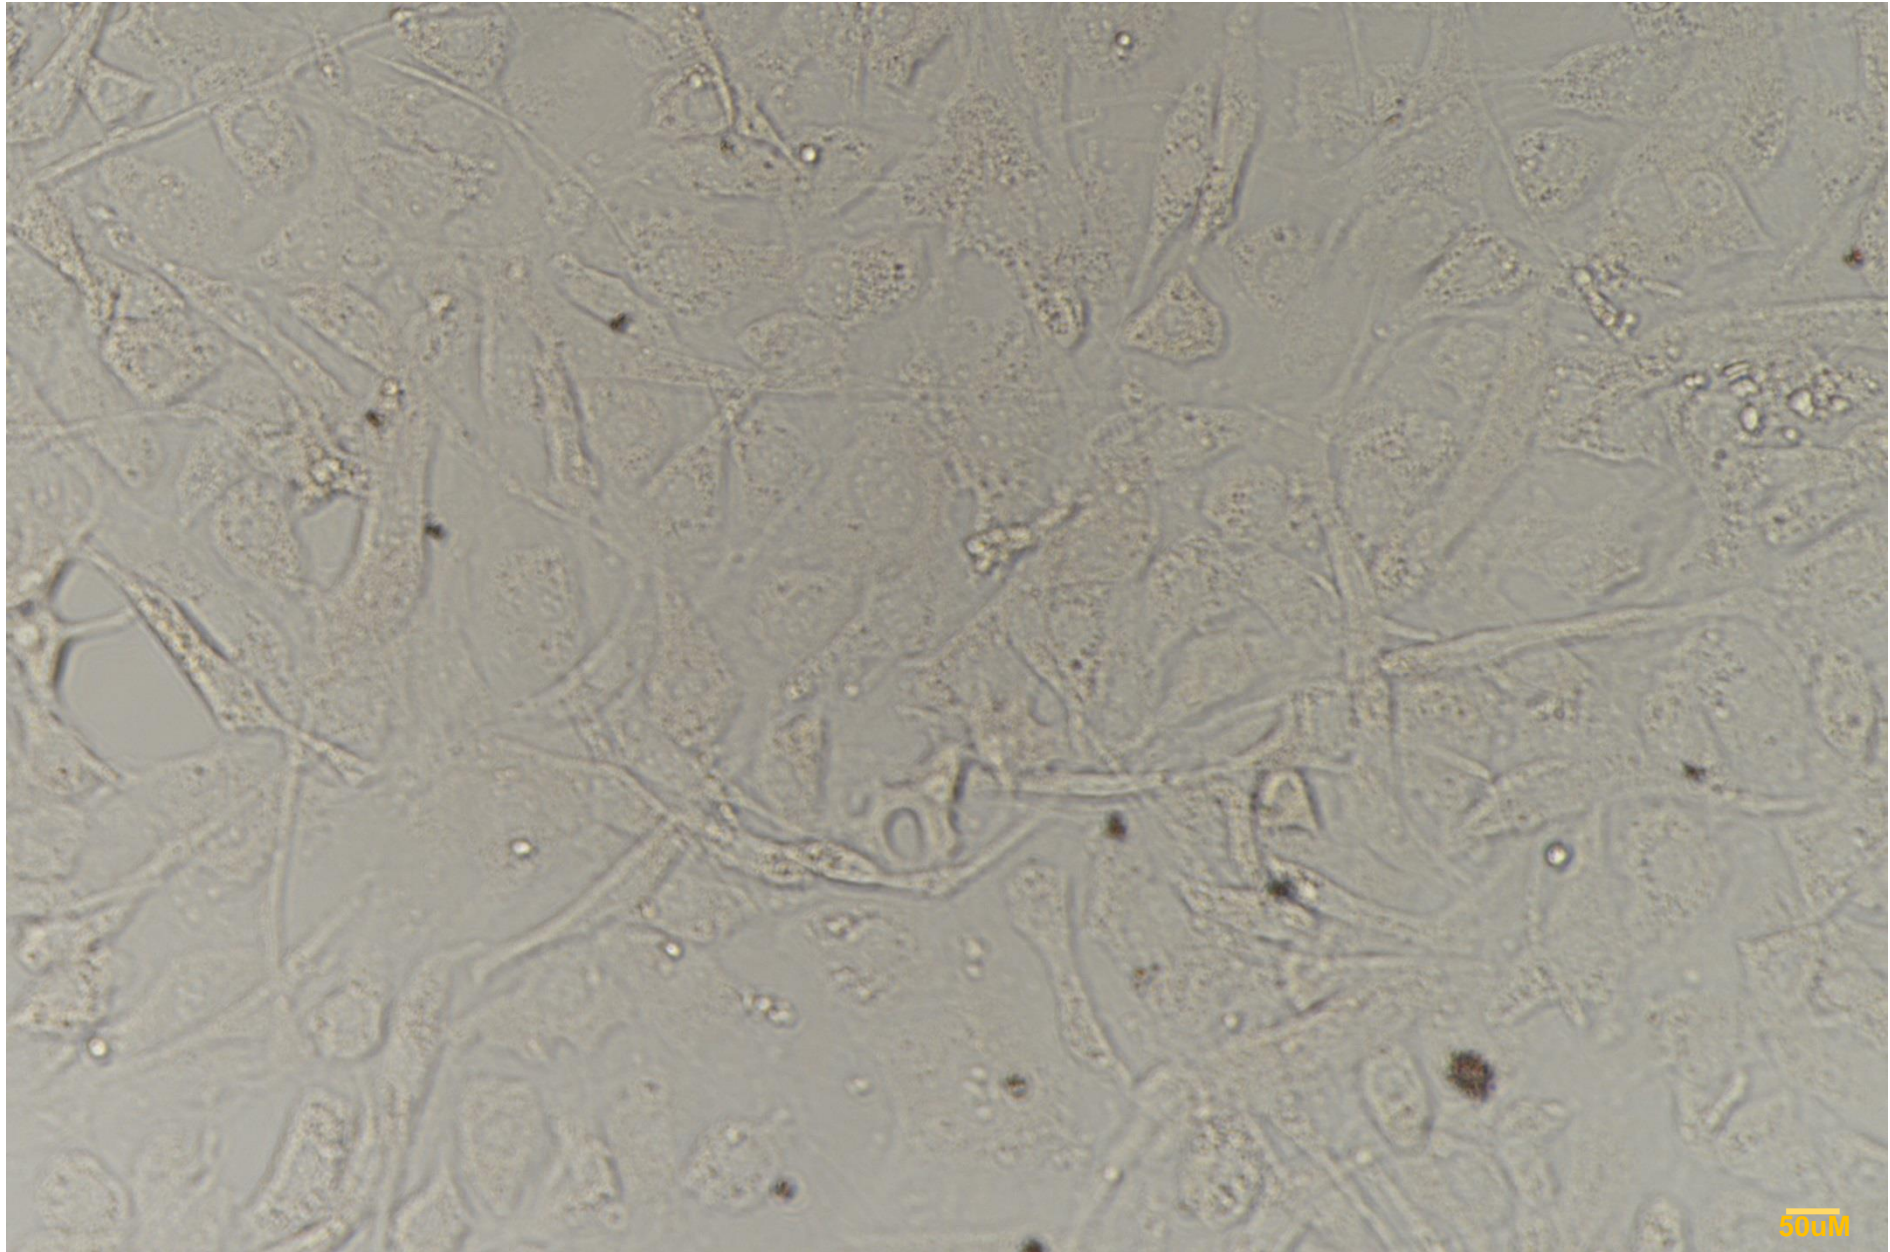

**D-8 AM + RIC KD + LiCl**

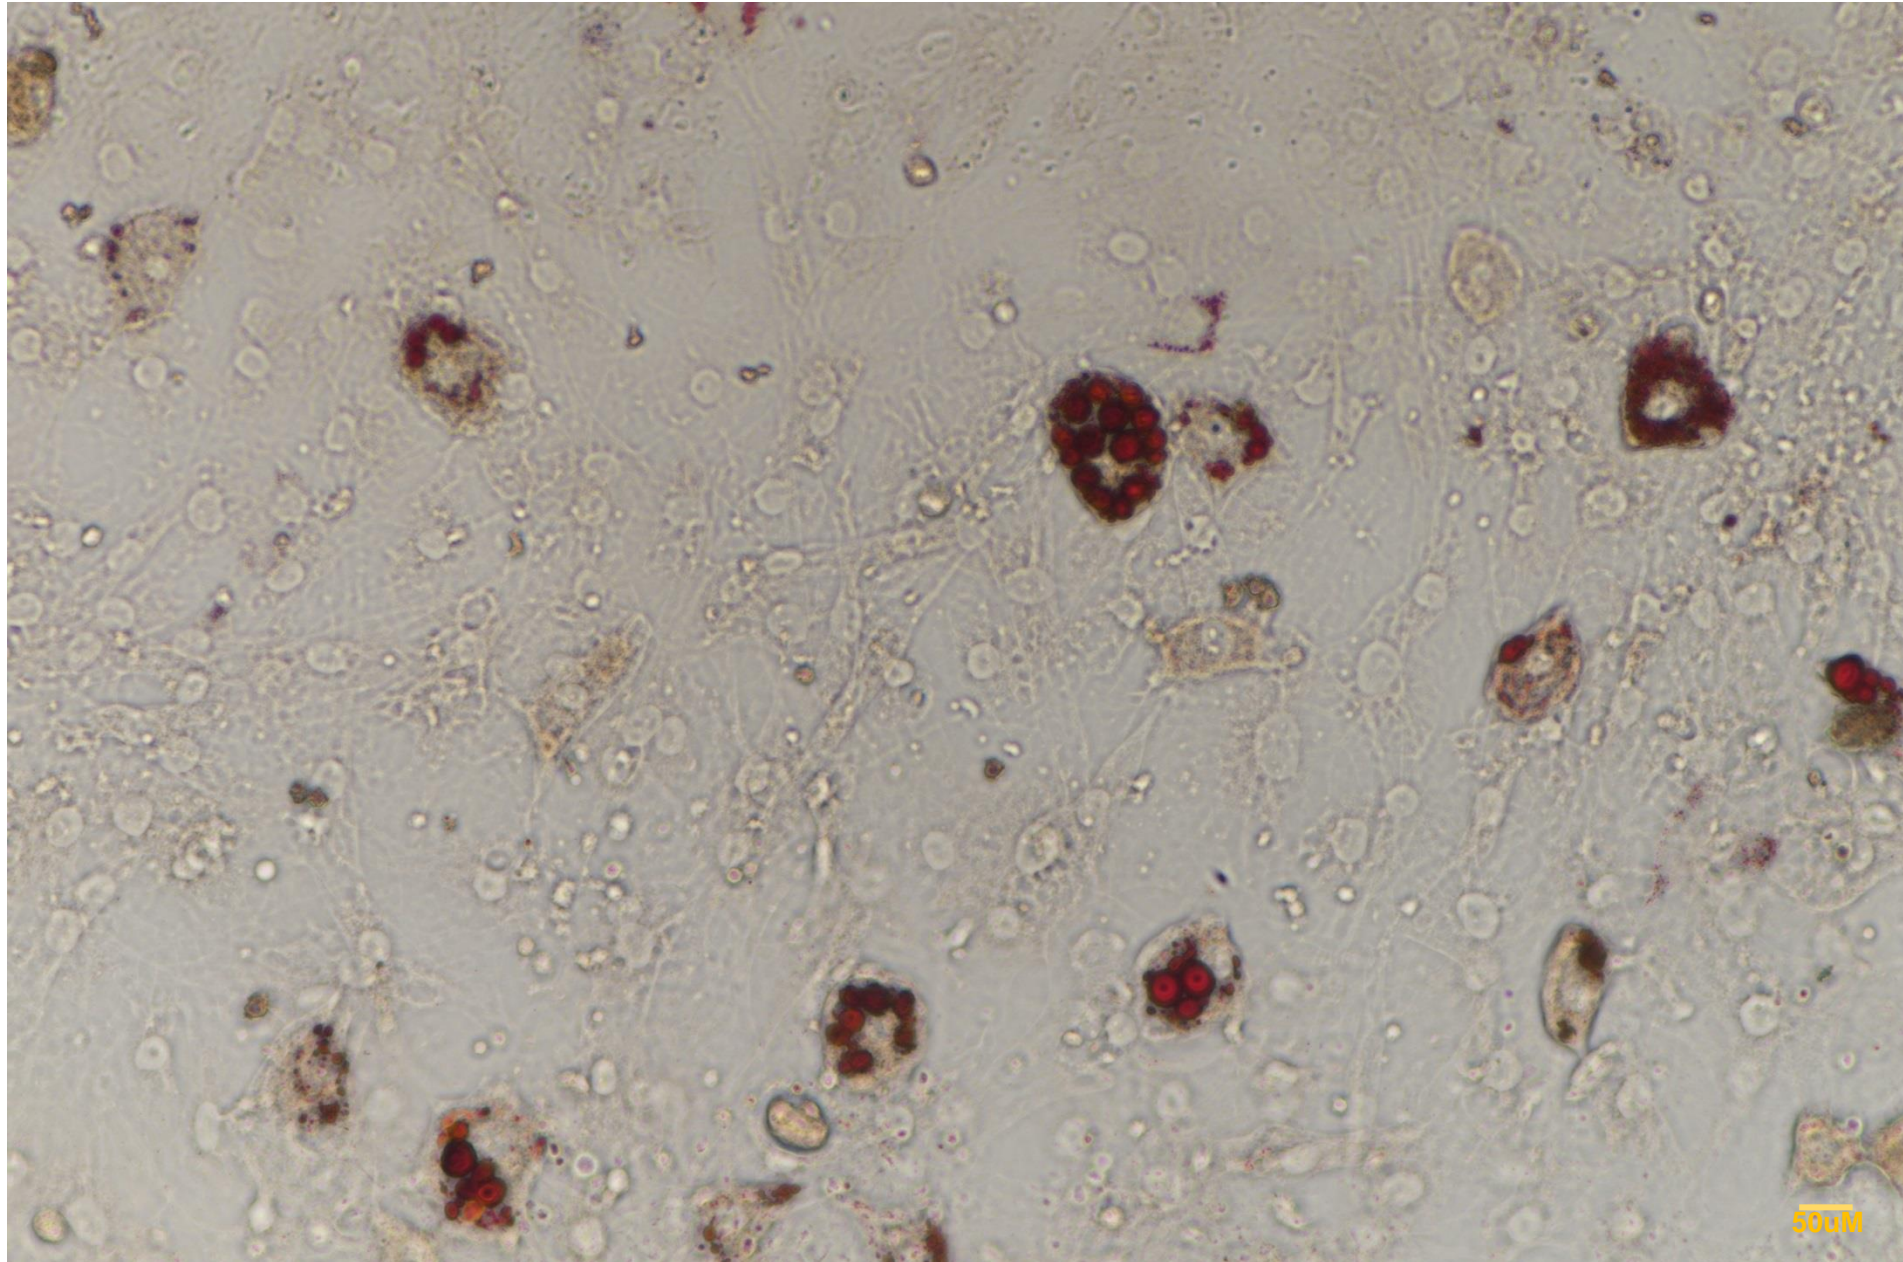

Fig.4 D)

D-0

AM

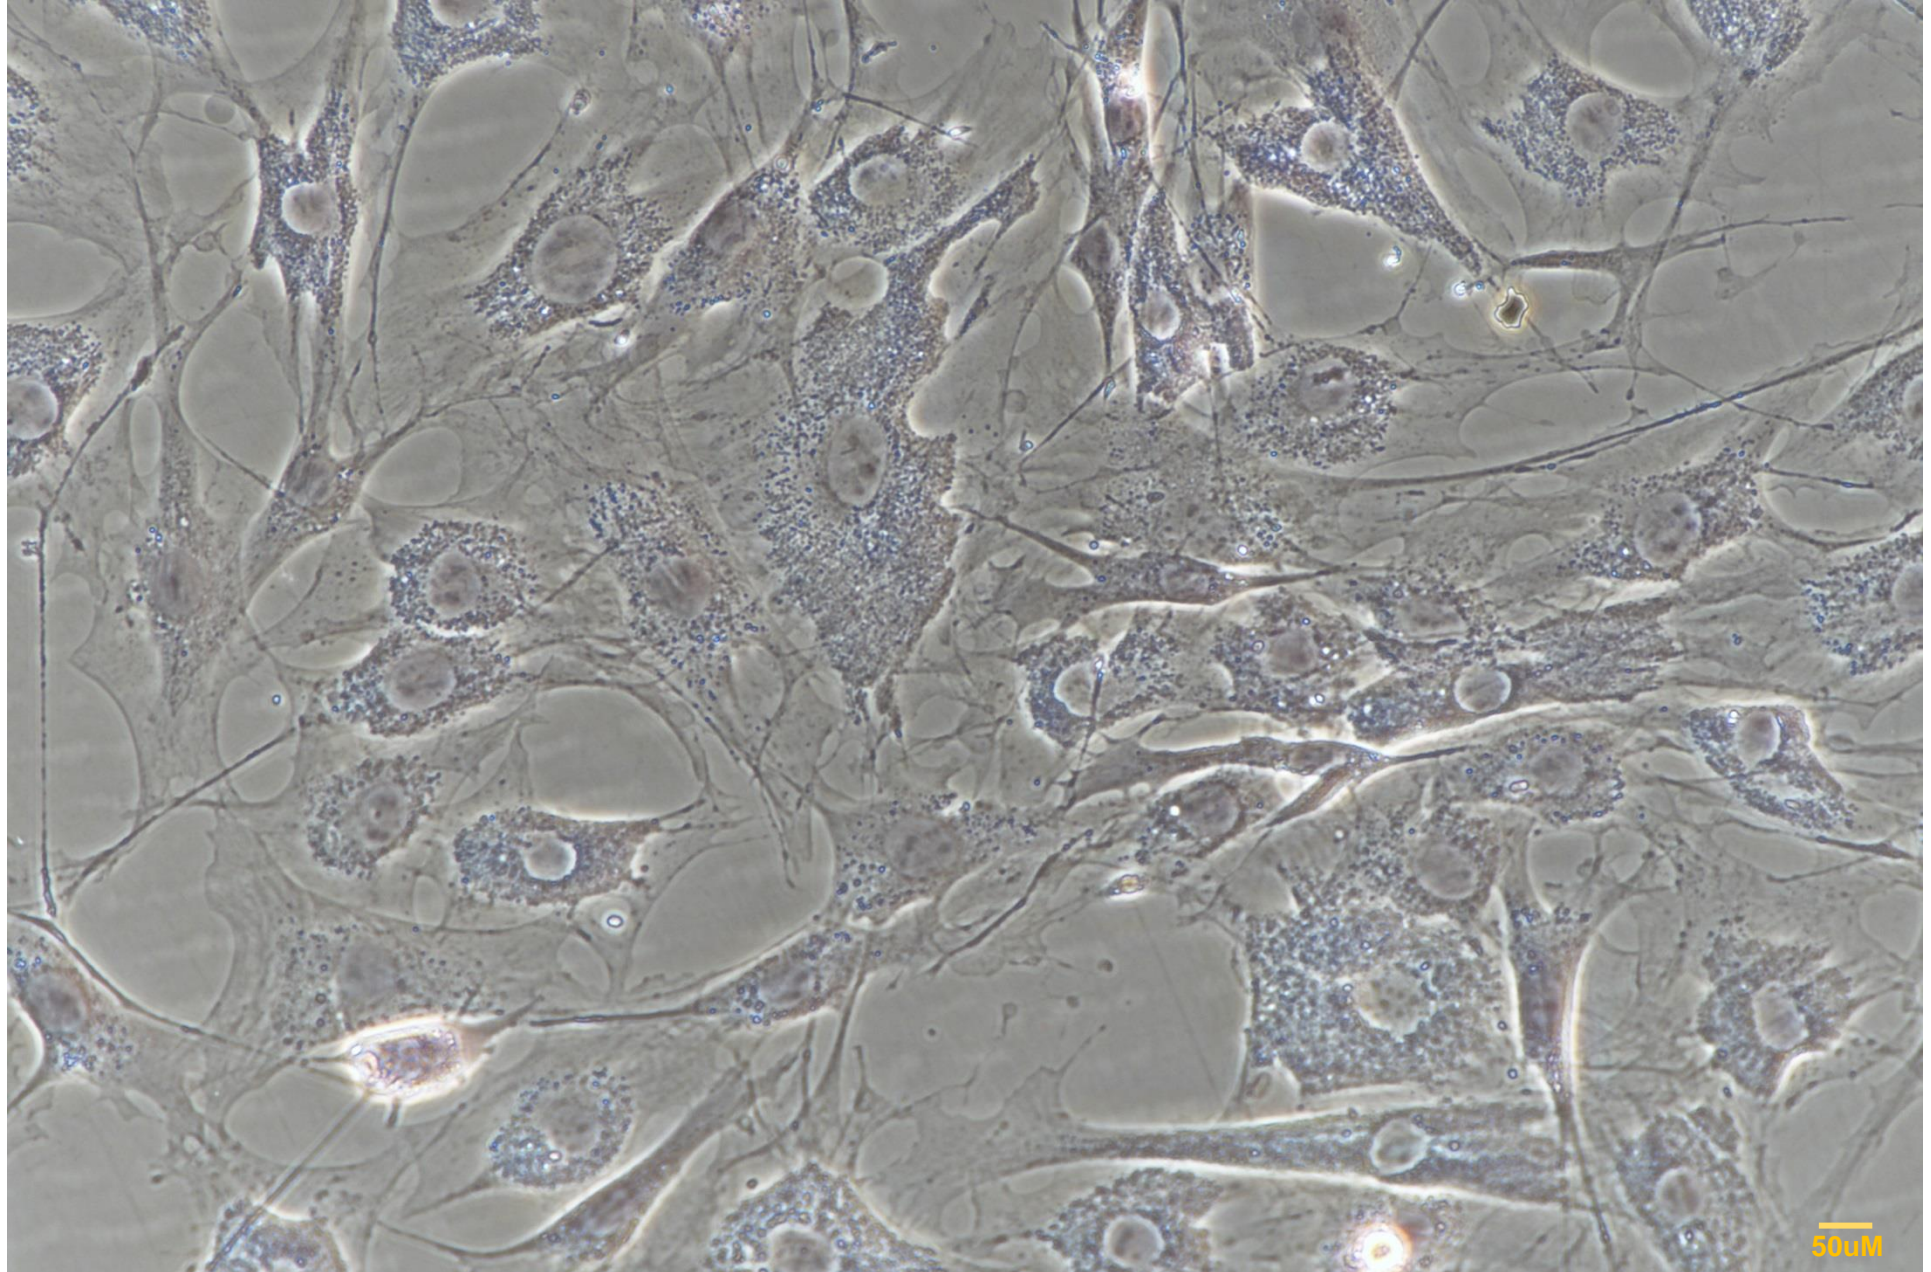

D-8 AM

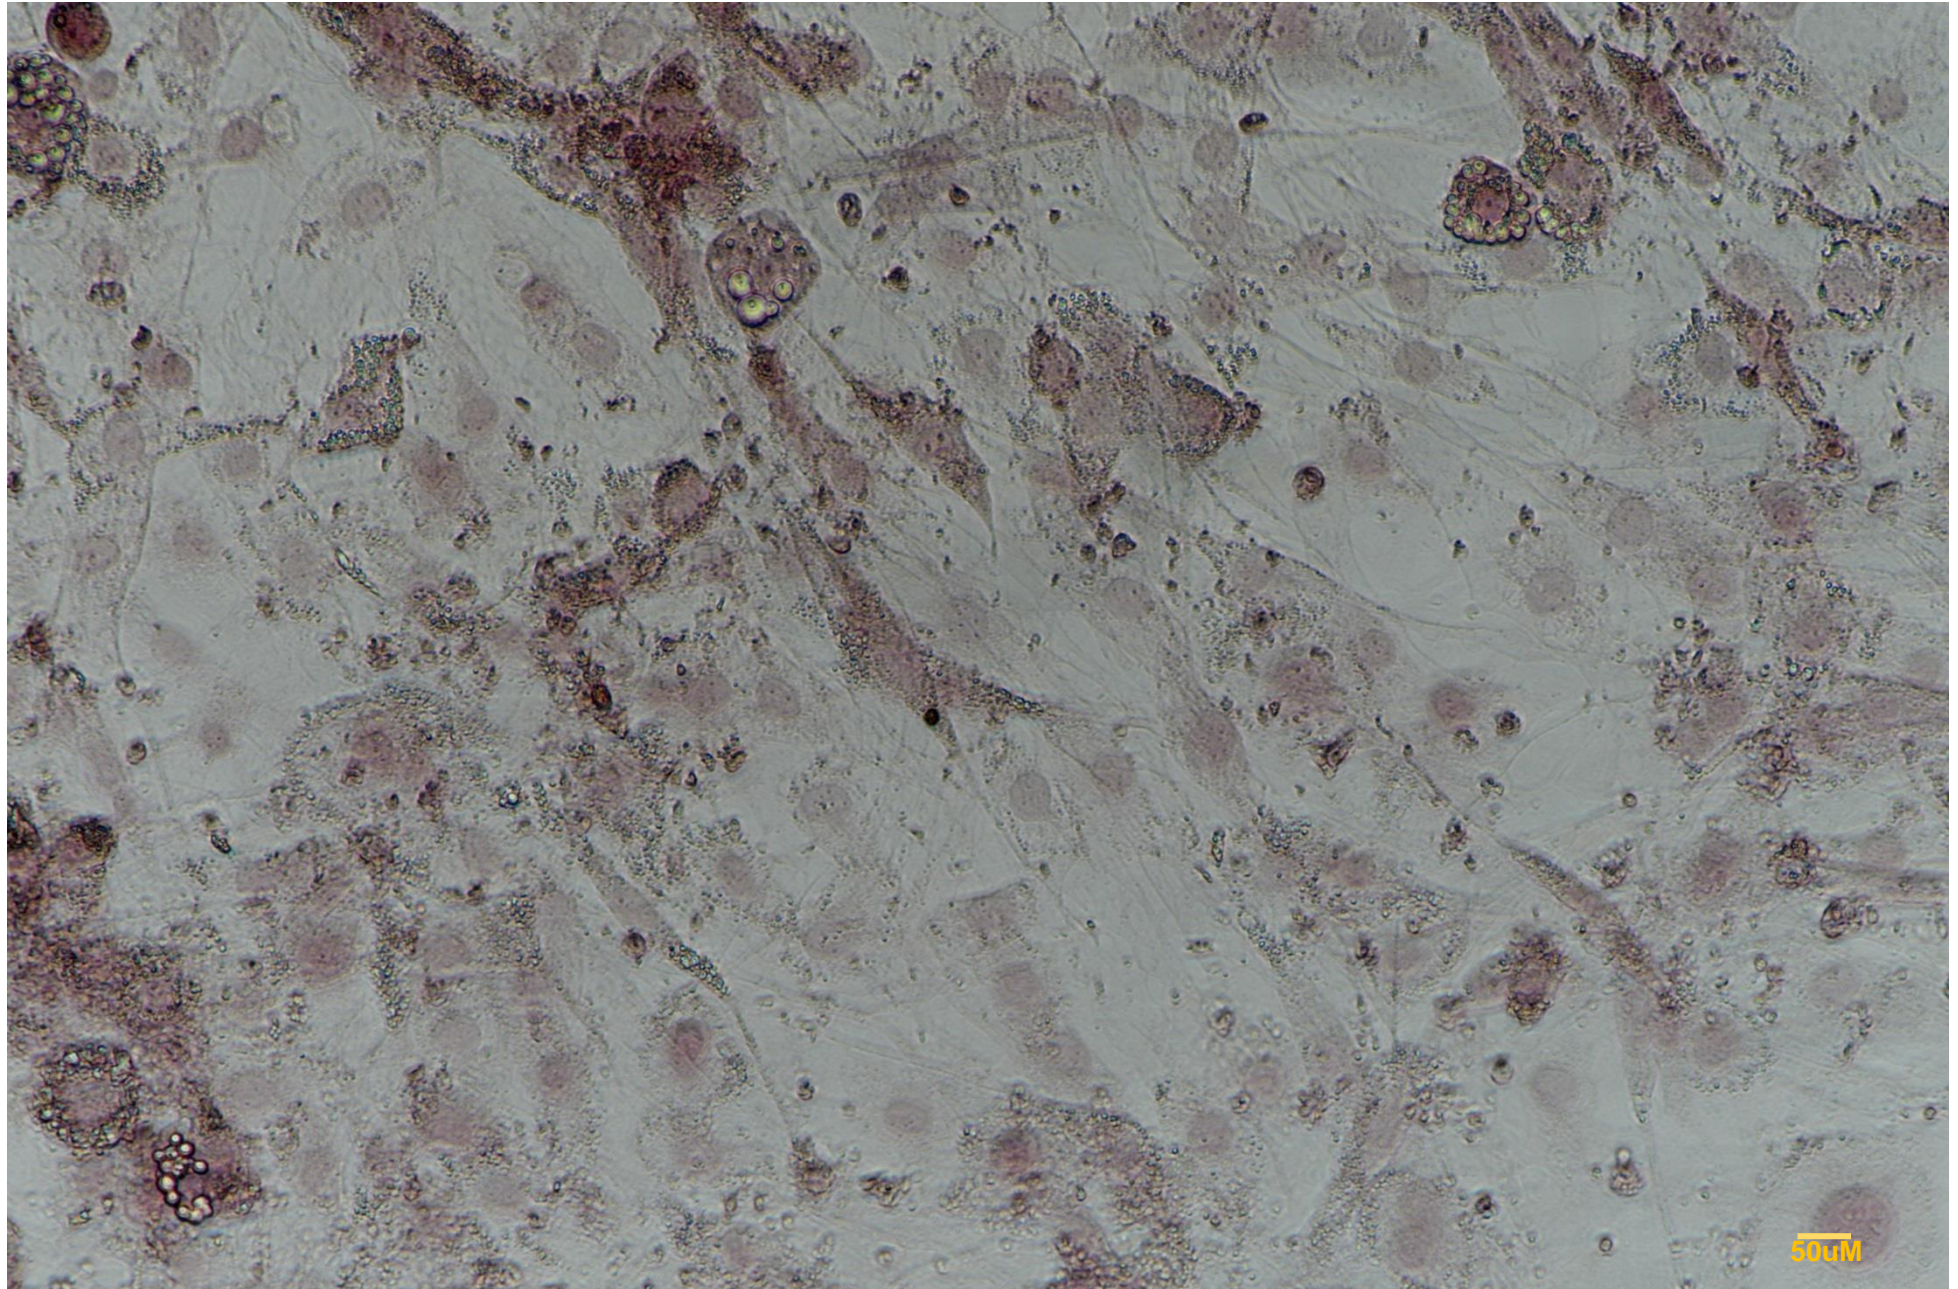

D-0 AM + LiCl

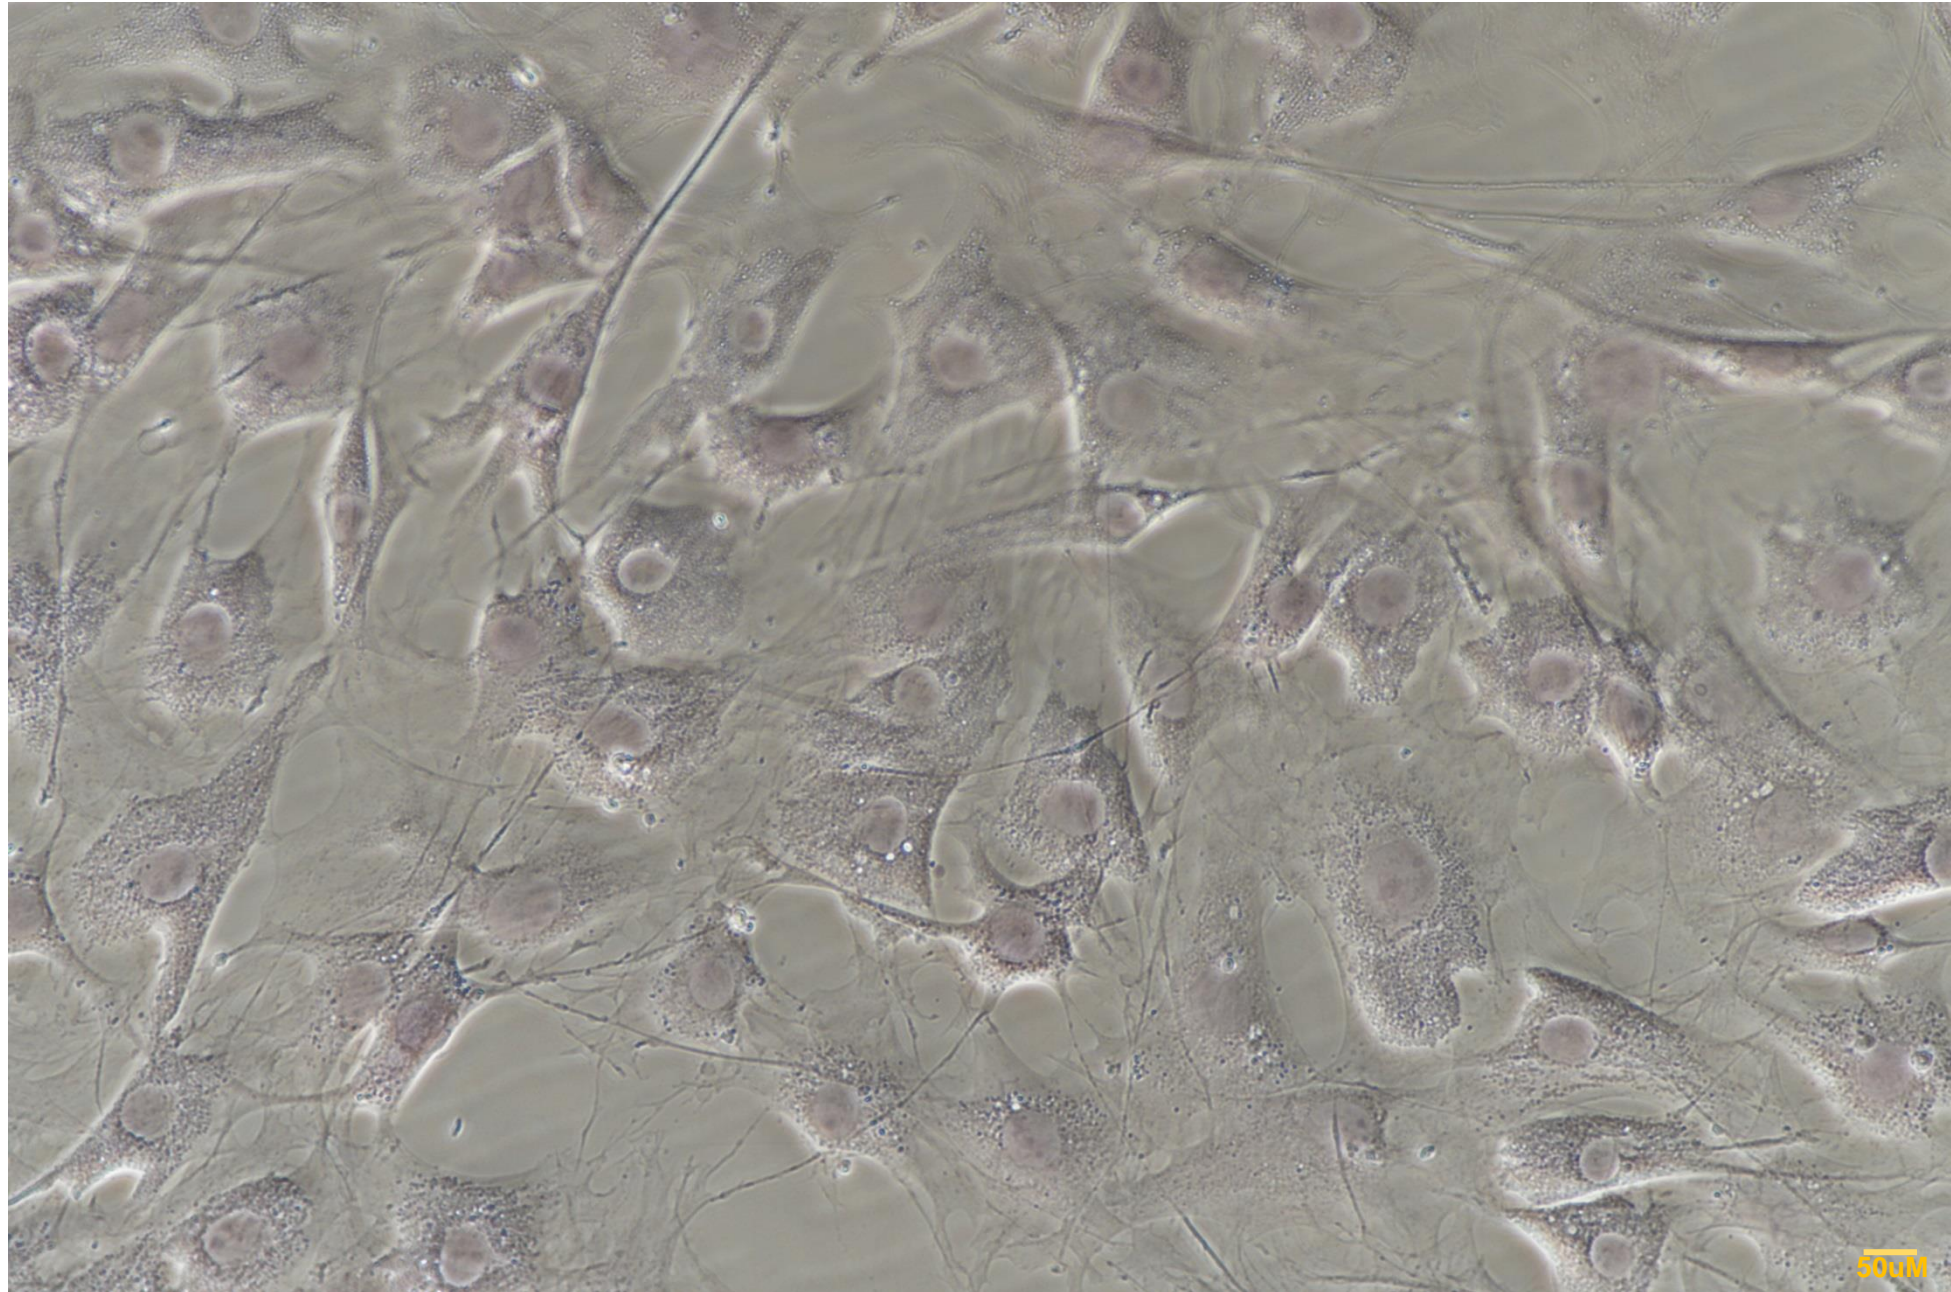

D-8 AM + LiCl

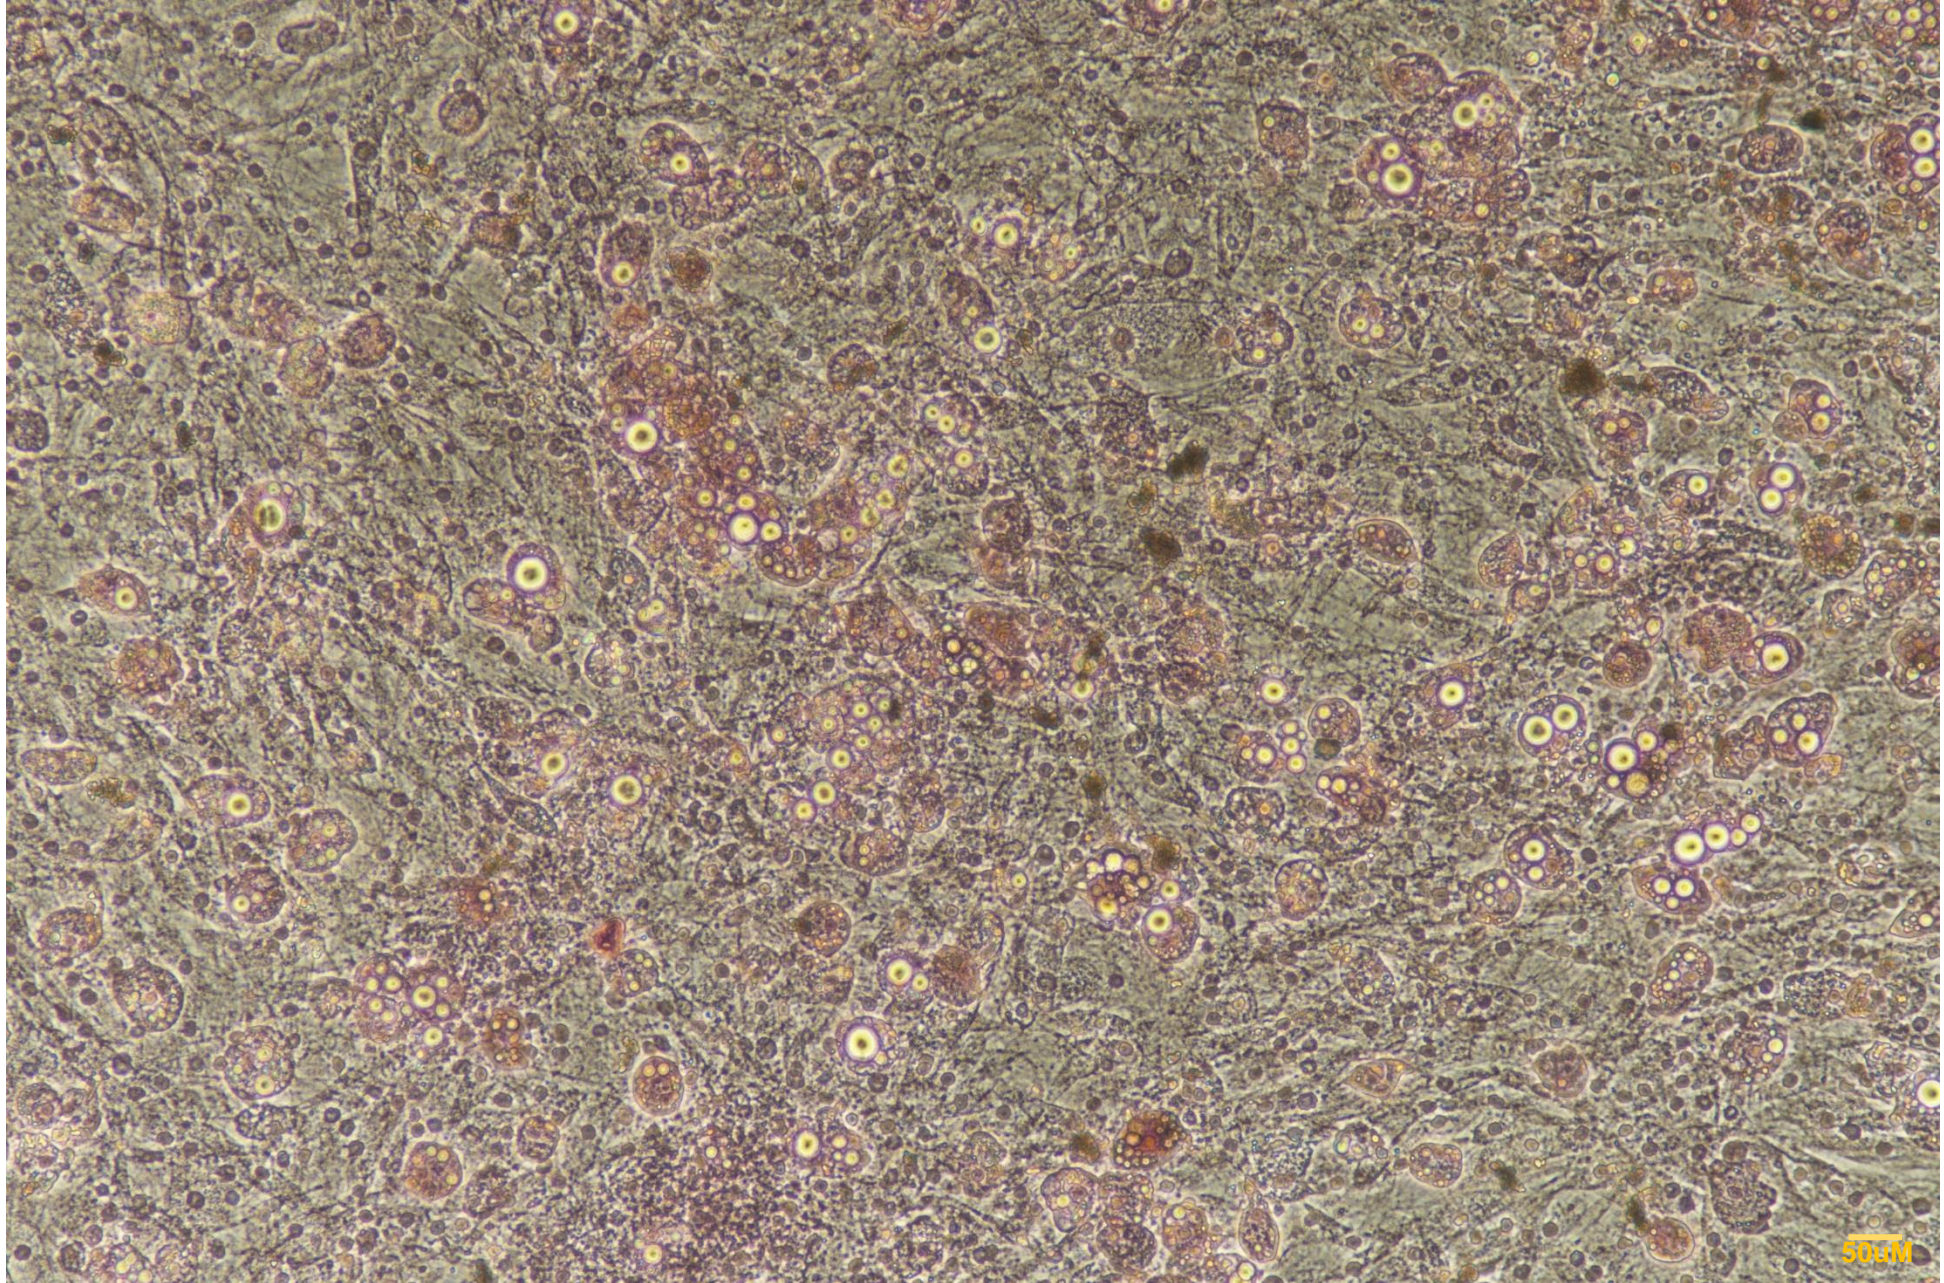

D-0 AM (LG)

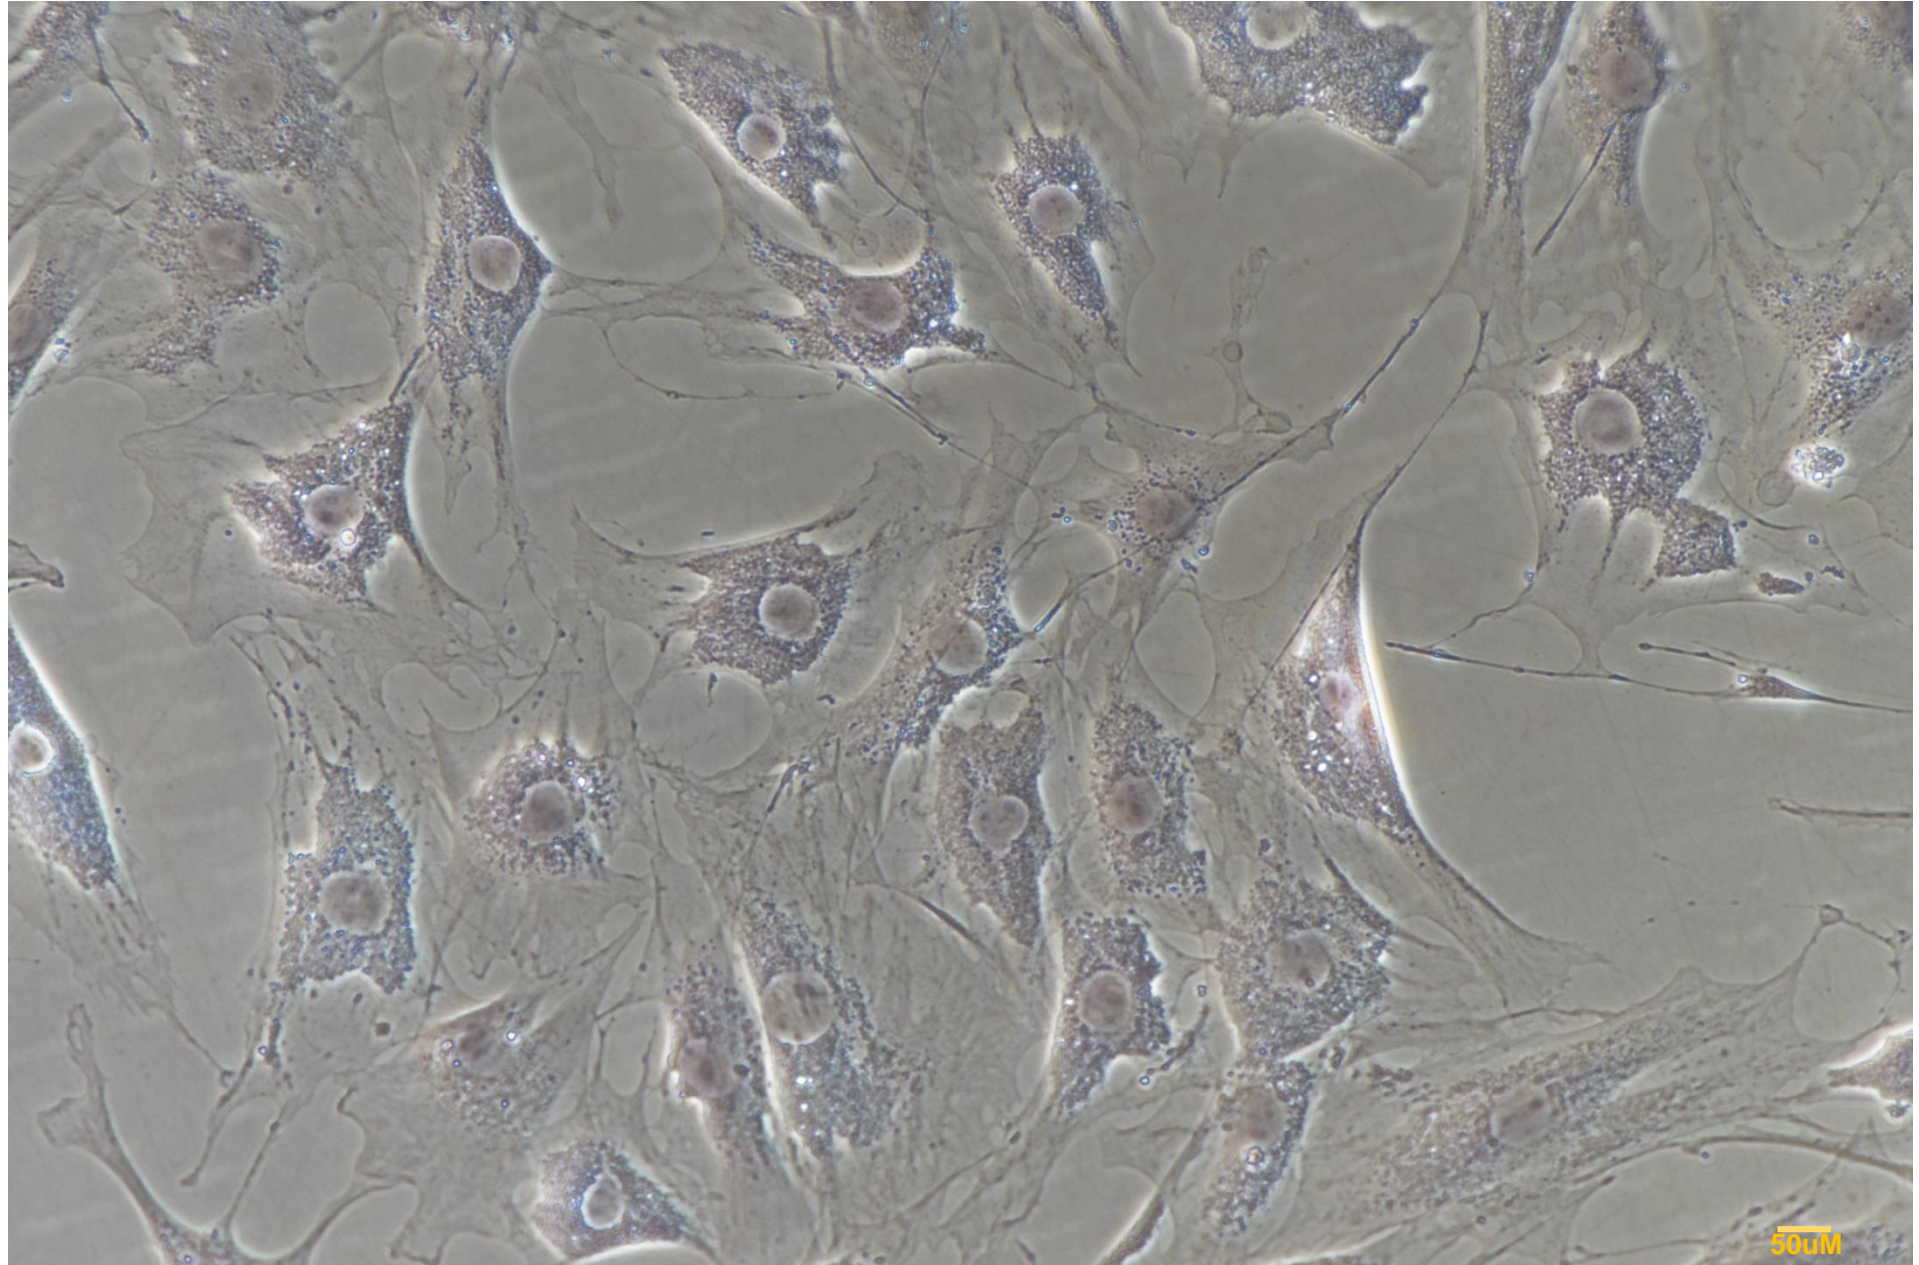

D-8 AM (LG)

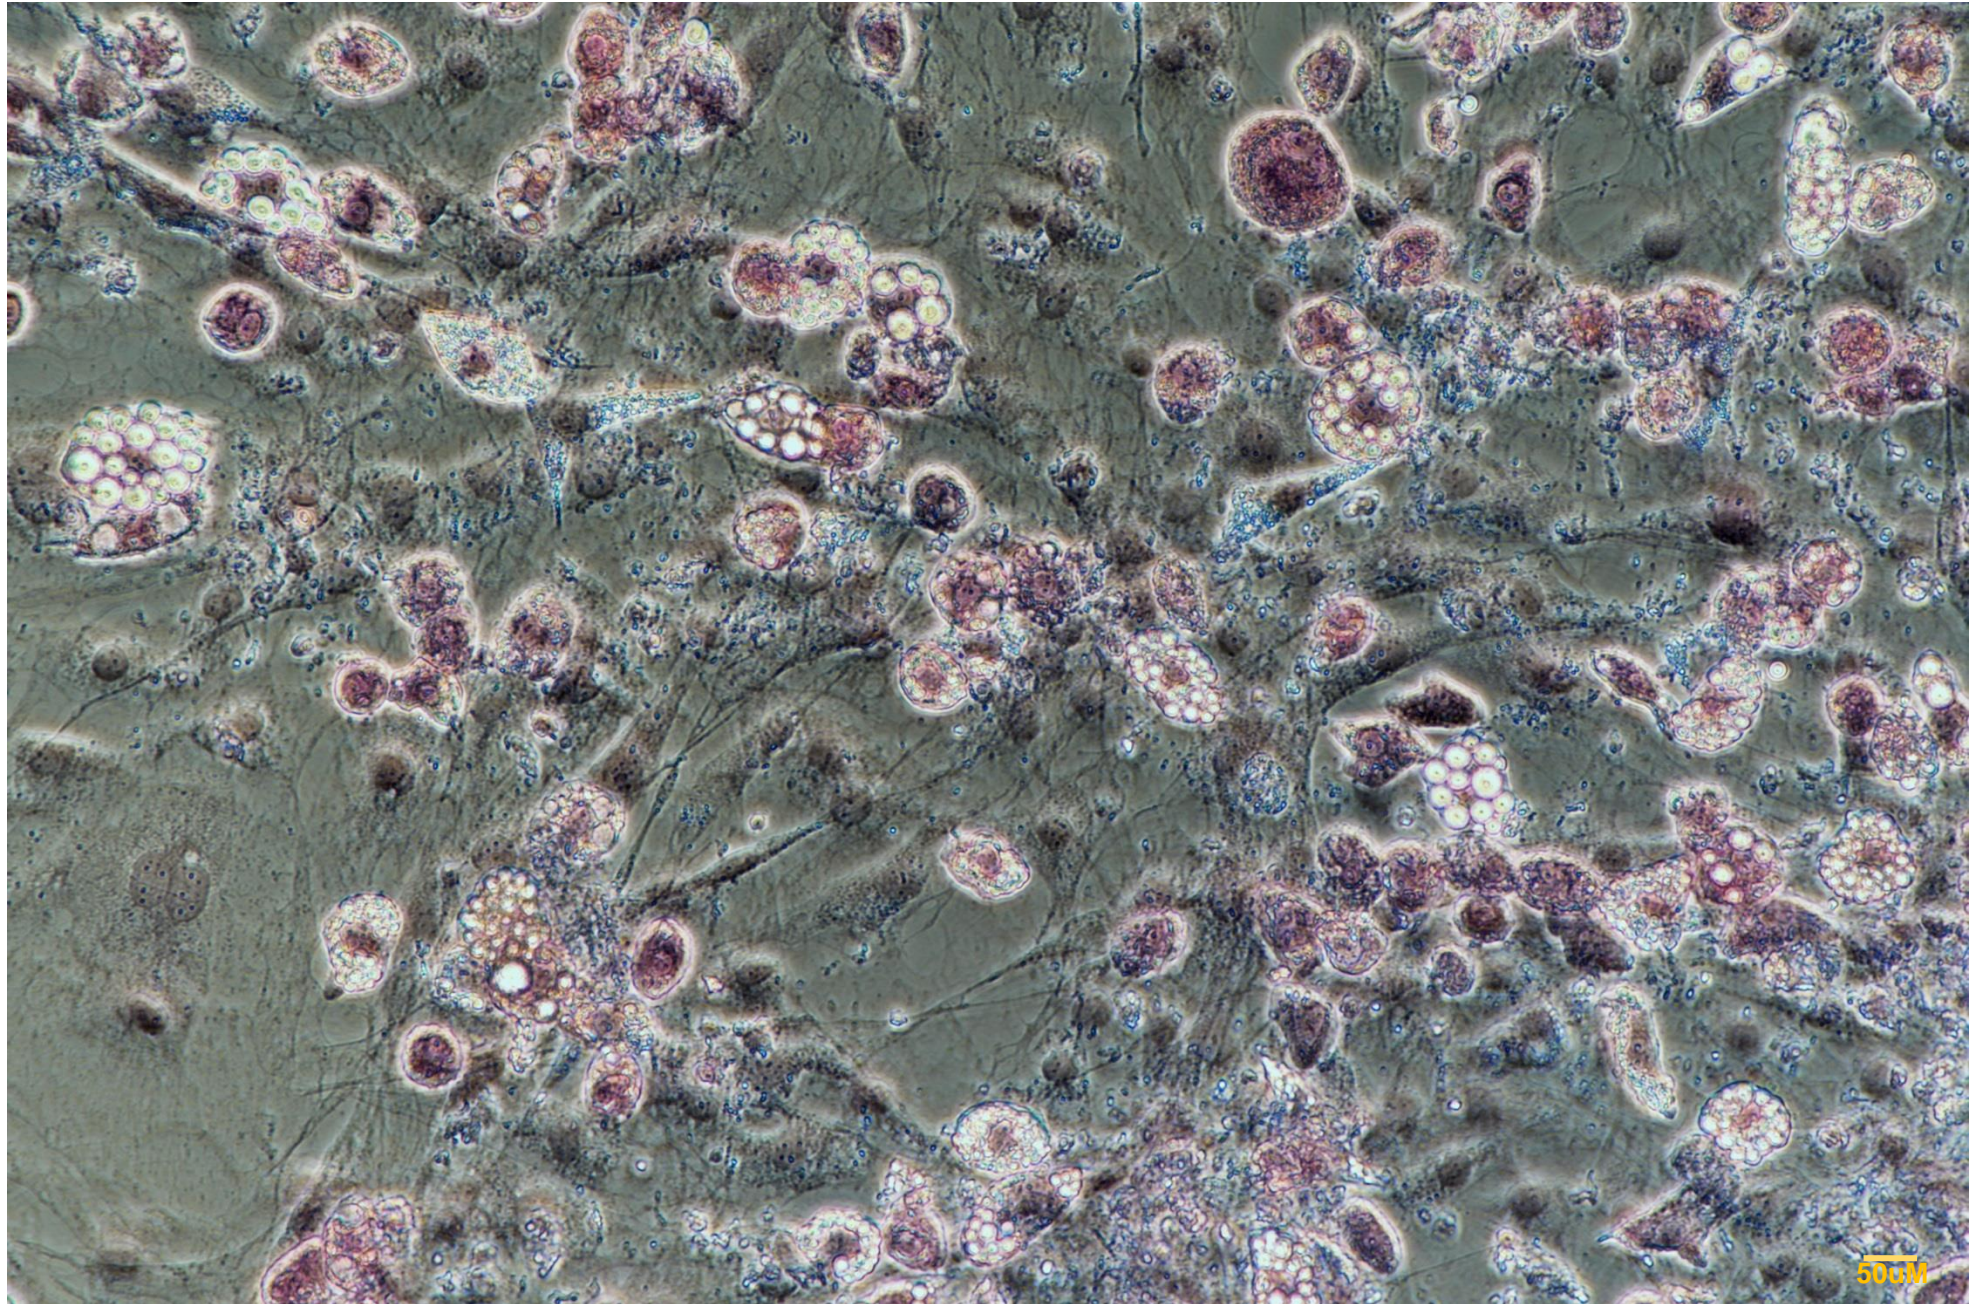



D-0 AM (HG)

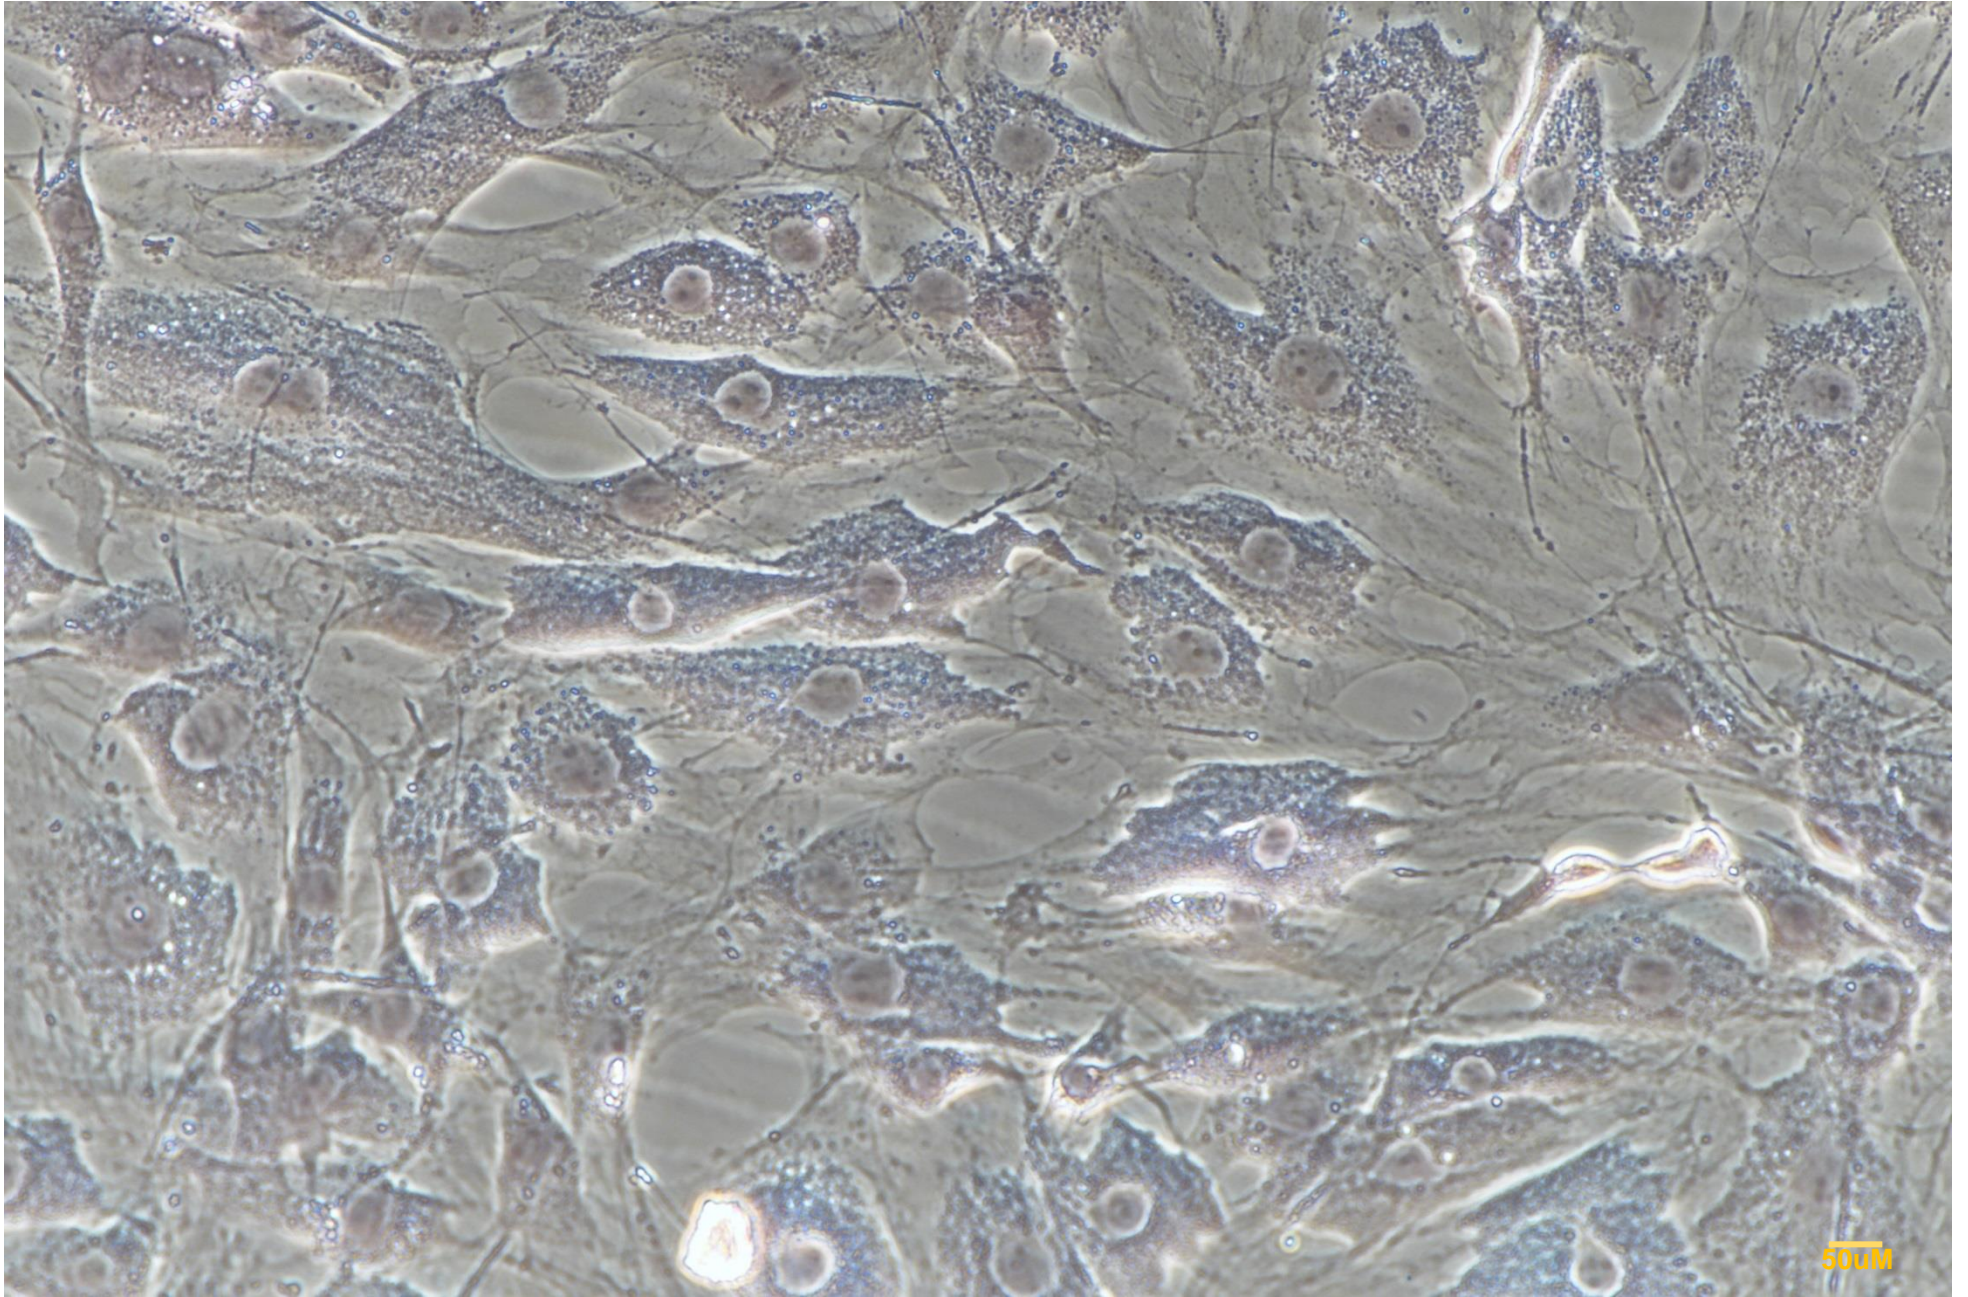

D-8 AM (HG)

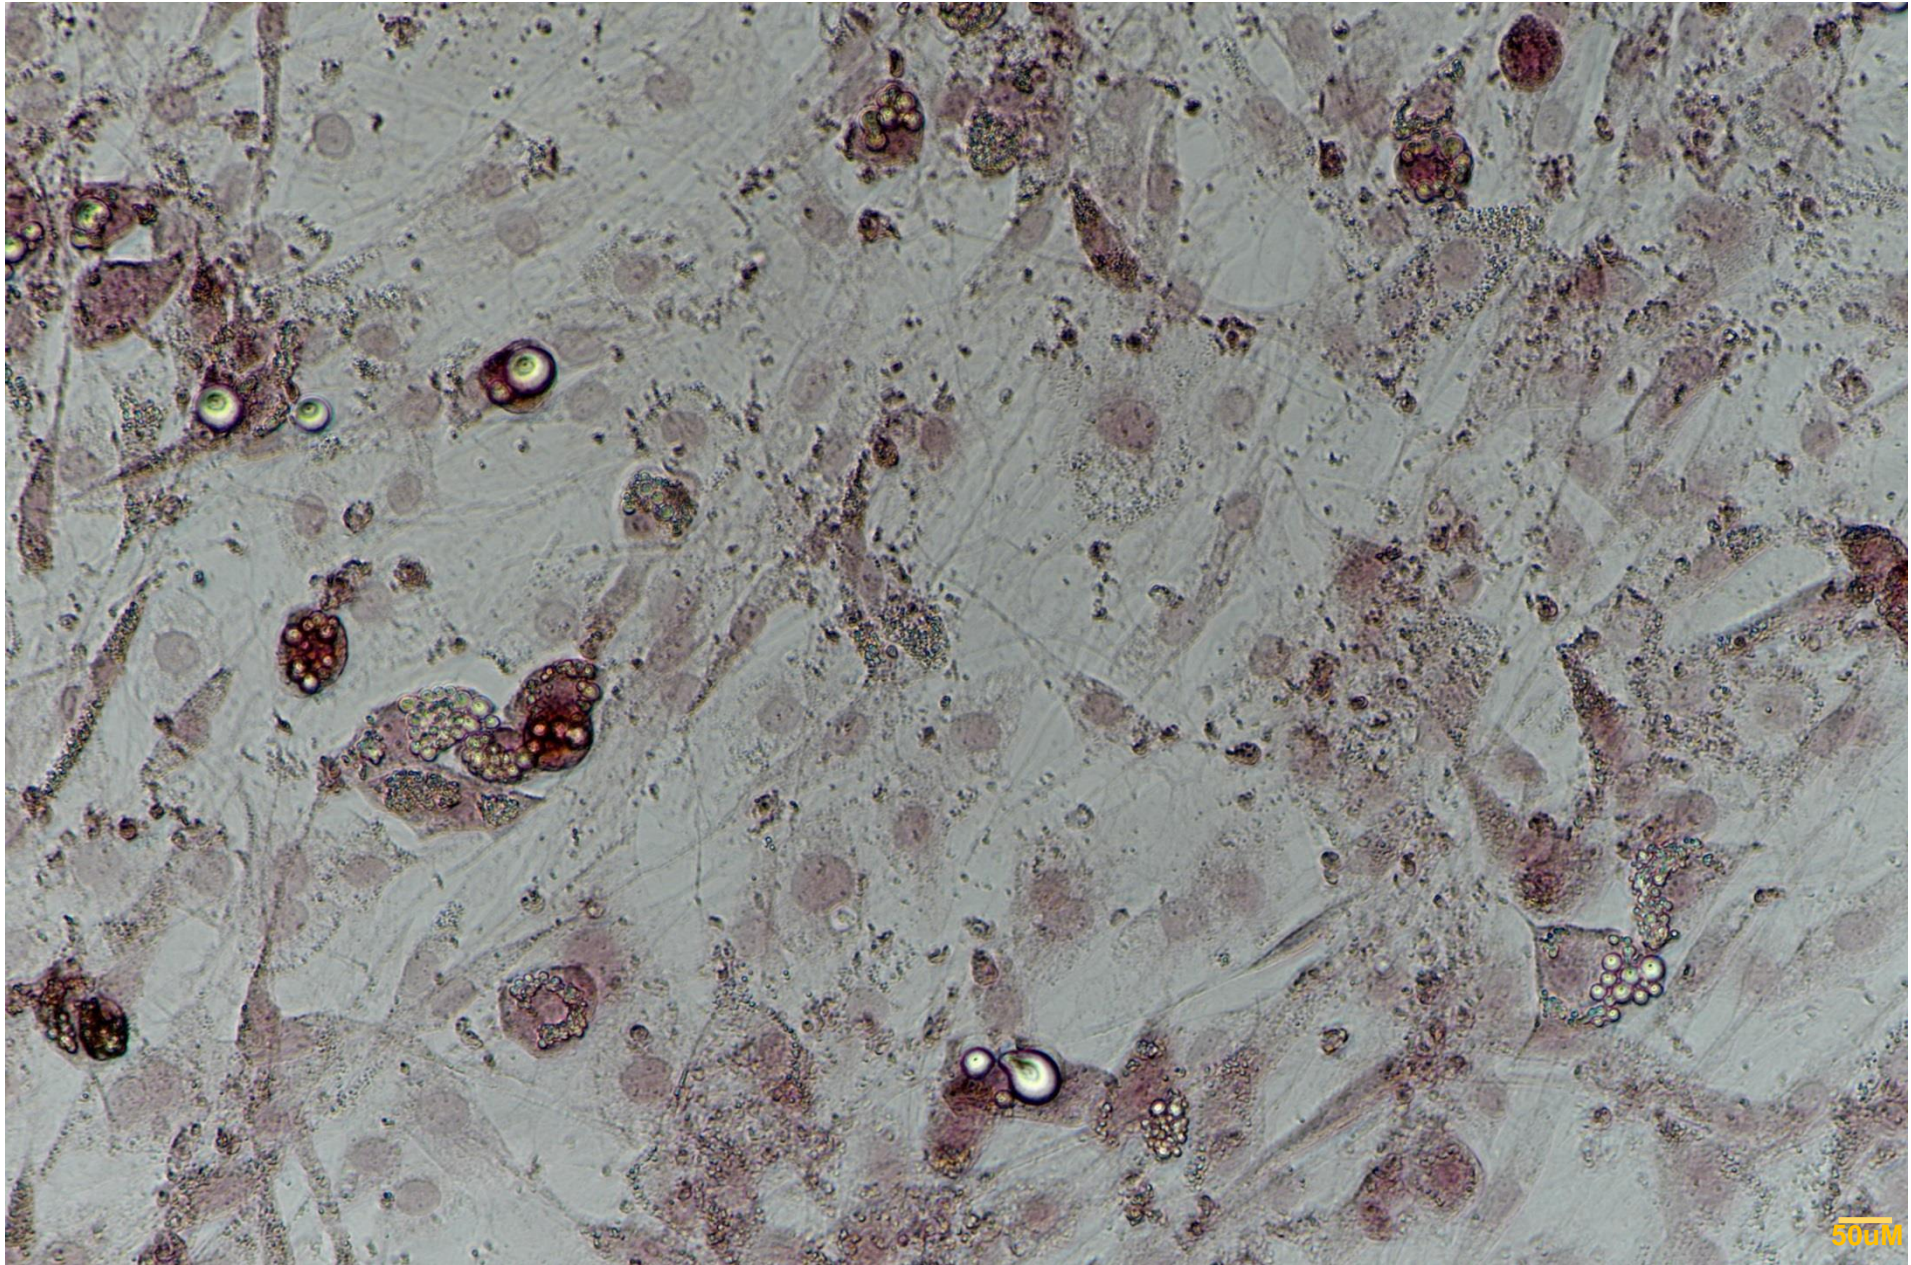

**D-0 AM (HG + LiCl)**

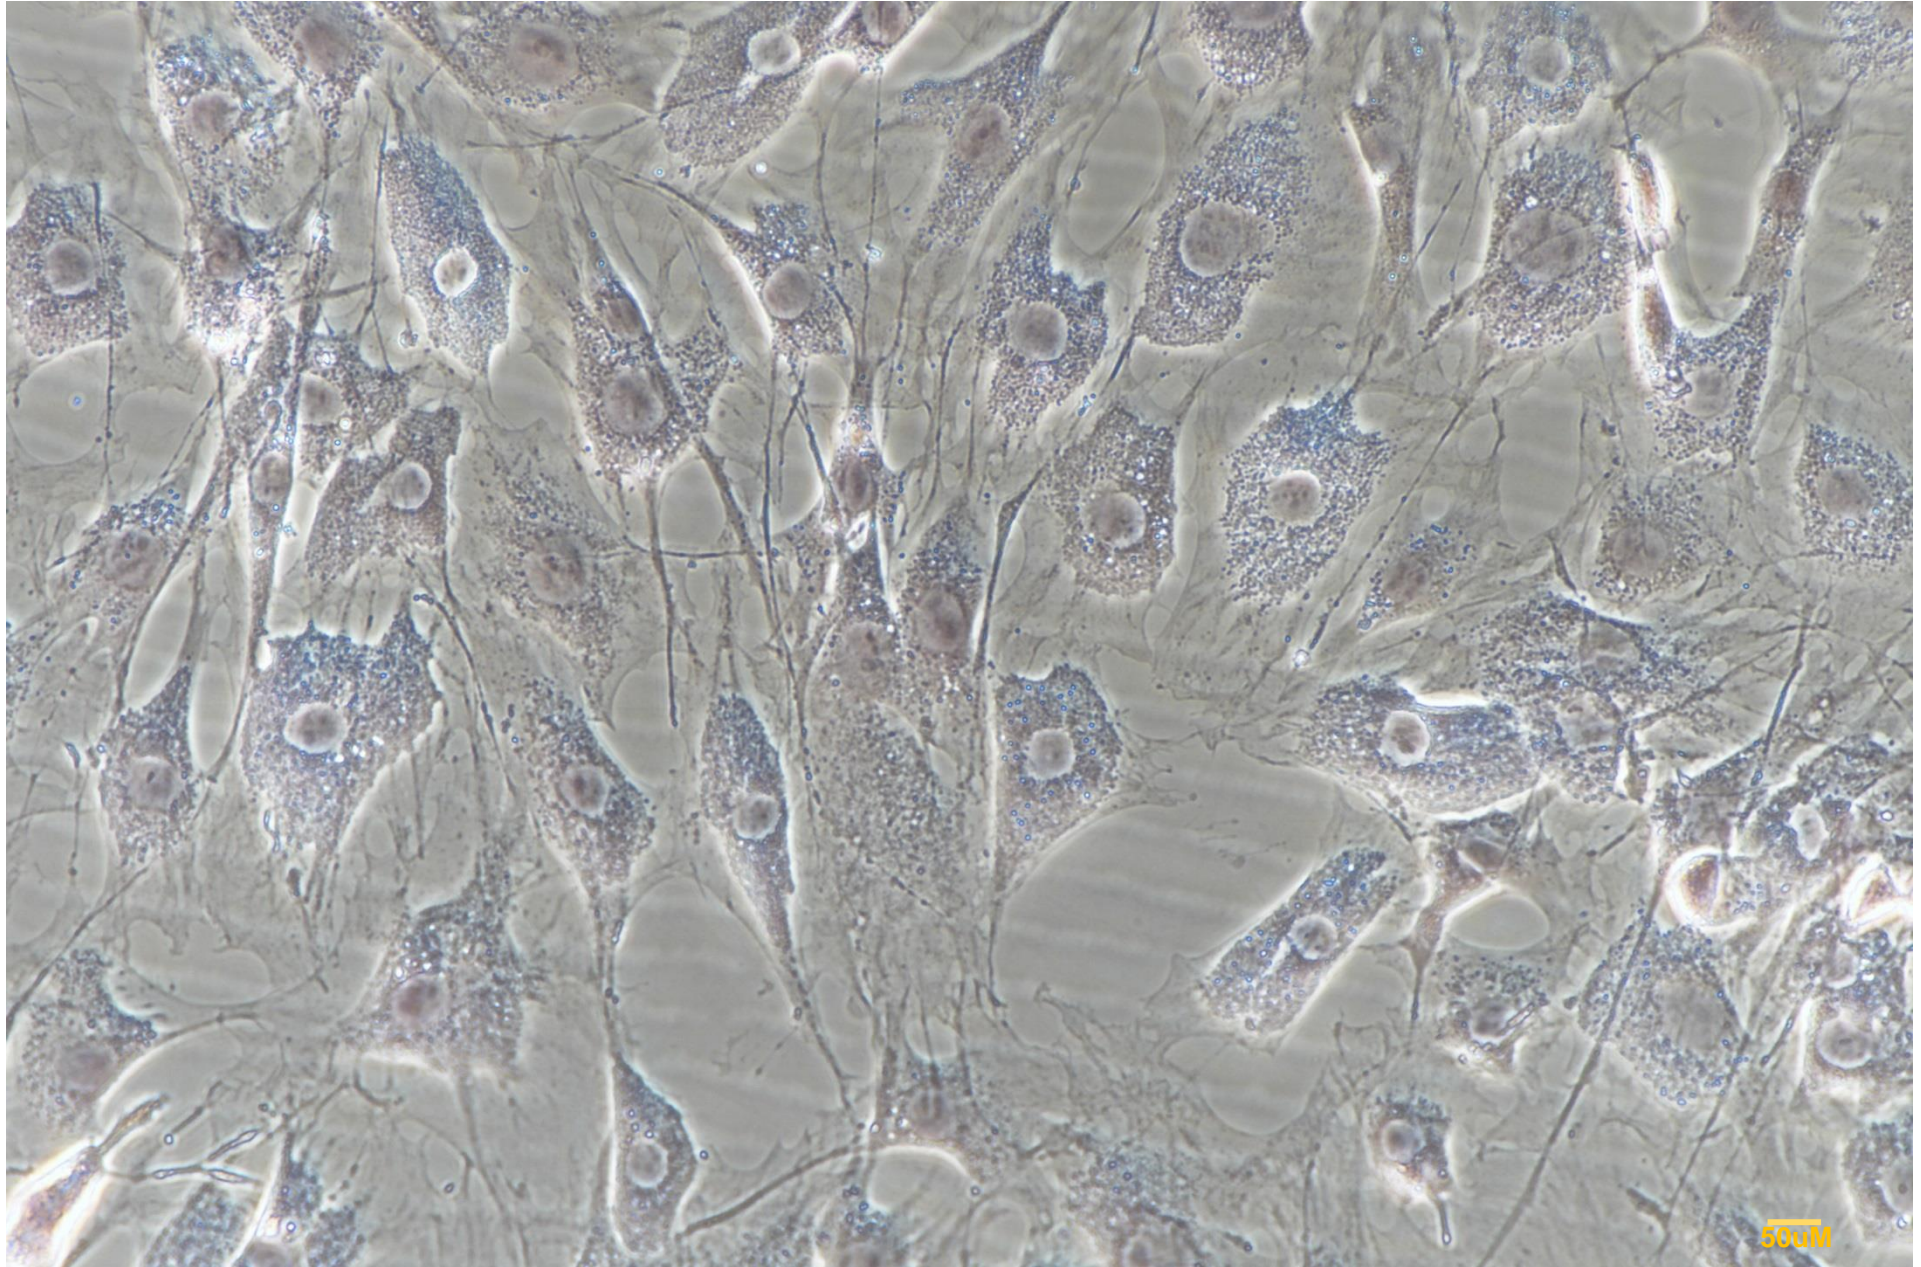

**D-8 AM (HG + LiCl)**

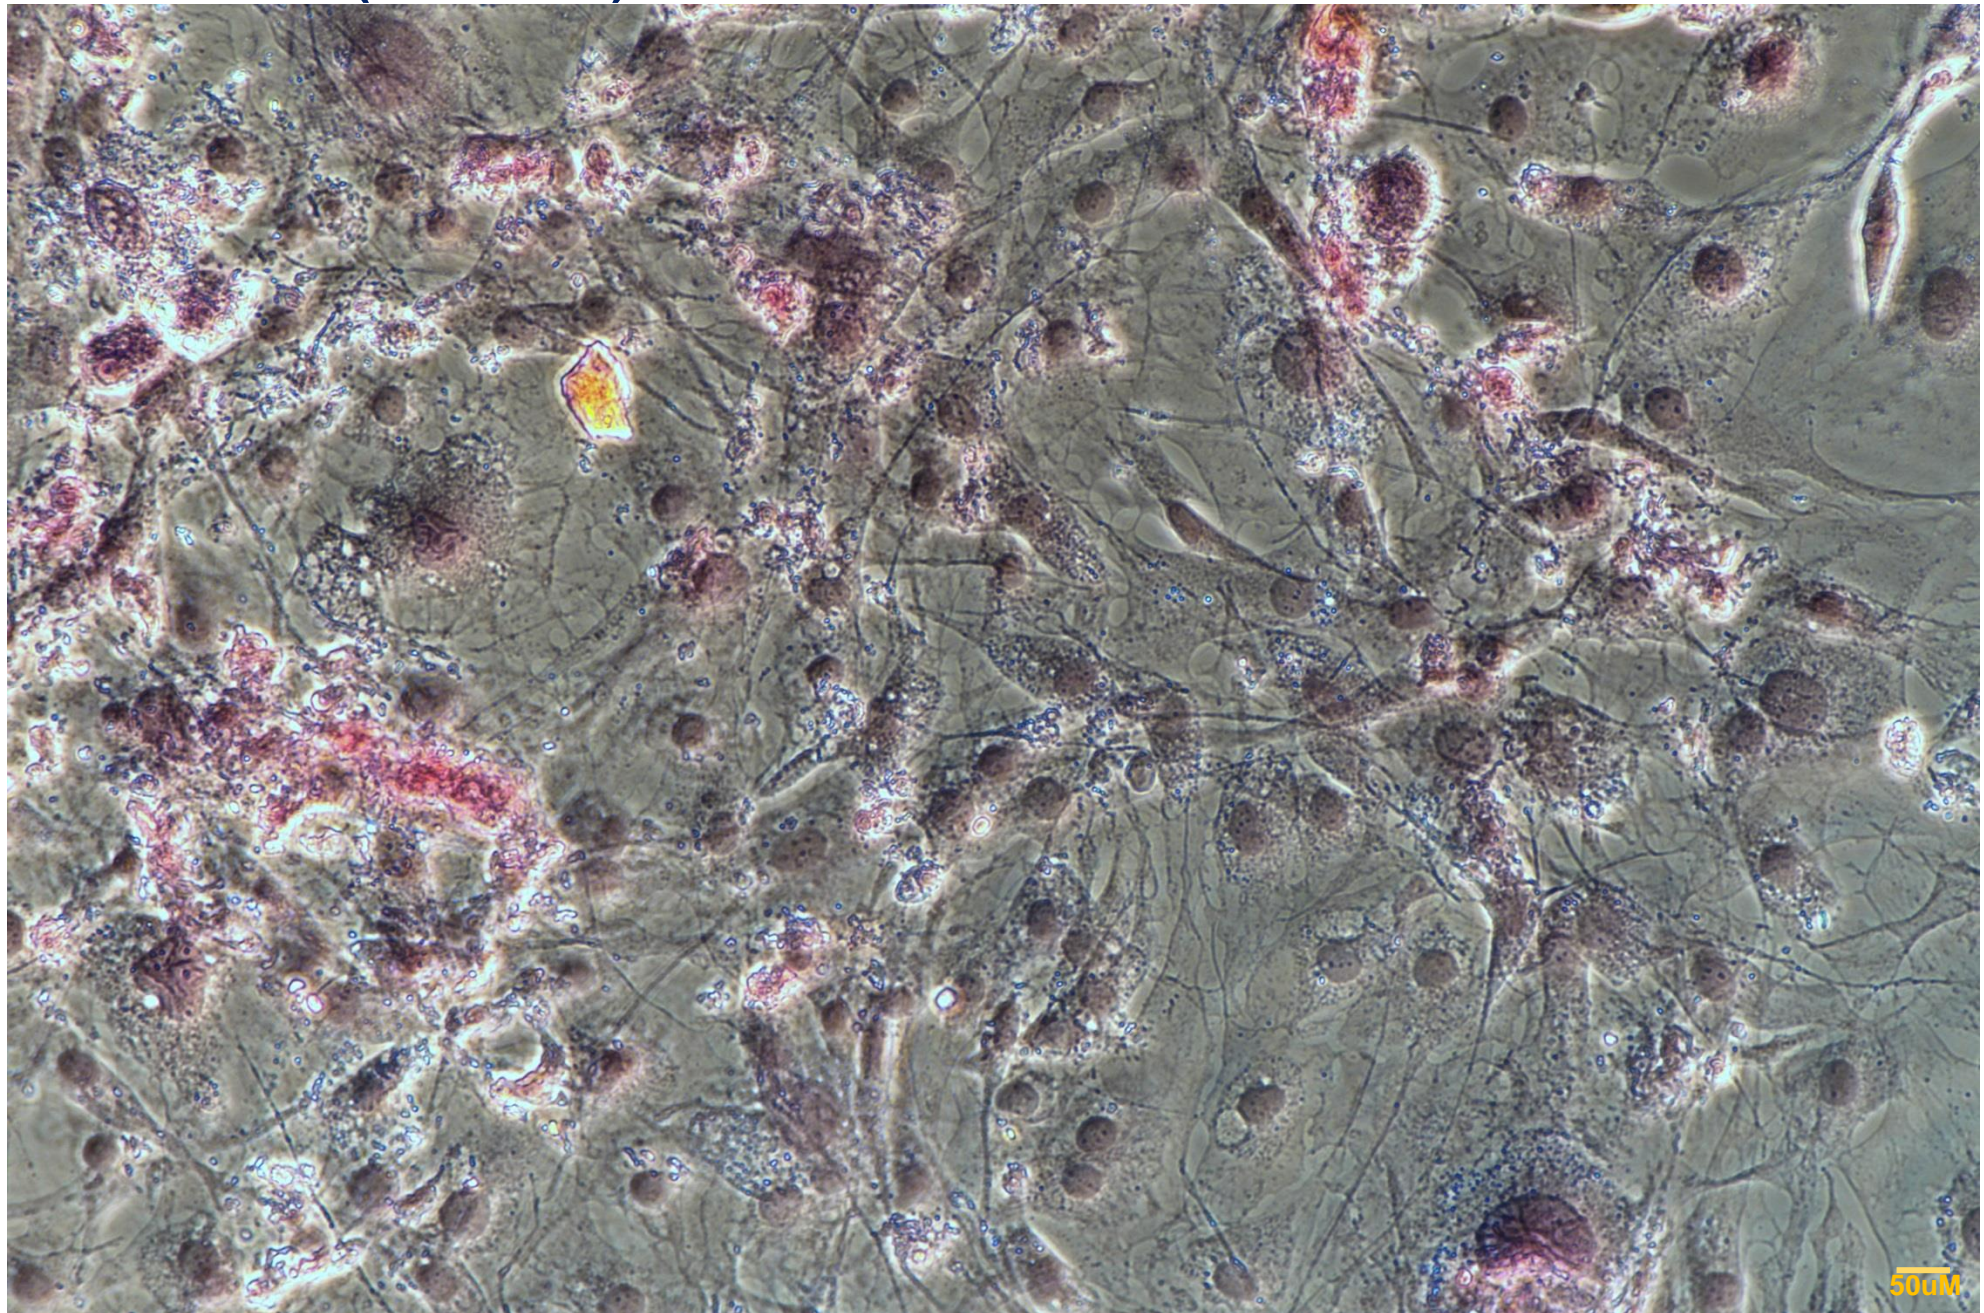

Fig.4 E)

D-8 AM

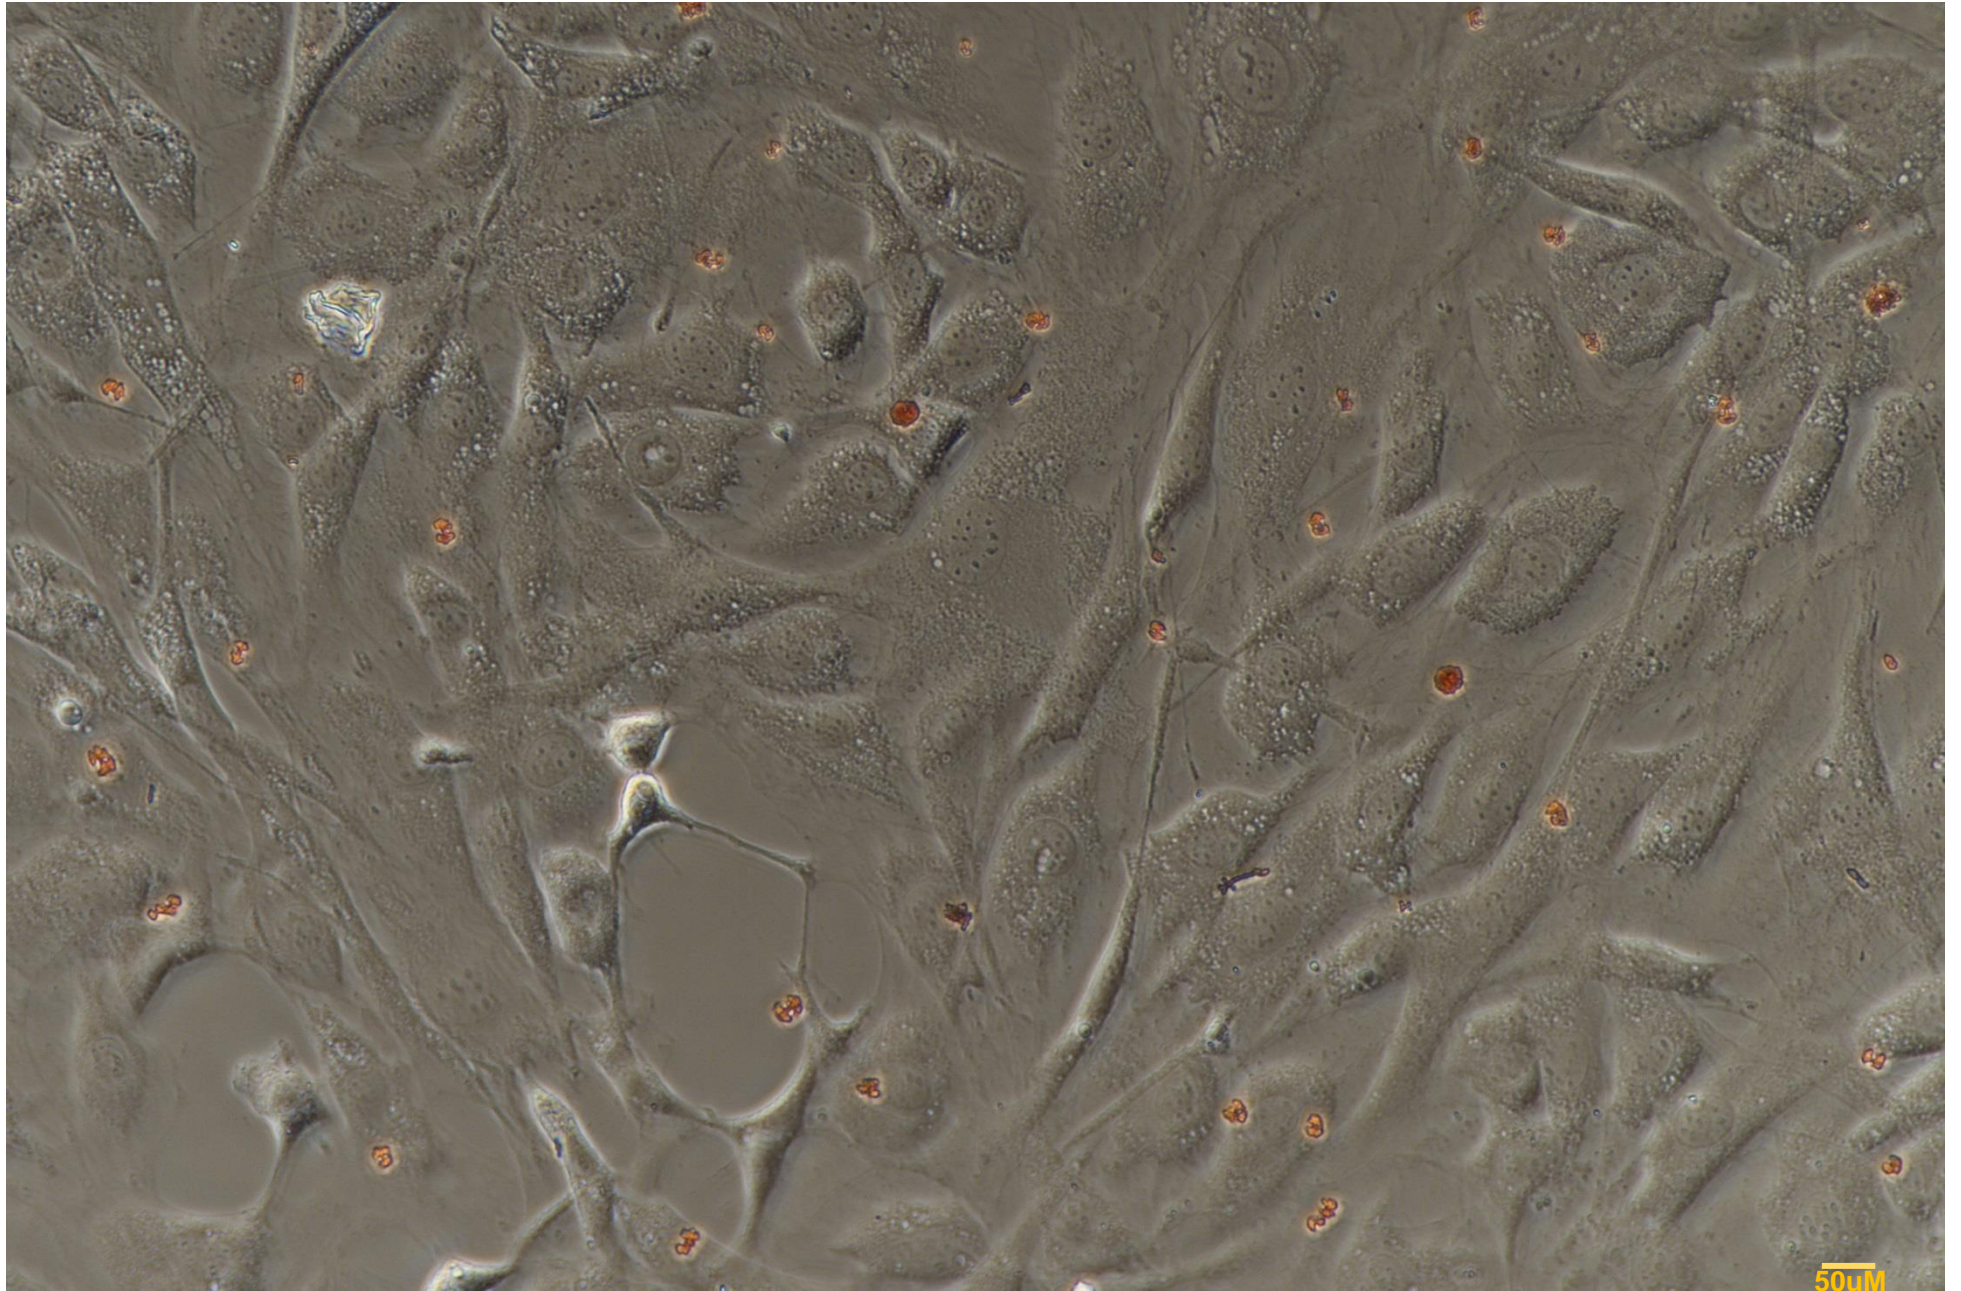

D-8 AM

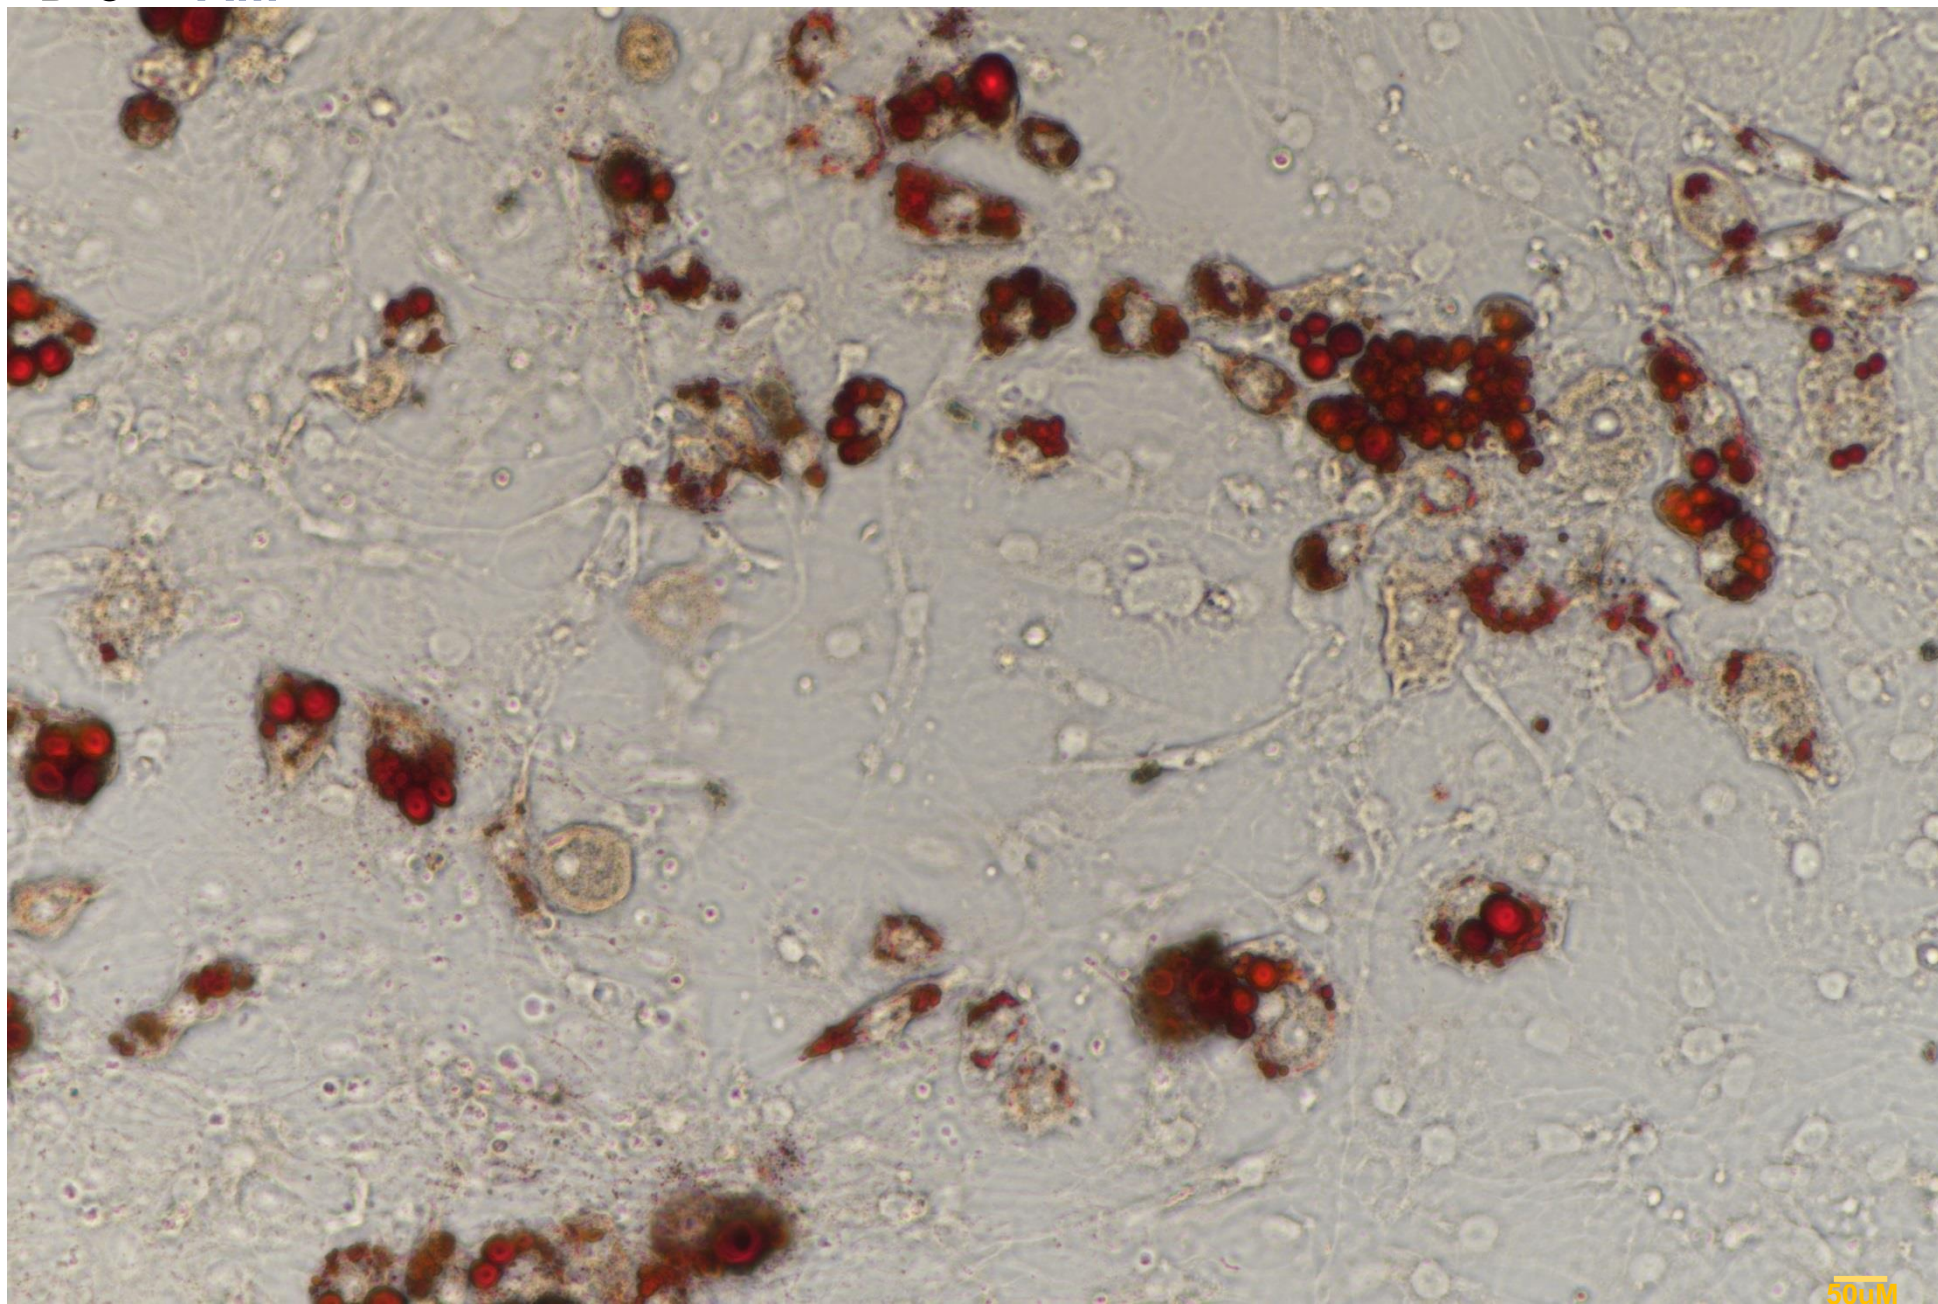

D-0 AM + LiCl

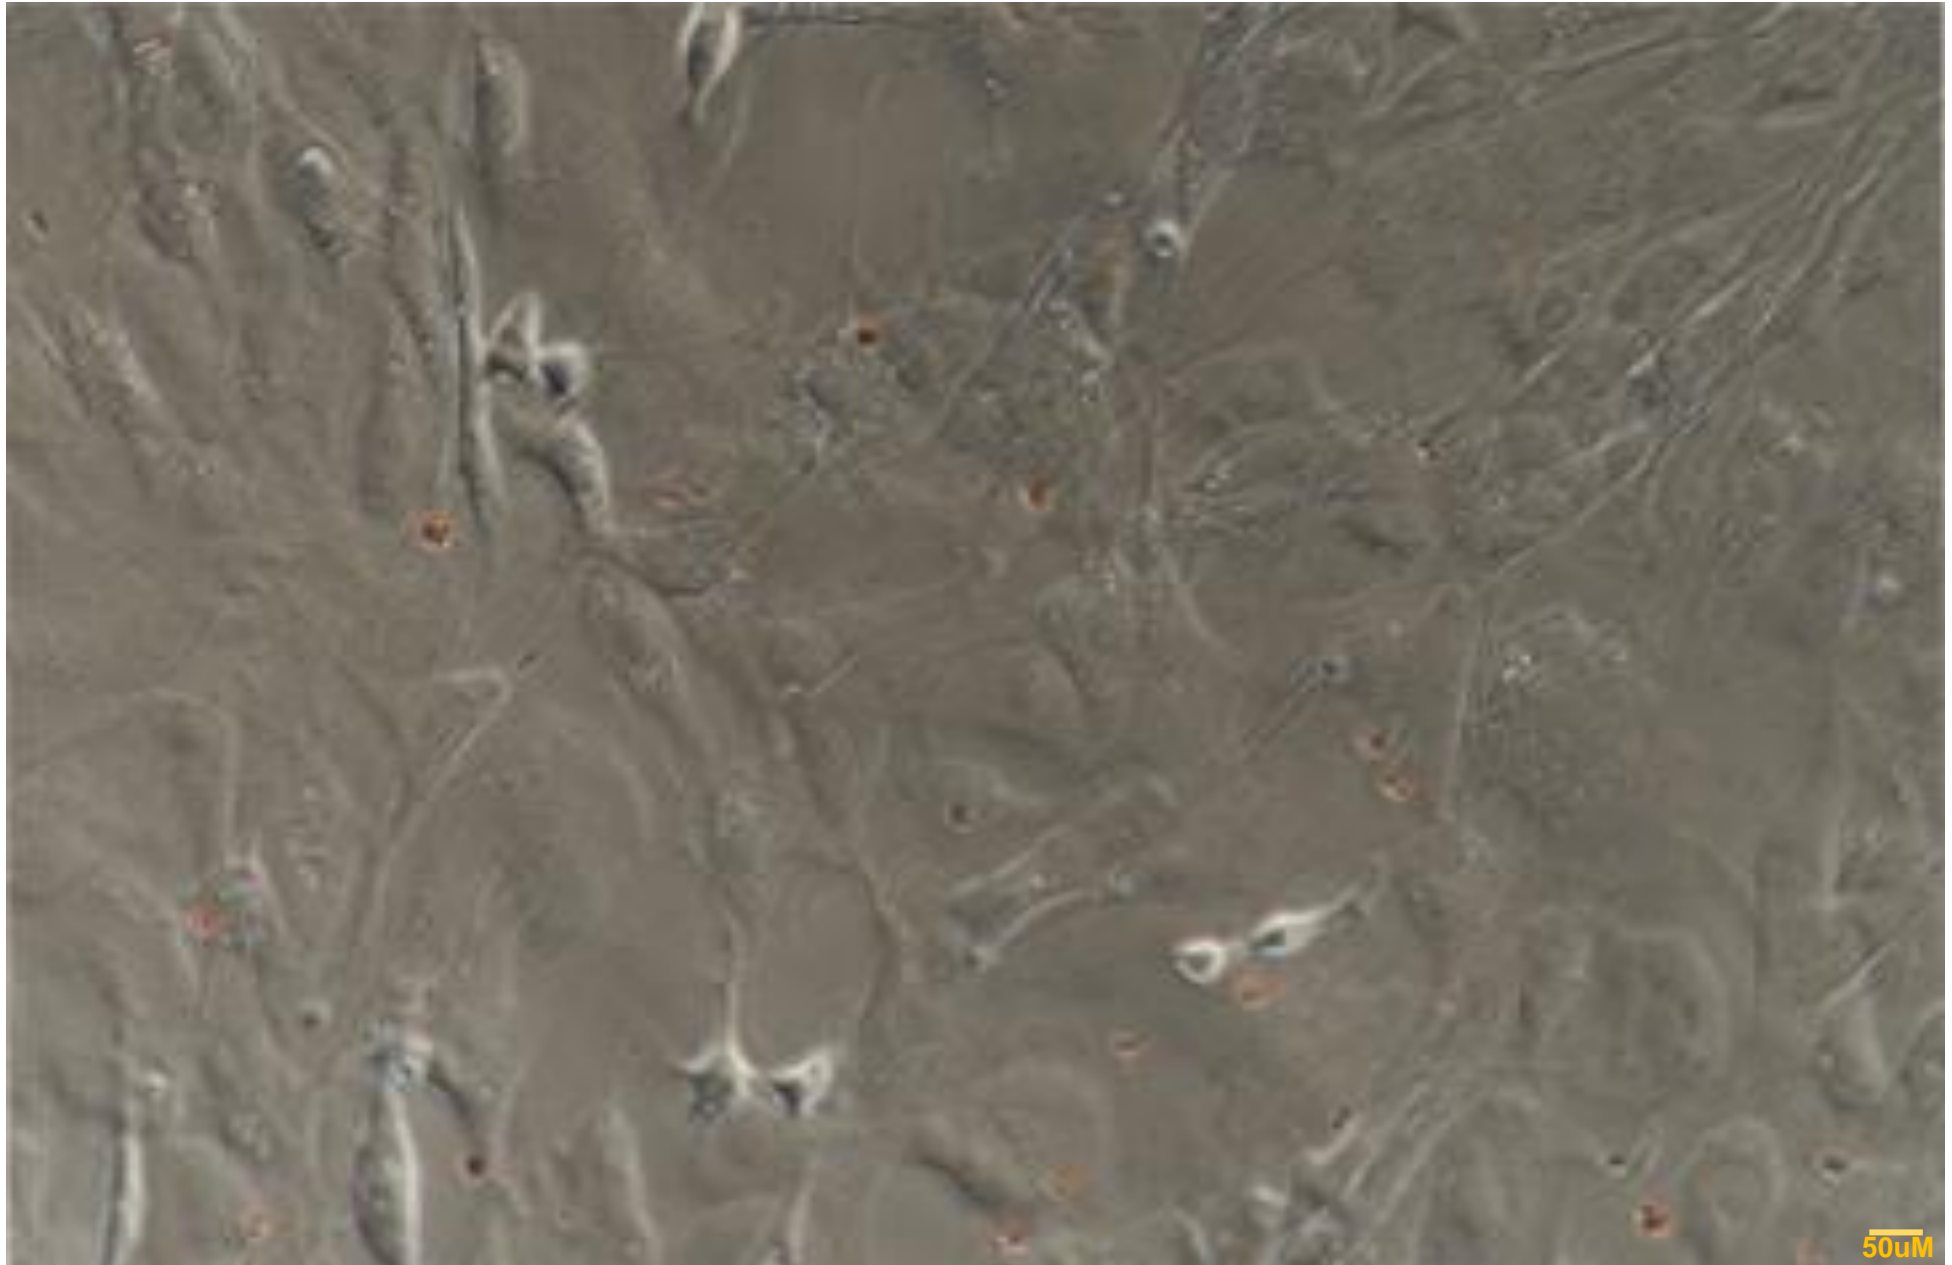

**D-8 AM + LiCl**

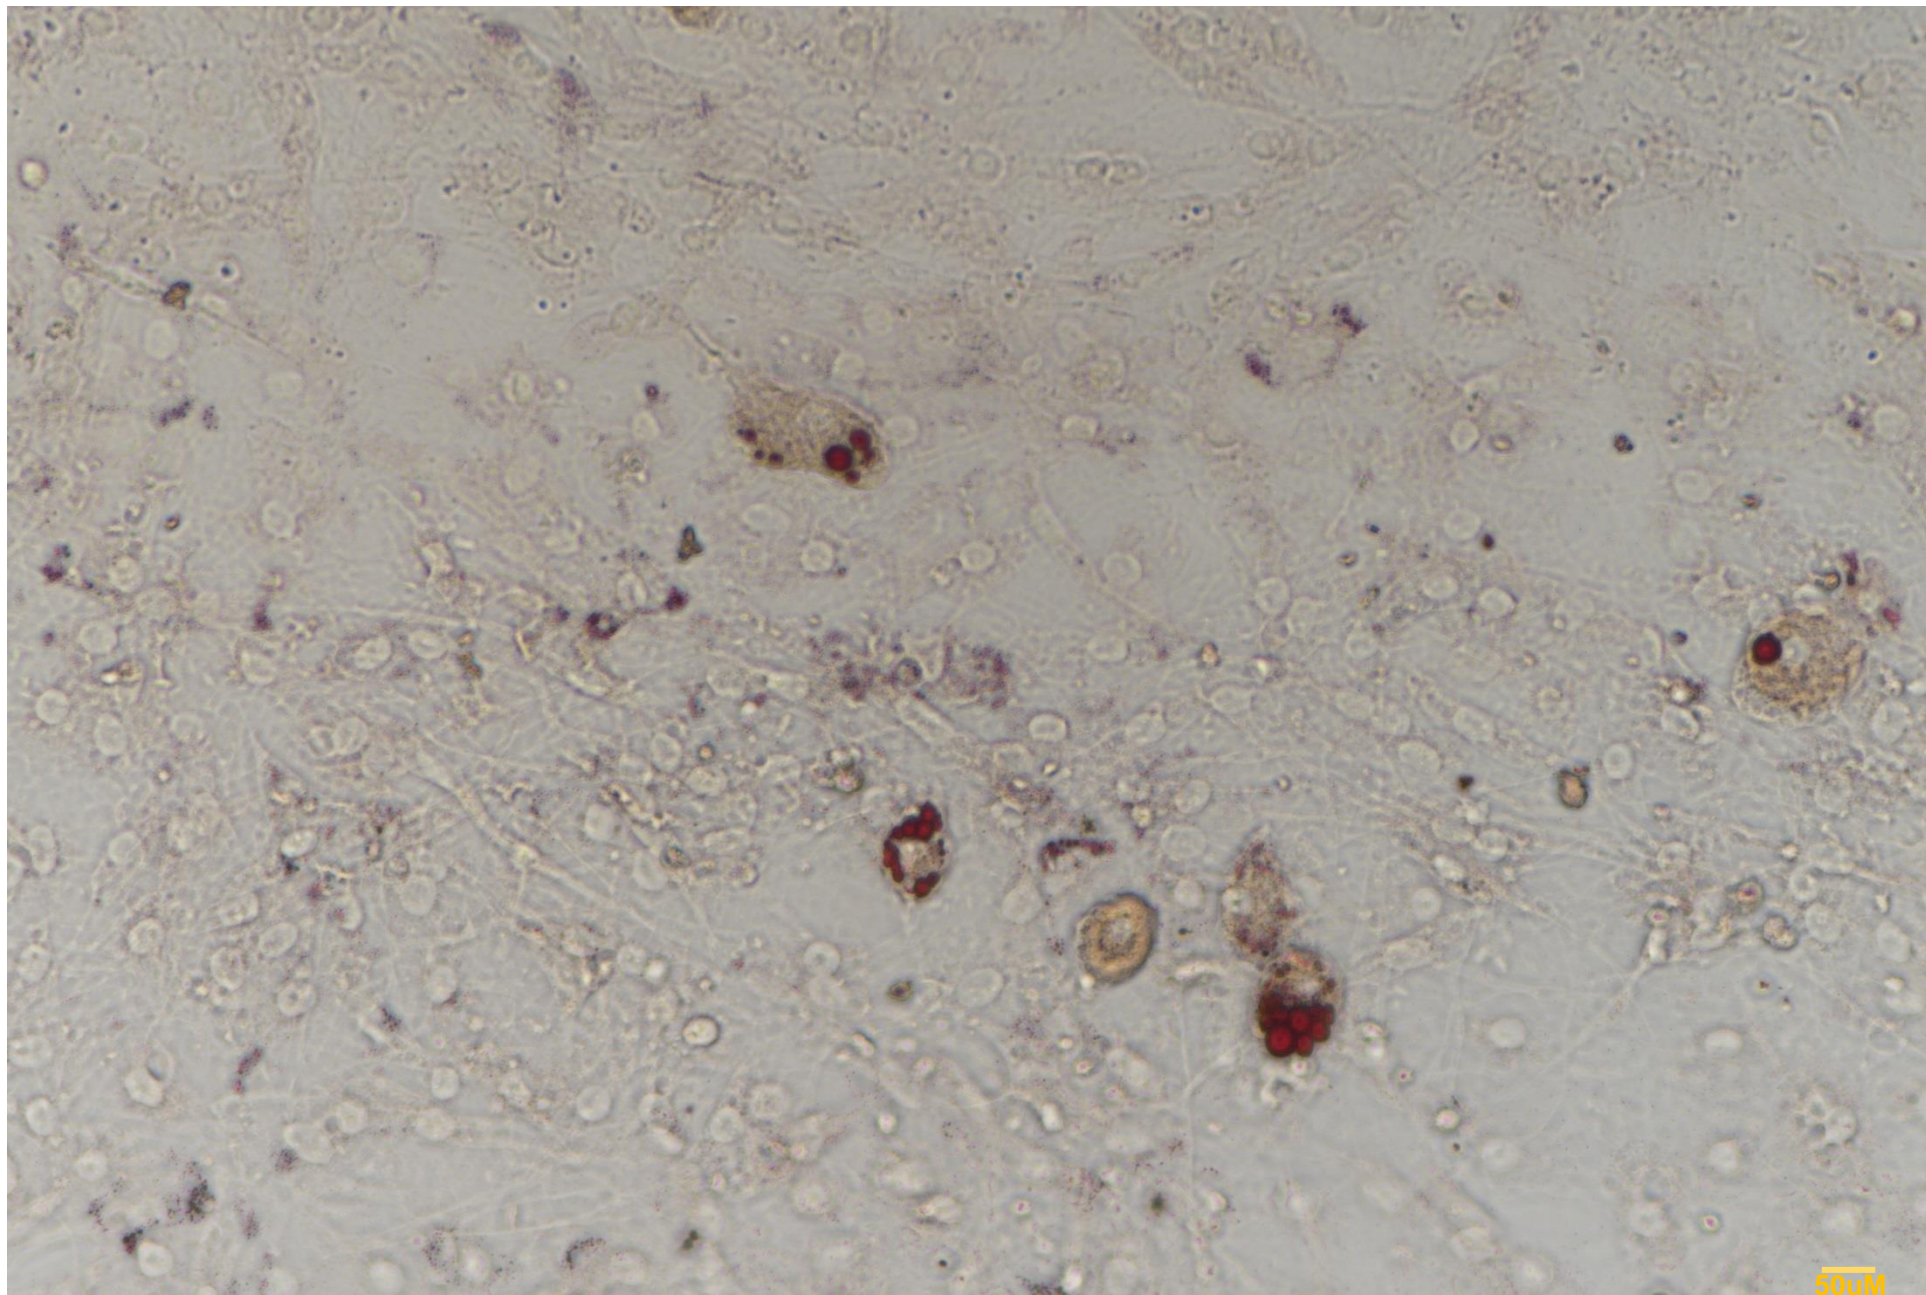



**D-0 AM (LG)**

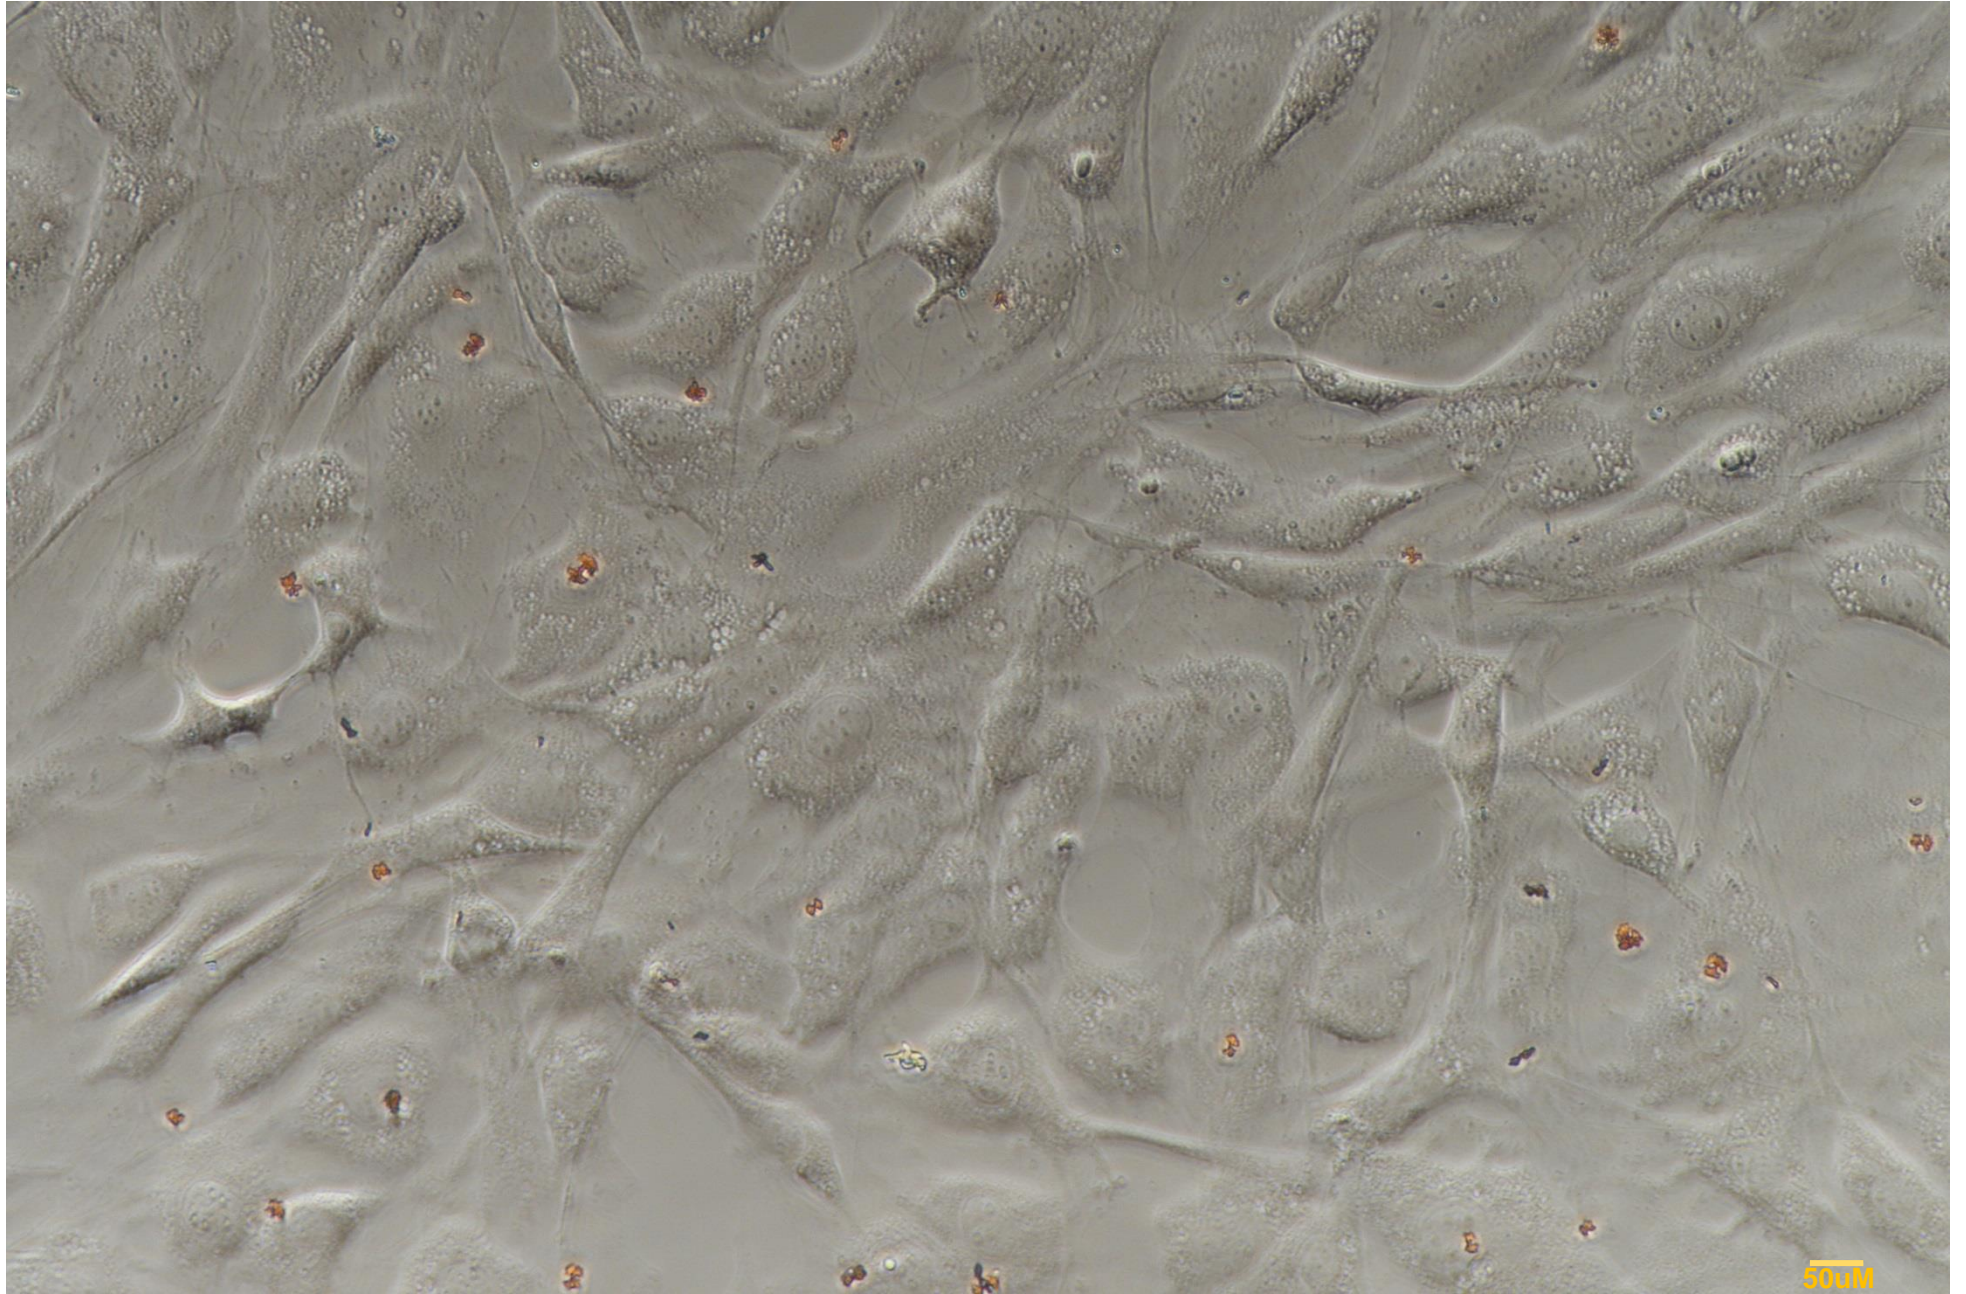

**D-8 AM (LG)**

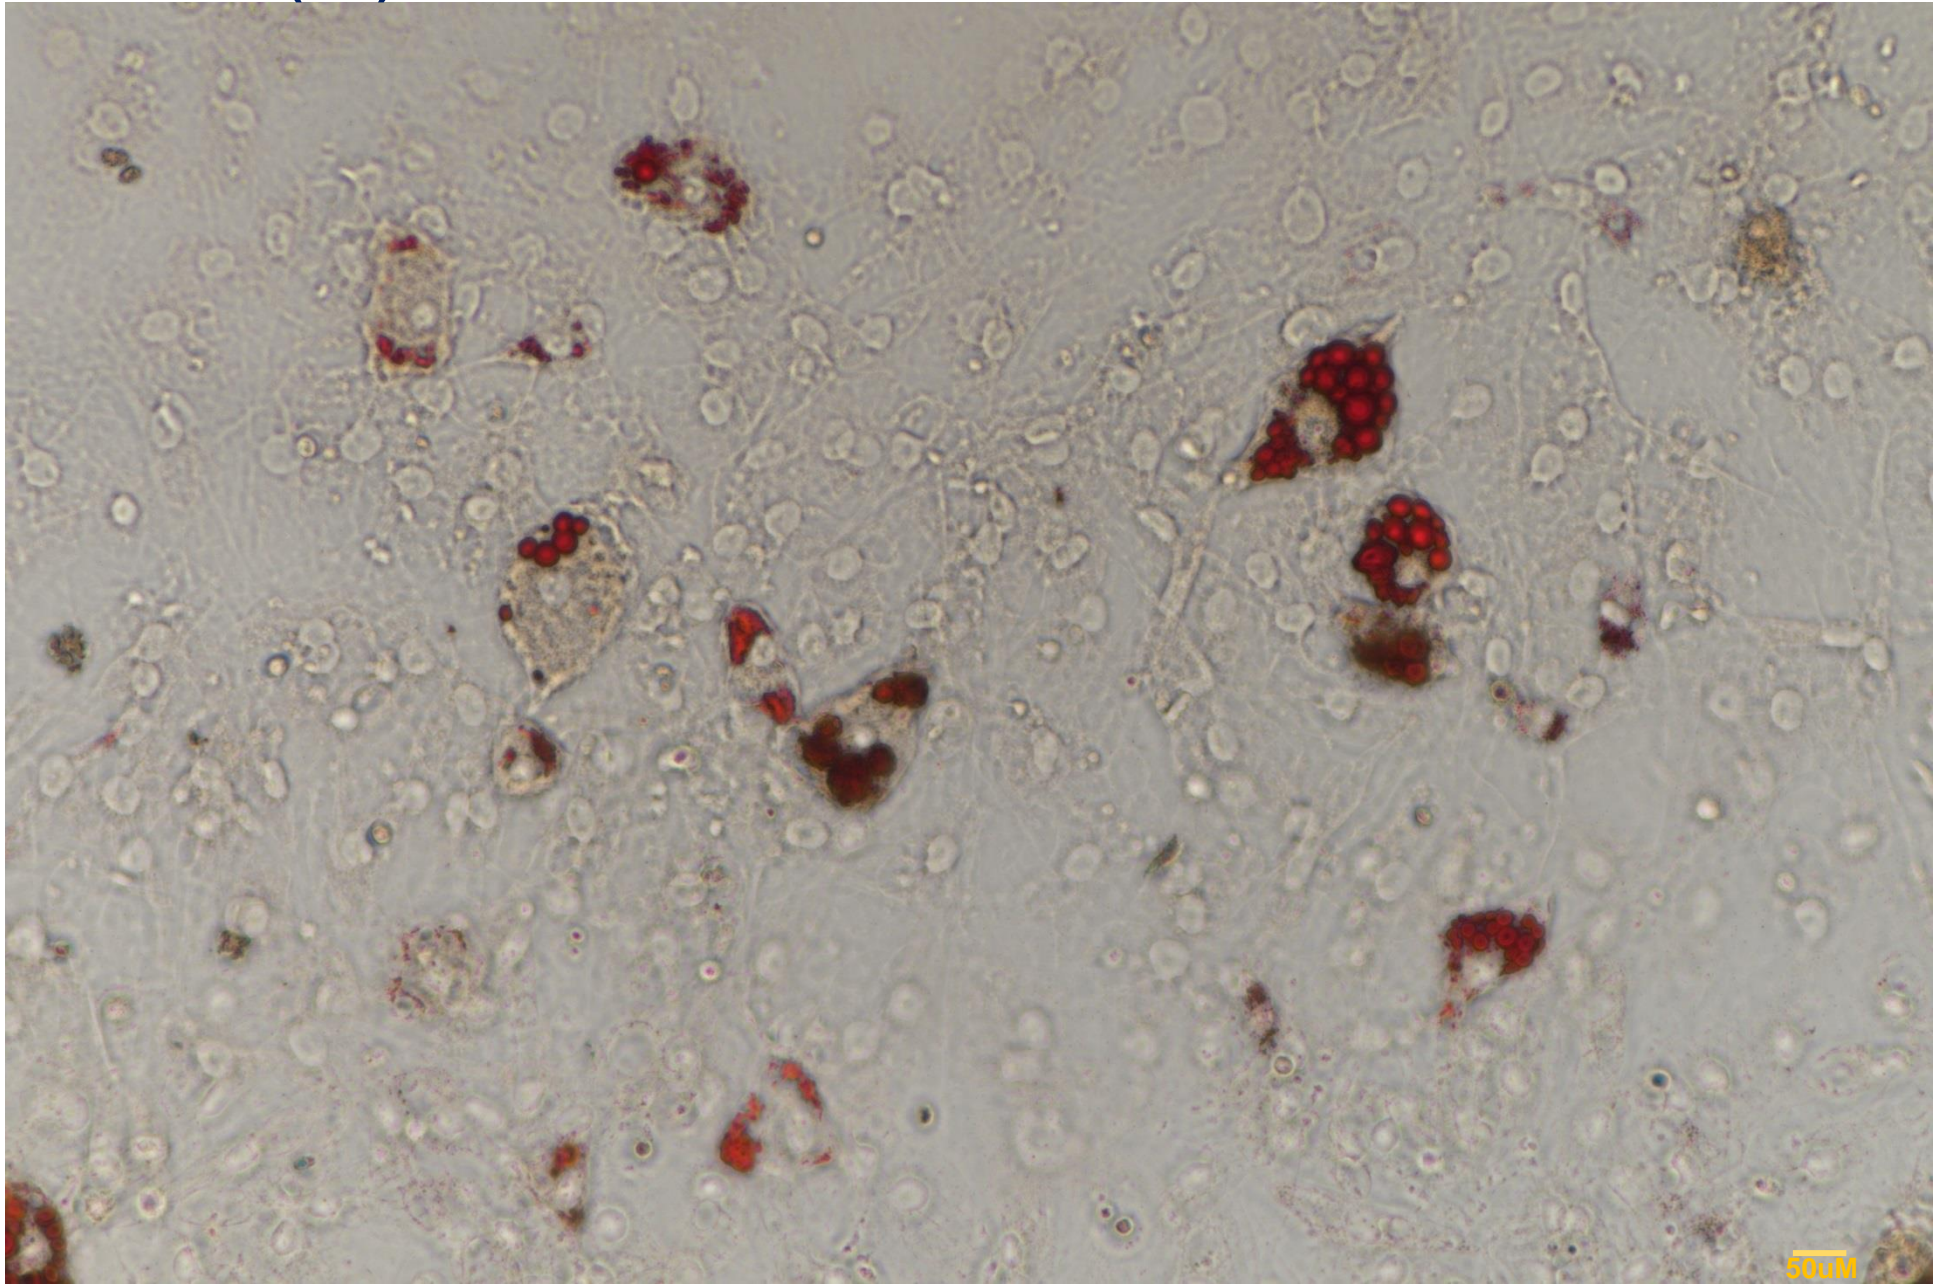

D-0 AM (HG)

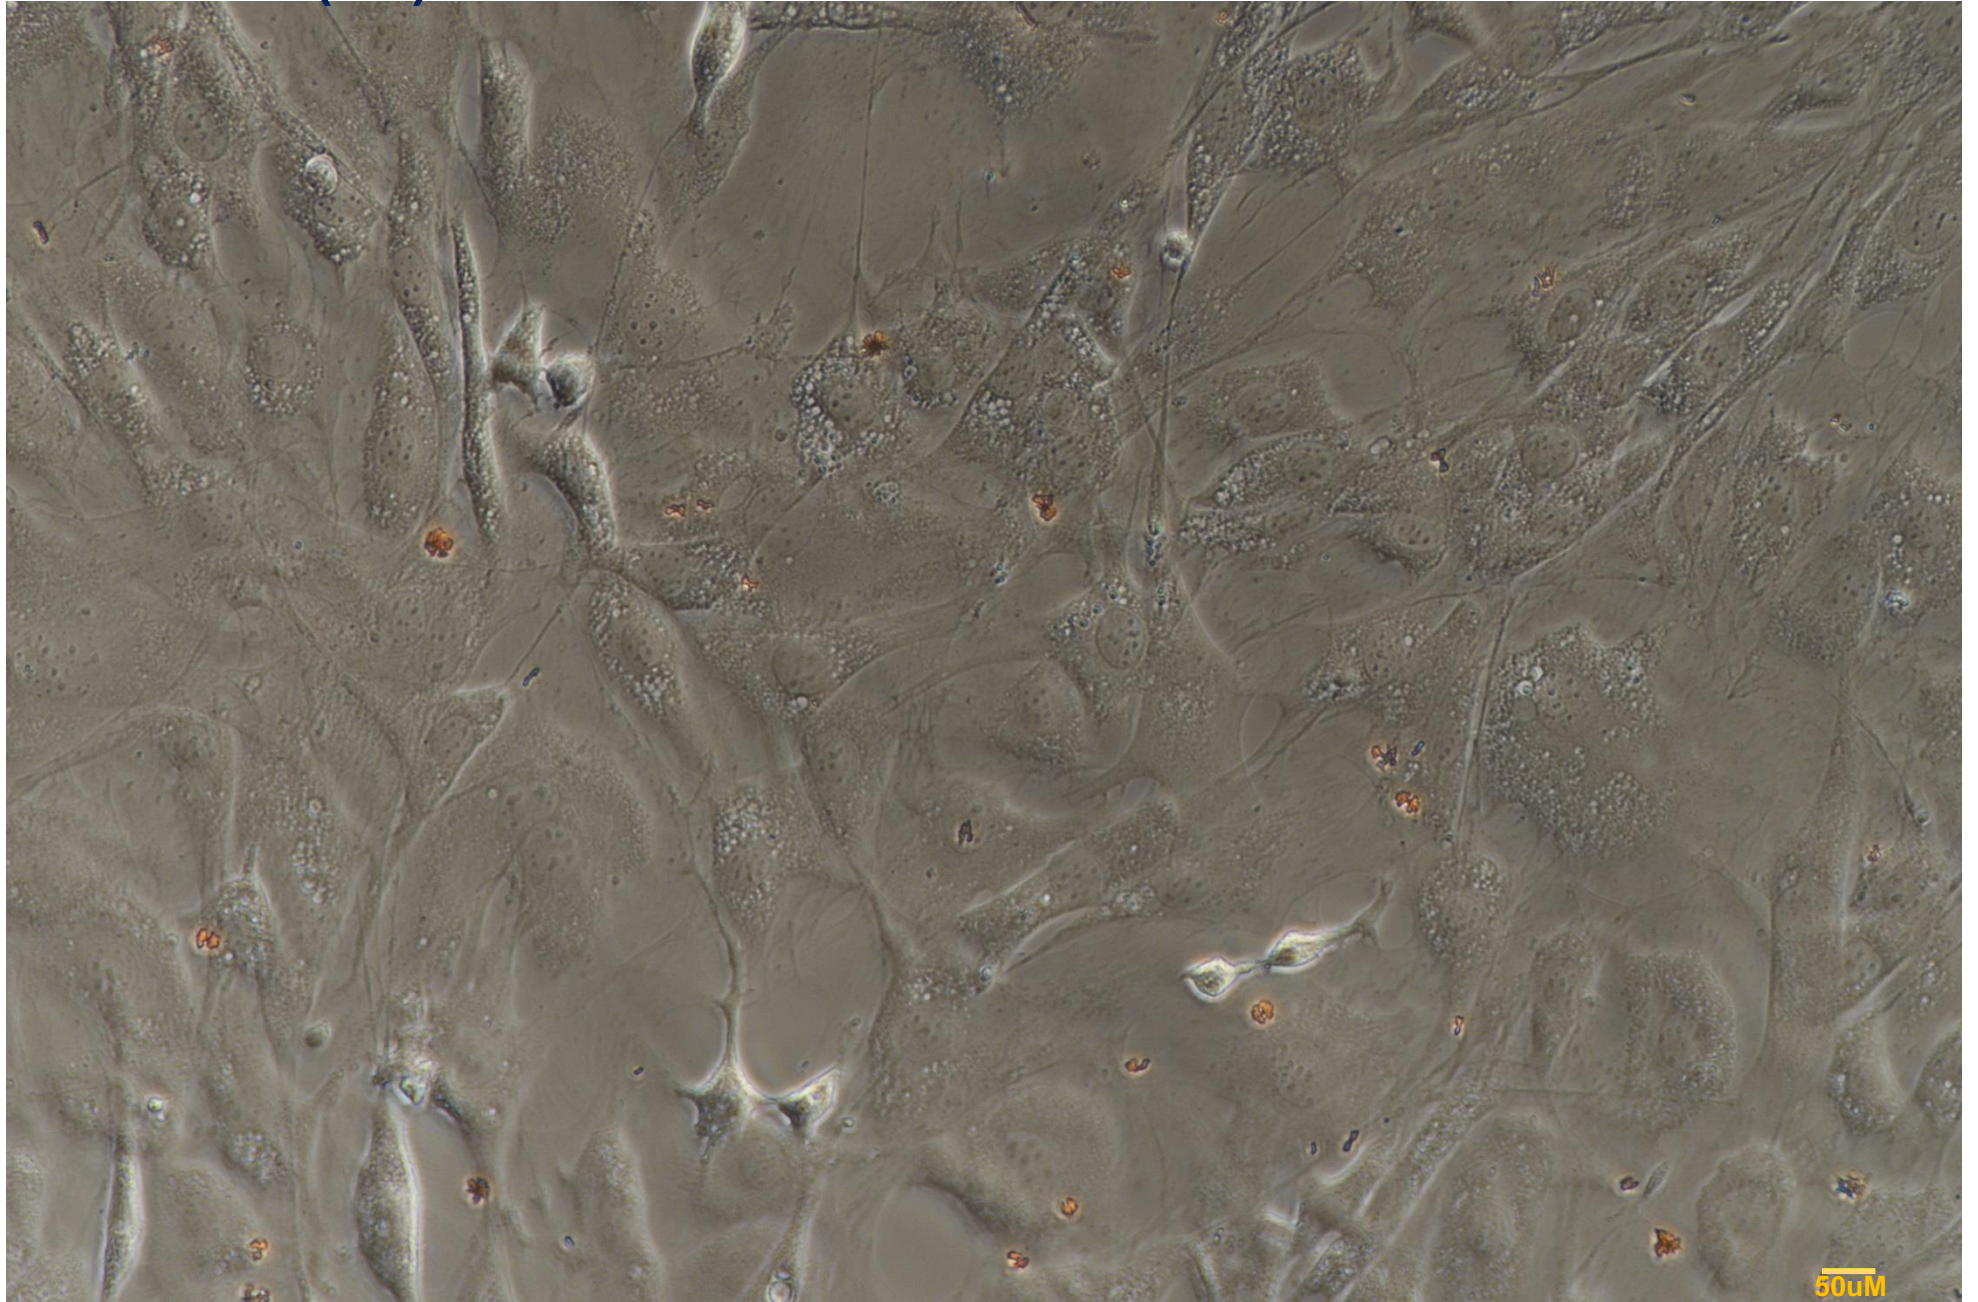

D-8 AM (HG)

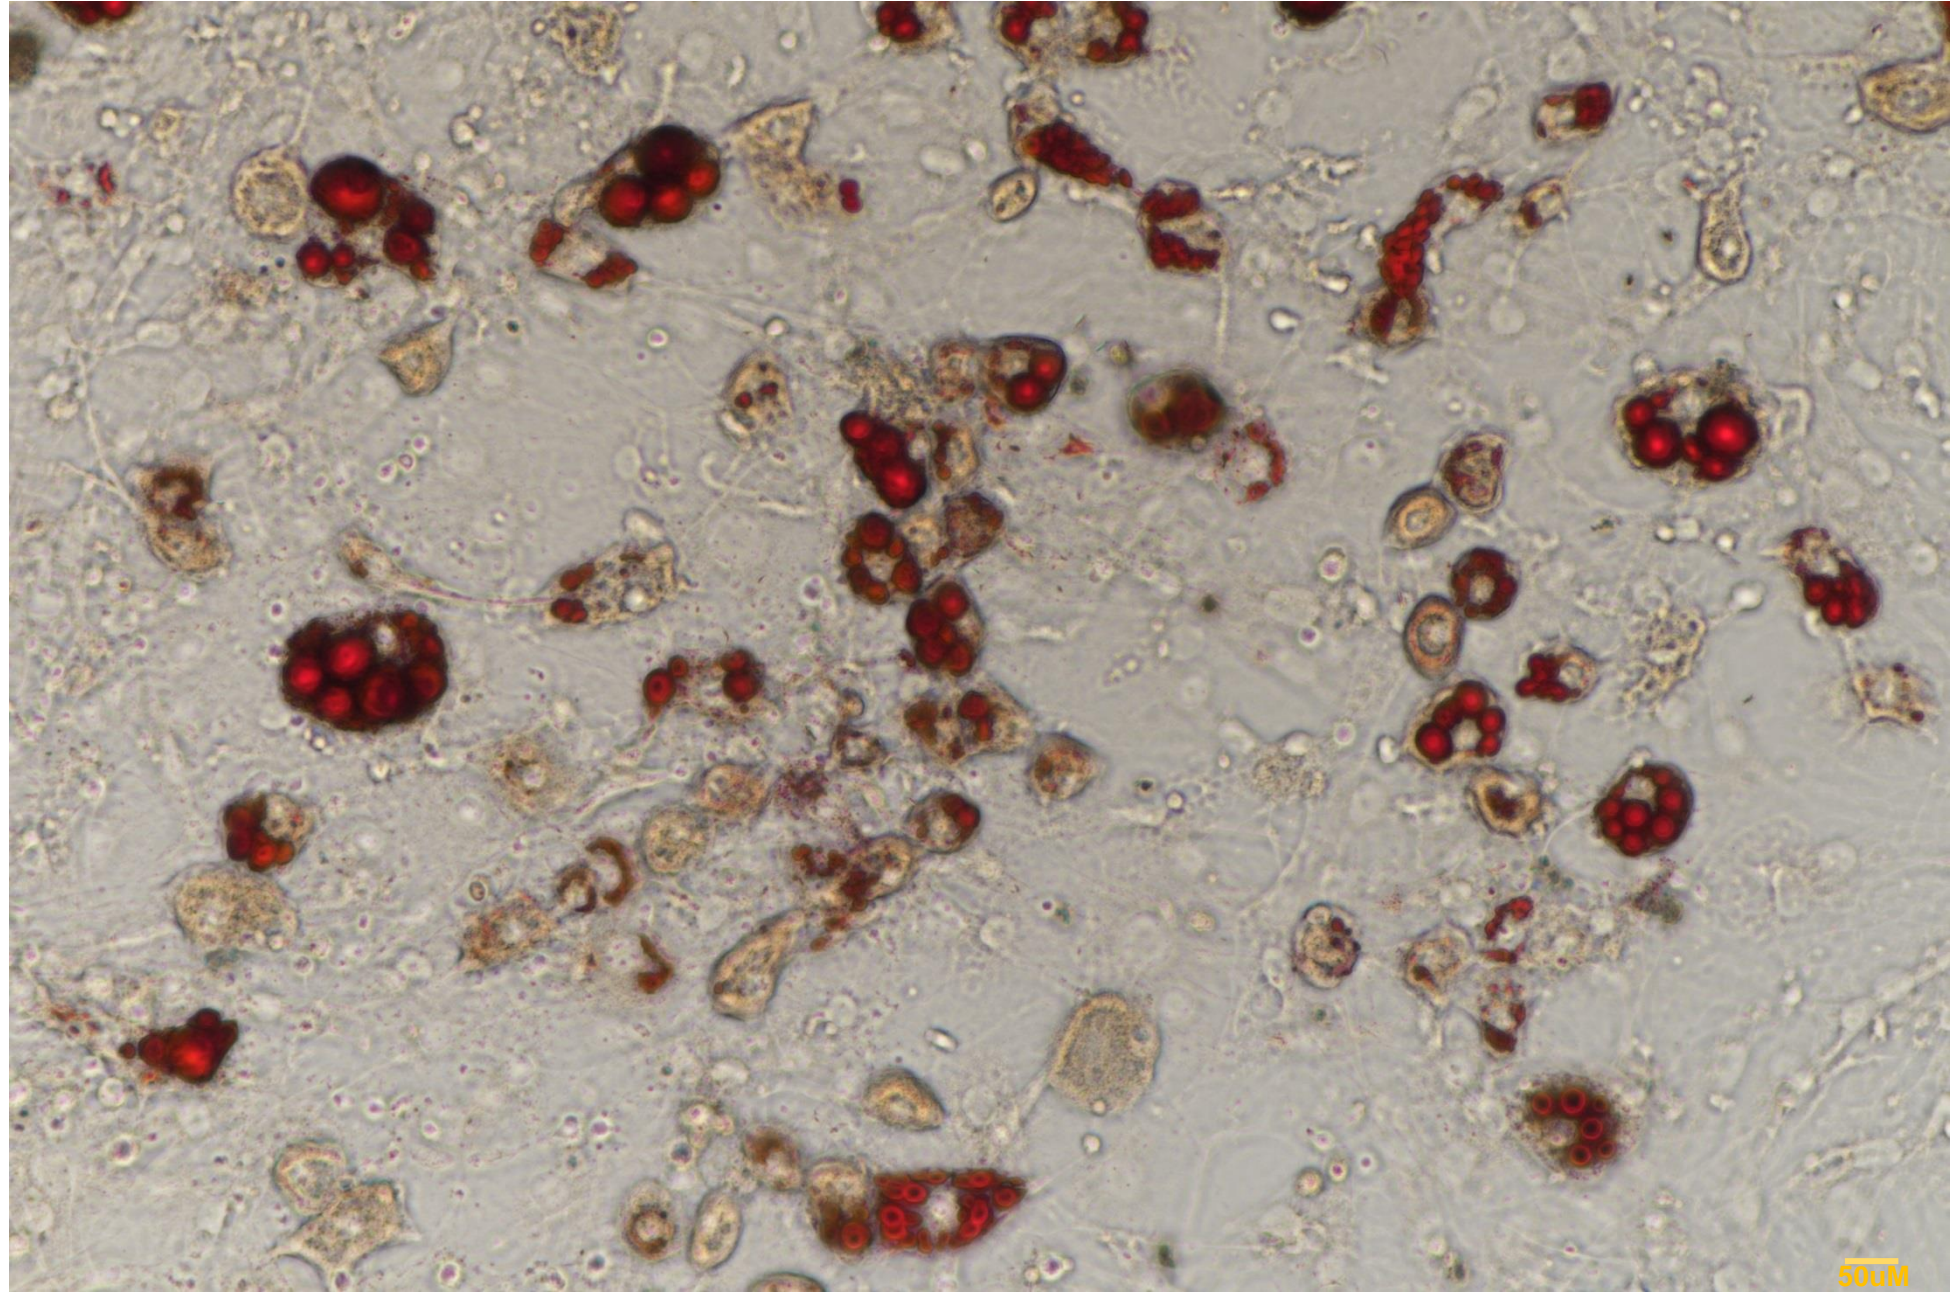

50µM

**D-0 AM (HG + LiCl)**

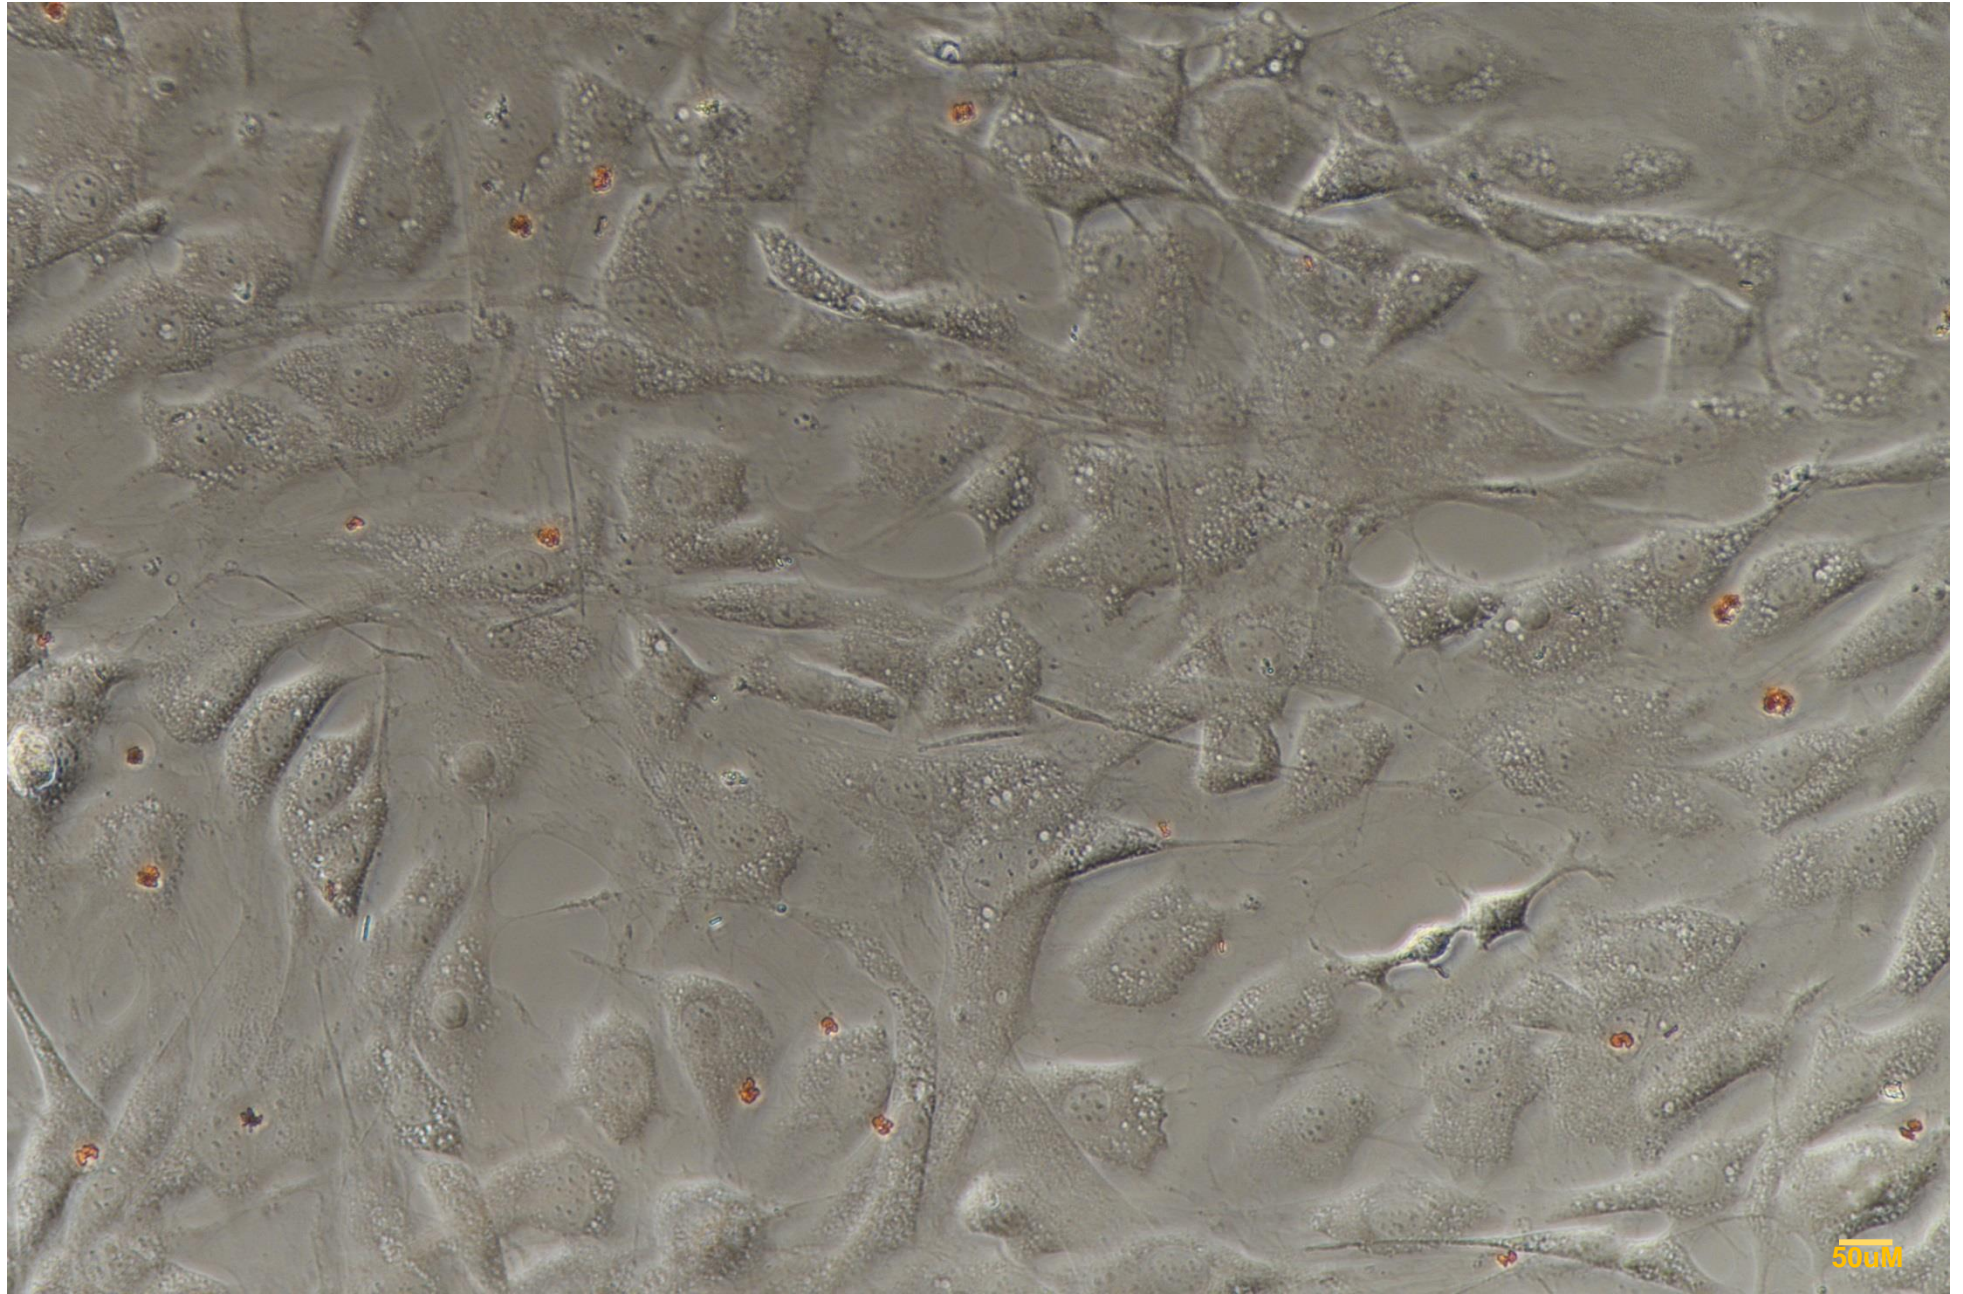

**D-8 AM (HG + LiCl)**

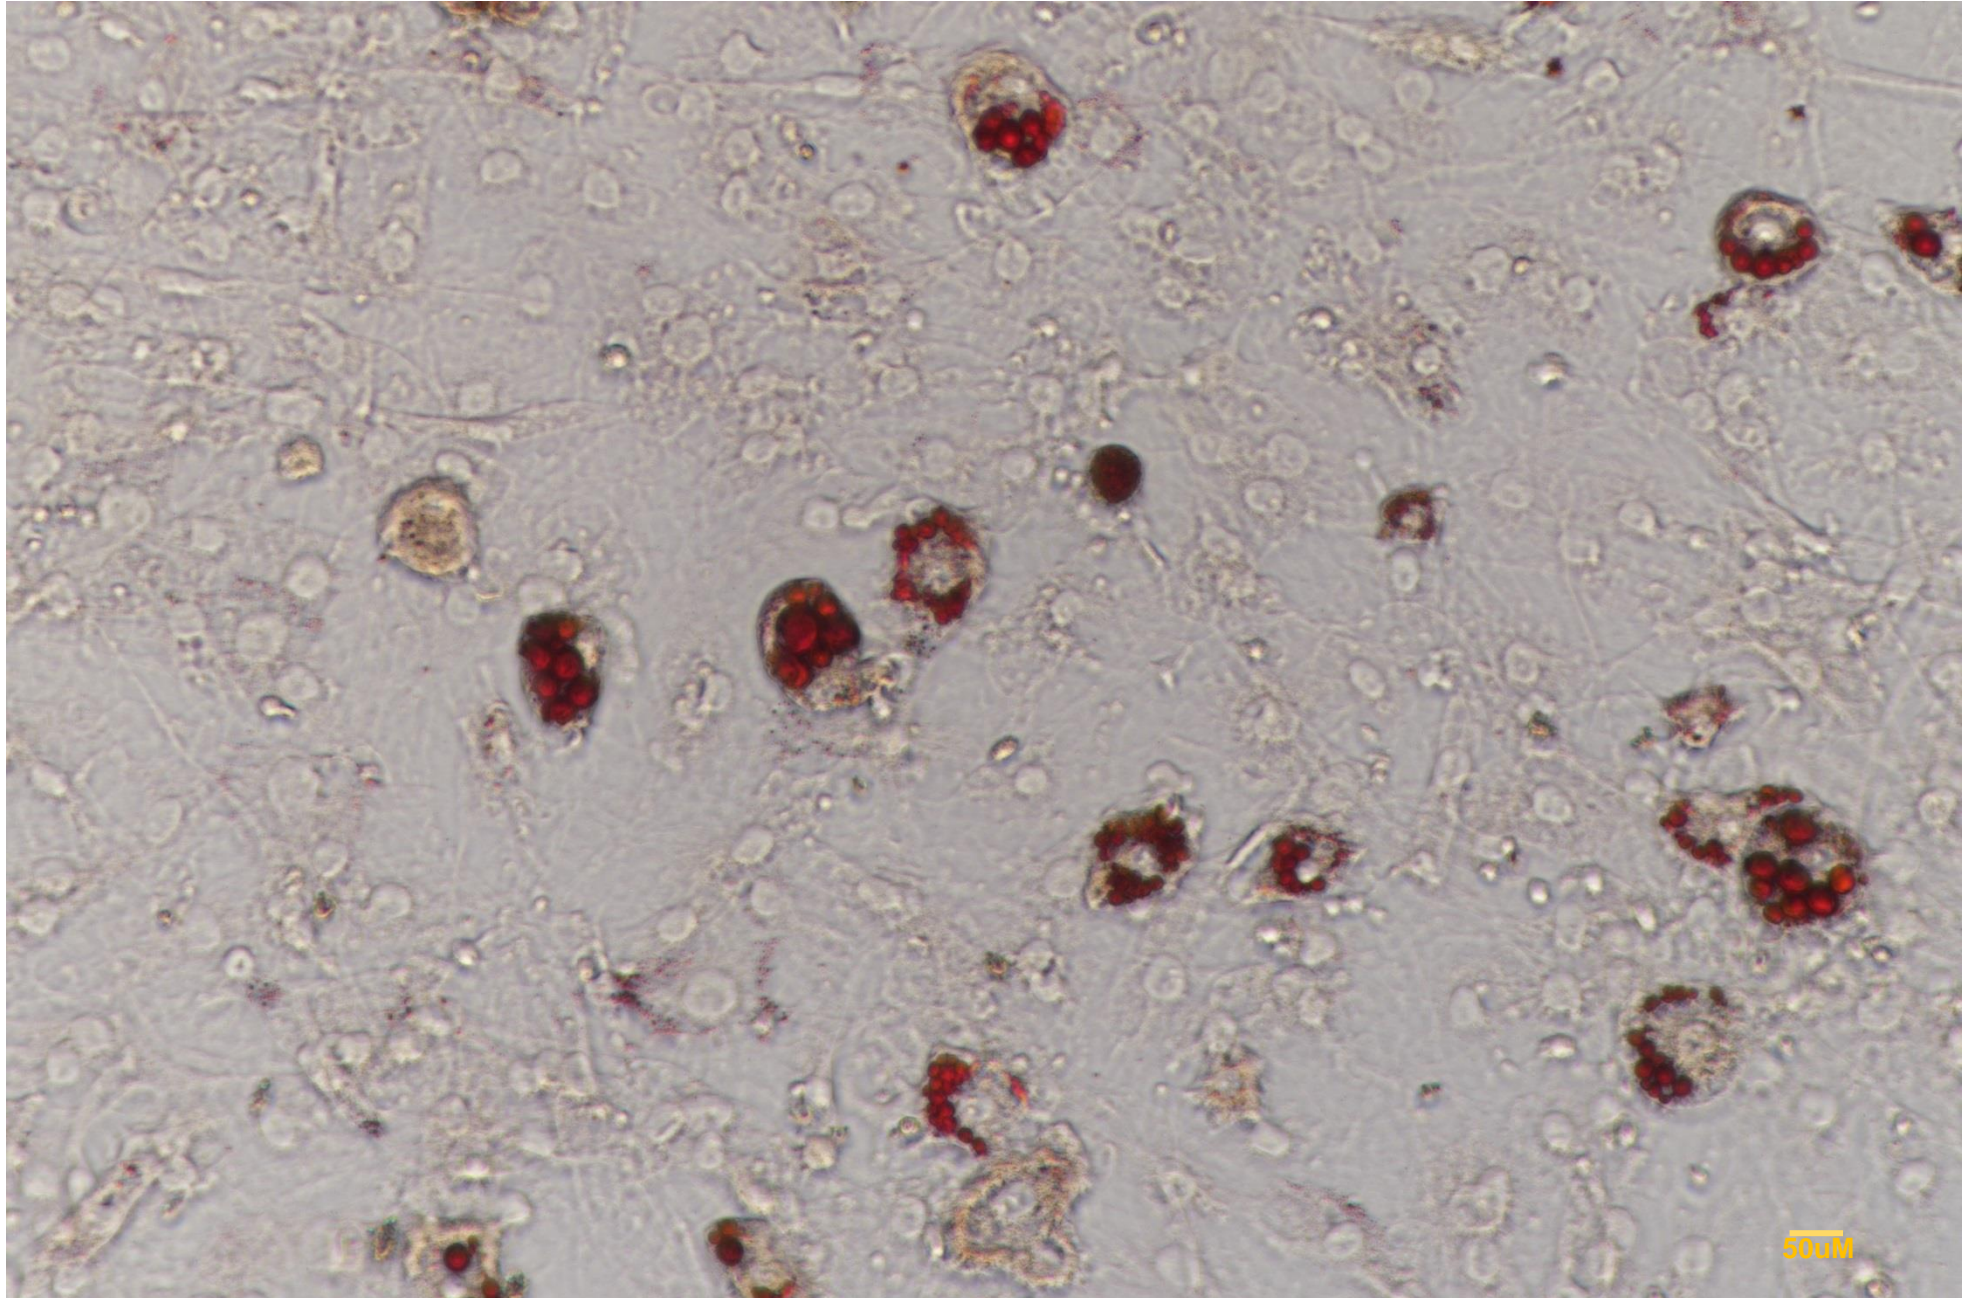

Fig.5 G)

AM

RUNX2

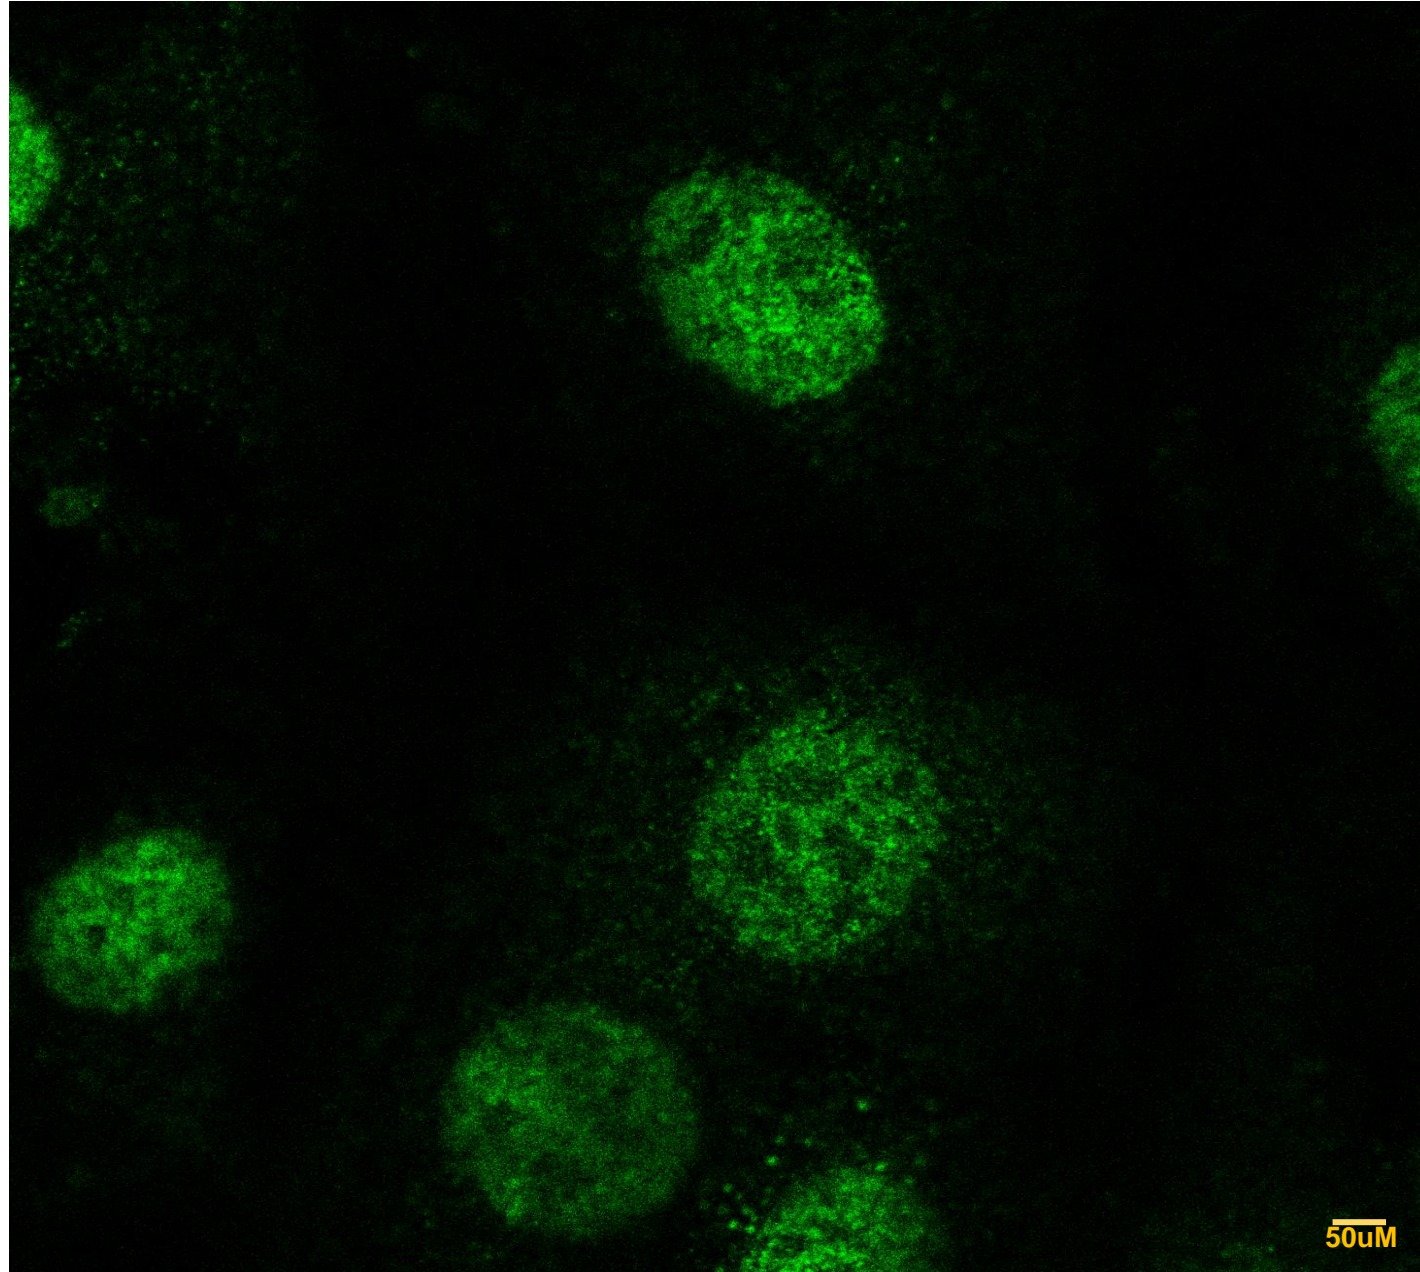

50μM

AM (HG) RUNX2

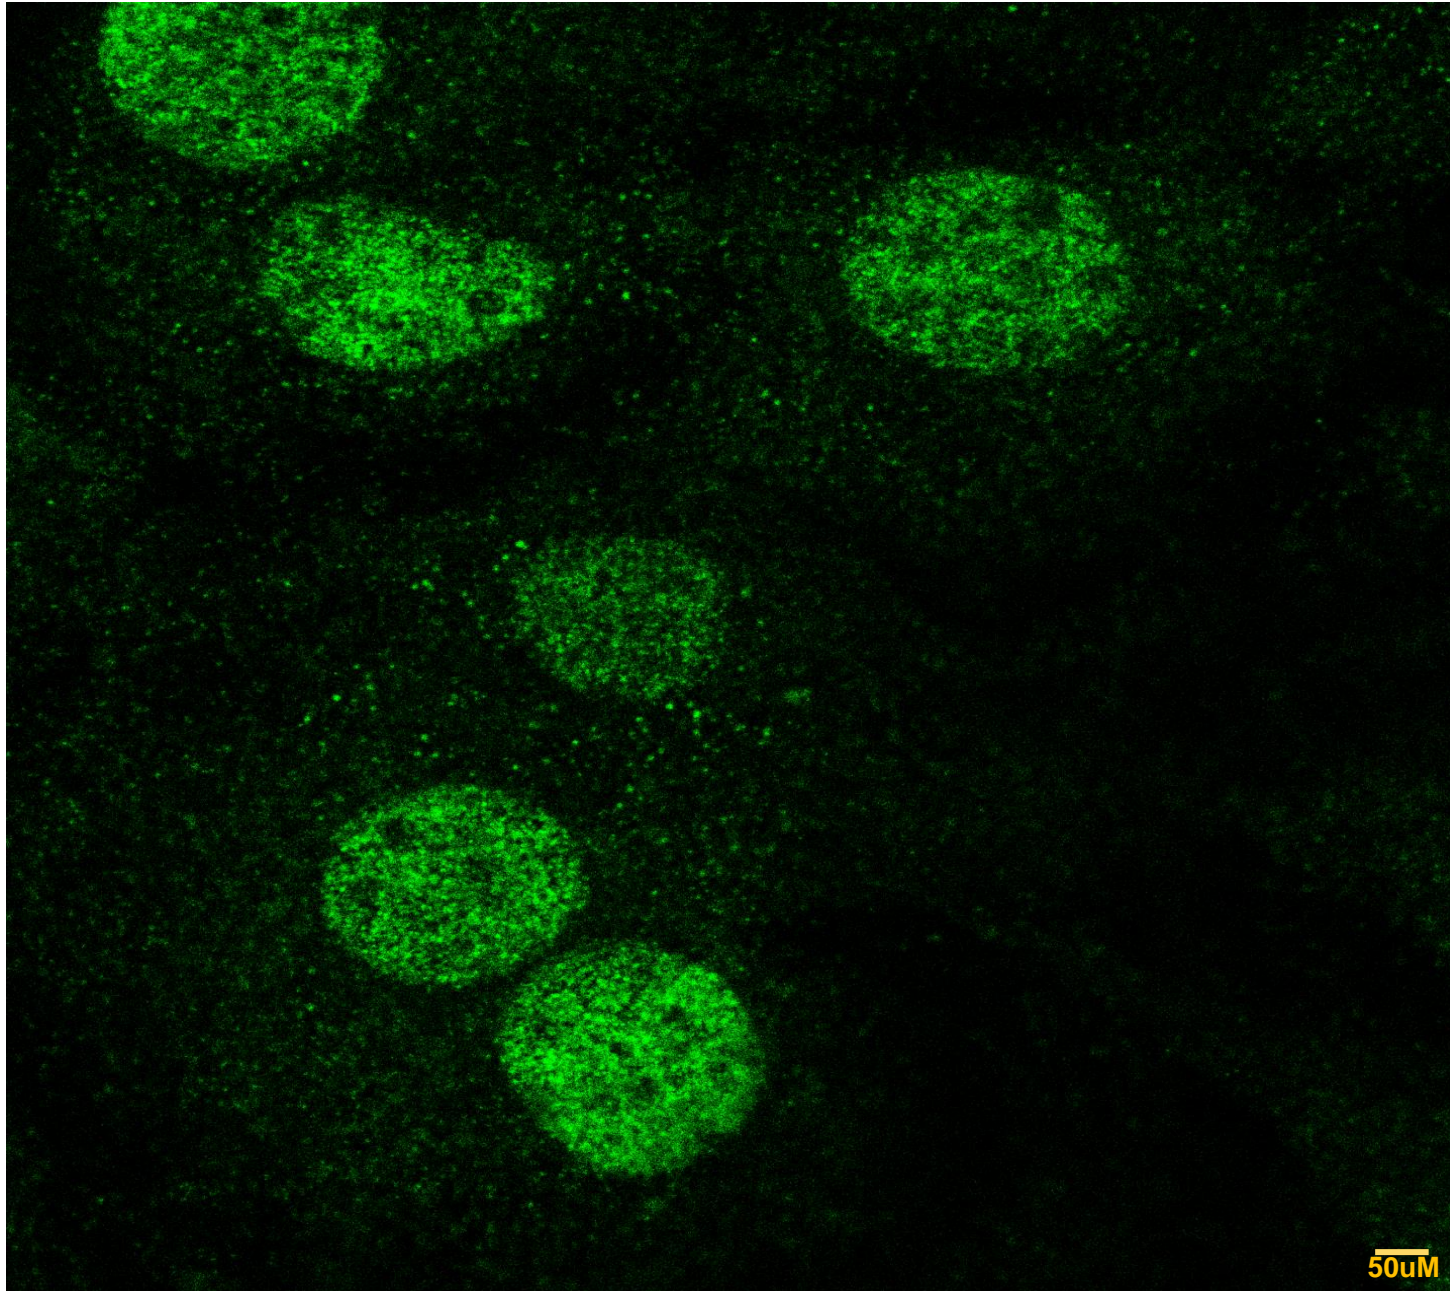

50μm



AM (LG) RUNX2

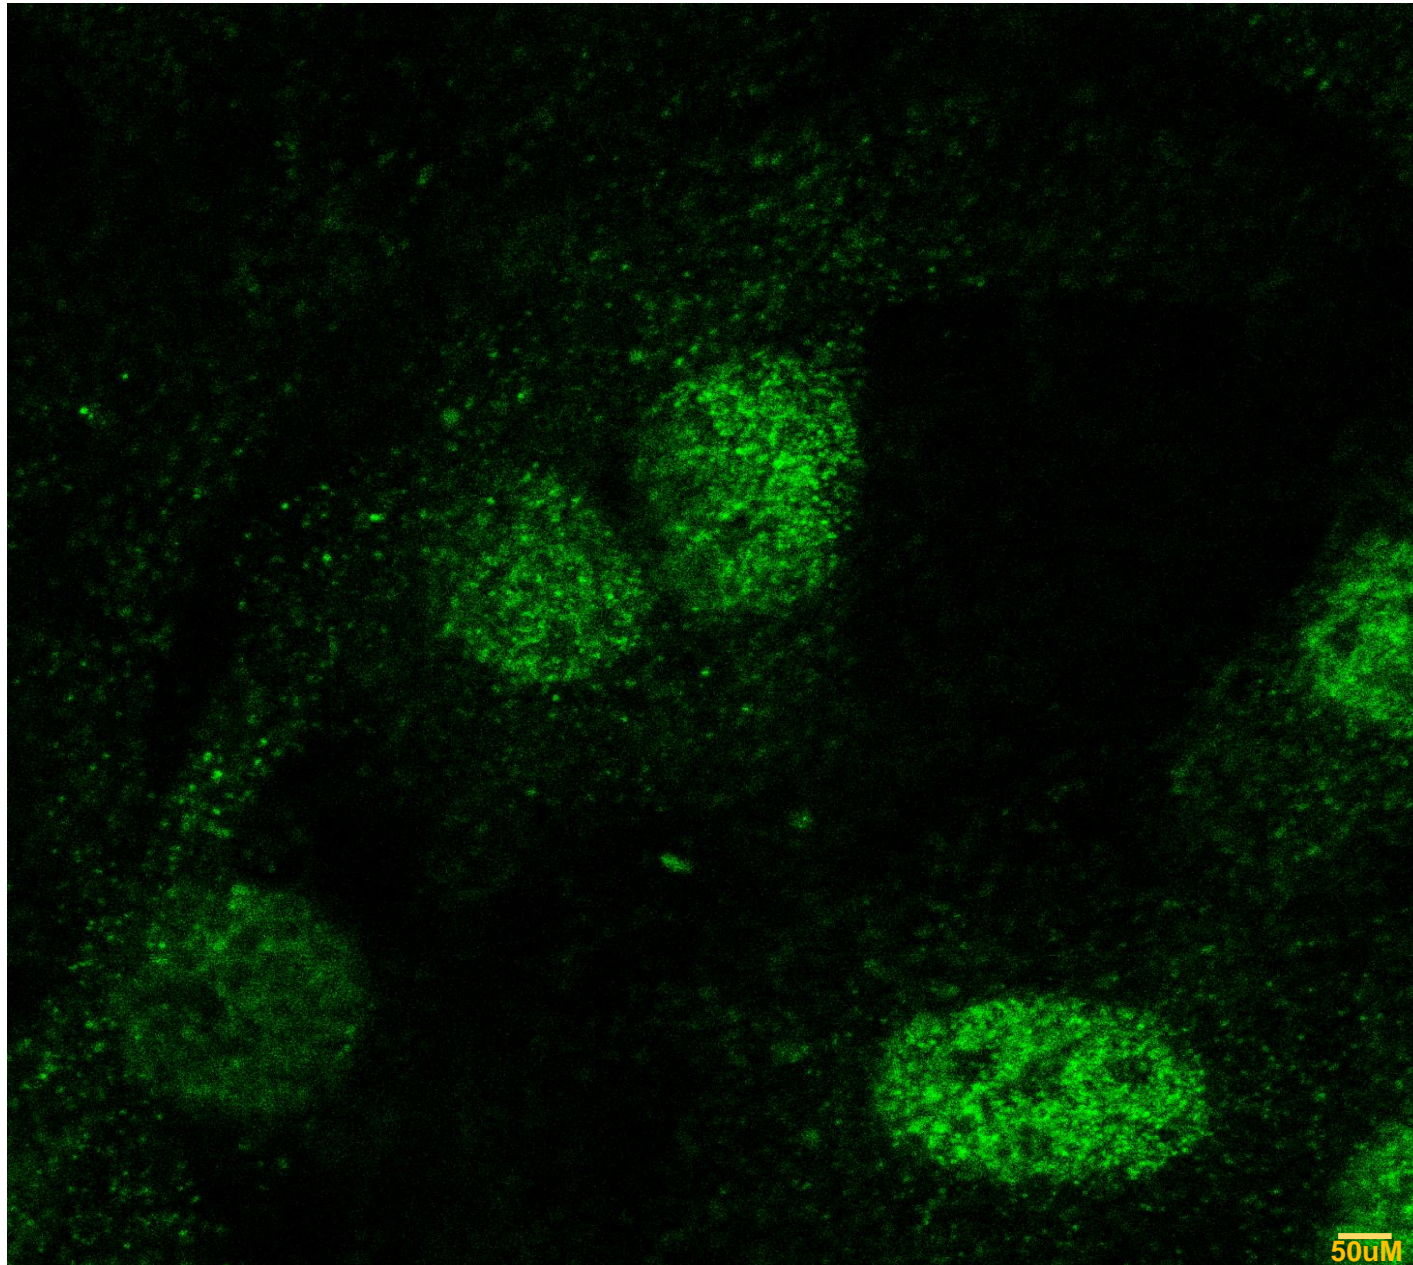

AM (HG, noGlut) RUNX2

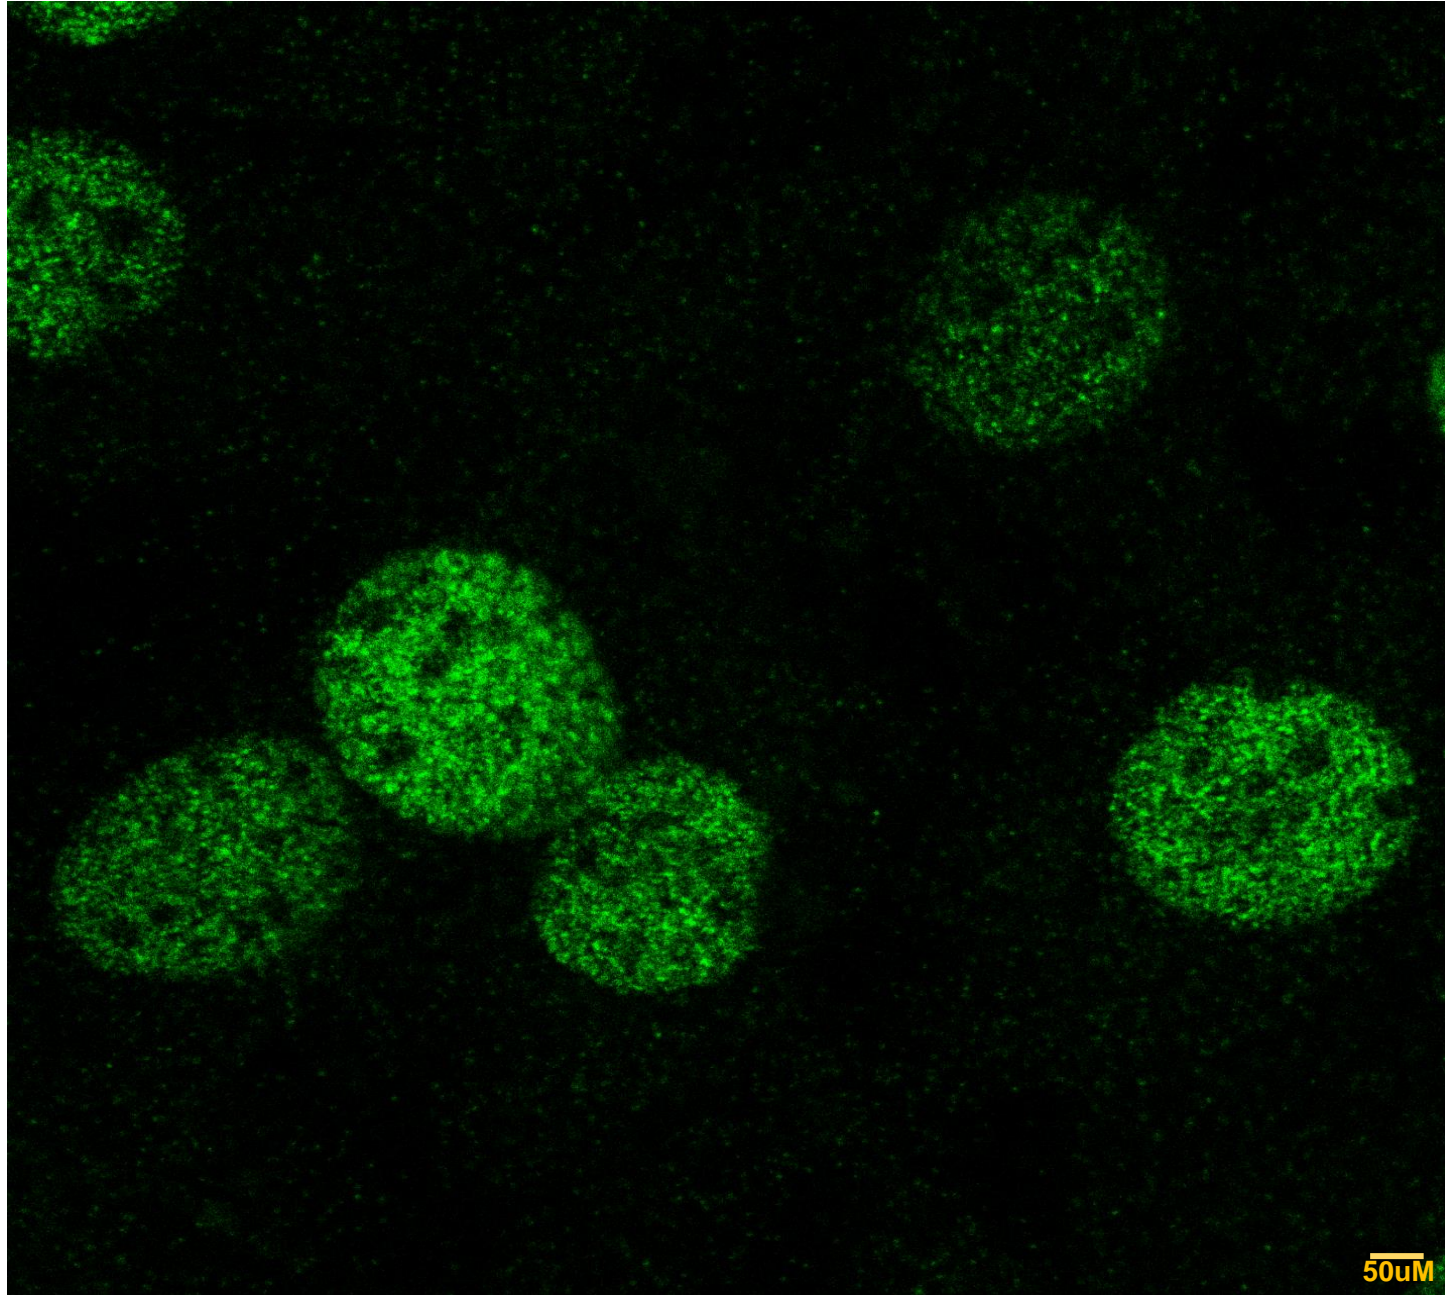

AM (LG, HGlut)

RUNX2

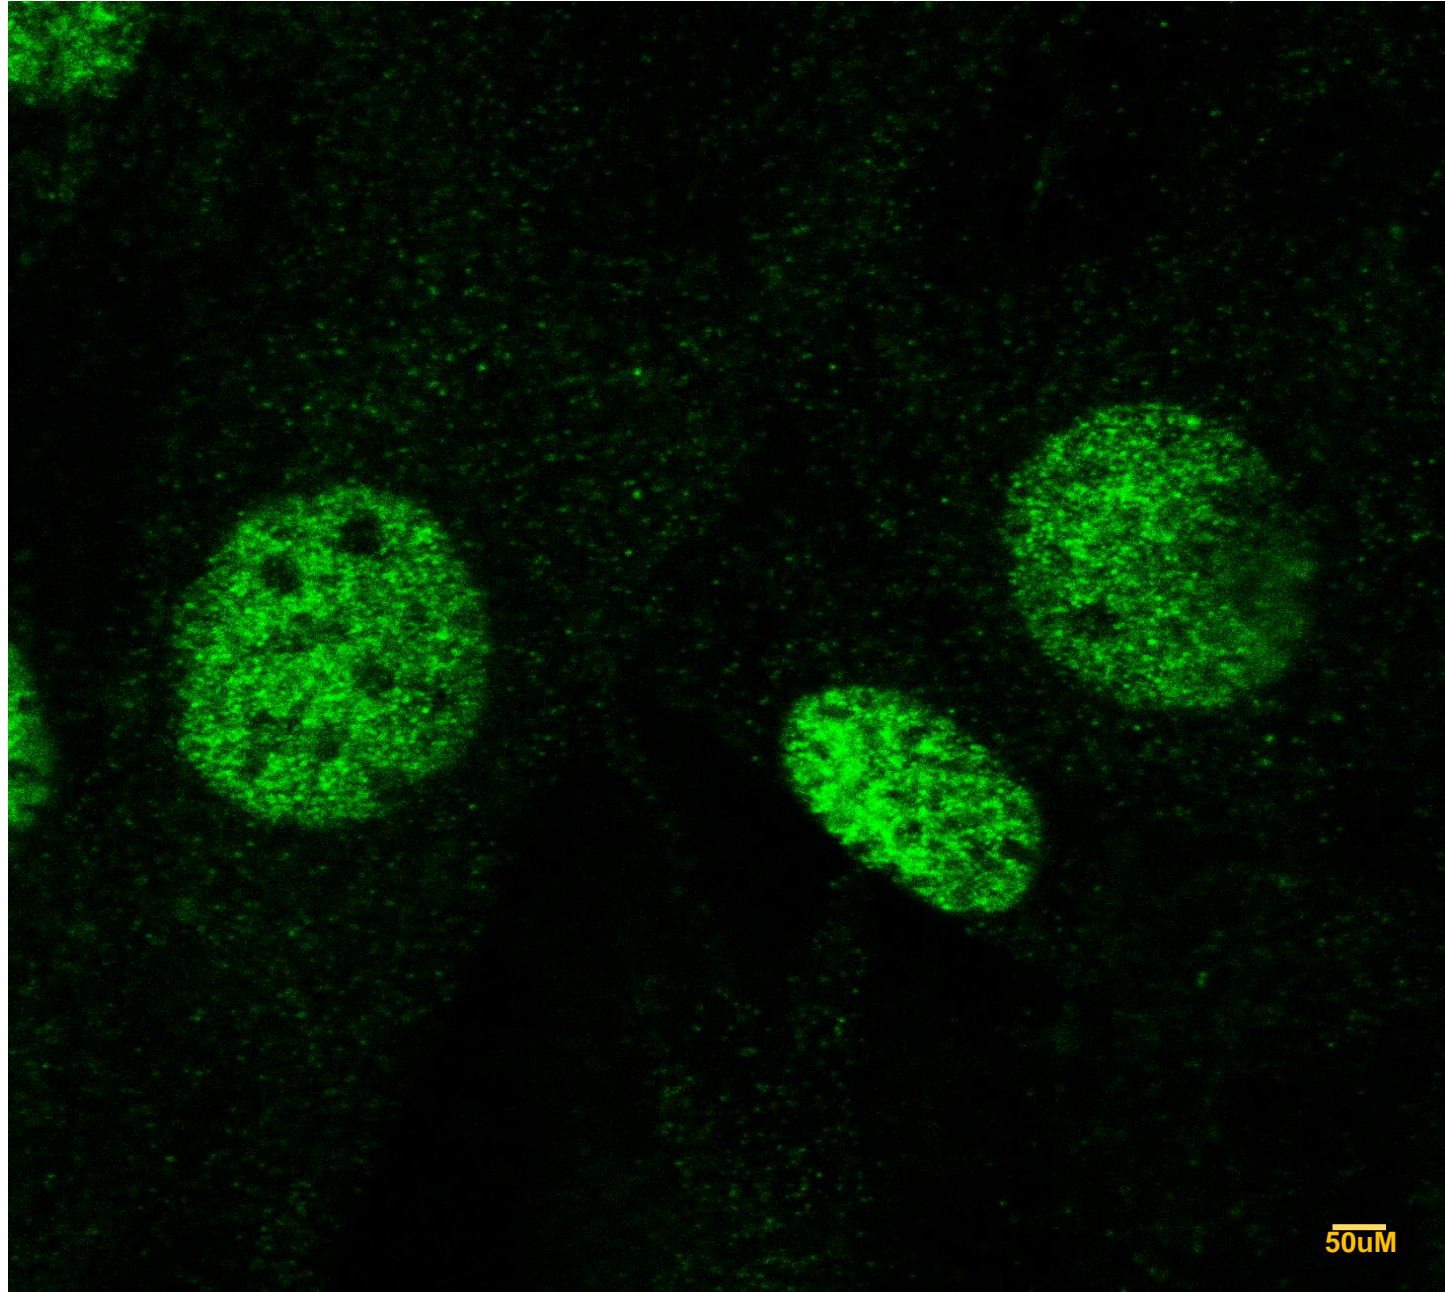

50μm

AM

GSK3 $\beta$

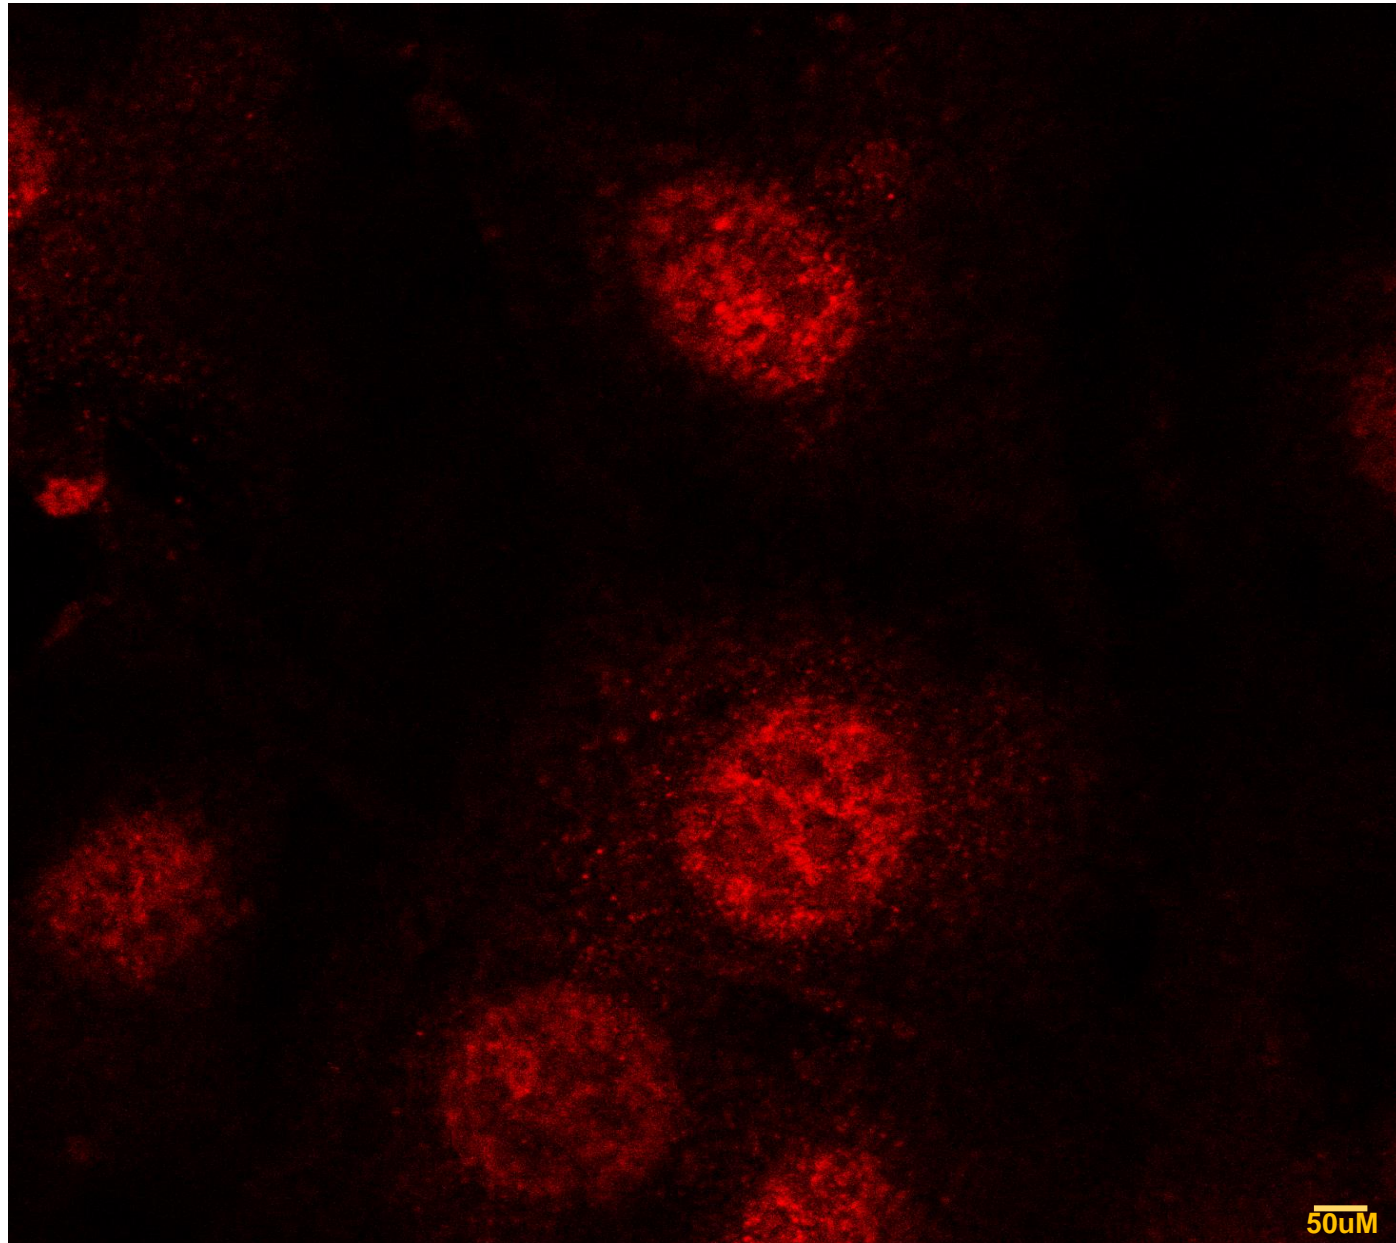

50 $\mu$ m

AM (HG)

GSK3 $\beta$

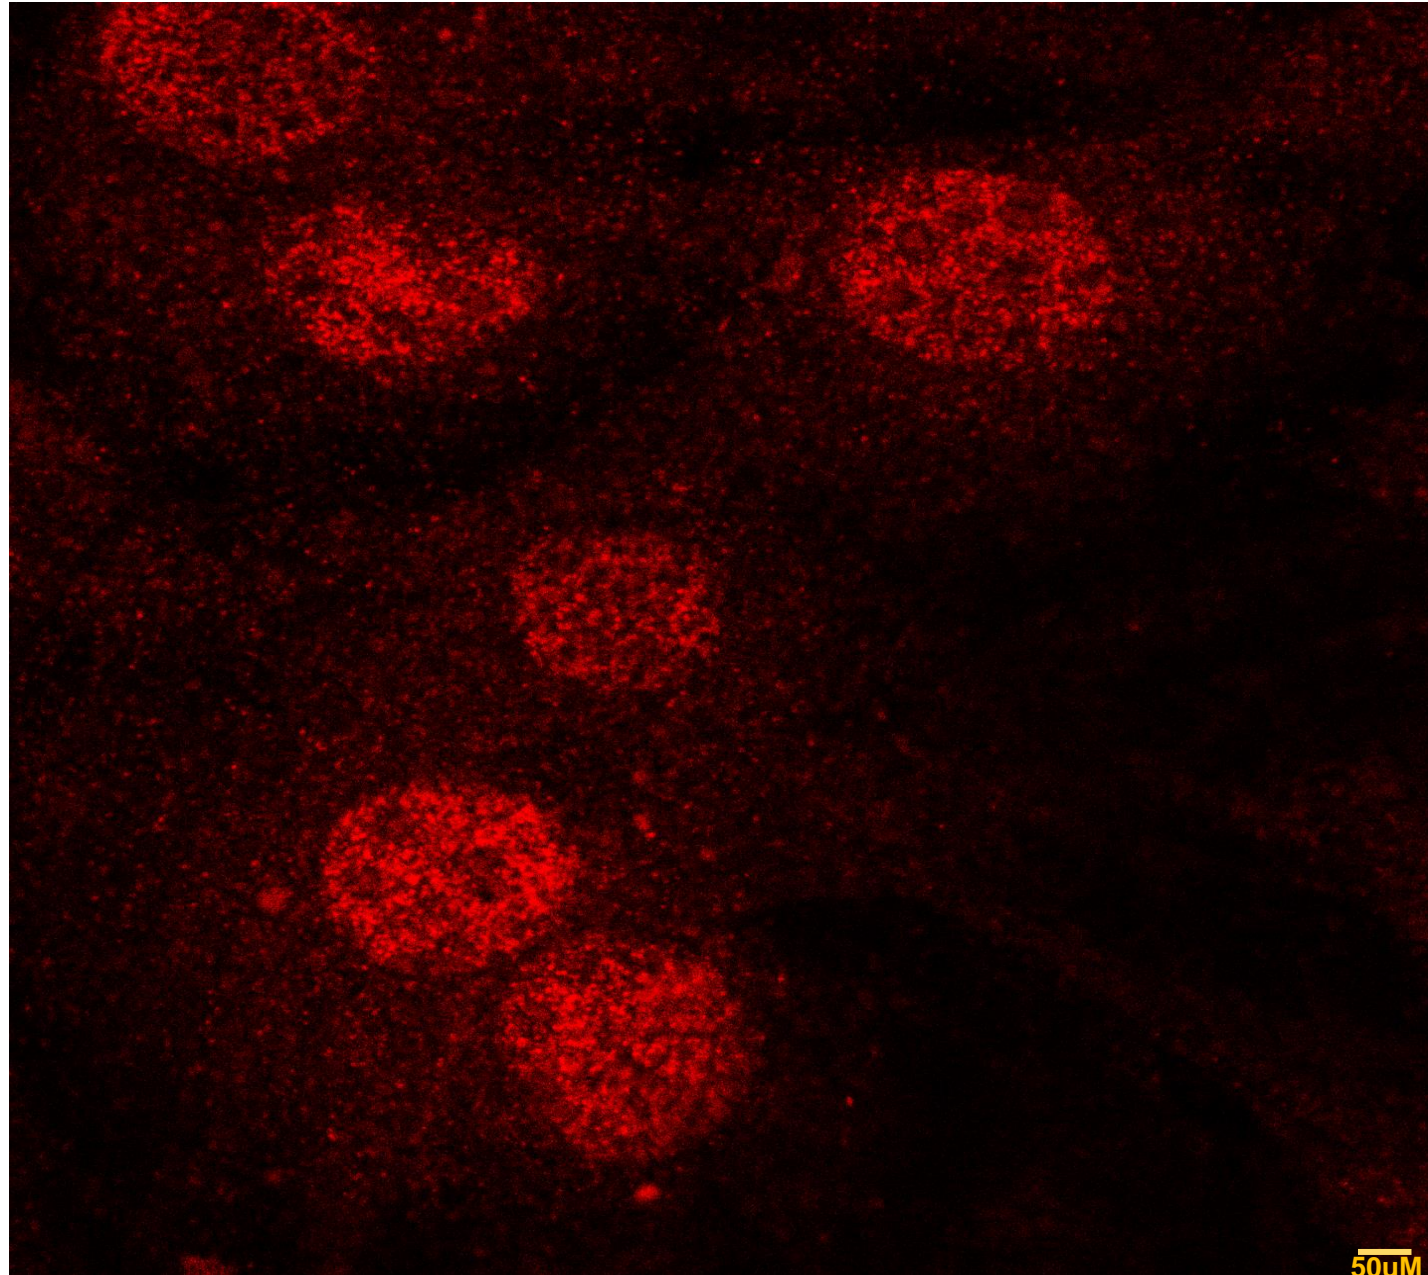

50 $\mu$ m

AM (LG)

GSK3 $\beta$

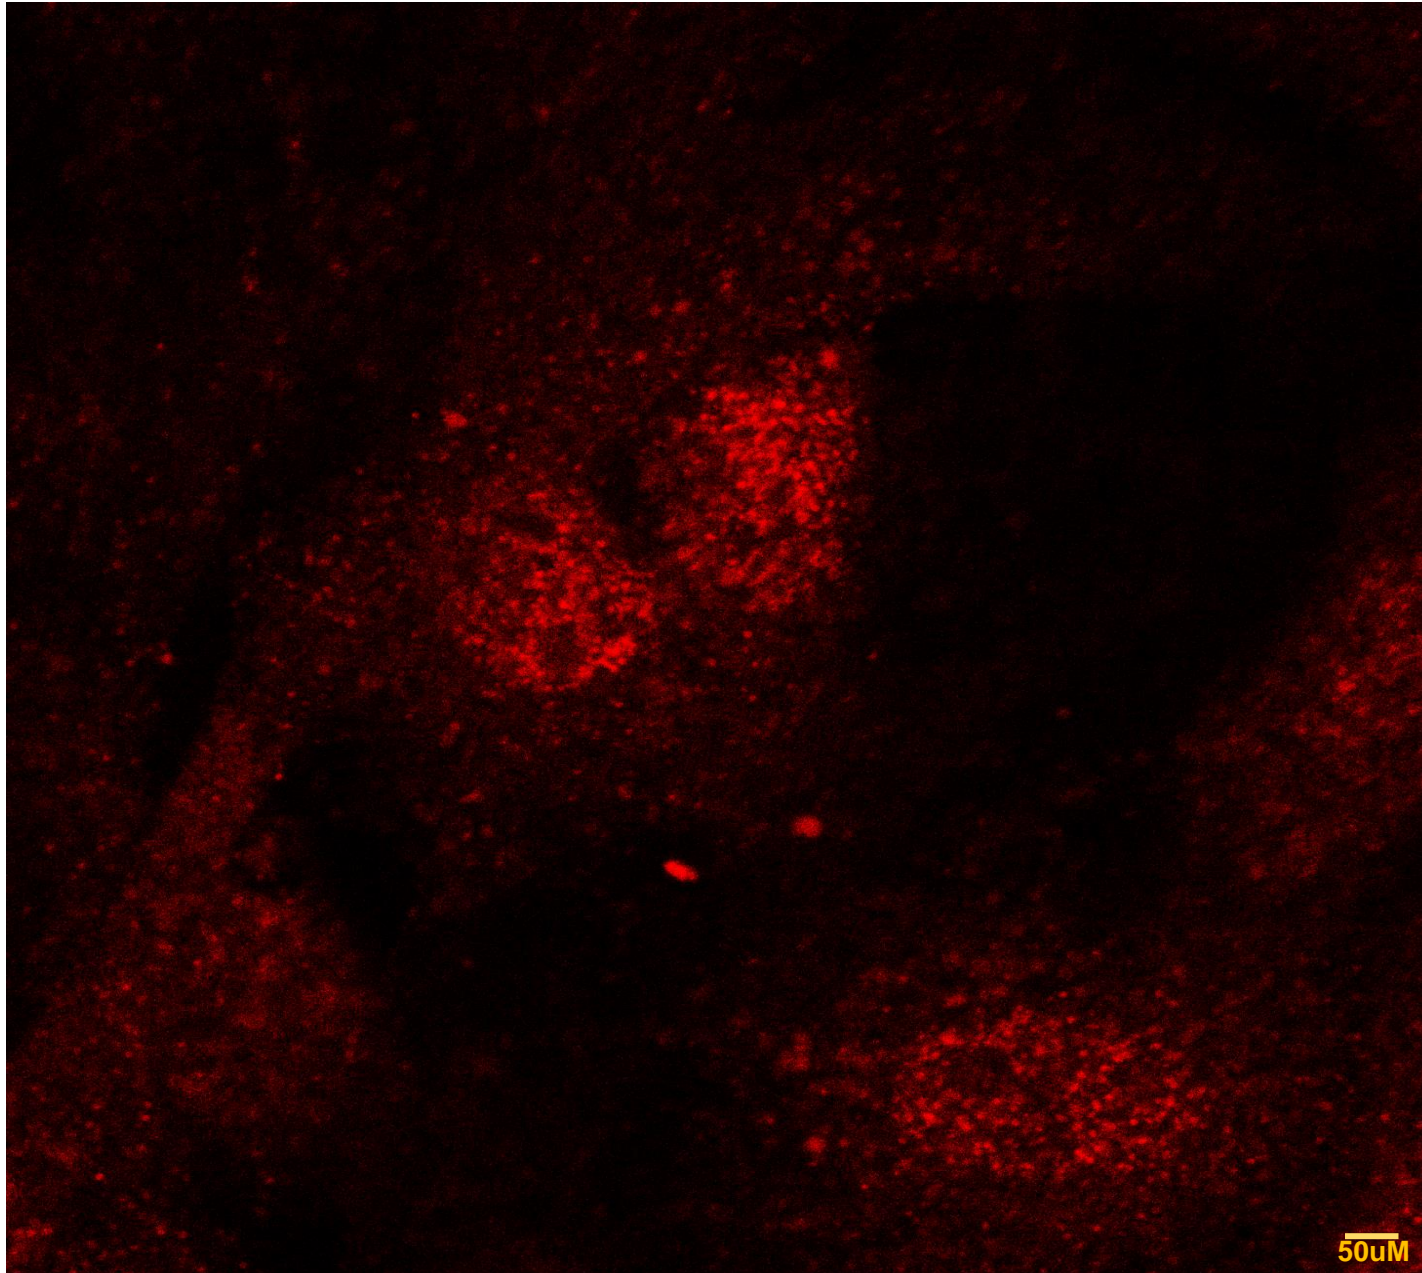

AM (HG, noGlut)

GSK3 $\beta$

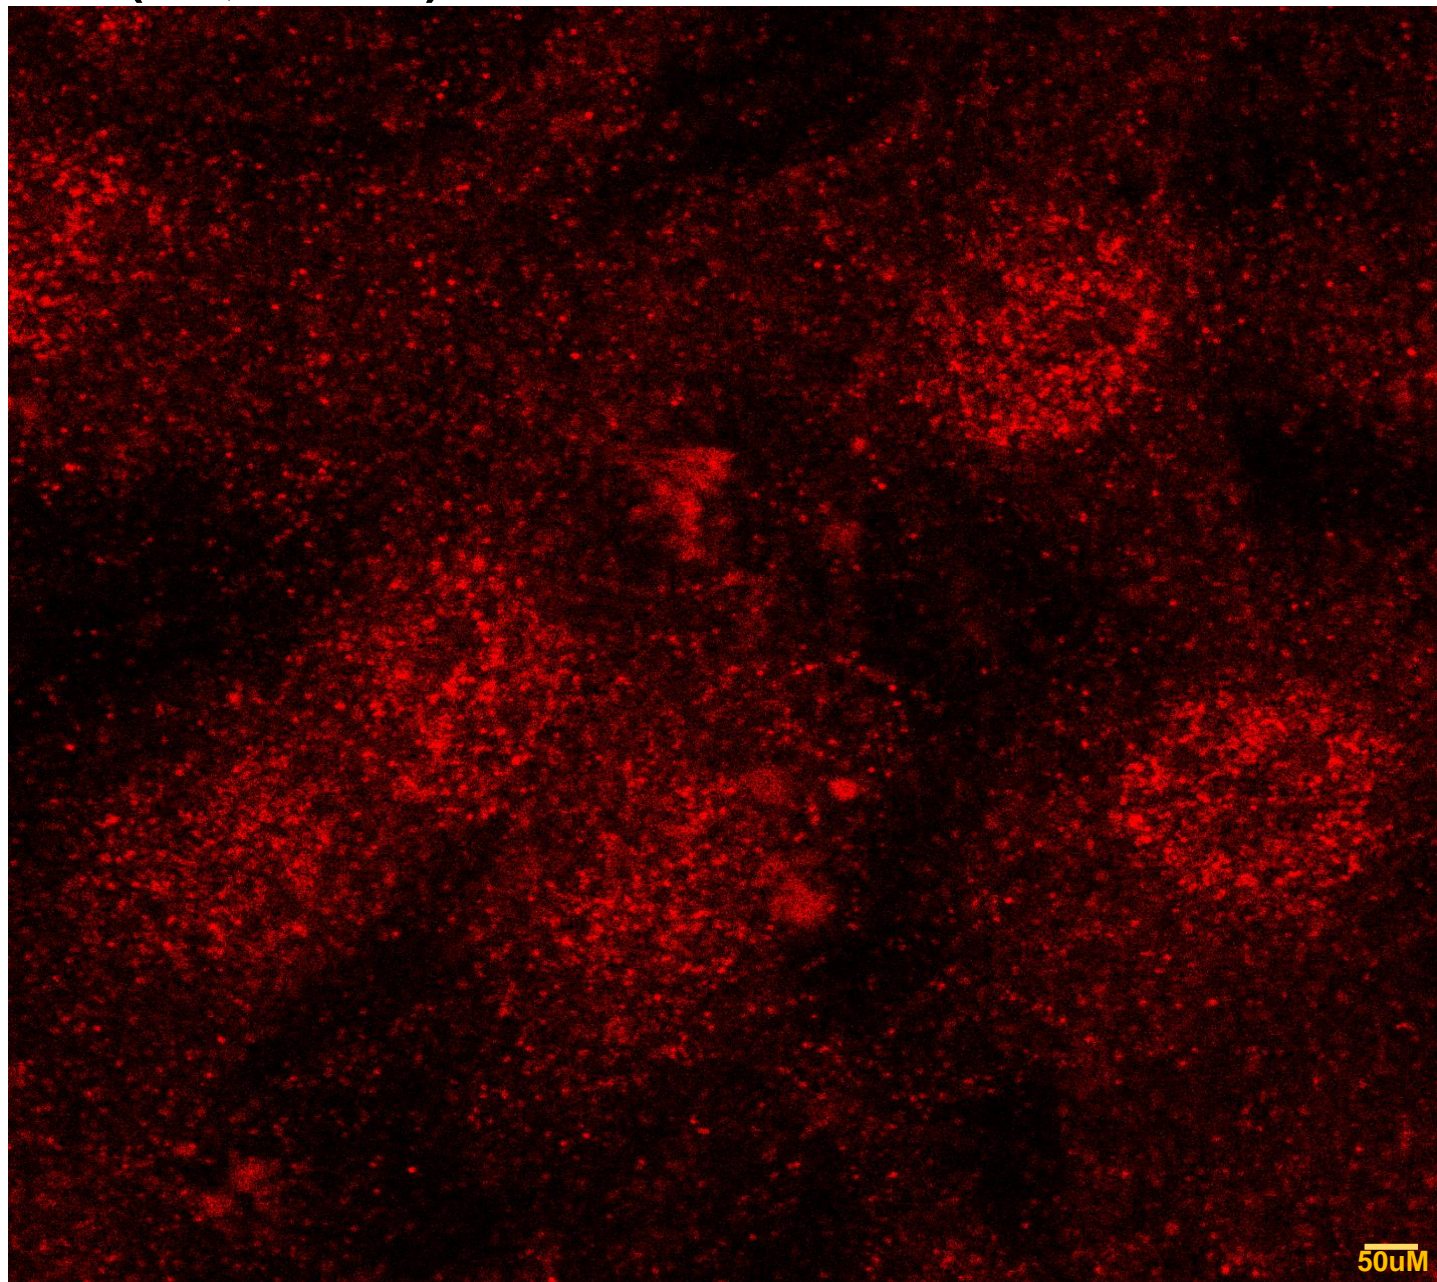

AM (LG, HGlut)

GSK3 $\beta$

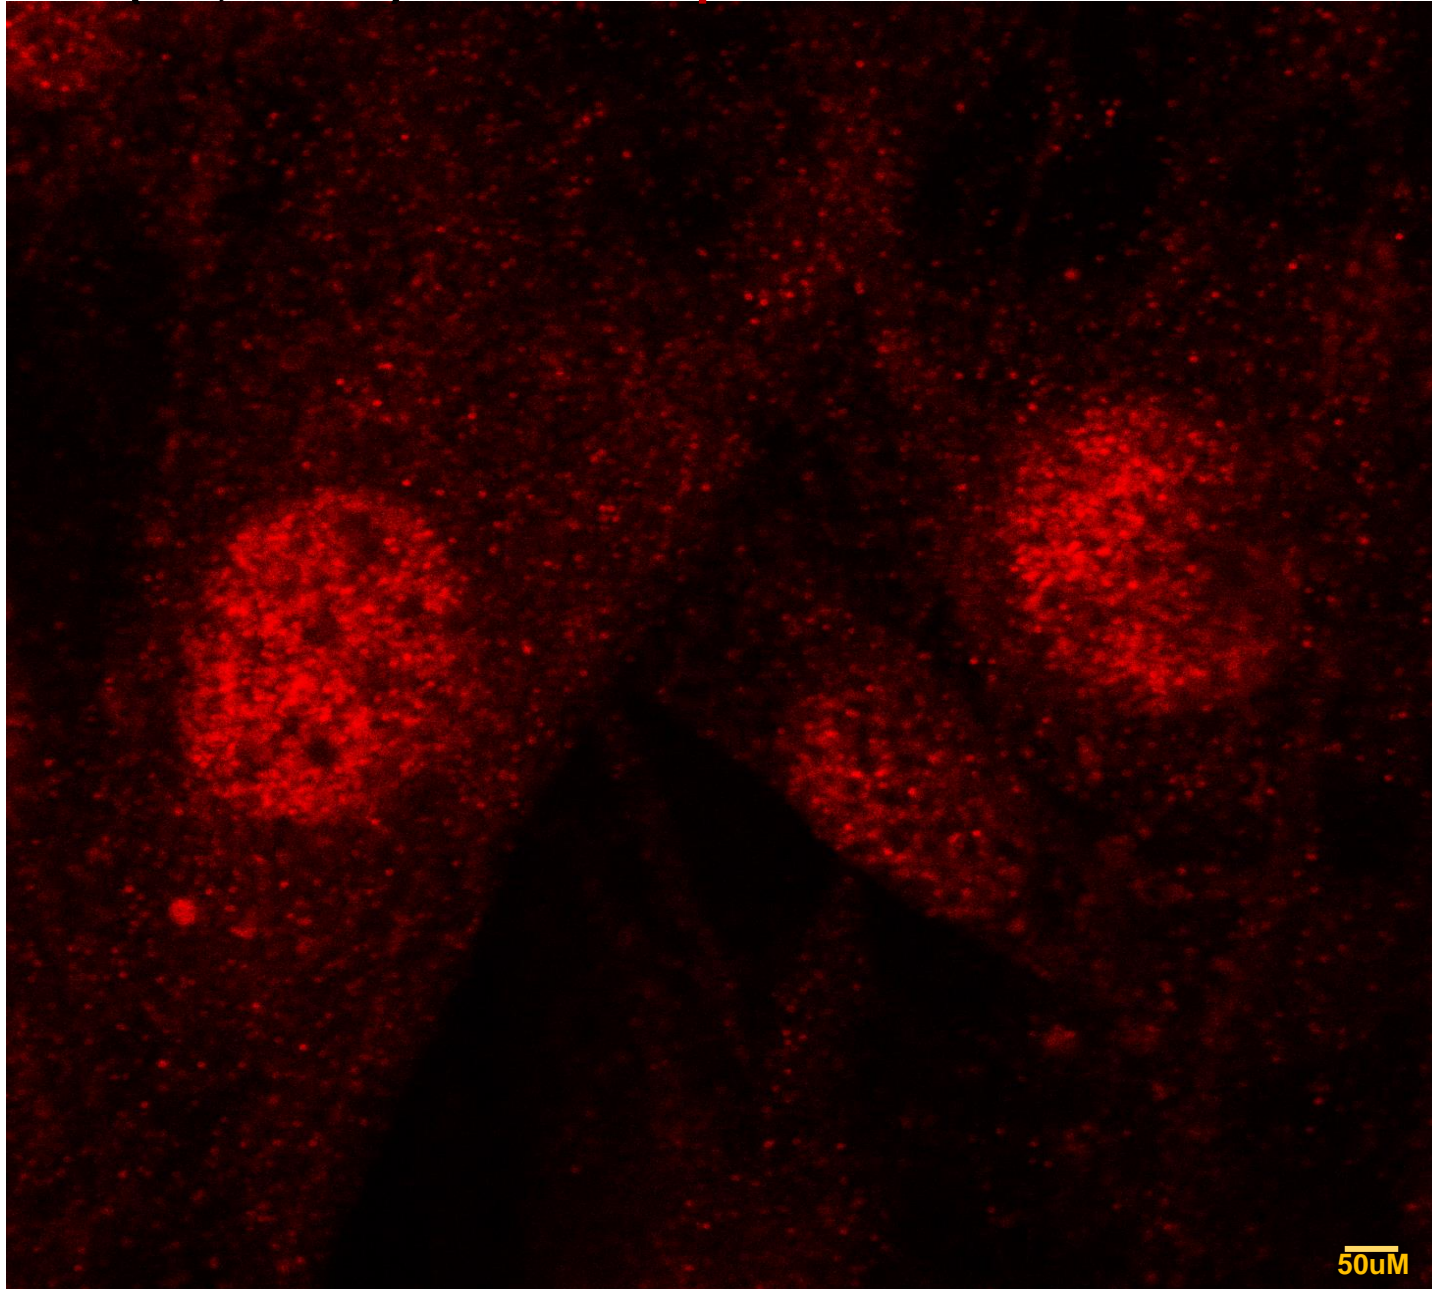

50 $\mu$ m



AM

MERGED

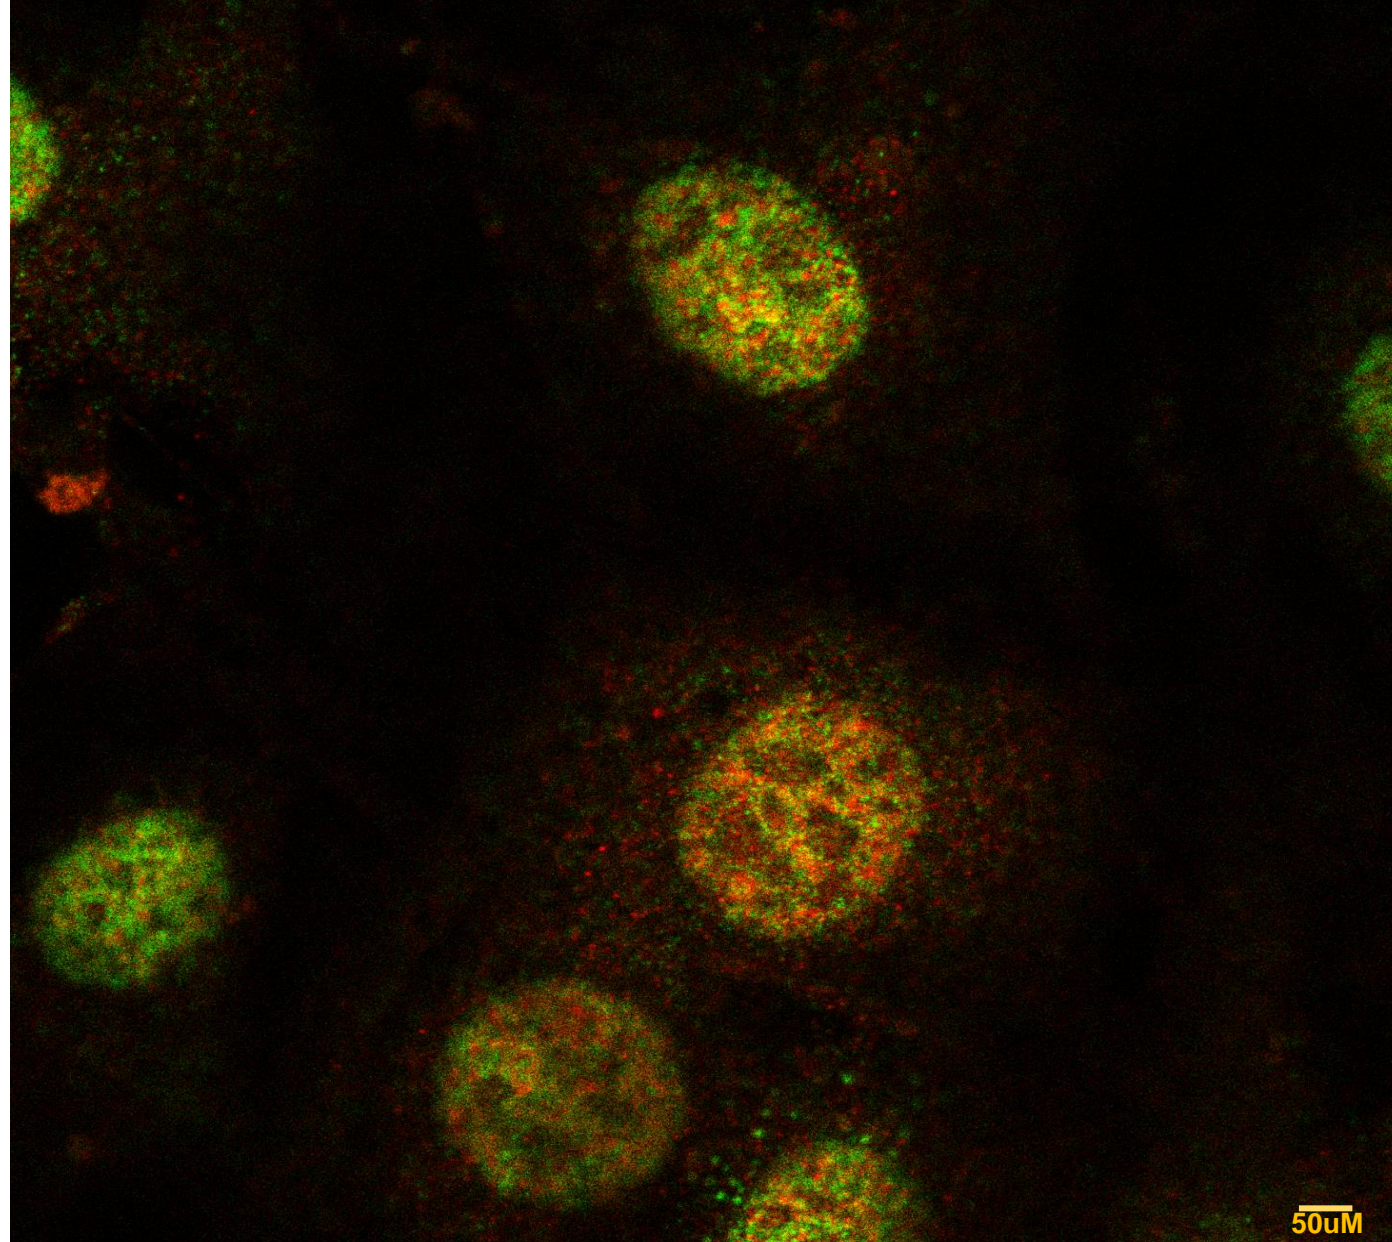

AM (HG)

MERGED

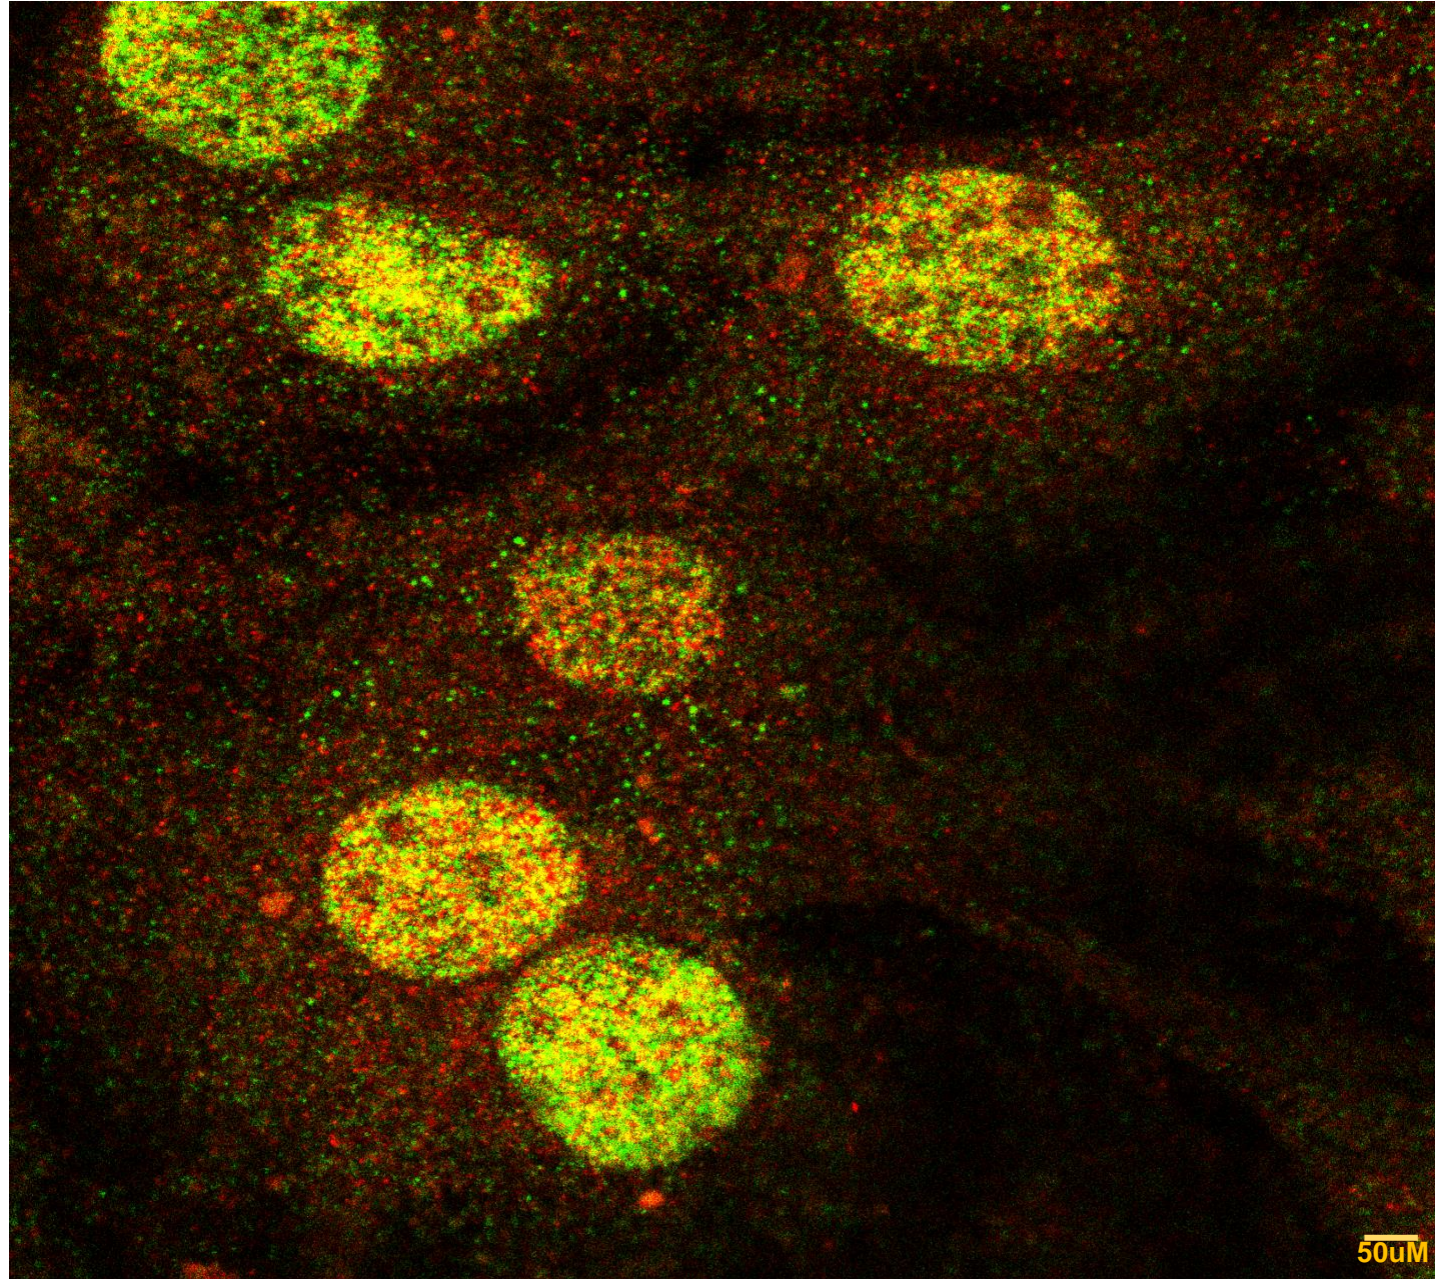

AM (LG)

MERGED

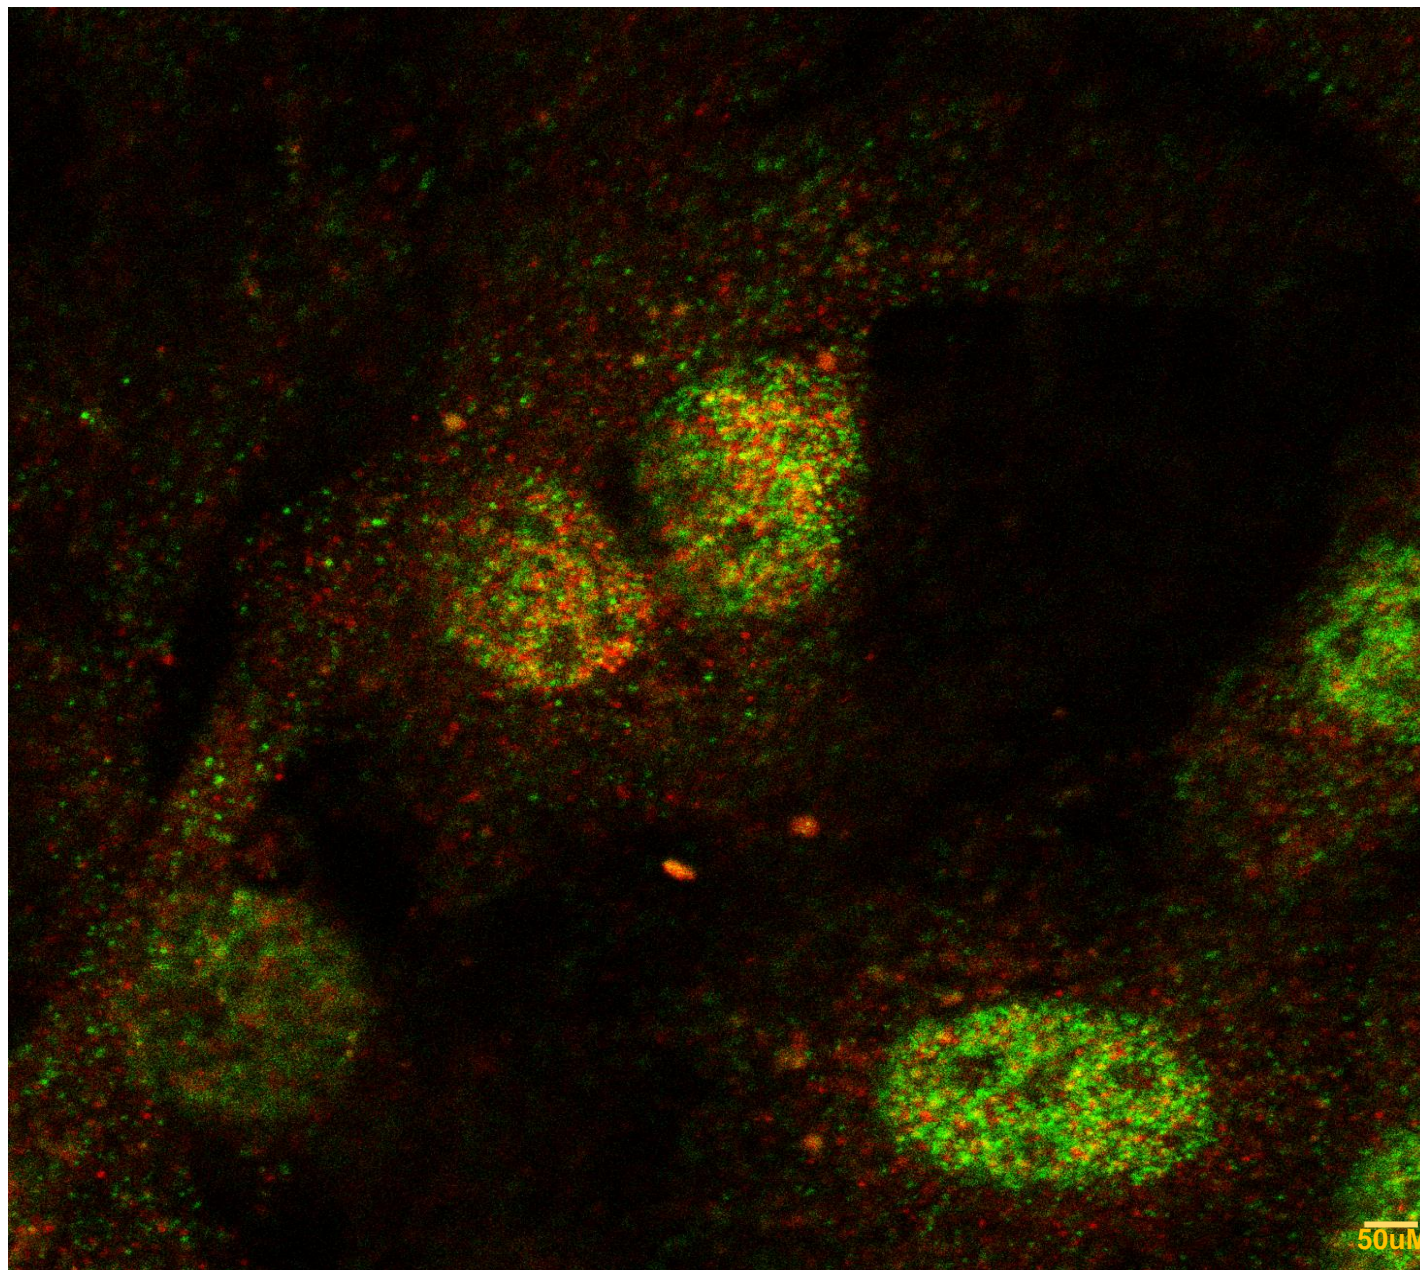

AM (HG, noGlut) **MERGED**

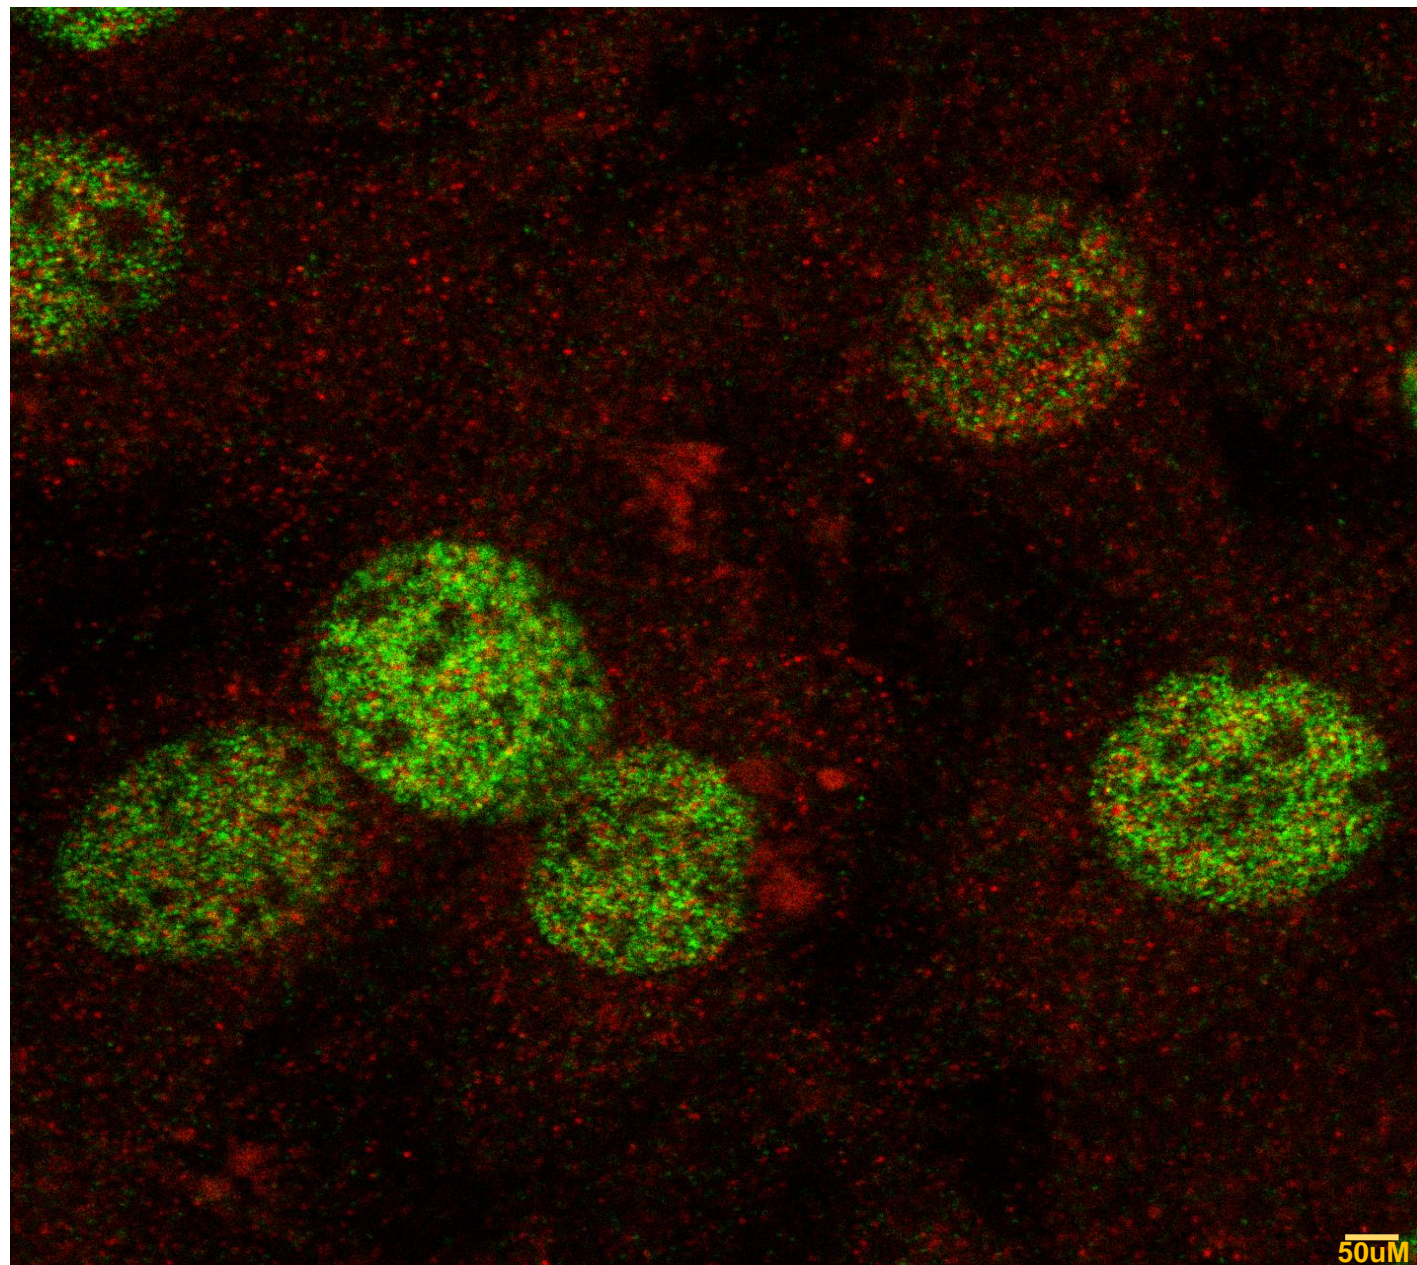

AM (LG, HGlut) **MERGED**

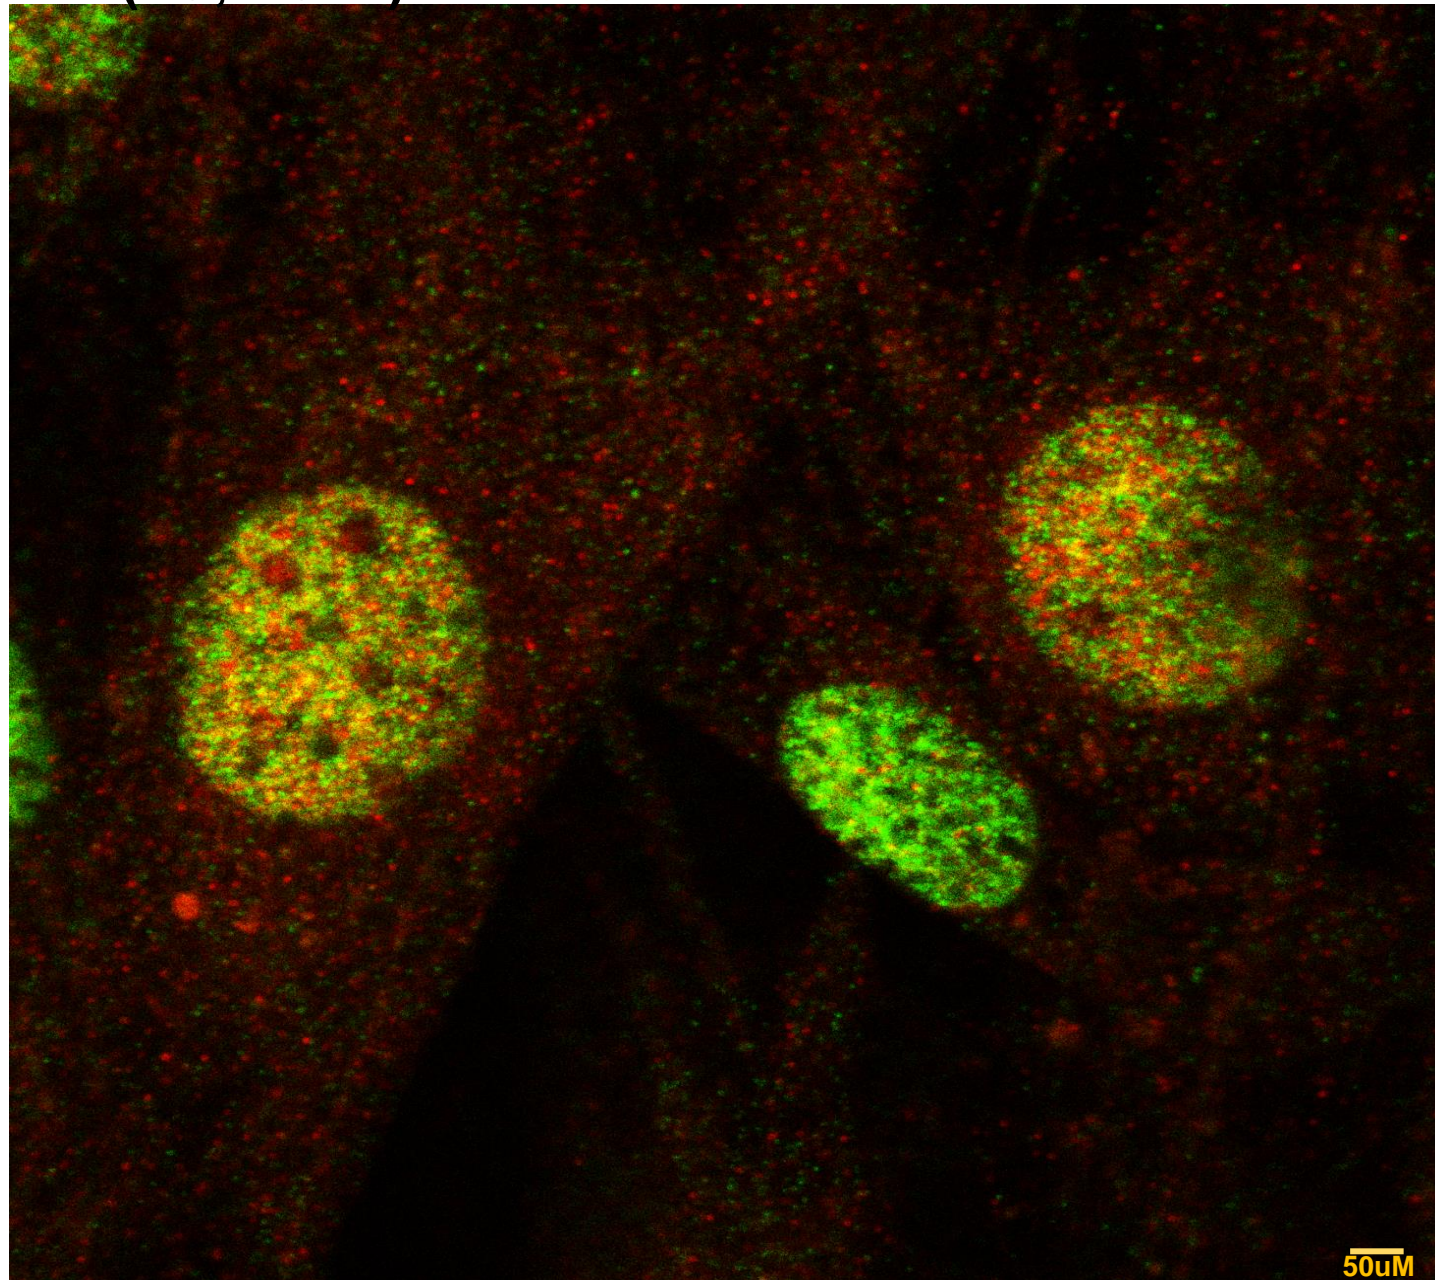

AM

MERGED + DAPI

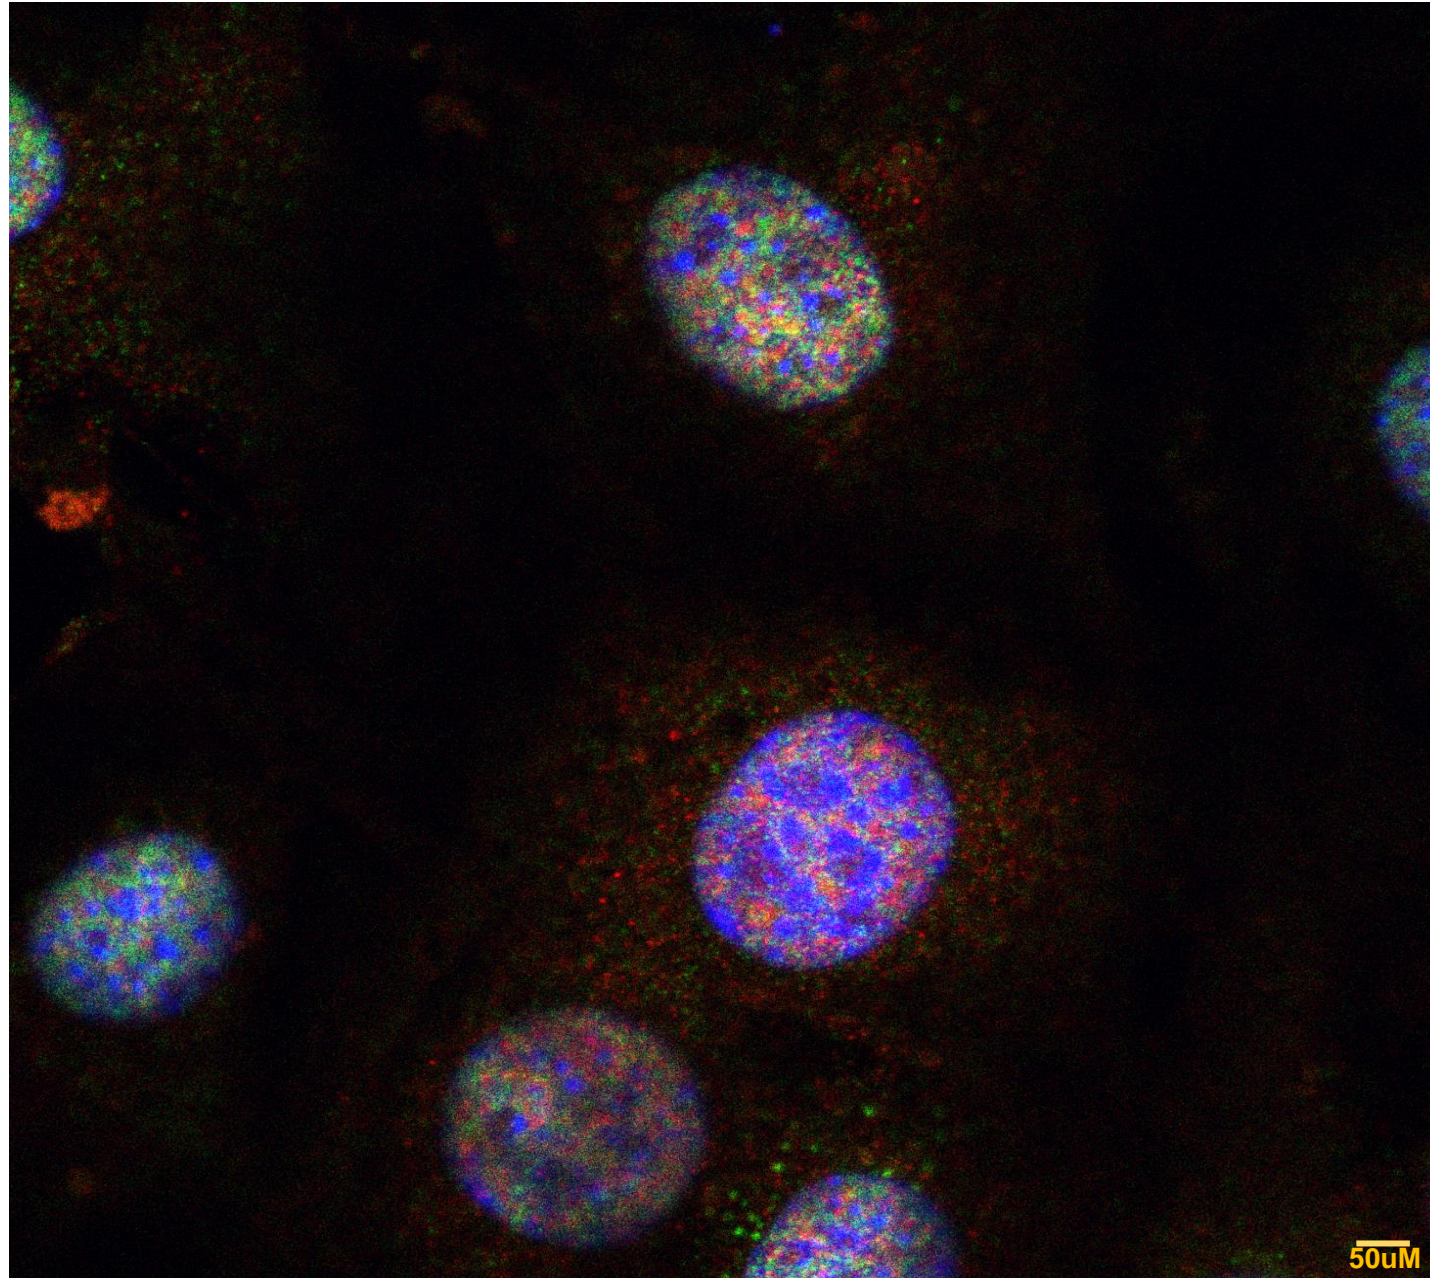

AM (HG)

MERGED + DAPI

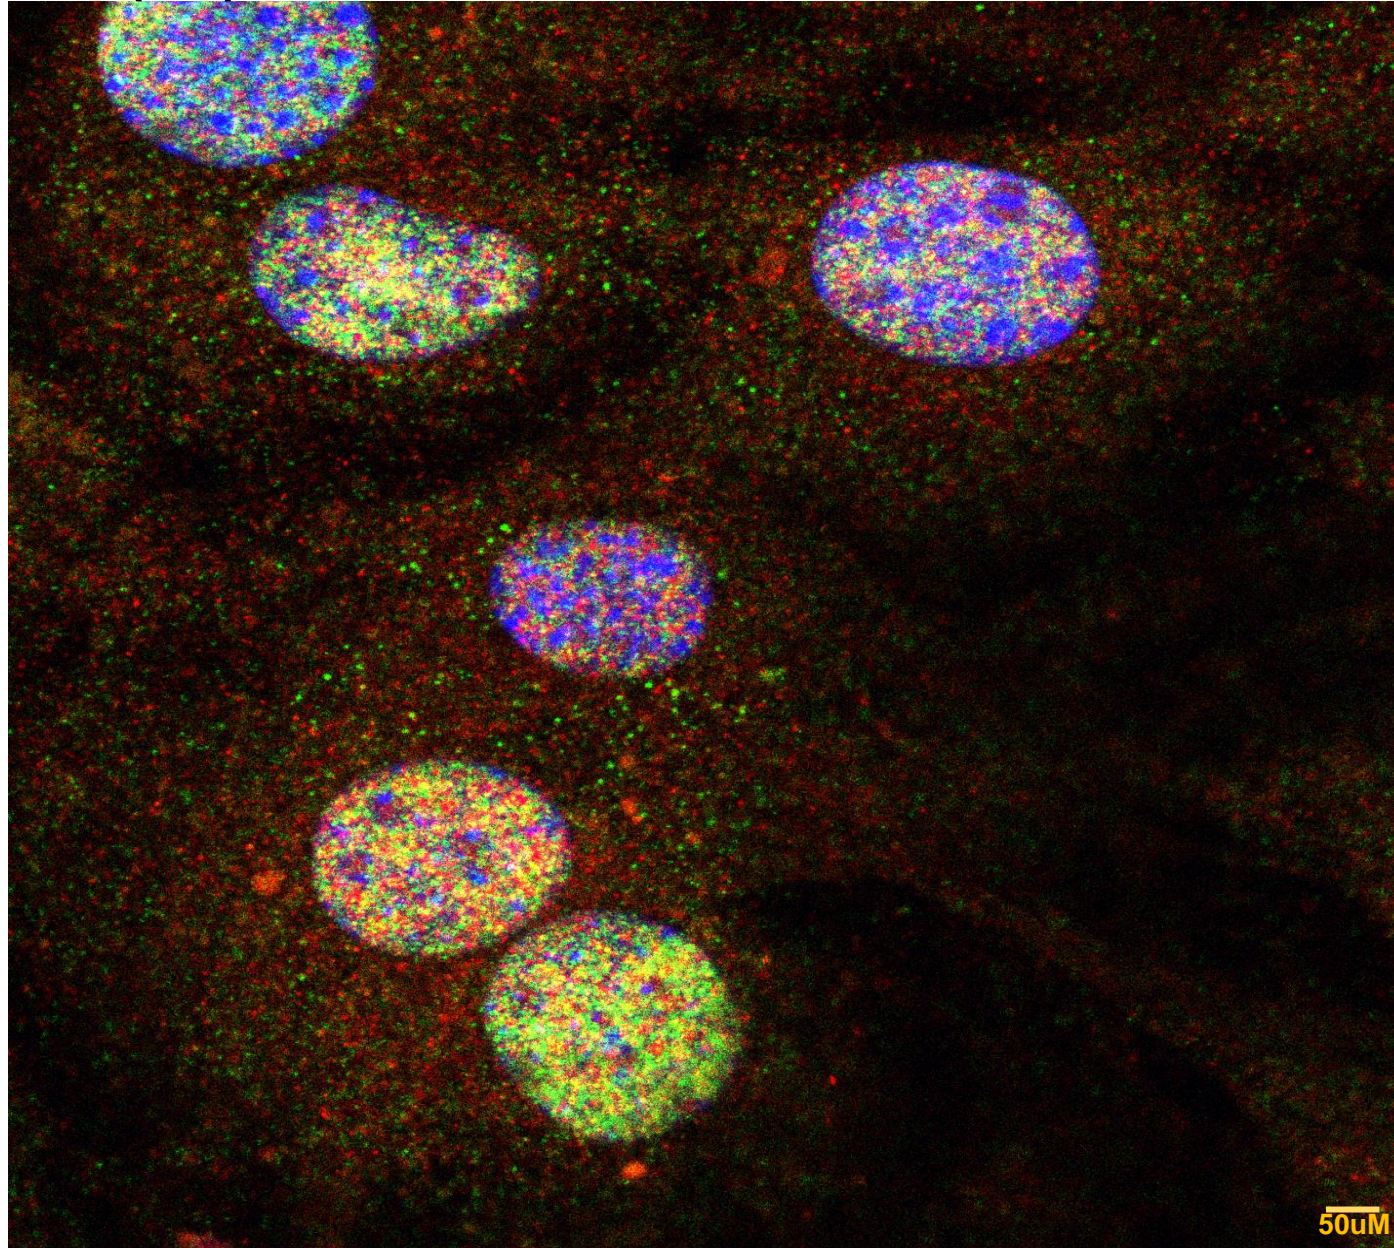

**AM (LG)**

**MERGED + DAPI**

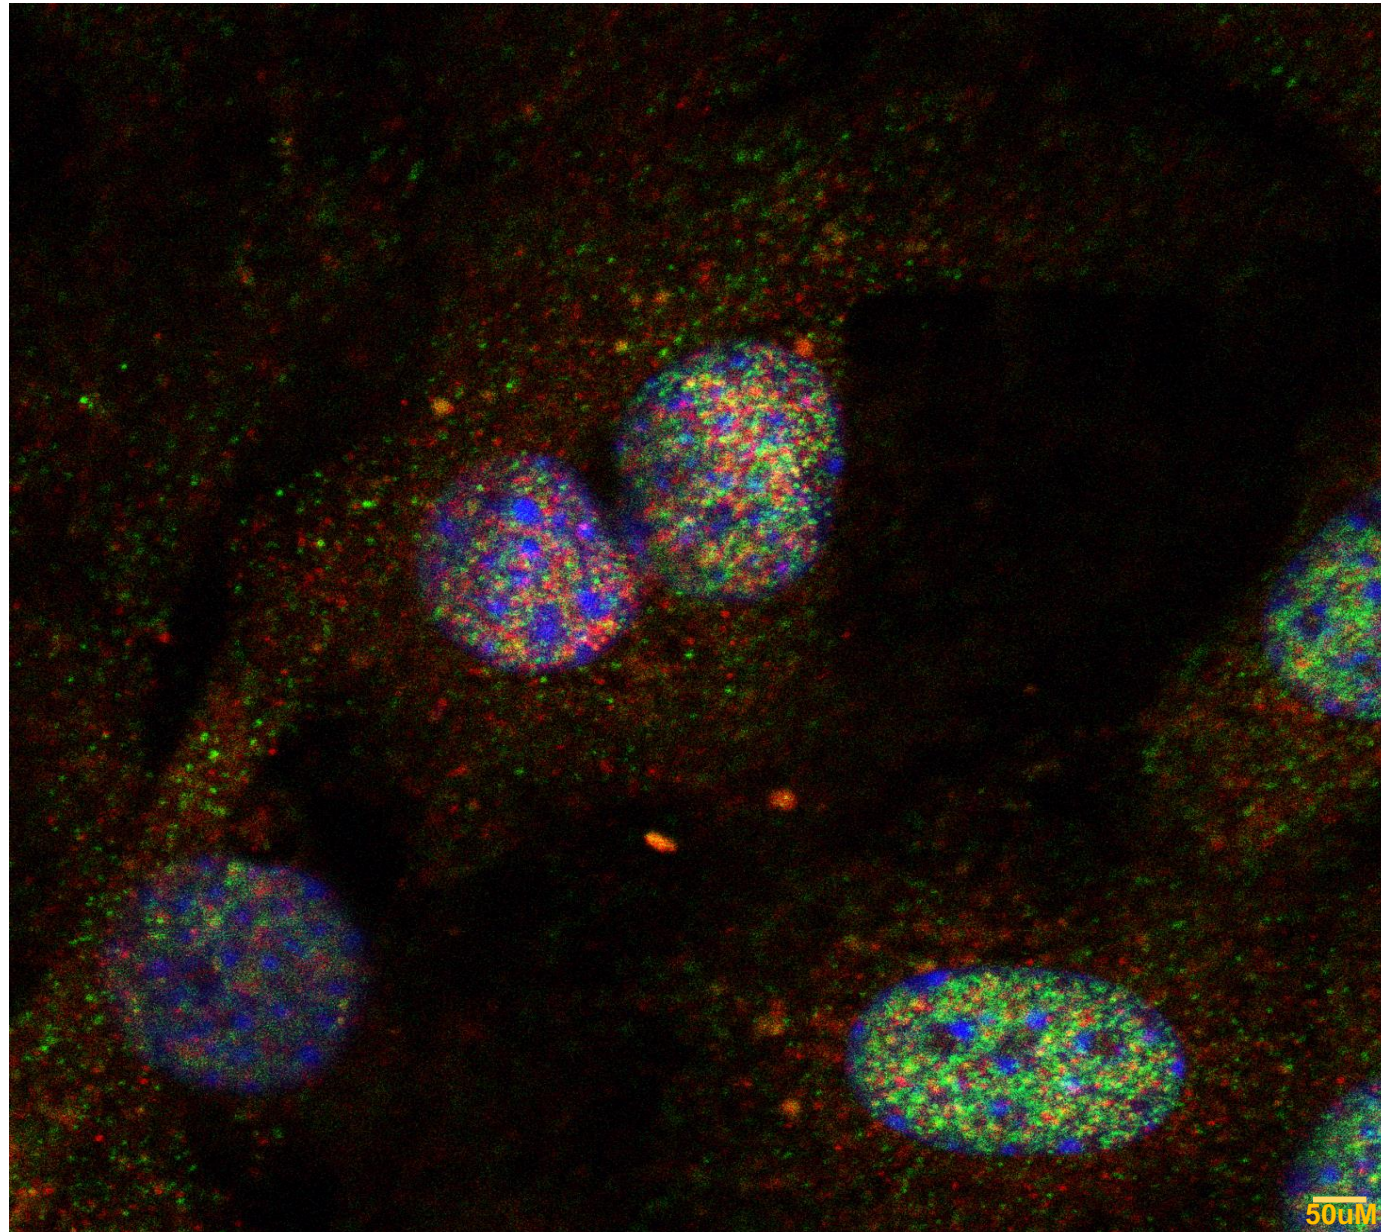



AM (HG, noGlut)

MERGED + DAPI

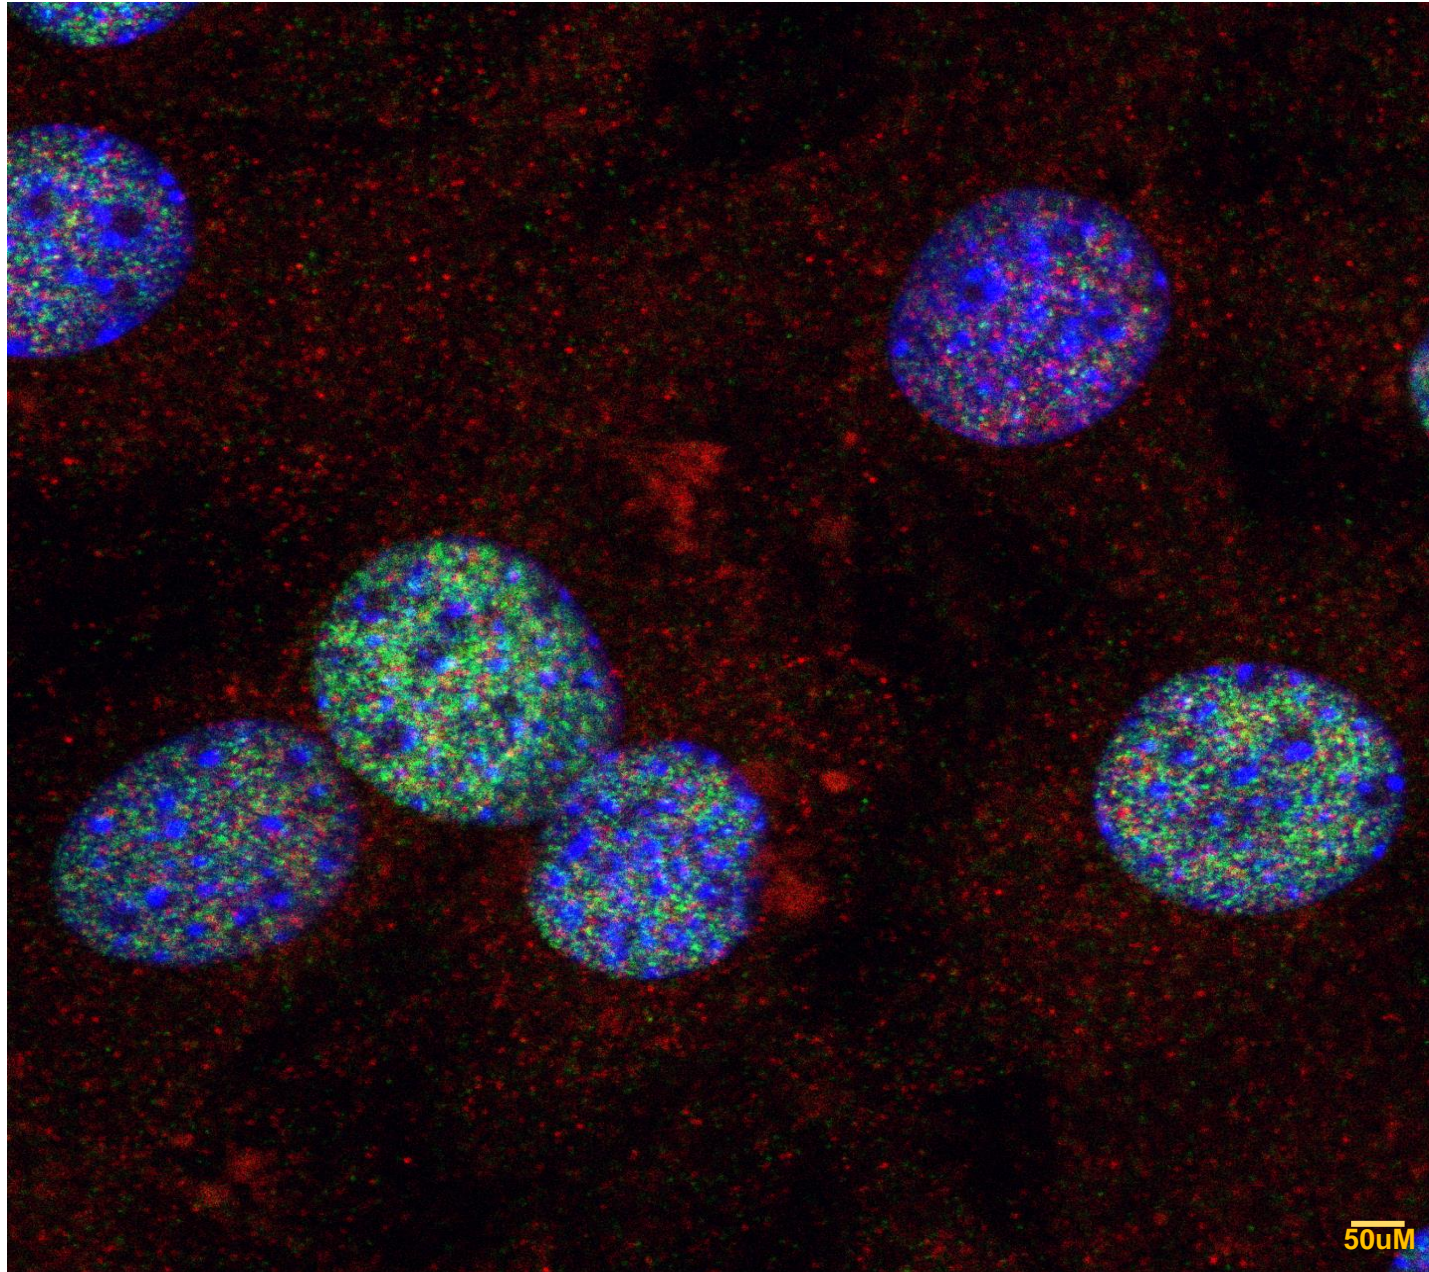

AM (LG, HGIut)

MERGED + DAPI

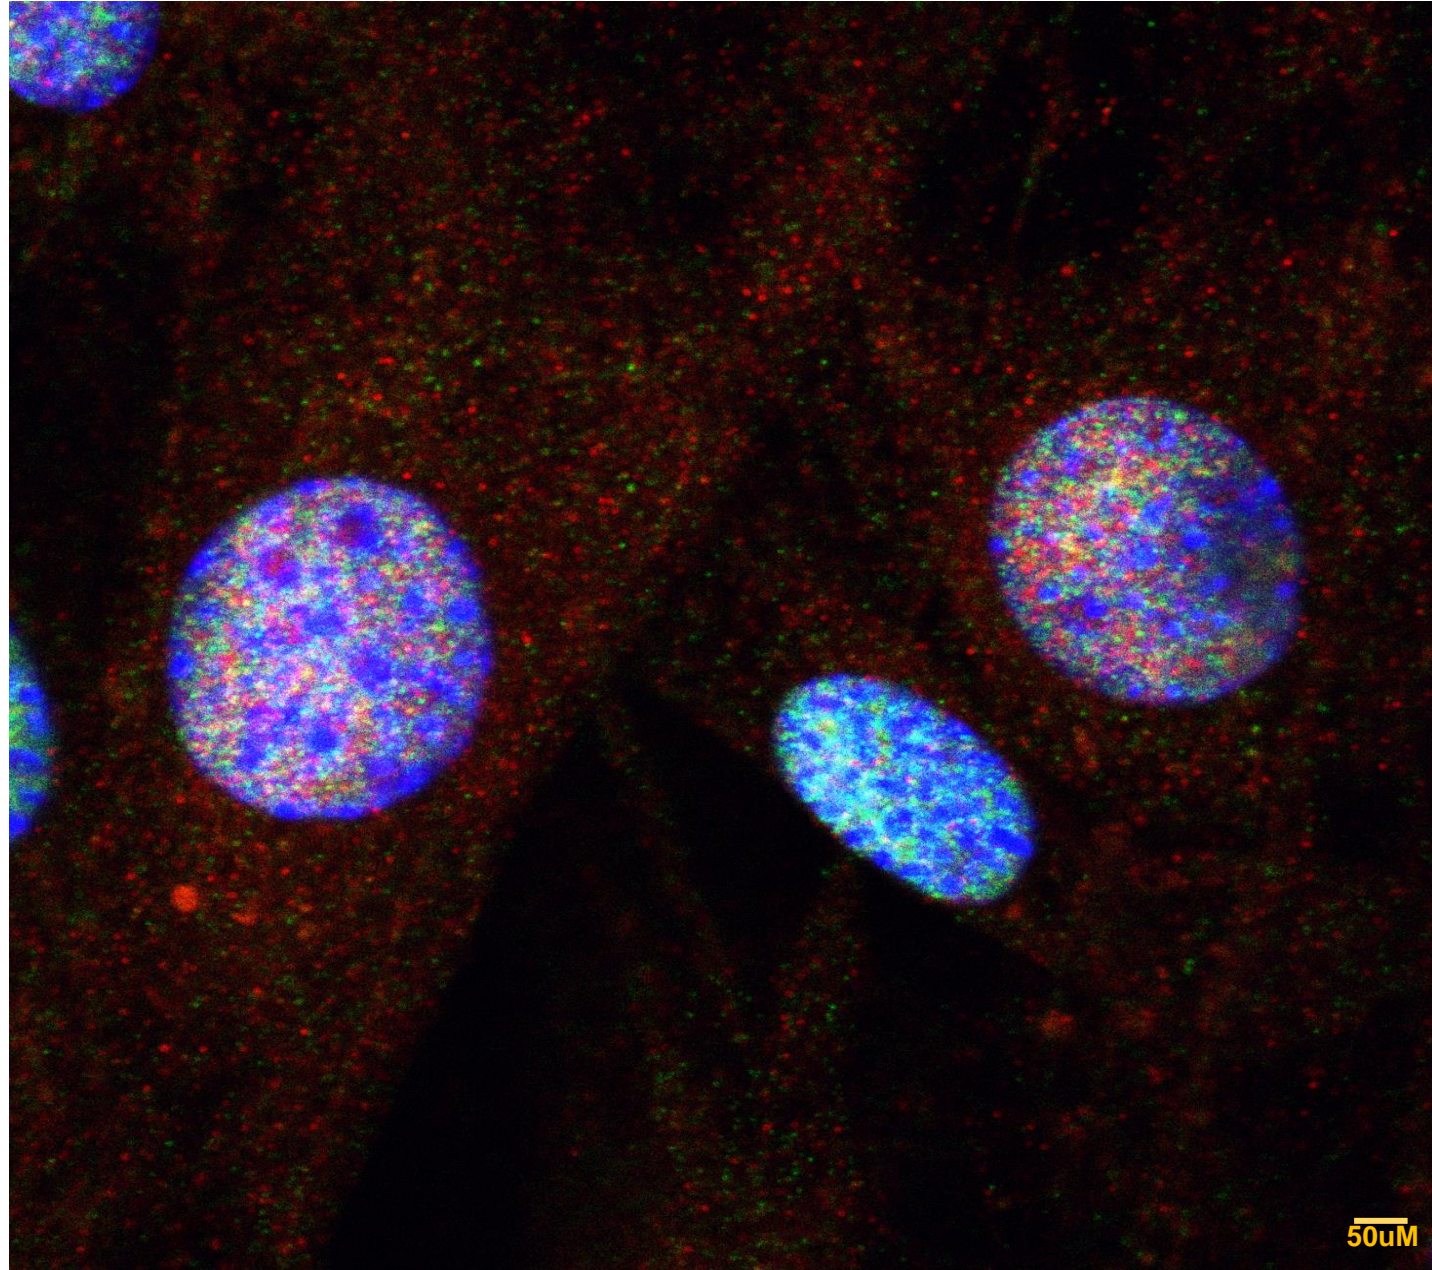

SF.2 B)

D-0 AM

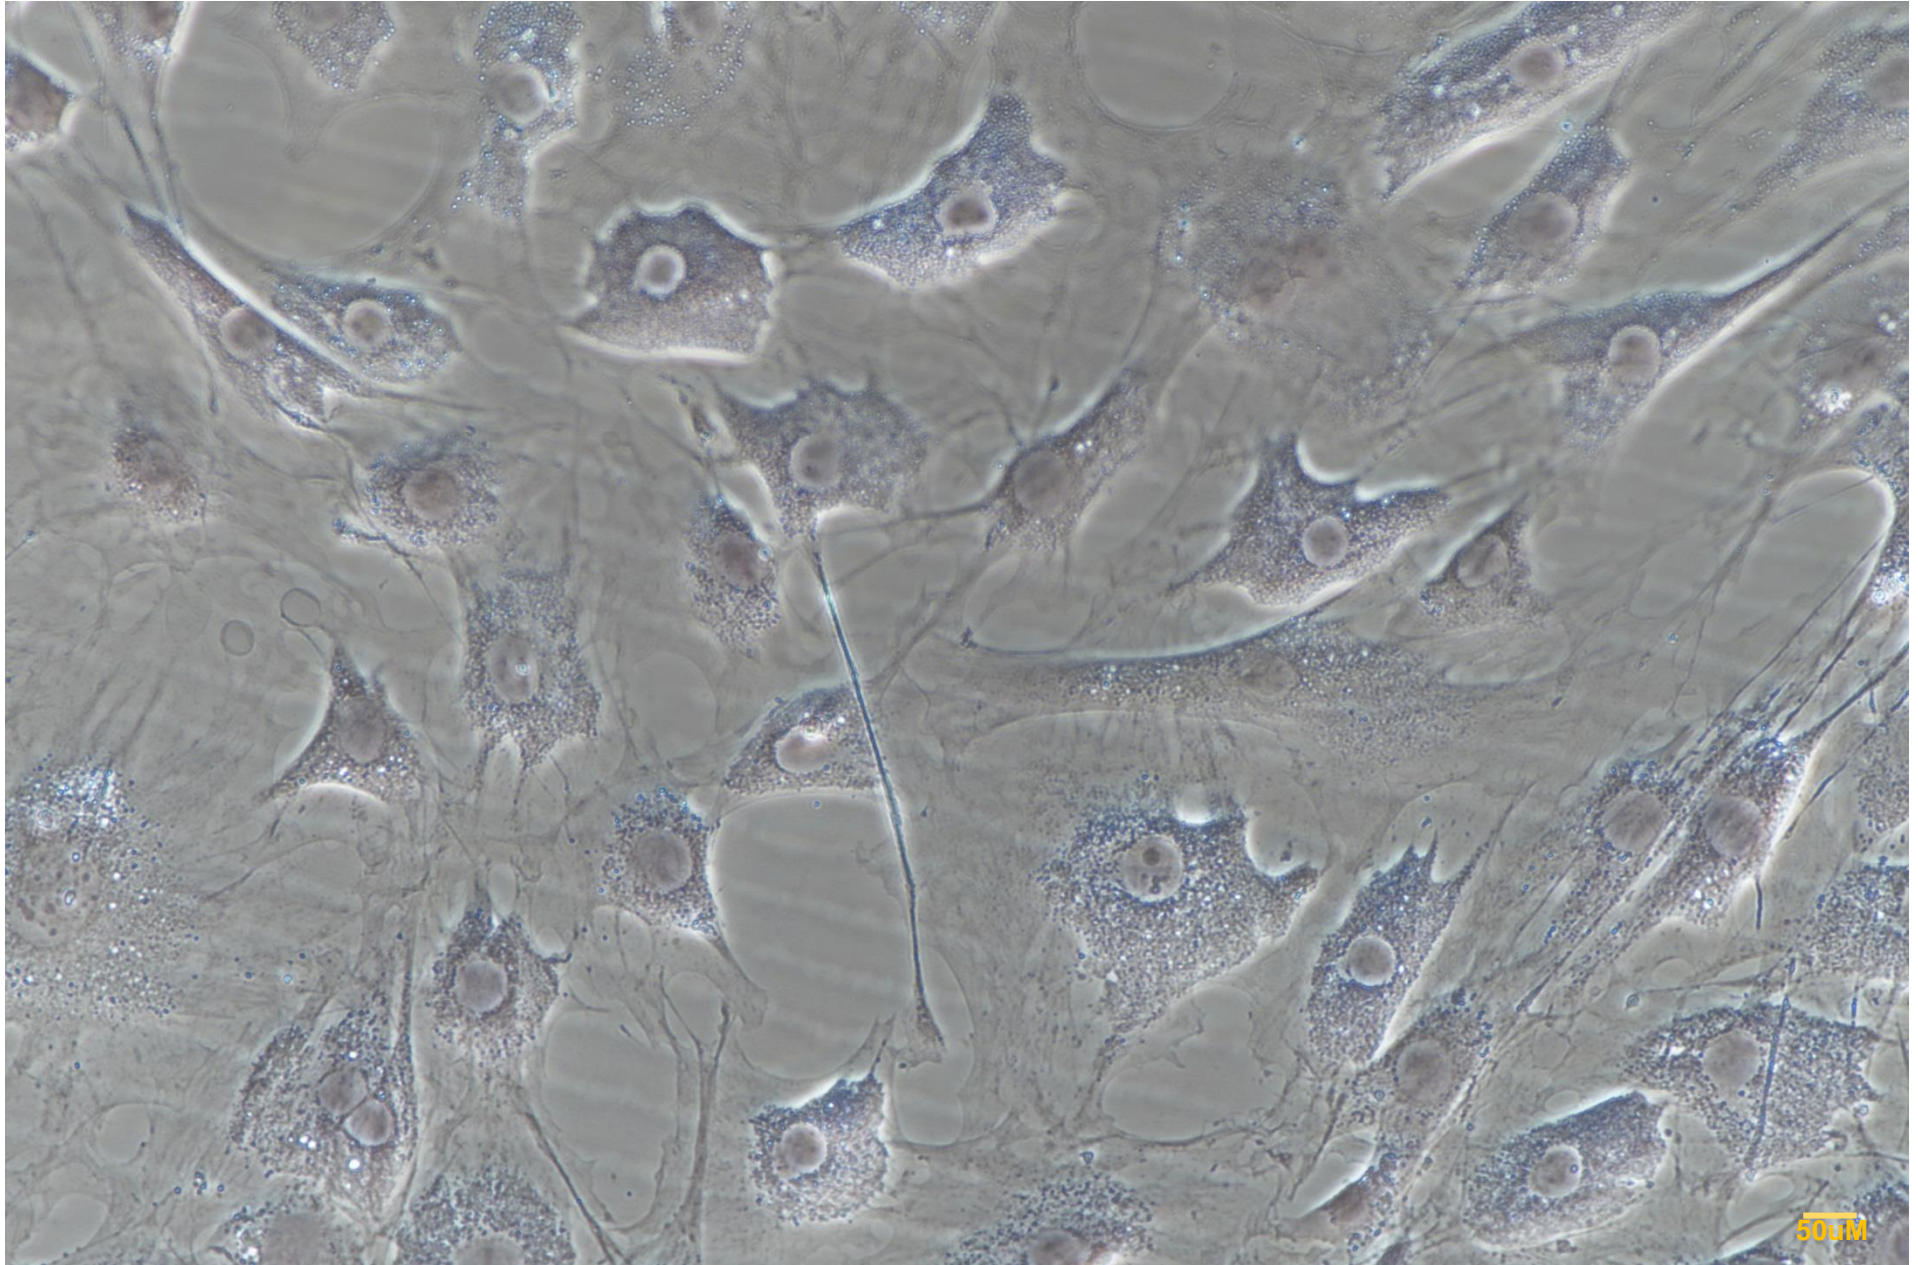

D-0 AM

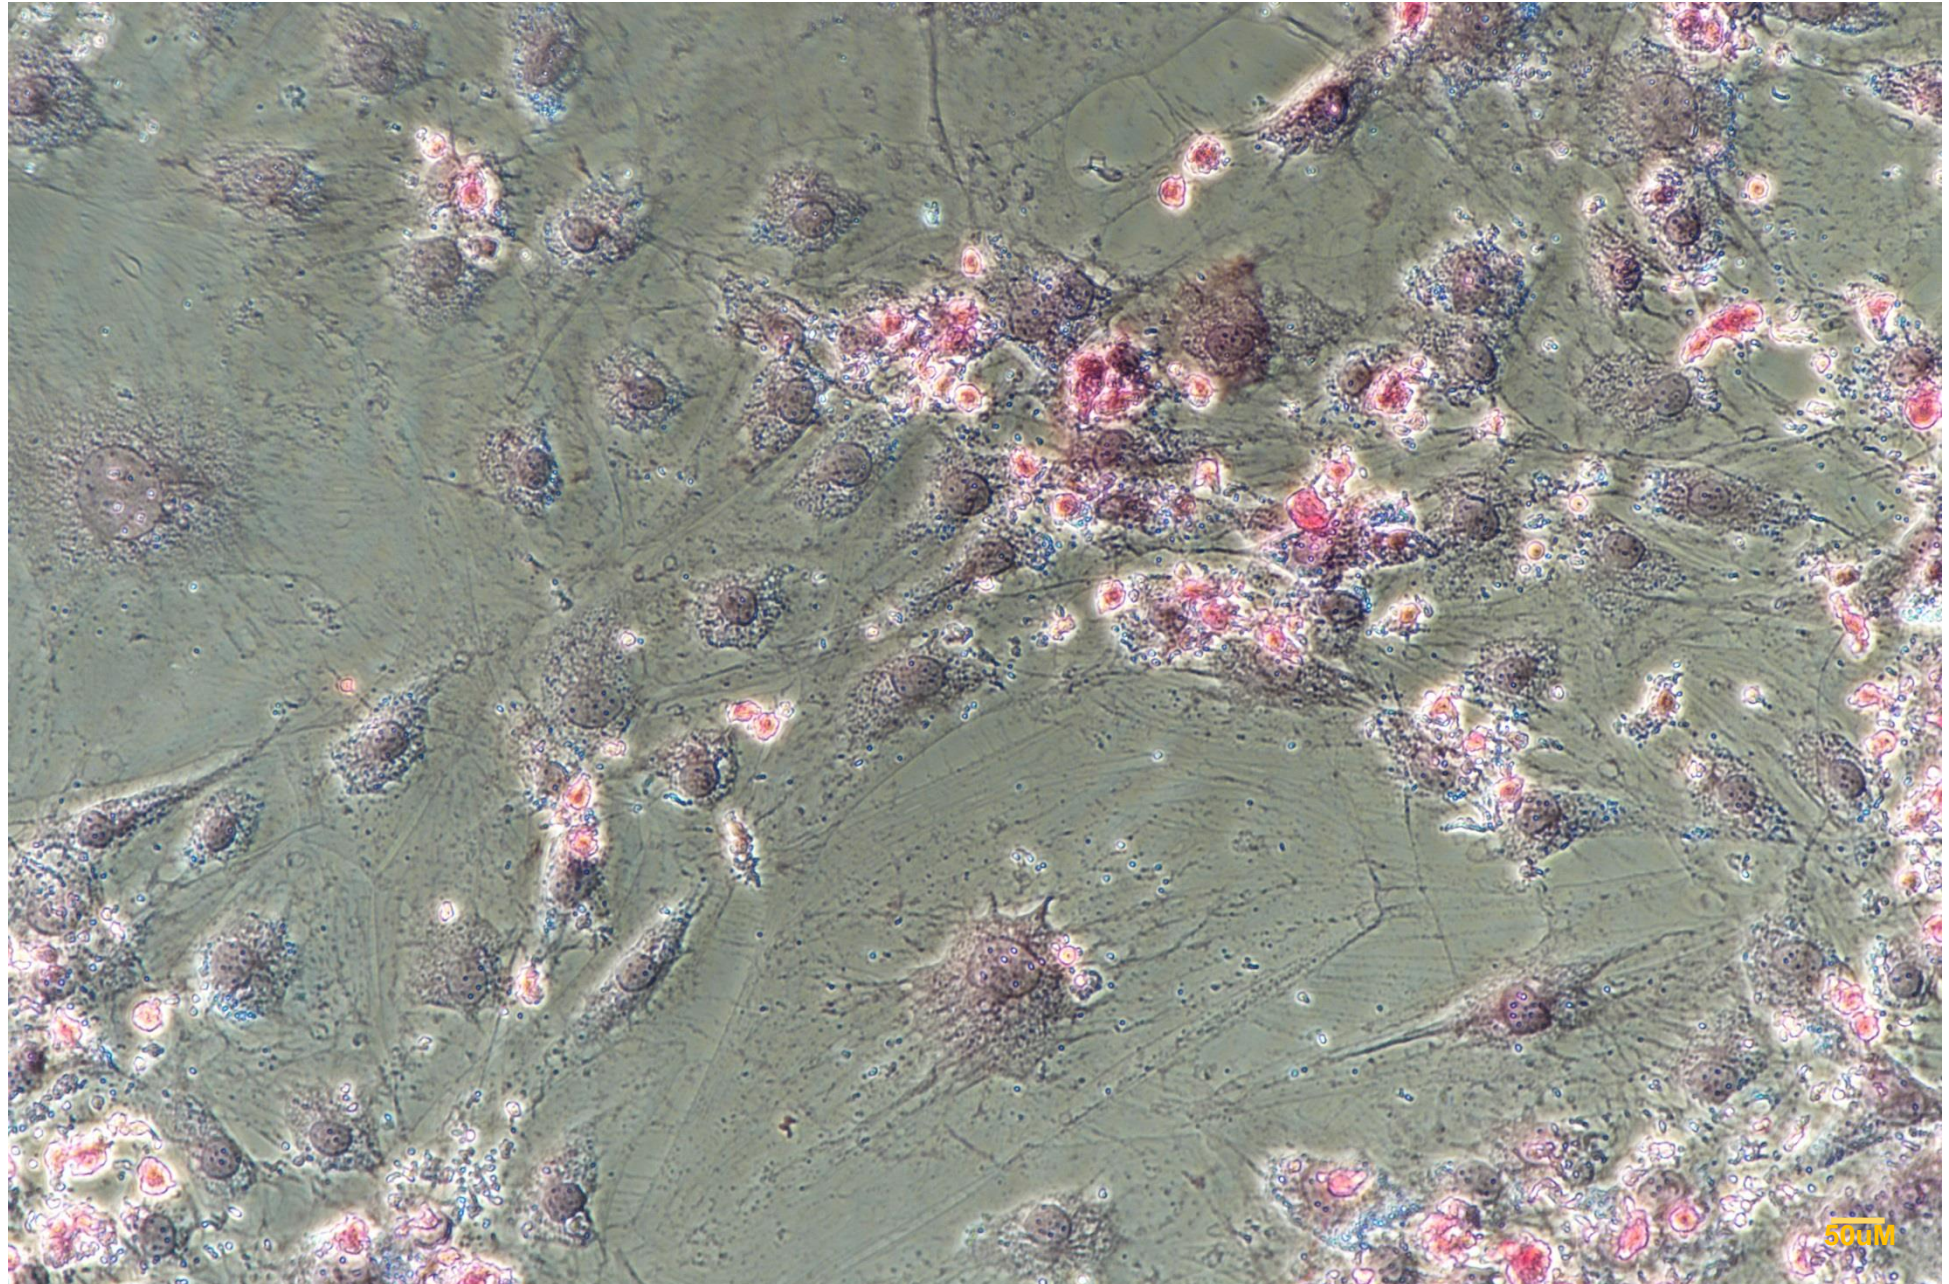

D-0 AM (HG)

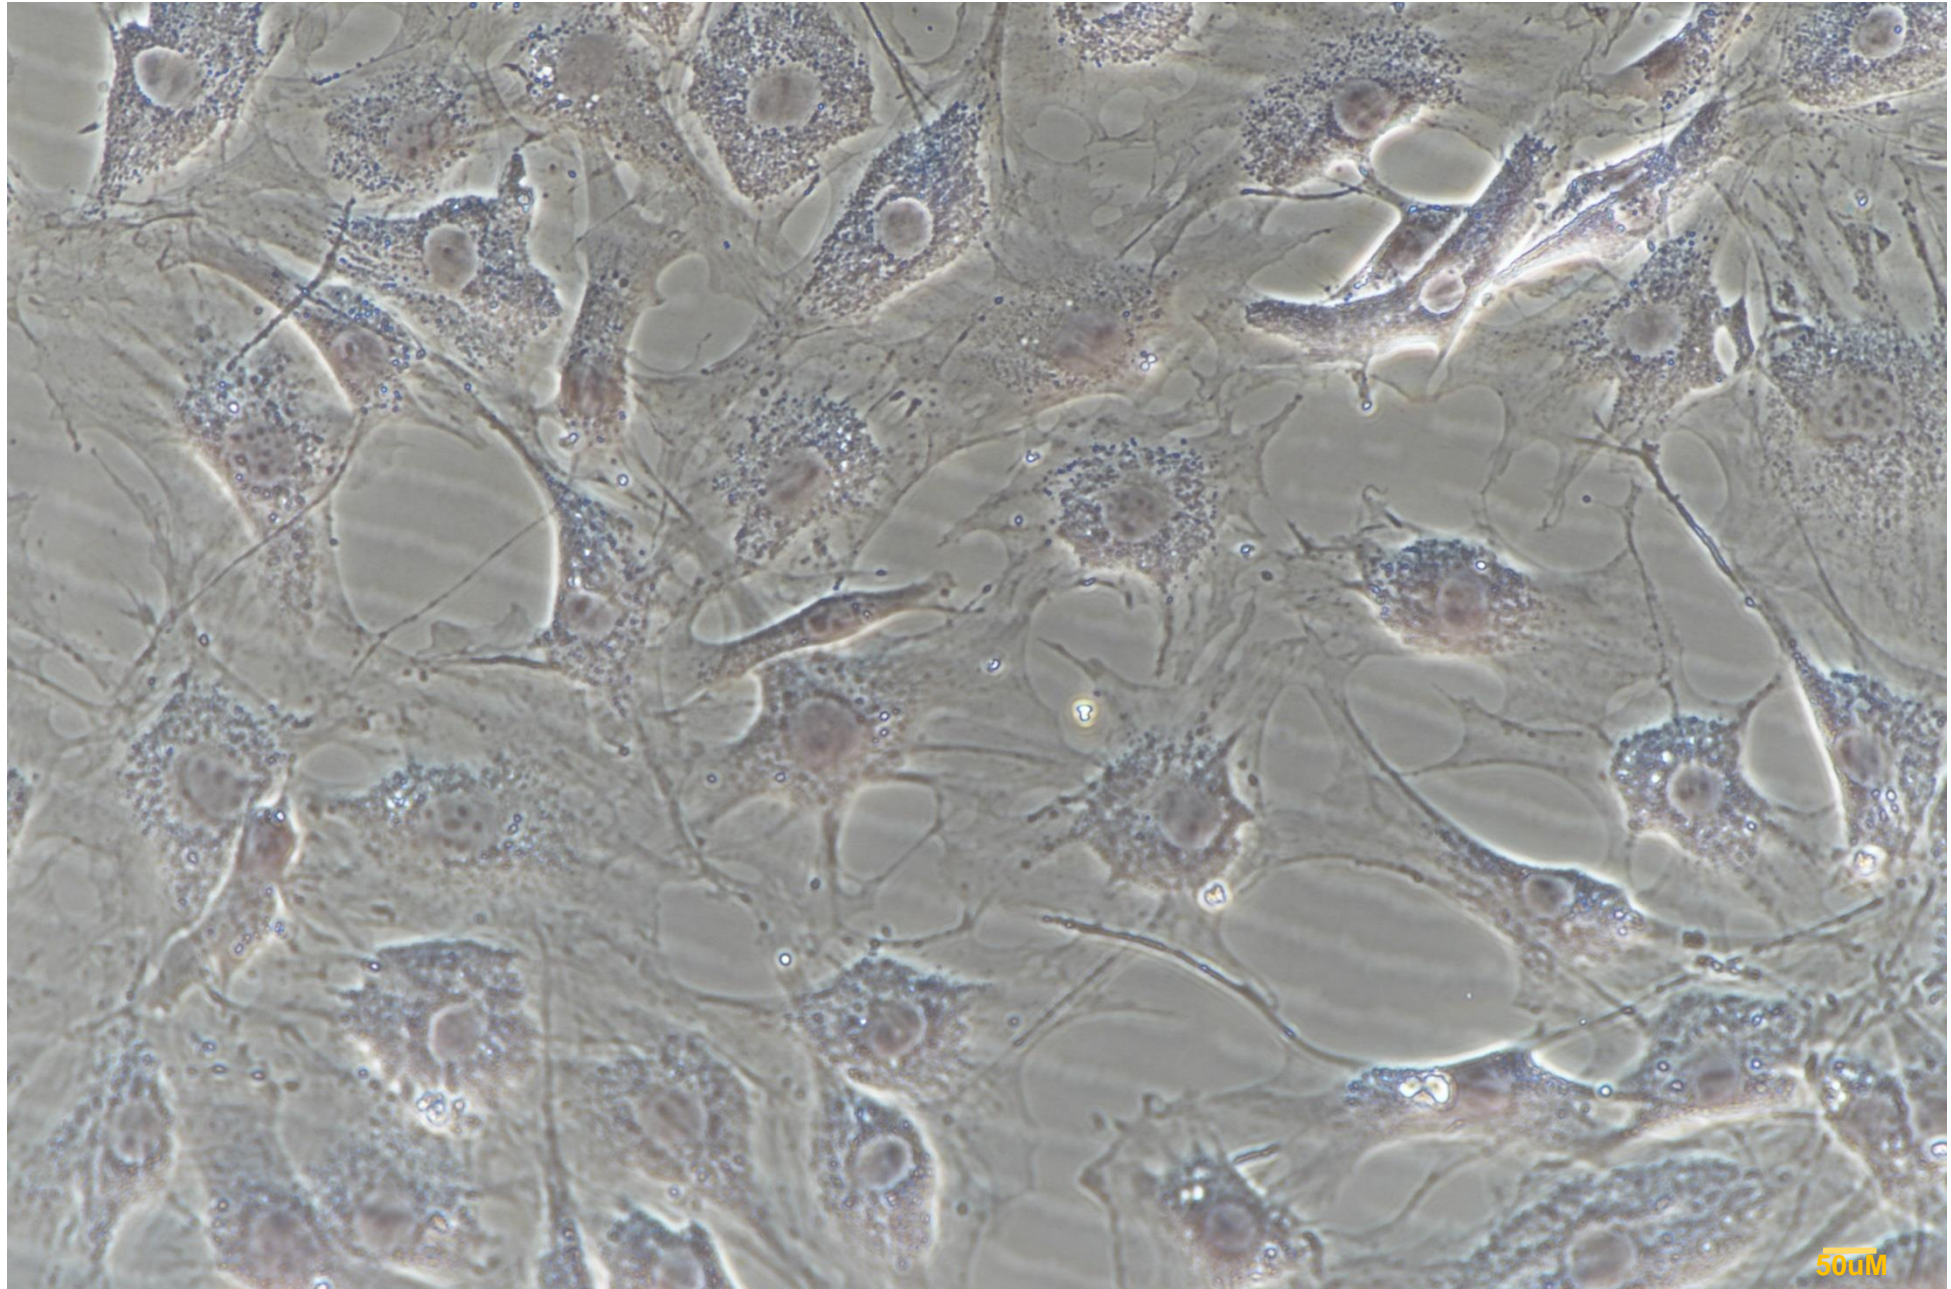

D-0 AM (HG)

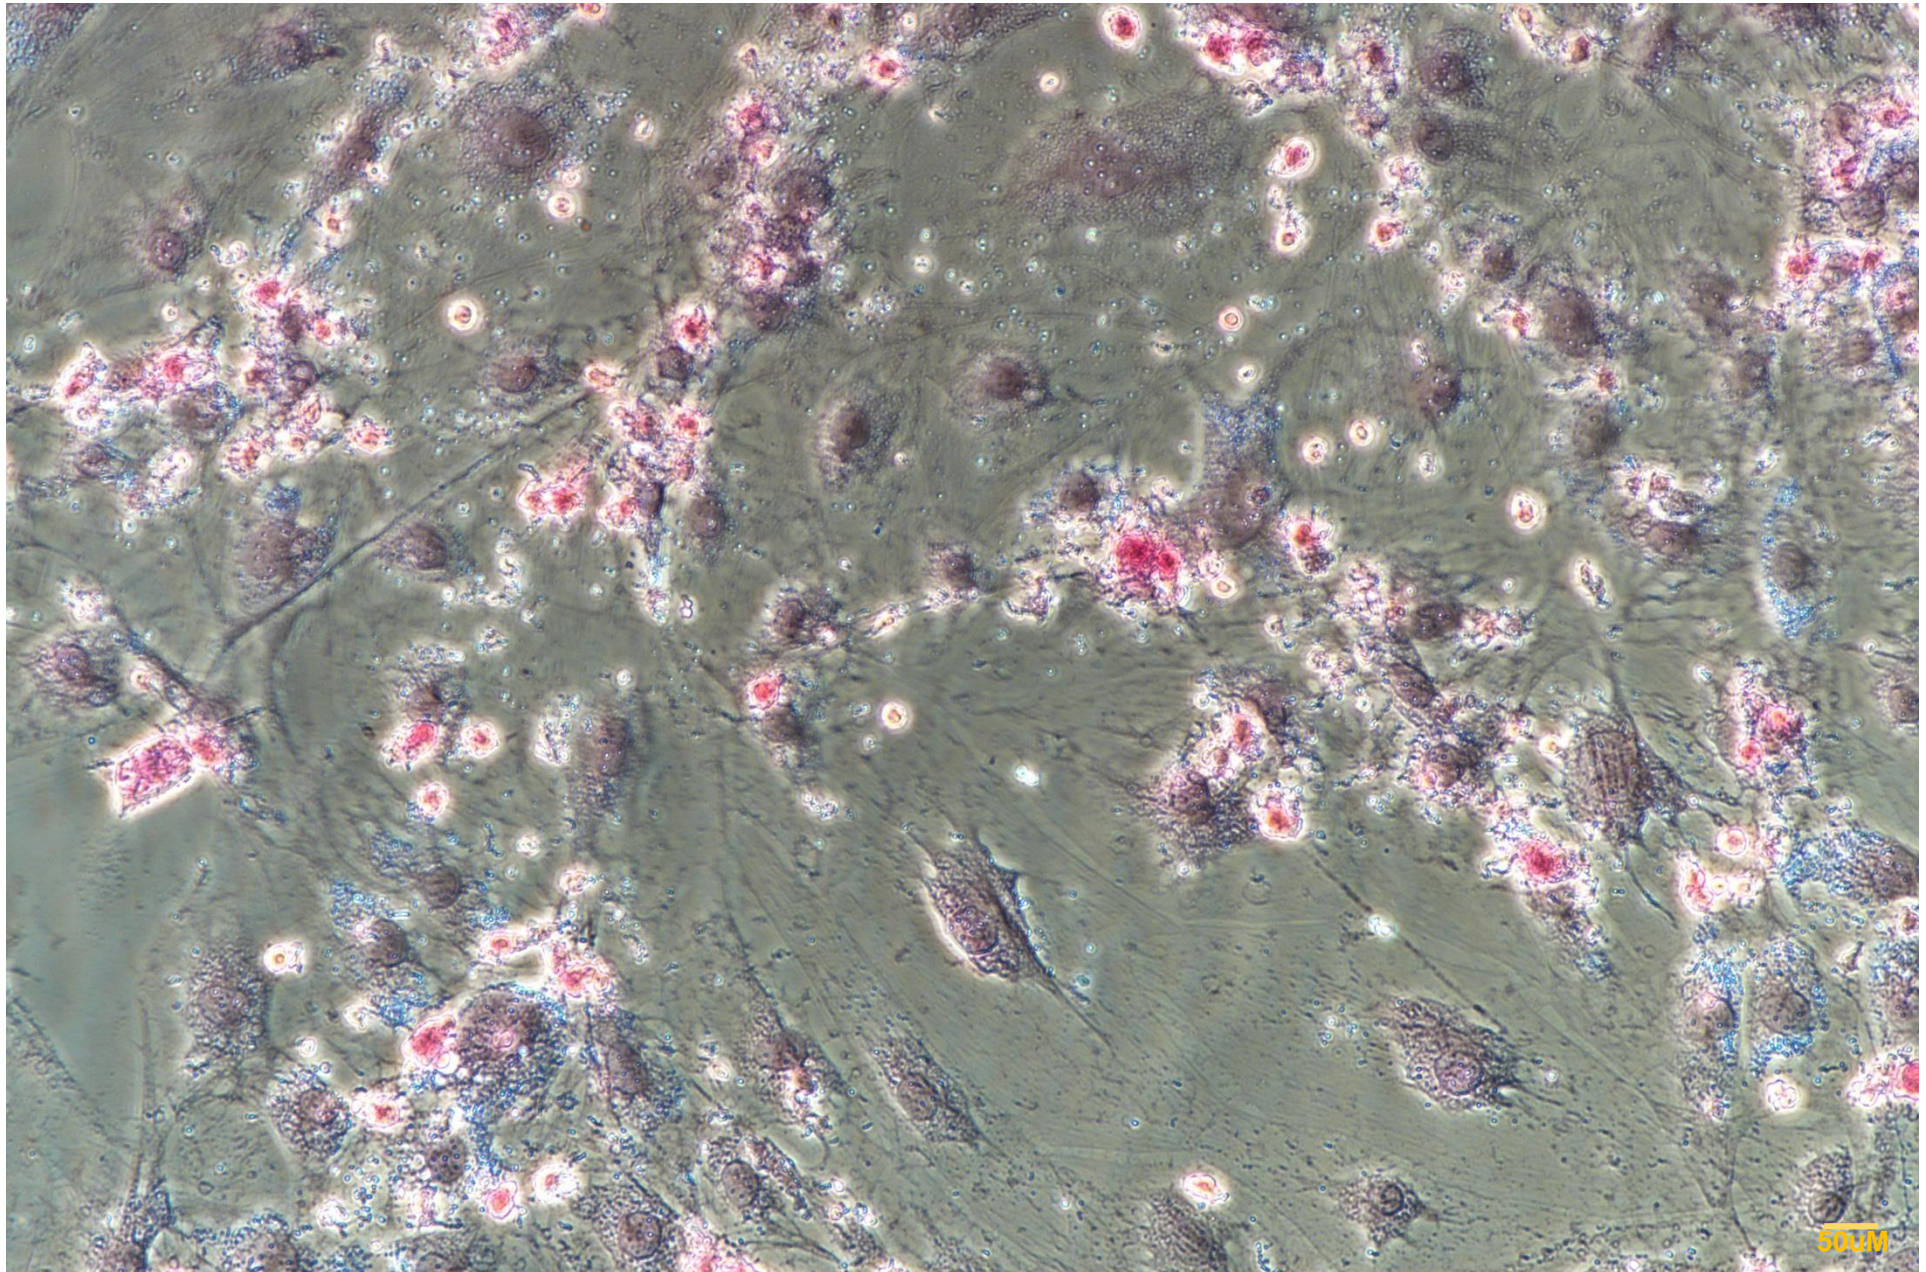

**D-0 AM (HG, noGlut)**

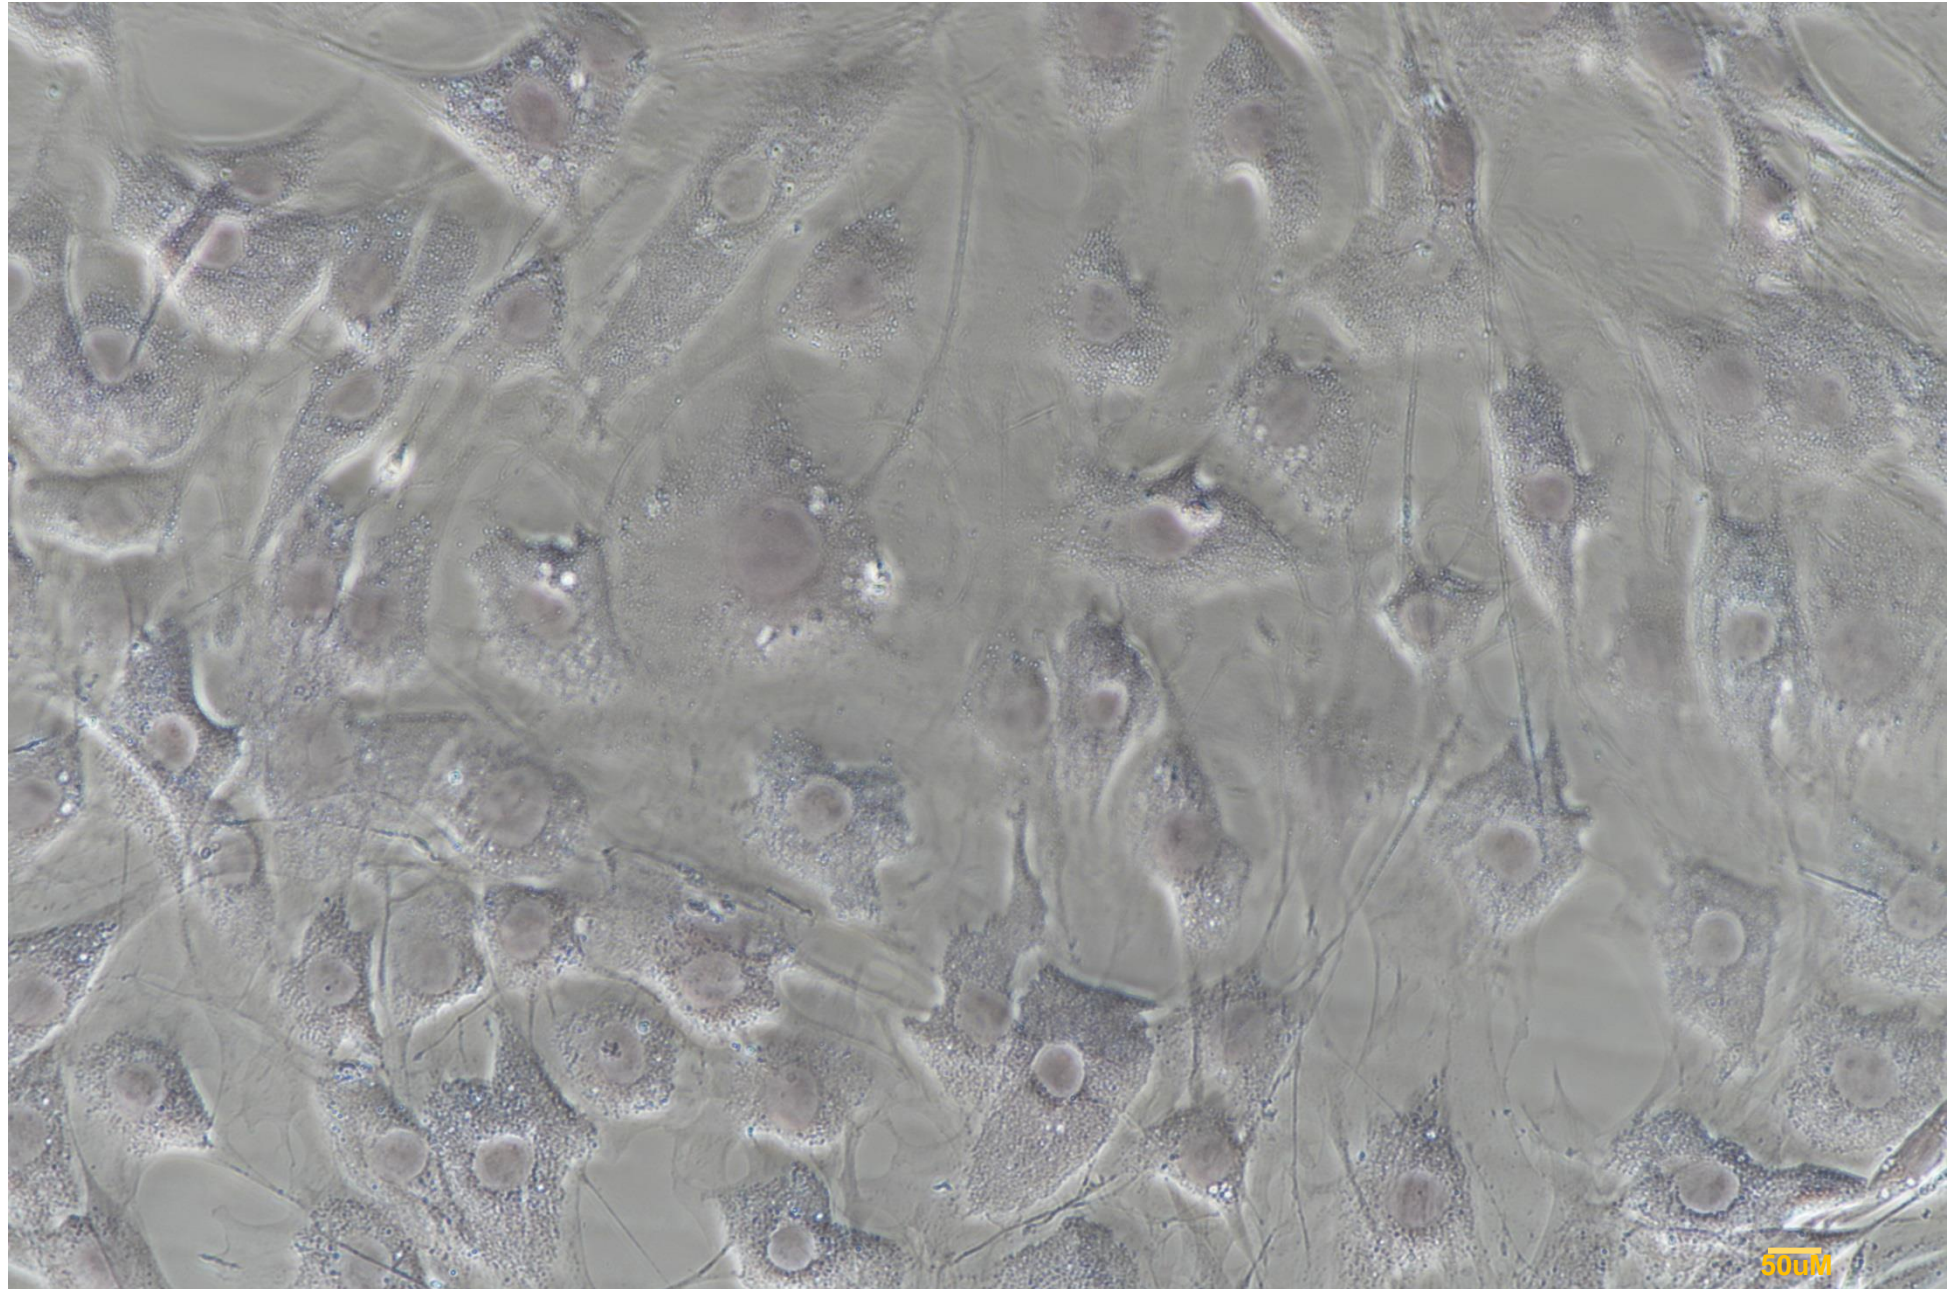

**D-8 AM (HG, noGlut)**

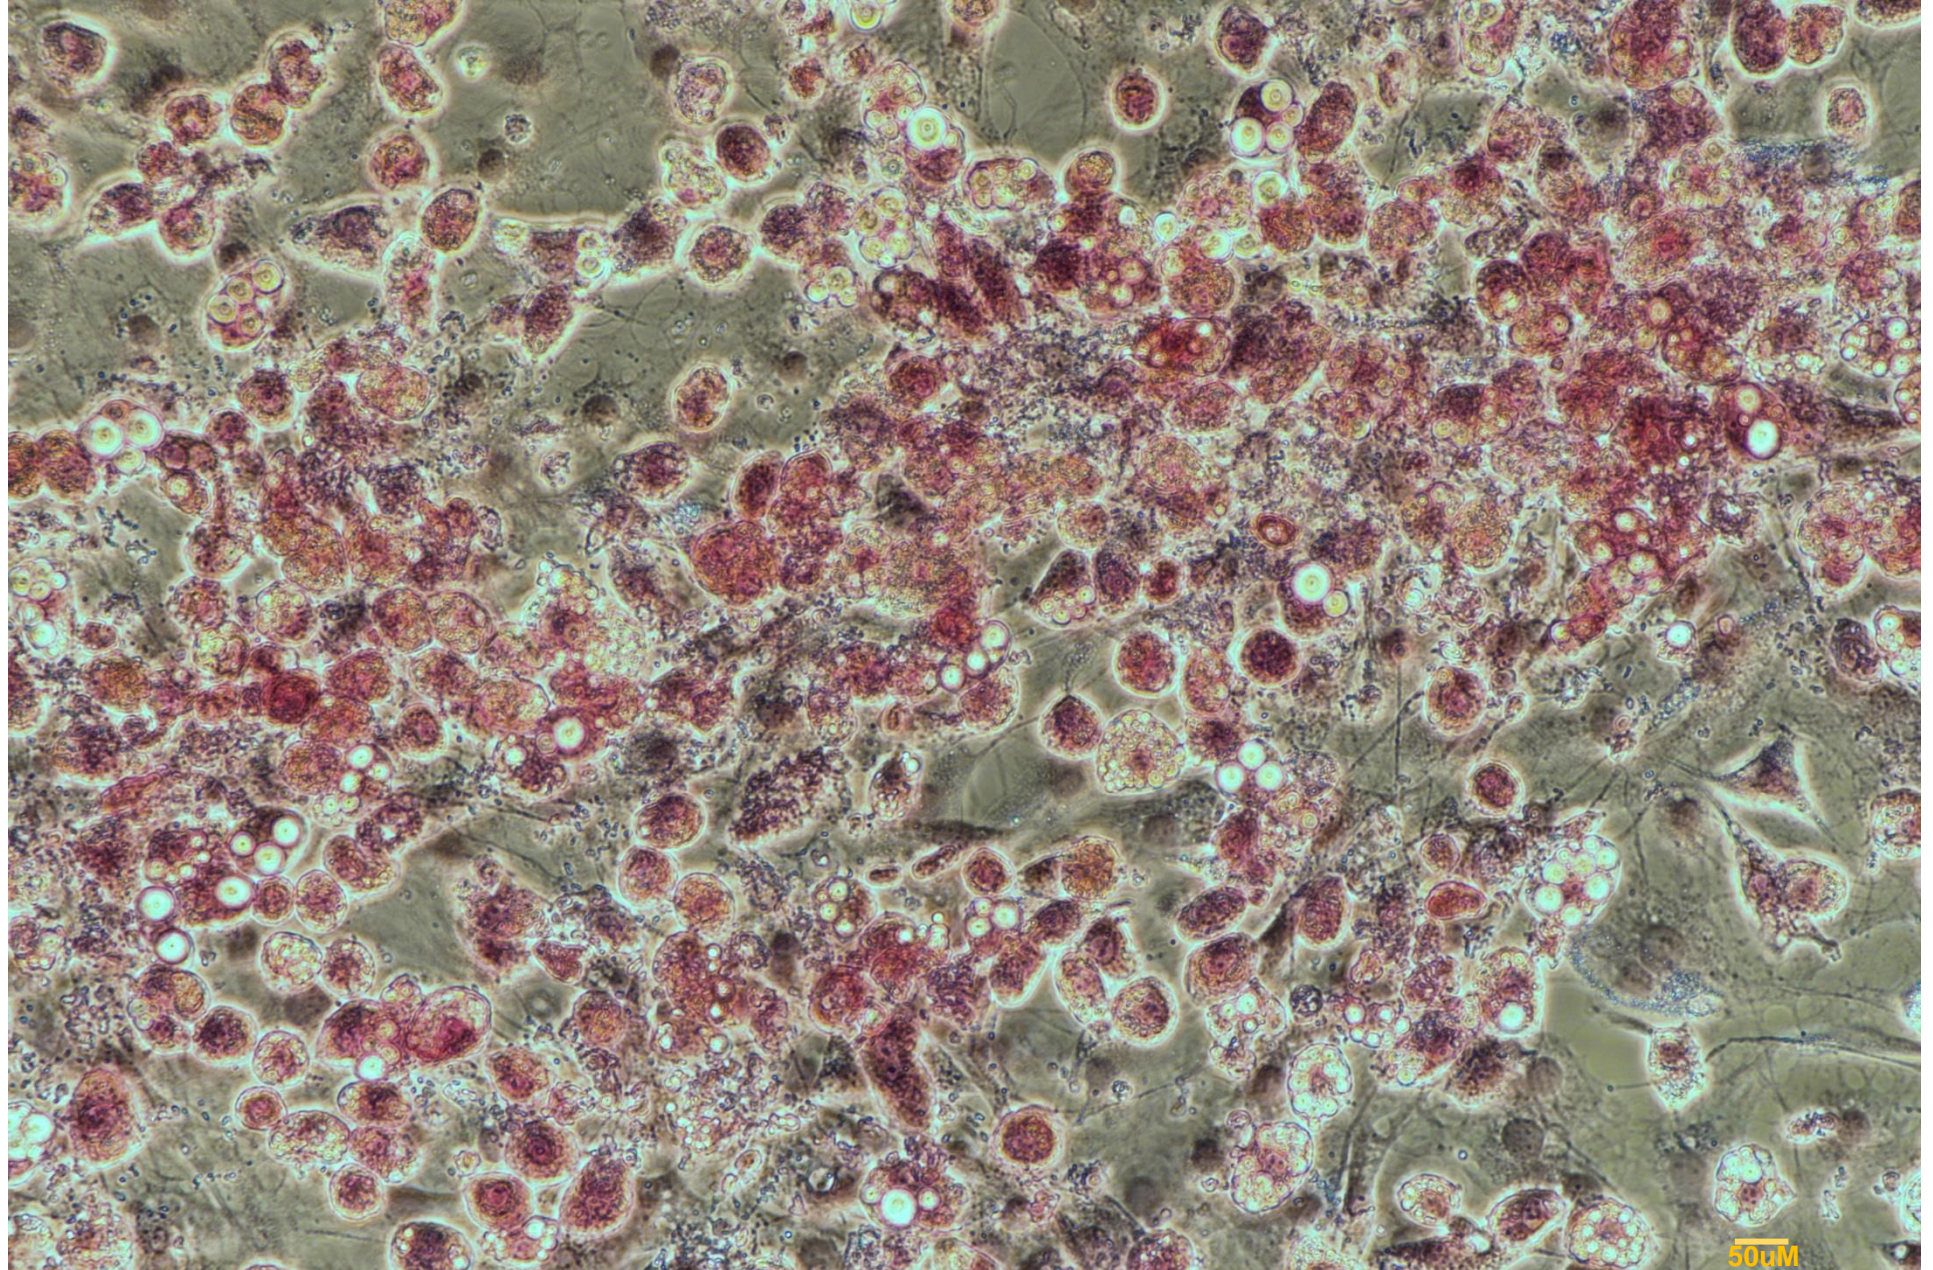



**D-8 AM (LG)**

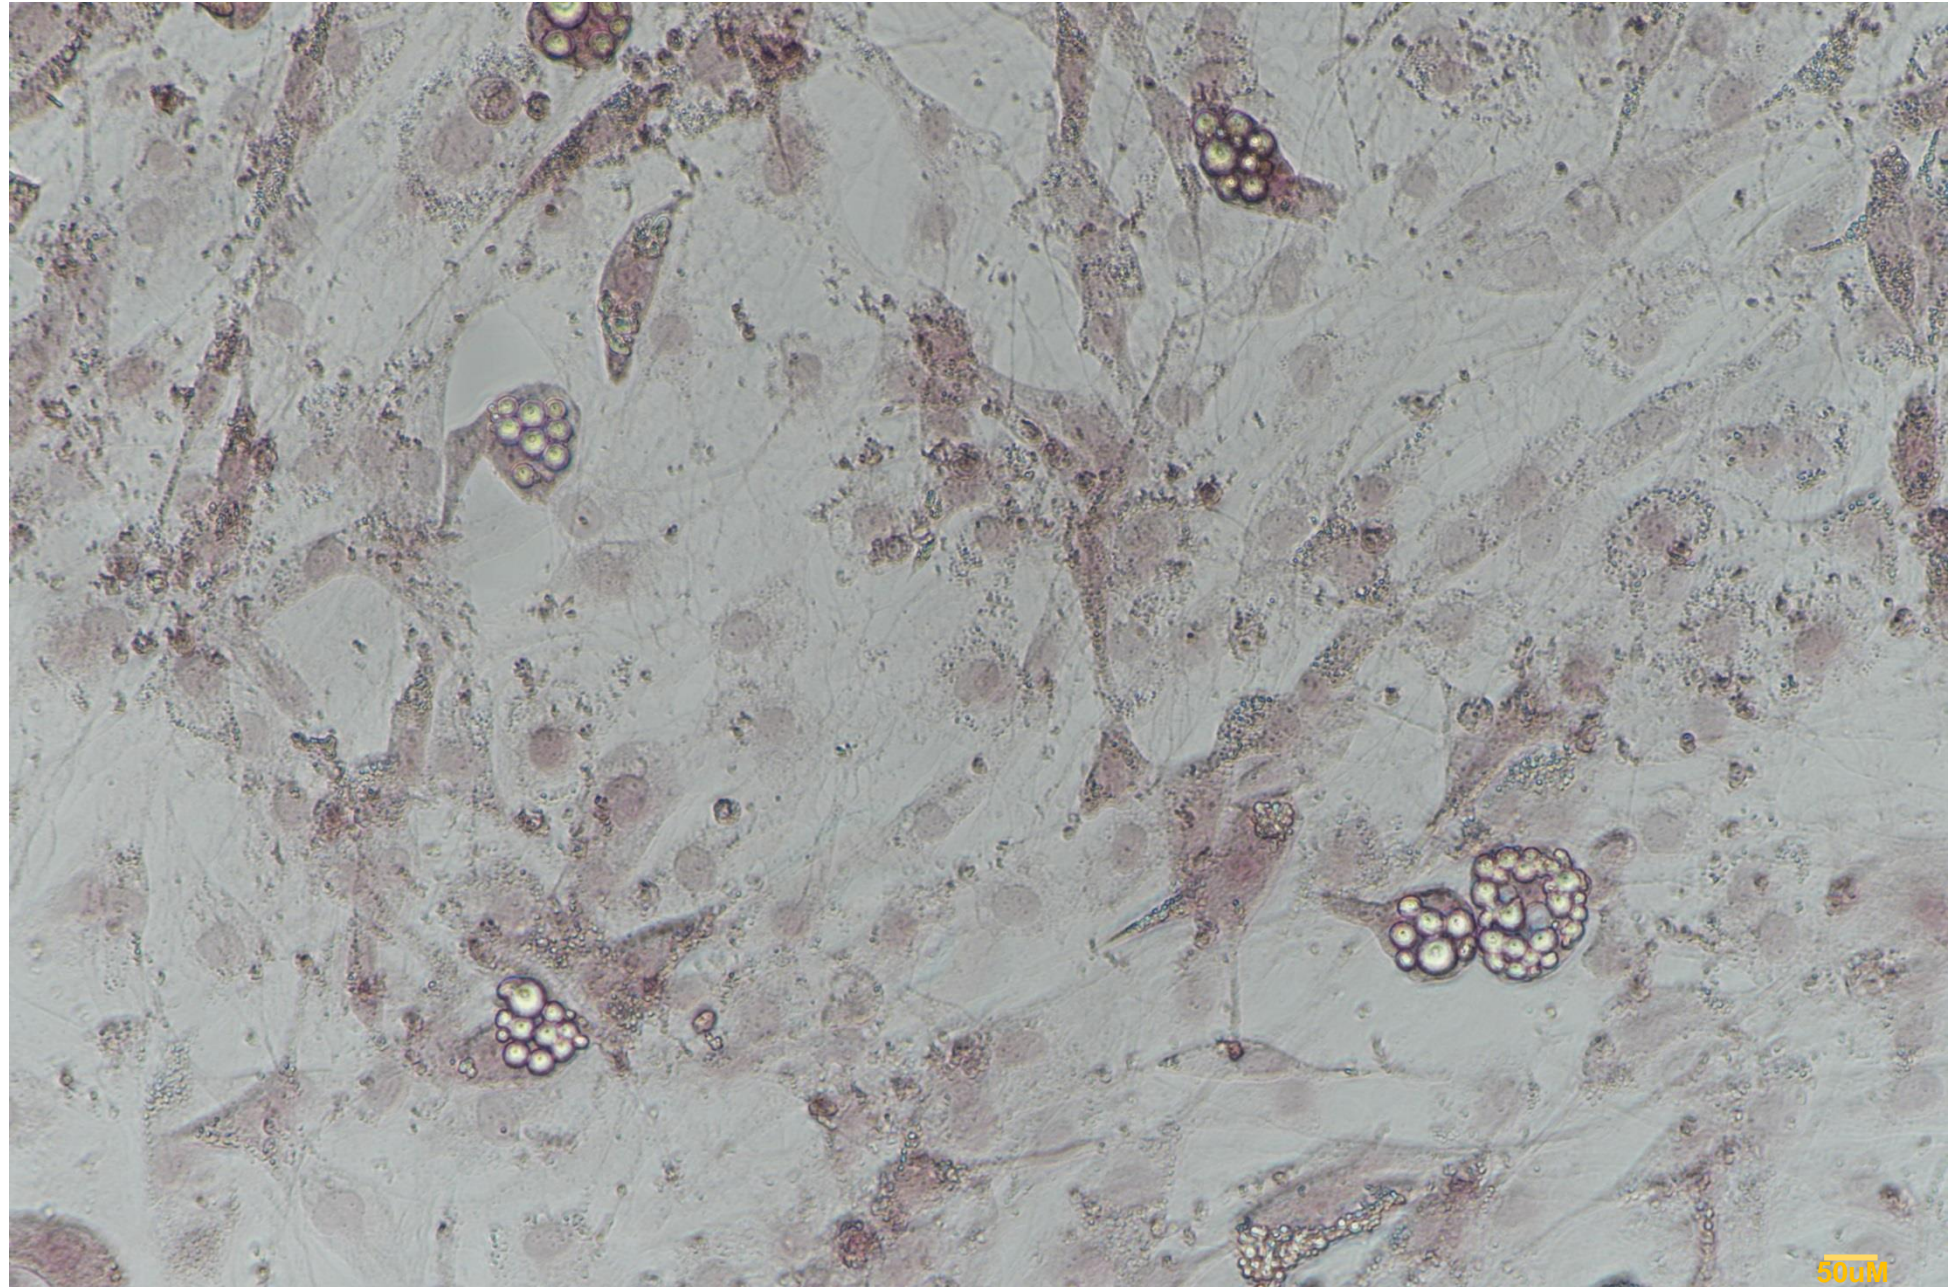

D-8 AM (LG)

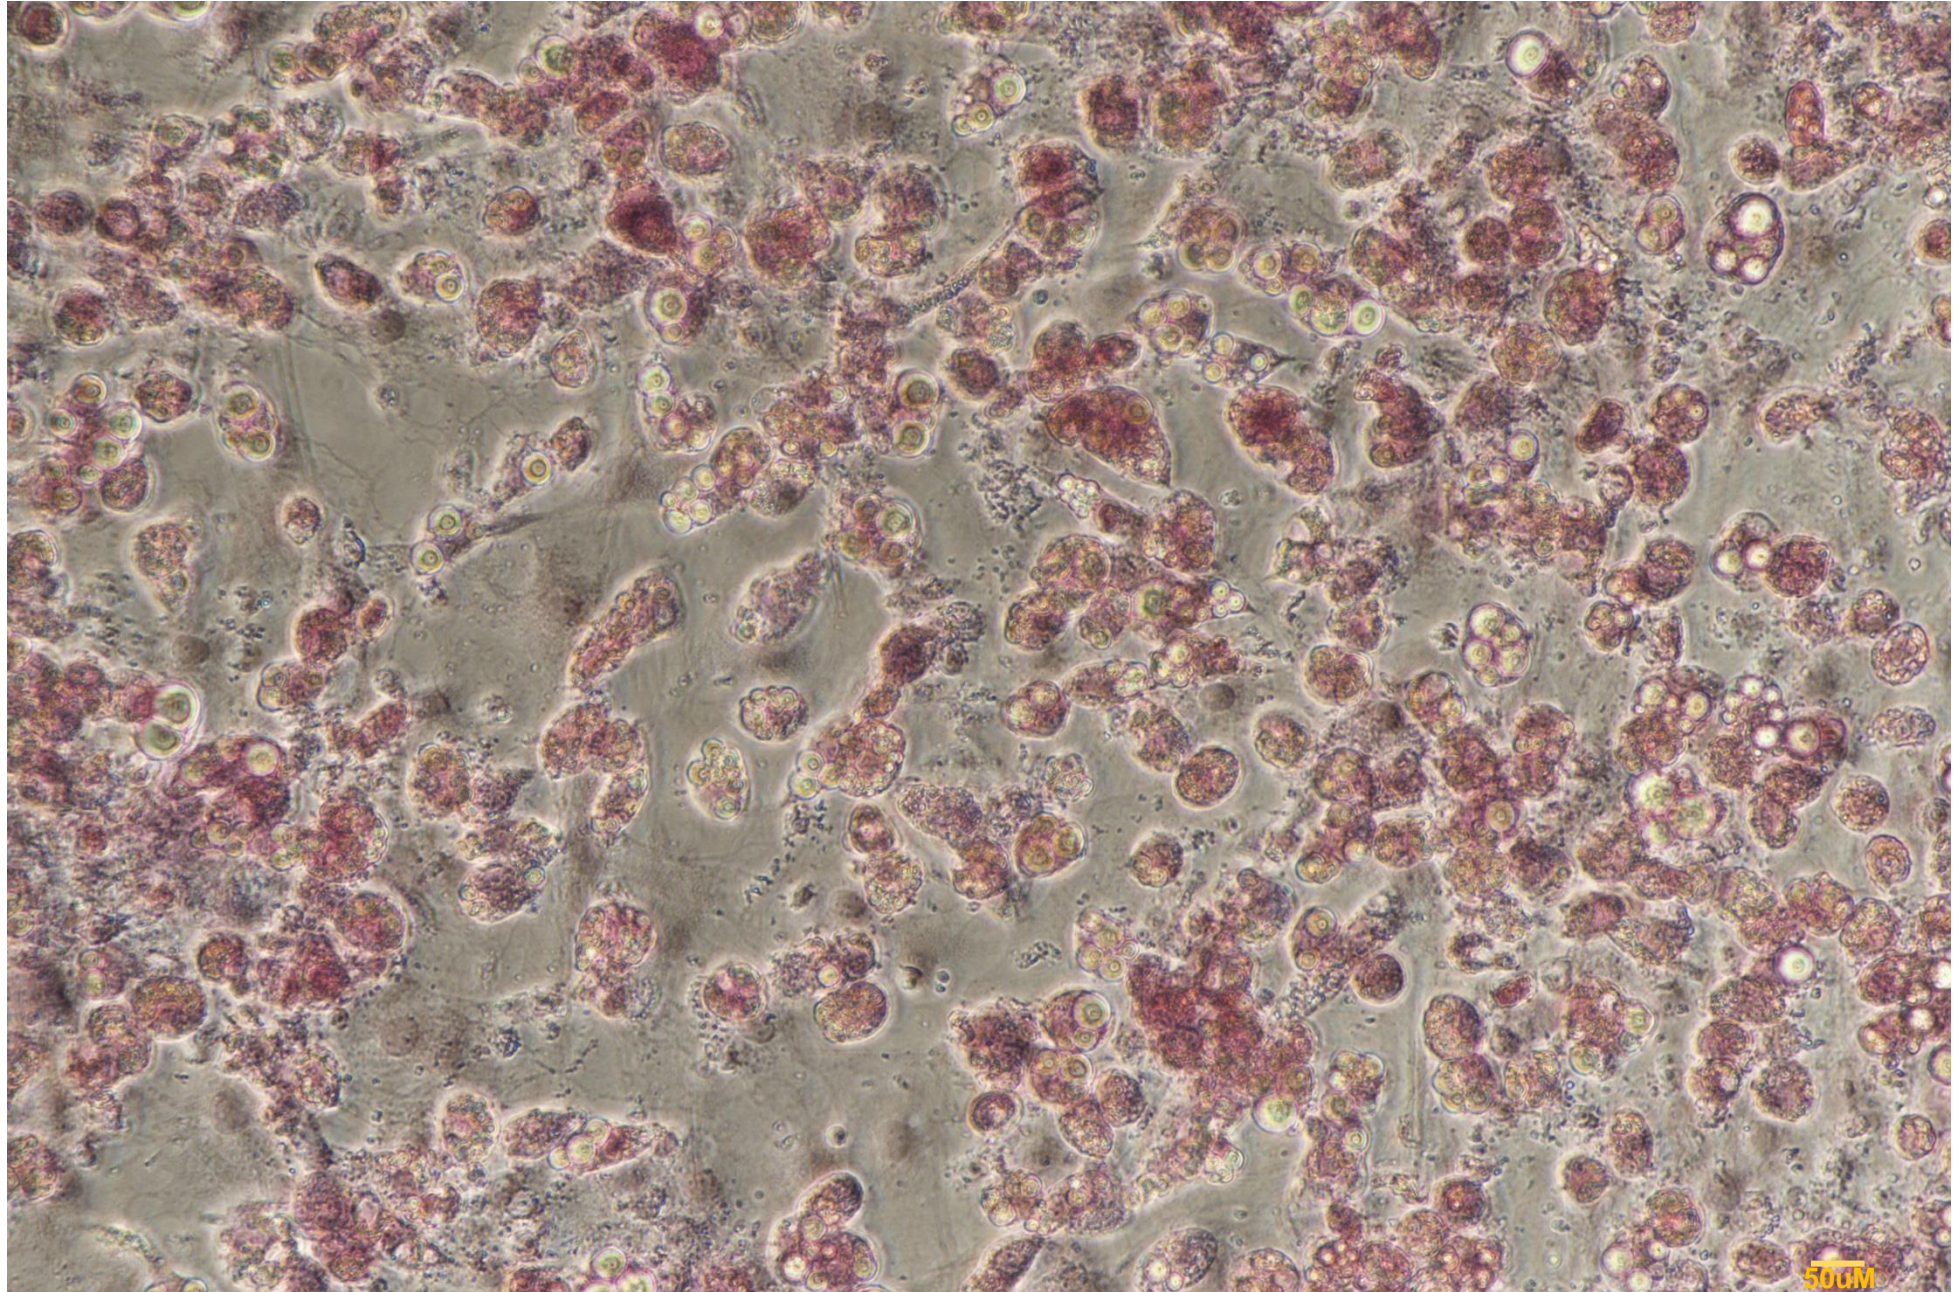

**D-8 AM (HG, HGlut)**

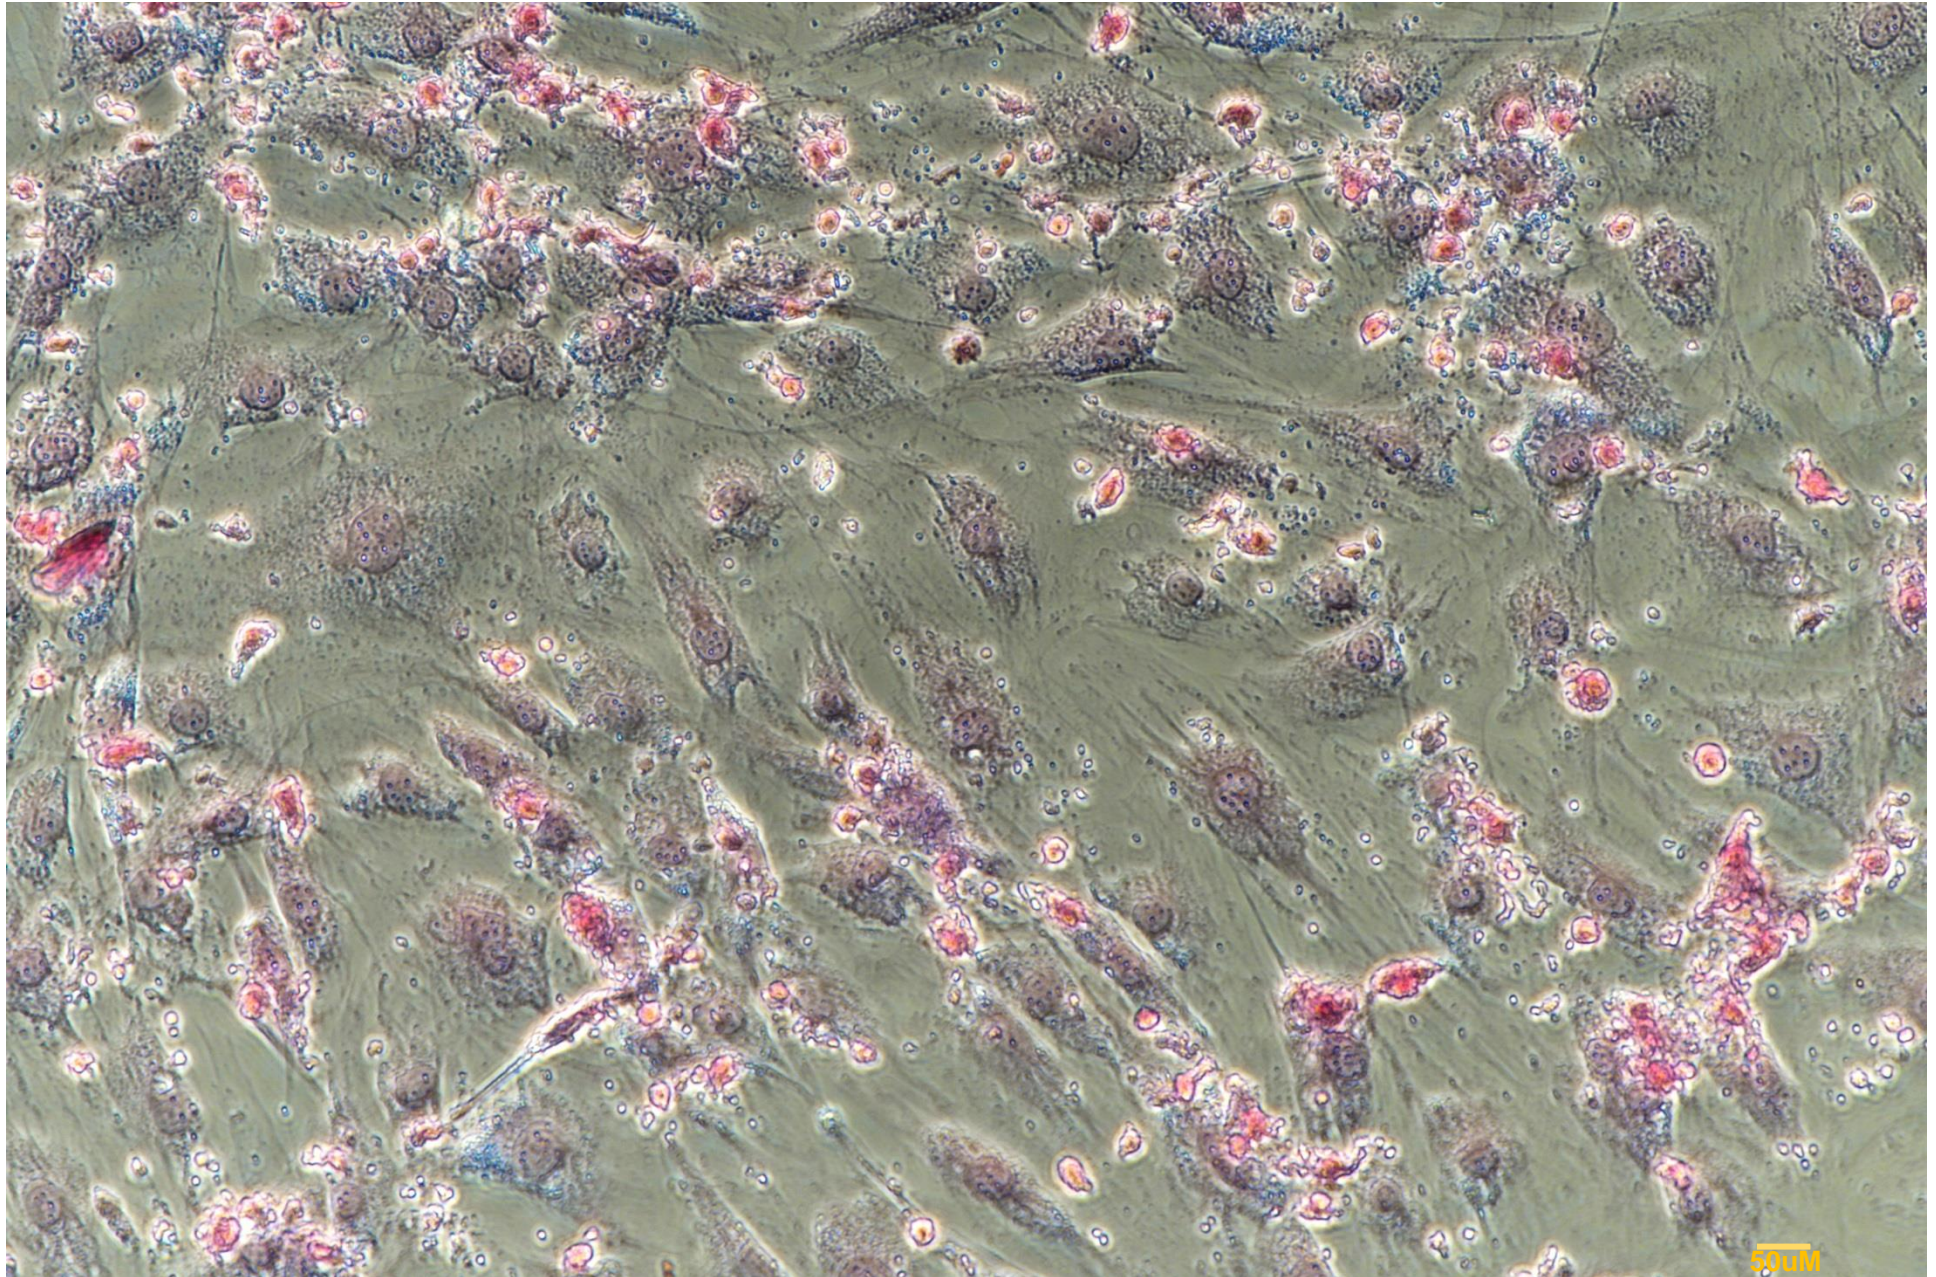

SF.2 C)

D-0 AM

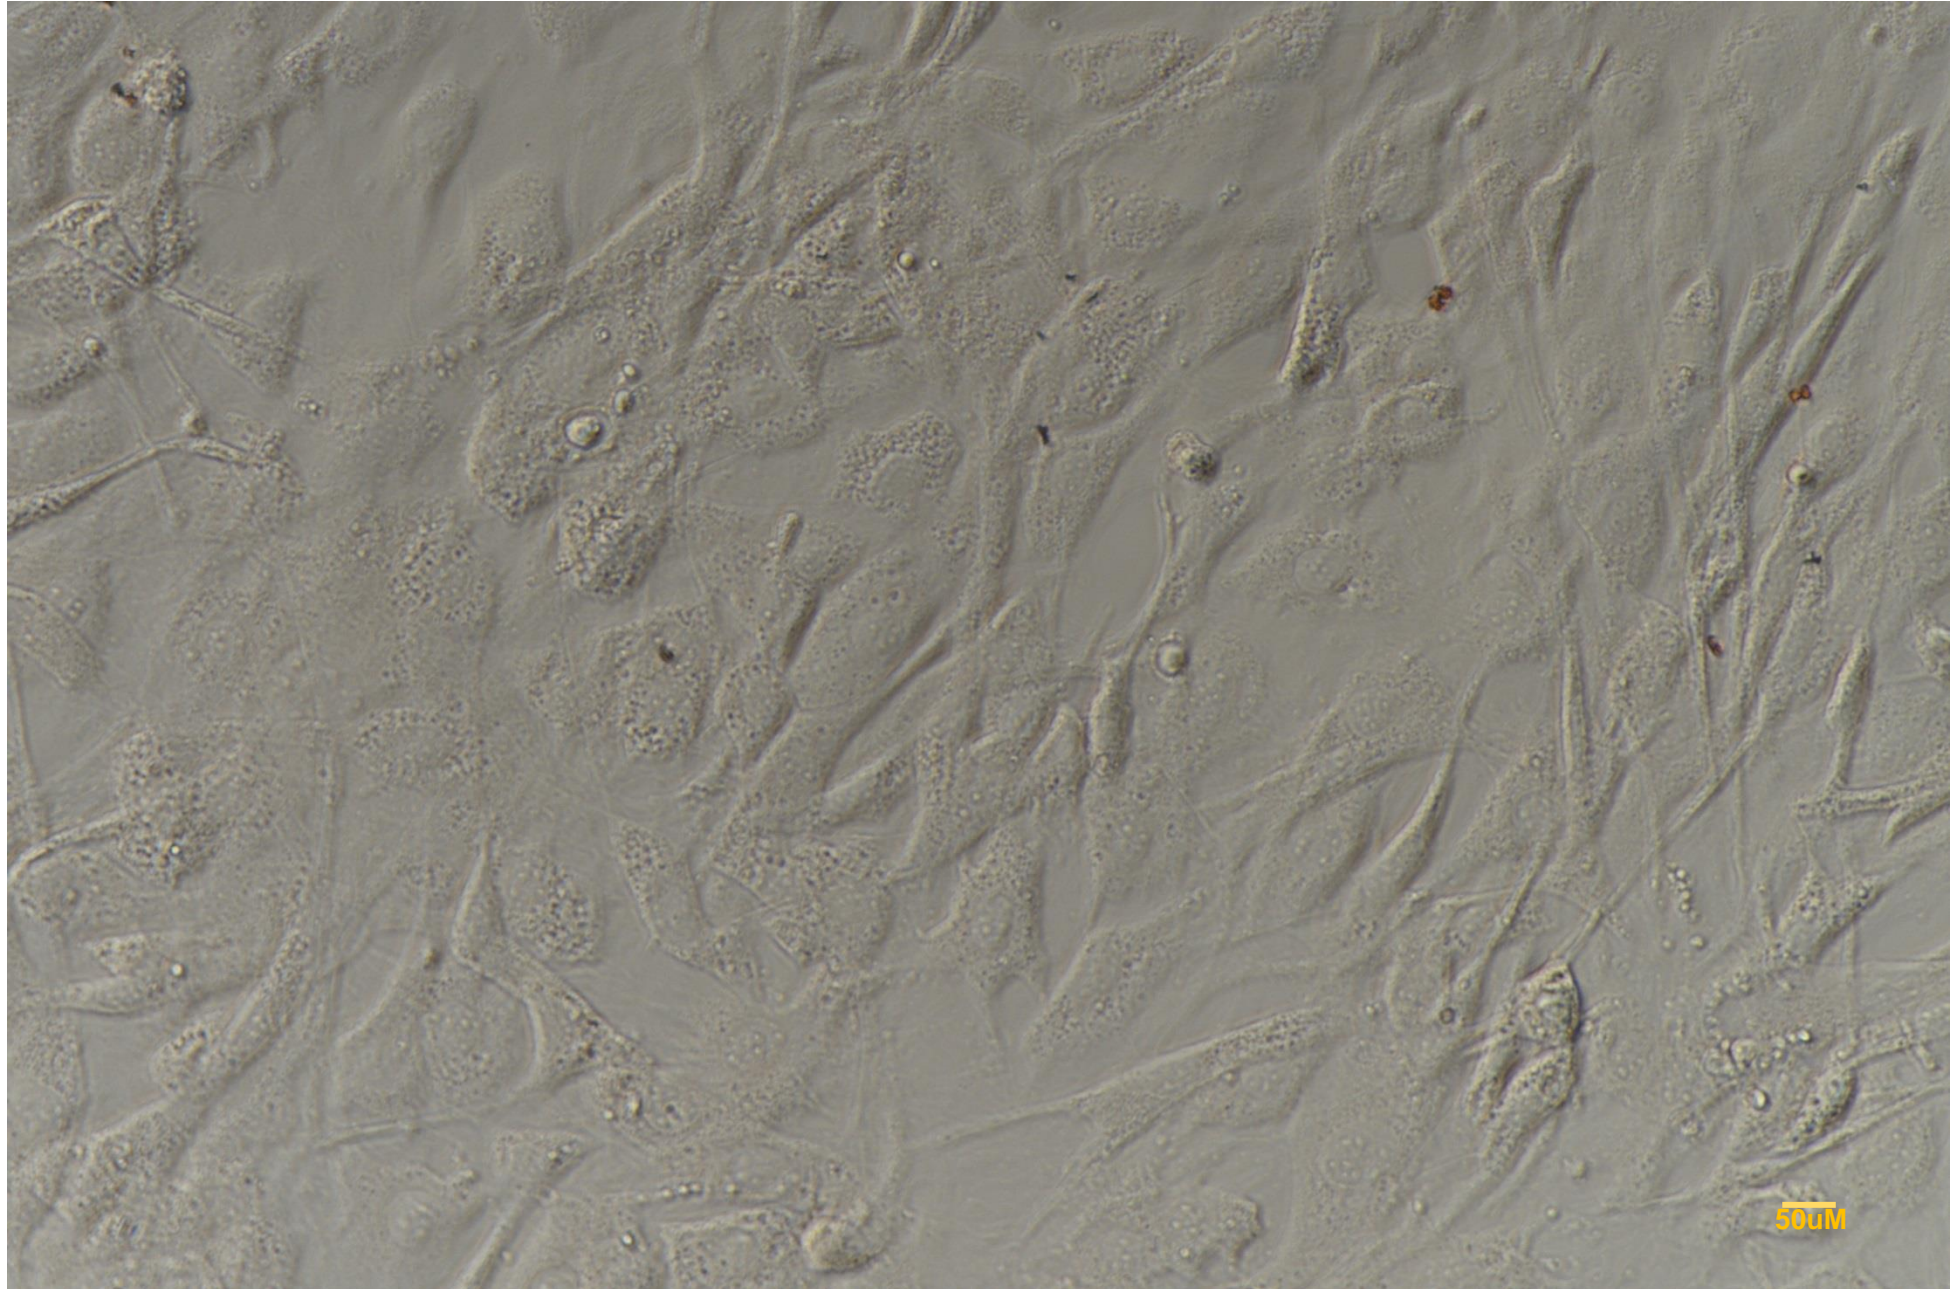

D-8 AM

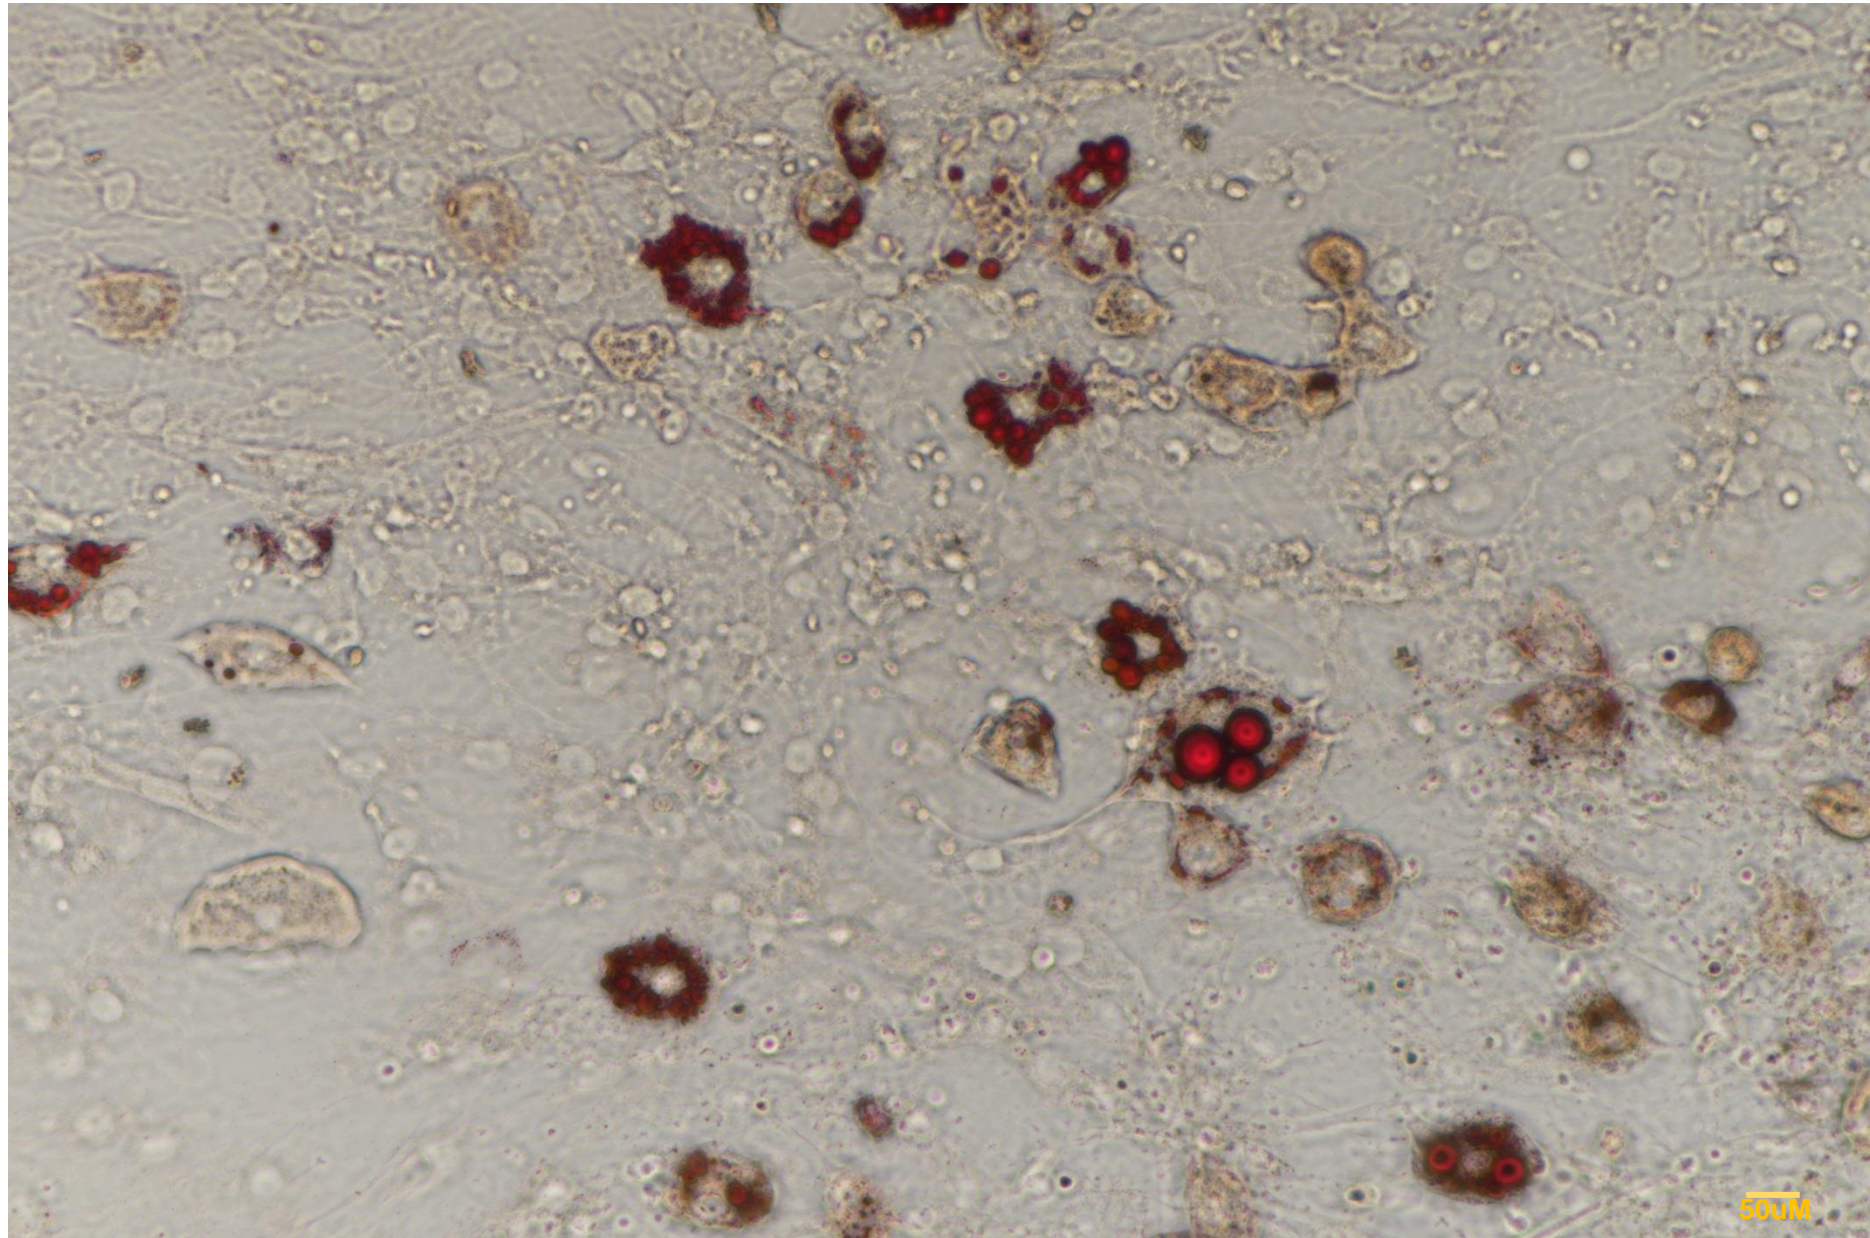

D-0

AM (HG)

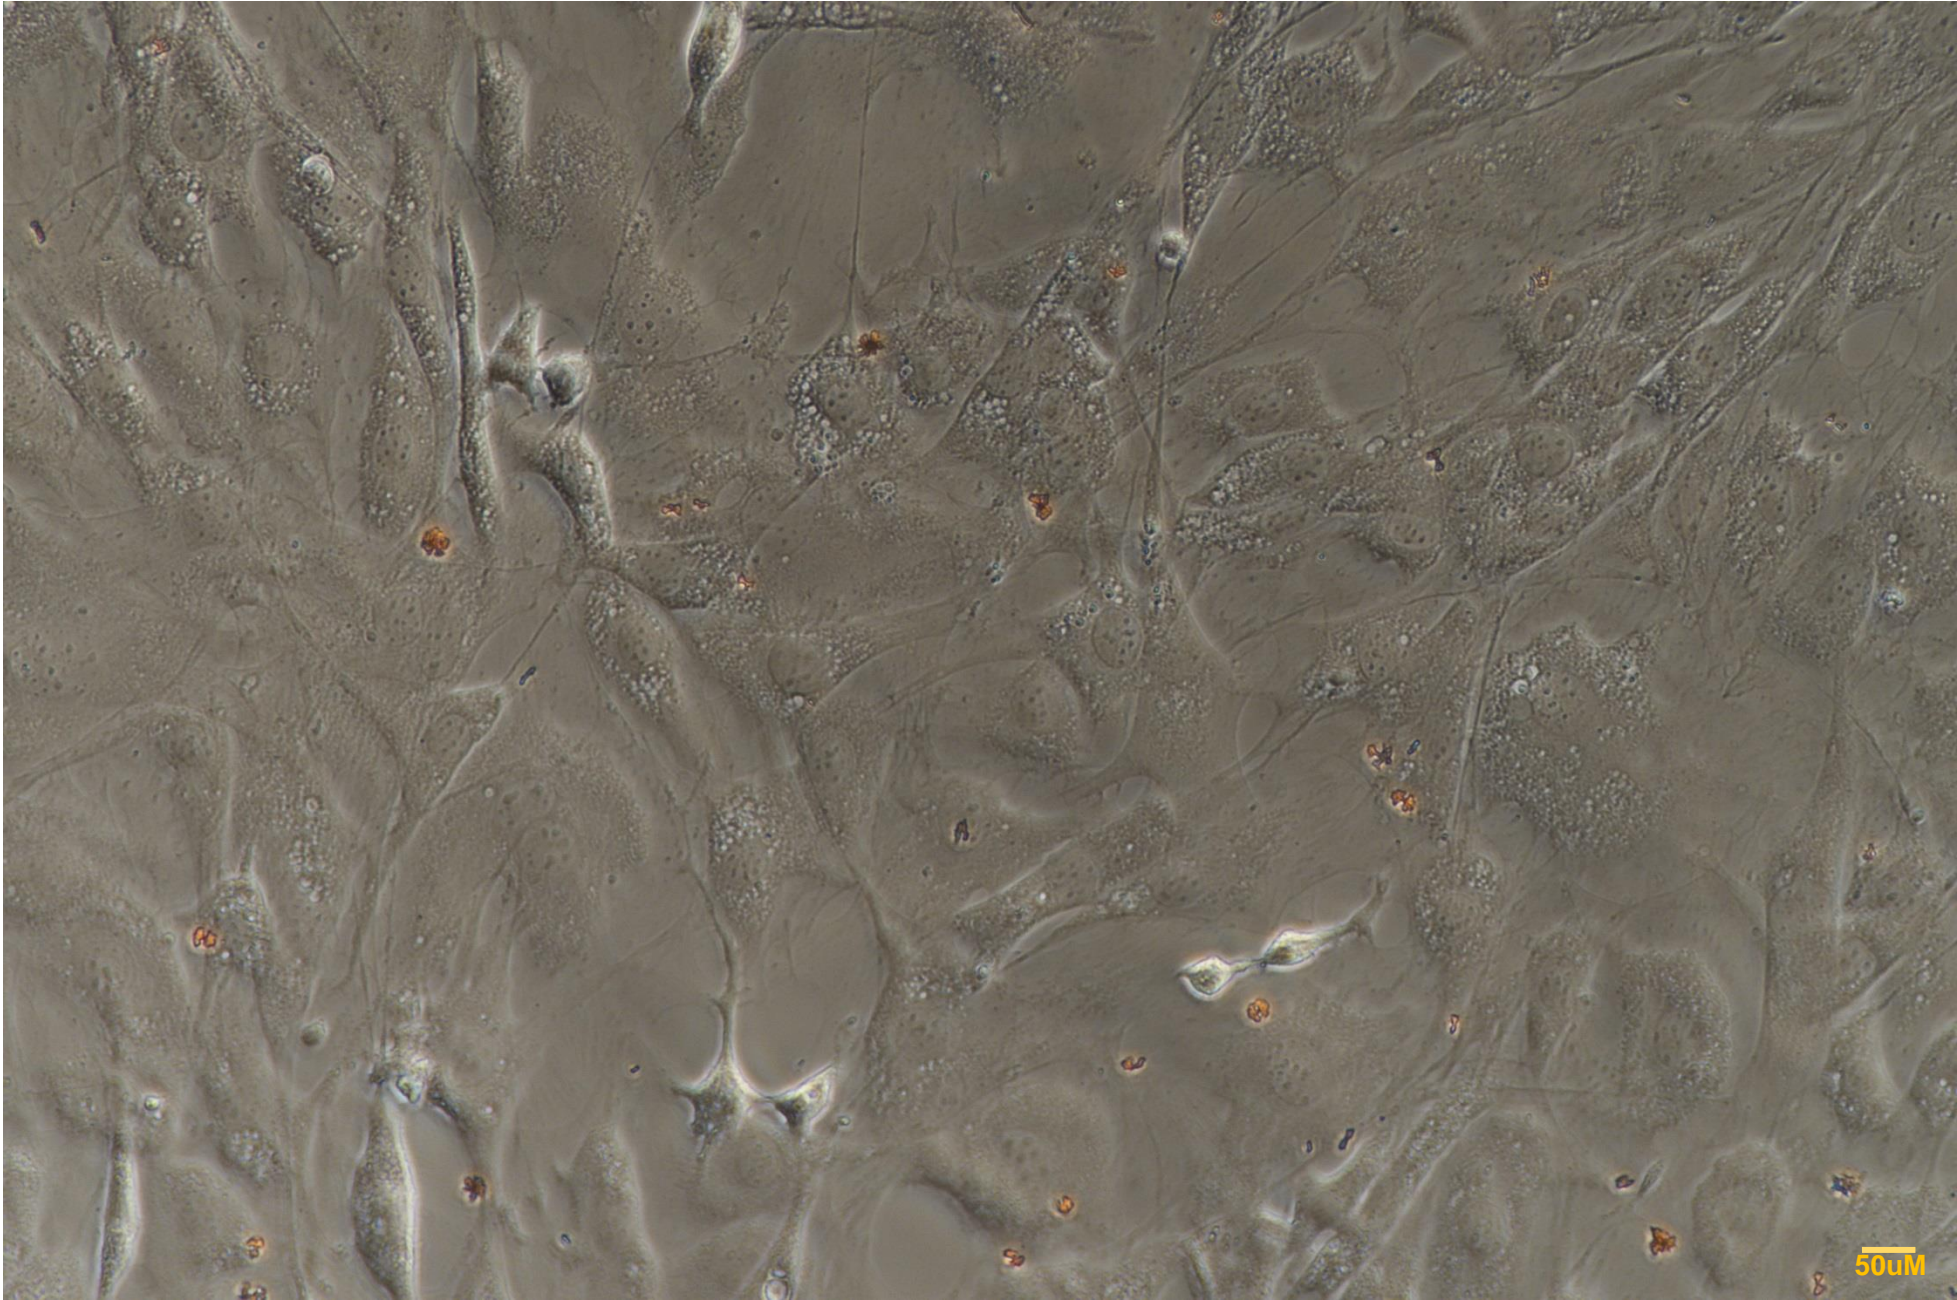

50uM

D-8 AM (HG)

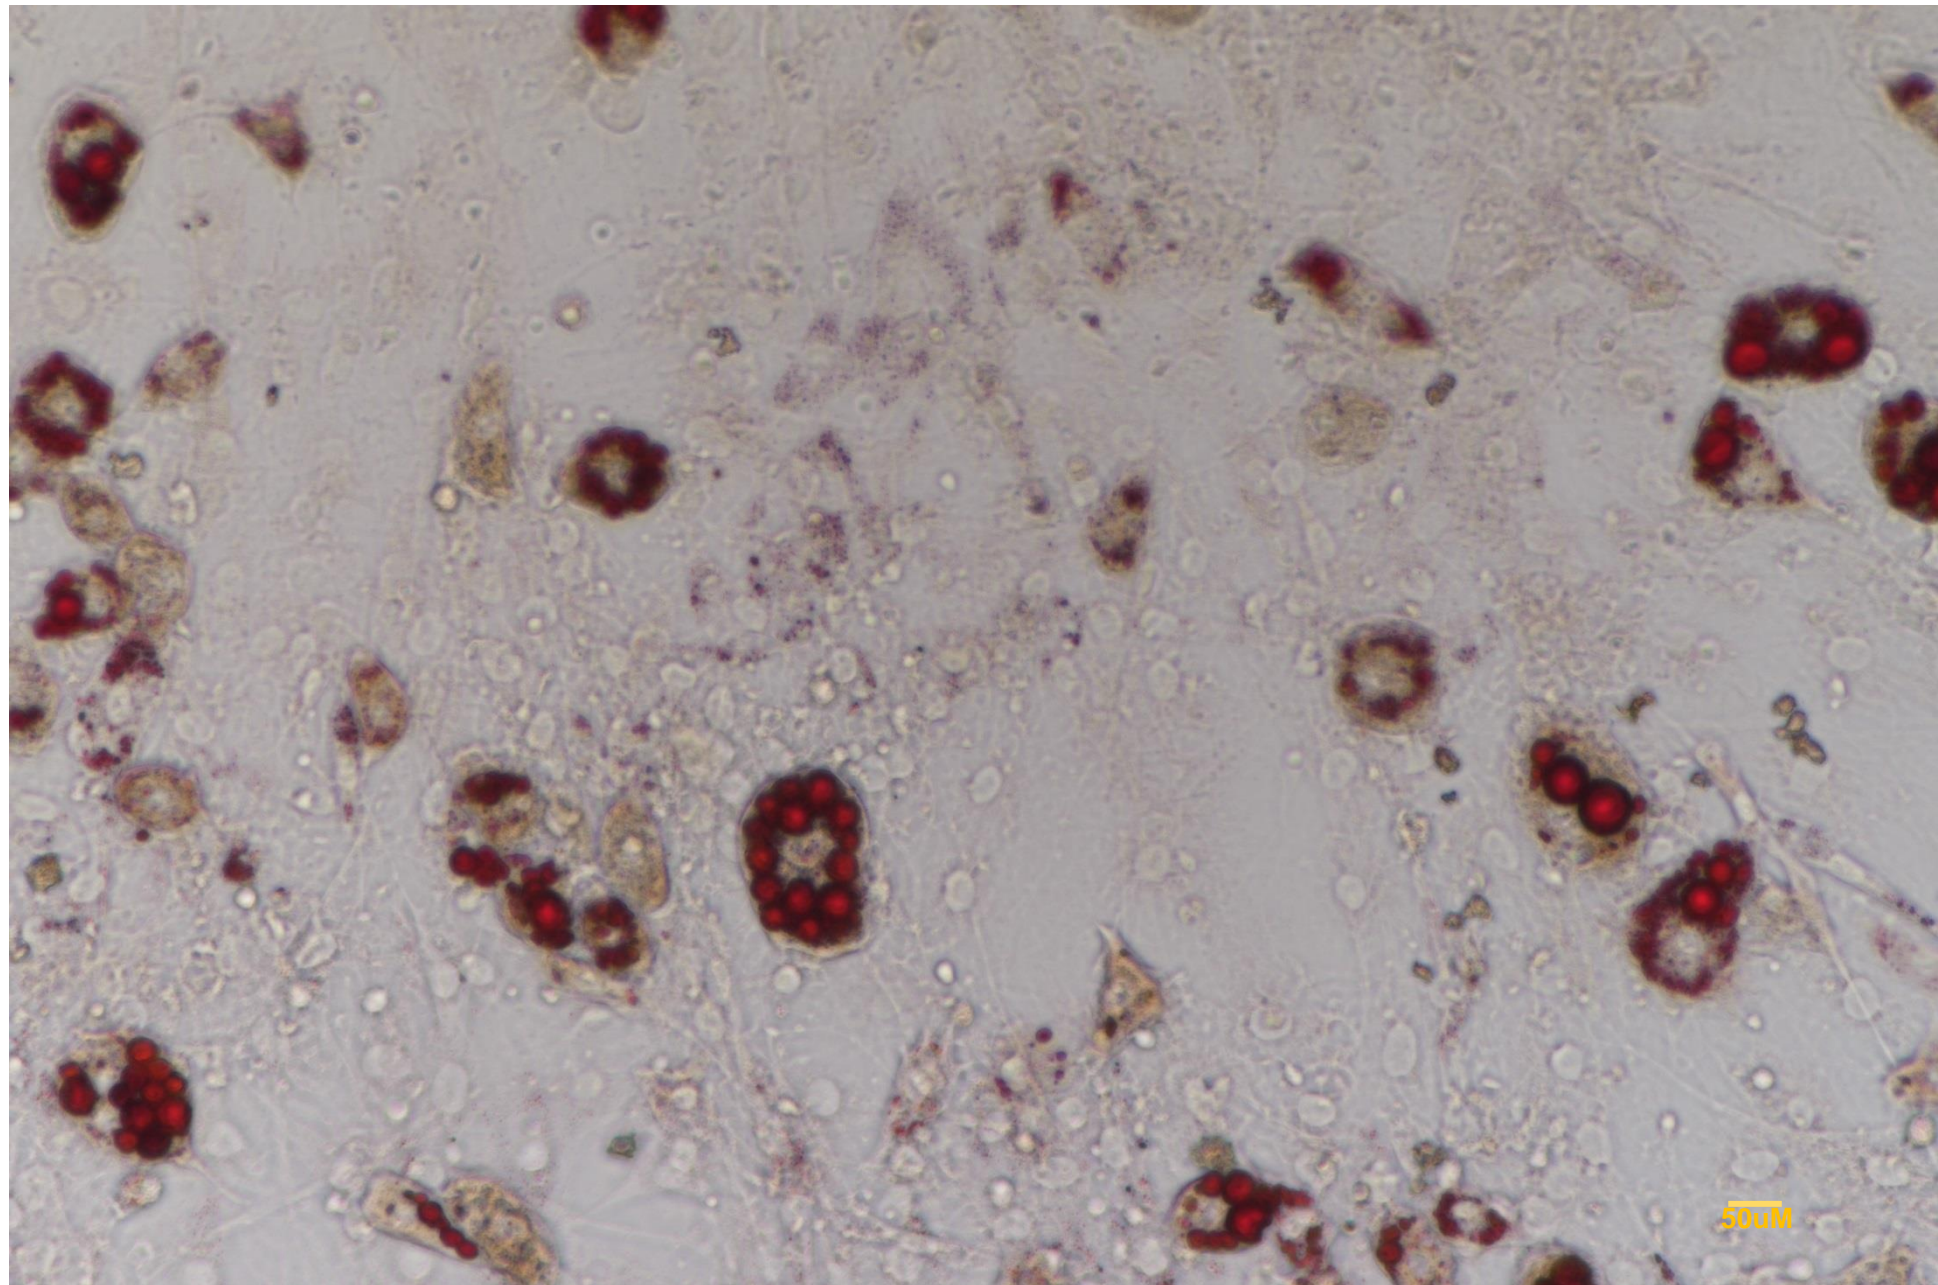

D-0 AM (HG, noGlut)

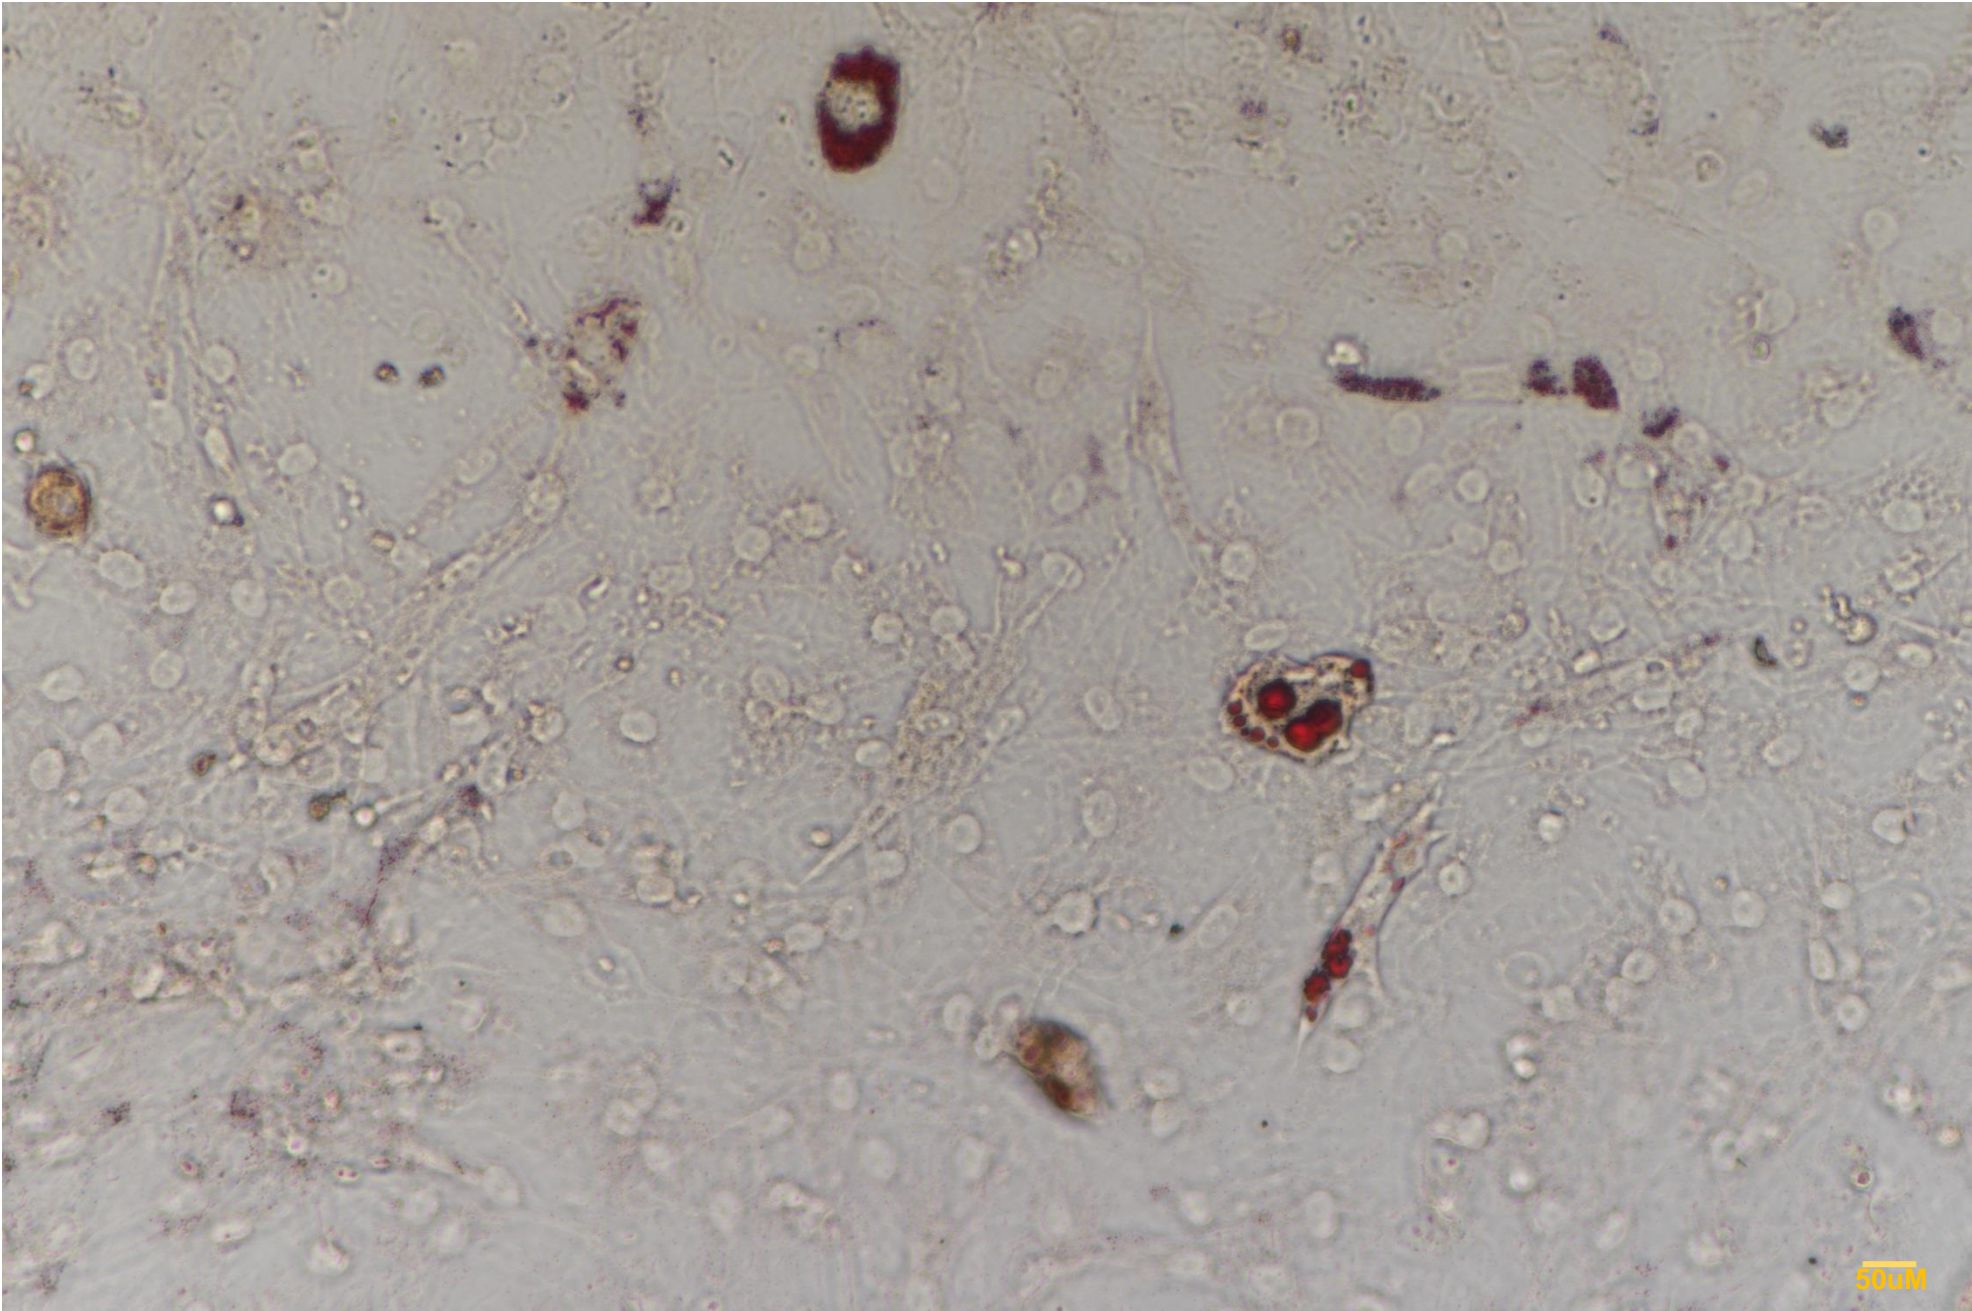



**D-8 AM (HG, noGlut)**

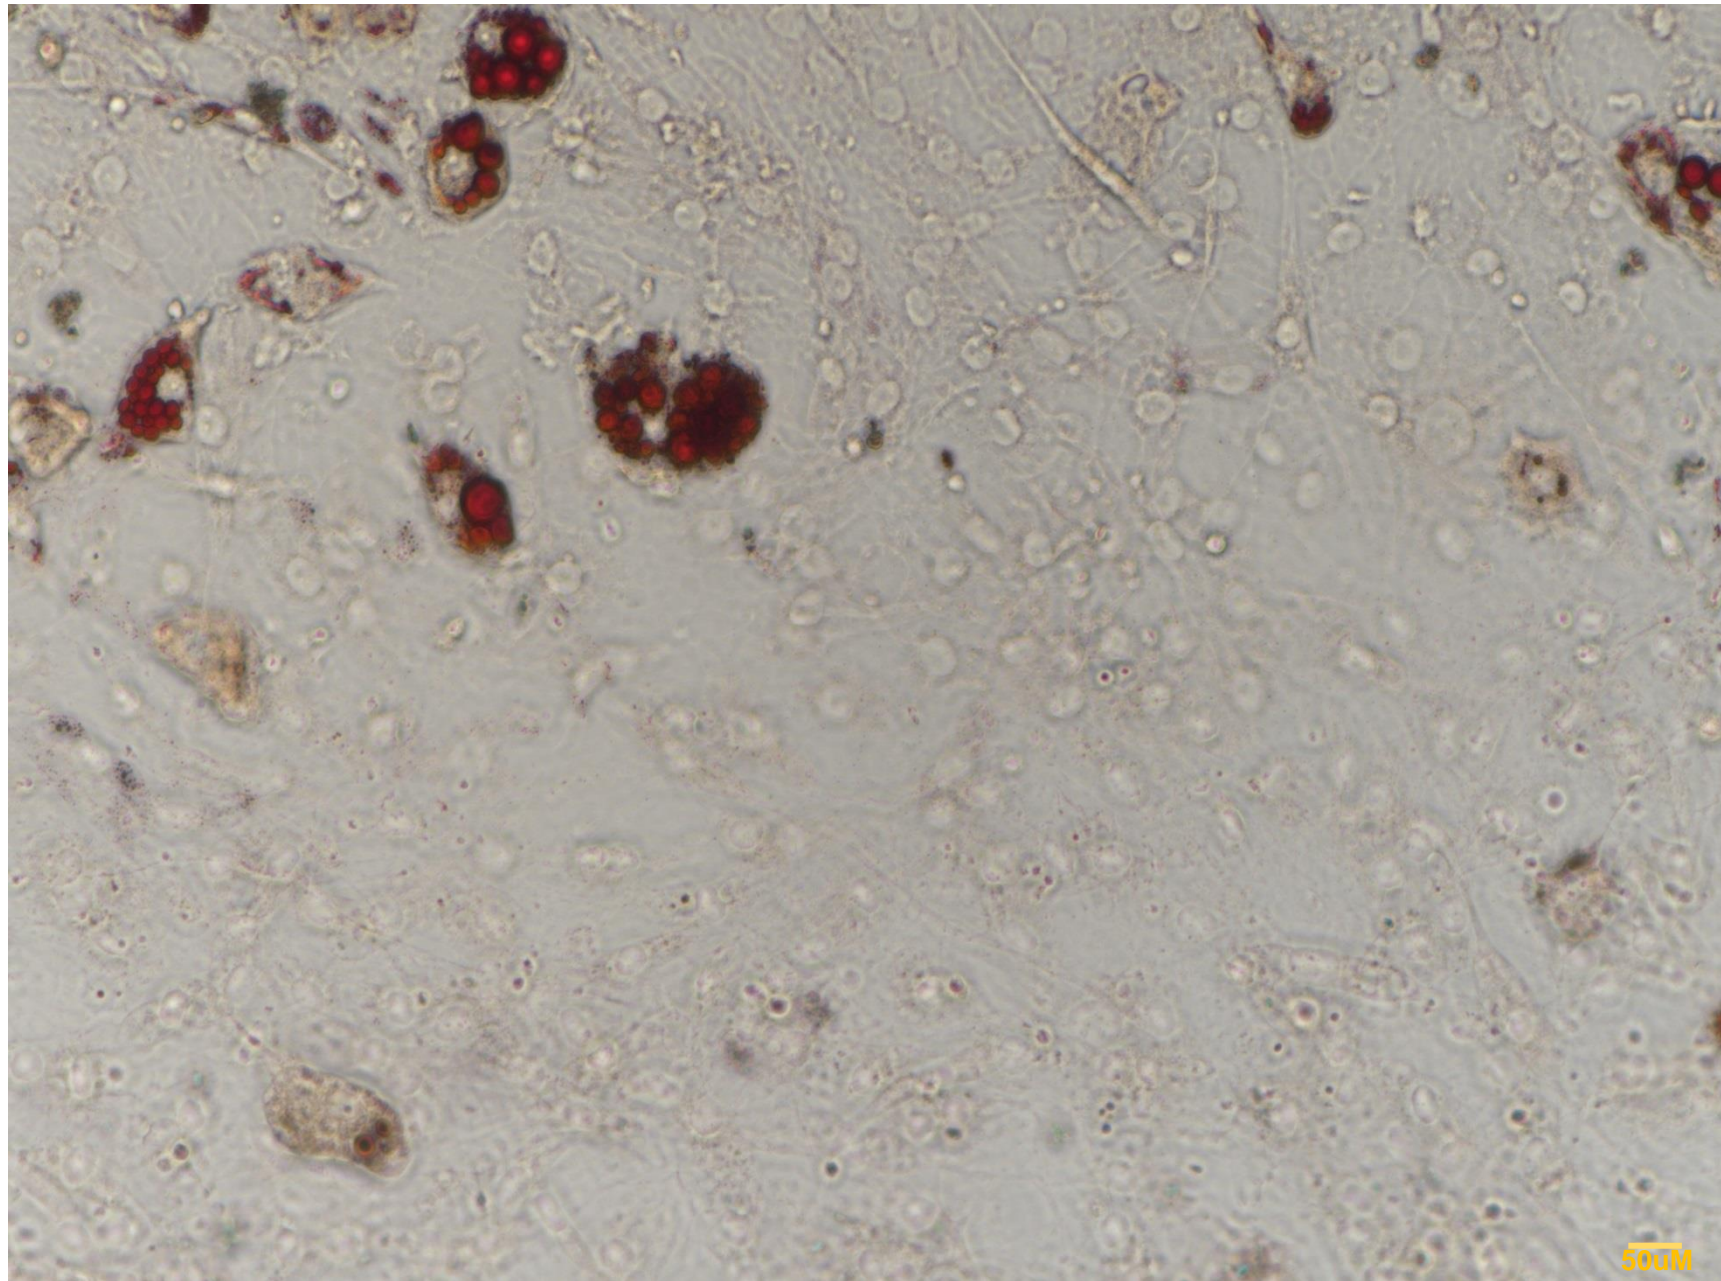

**D-0 AM (LG)**

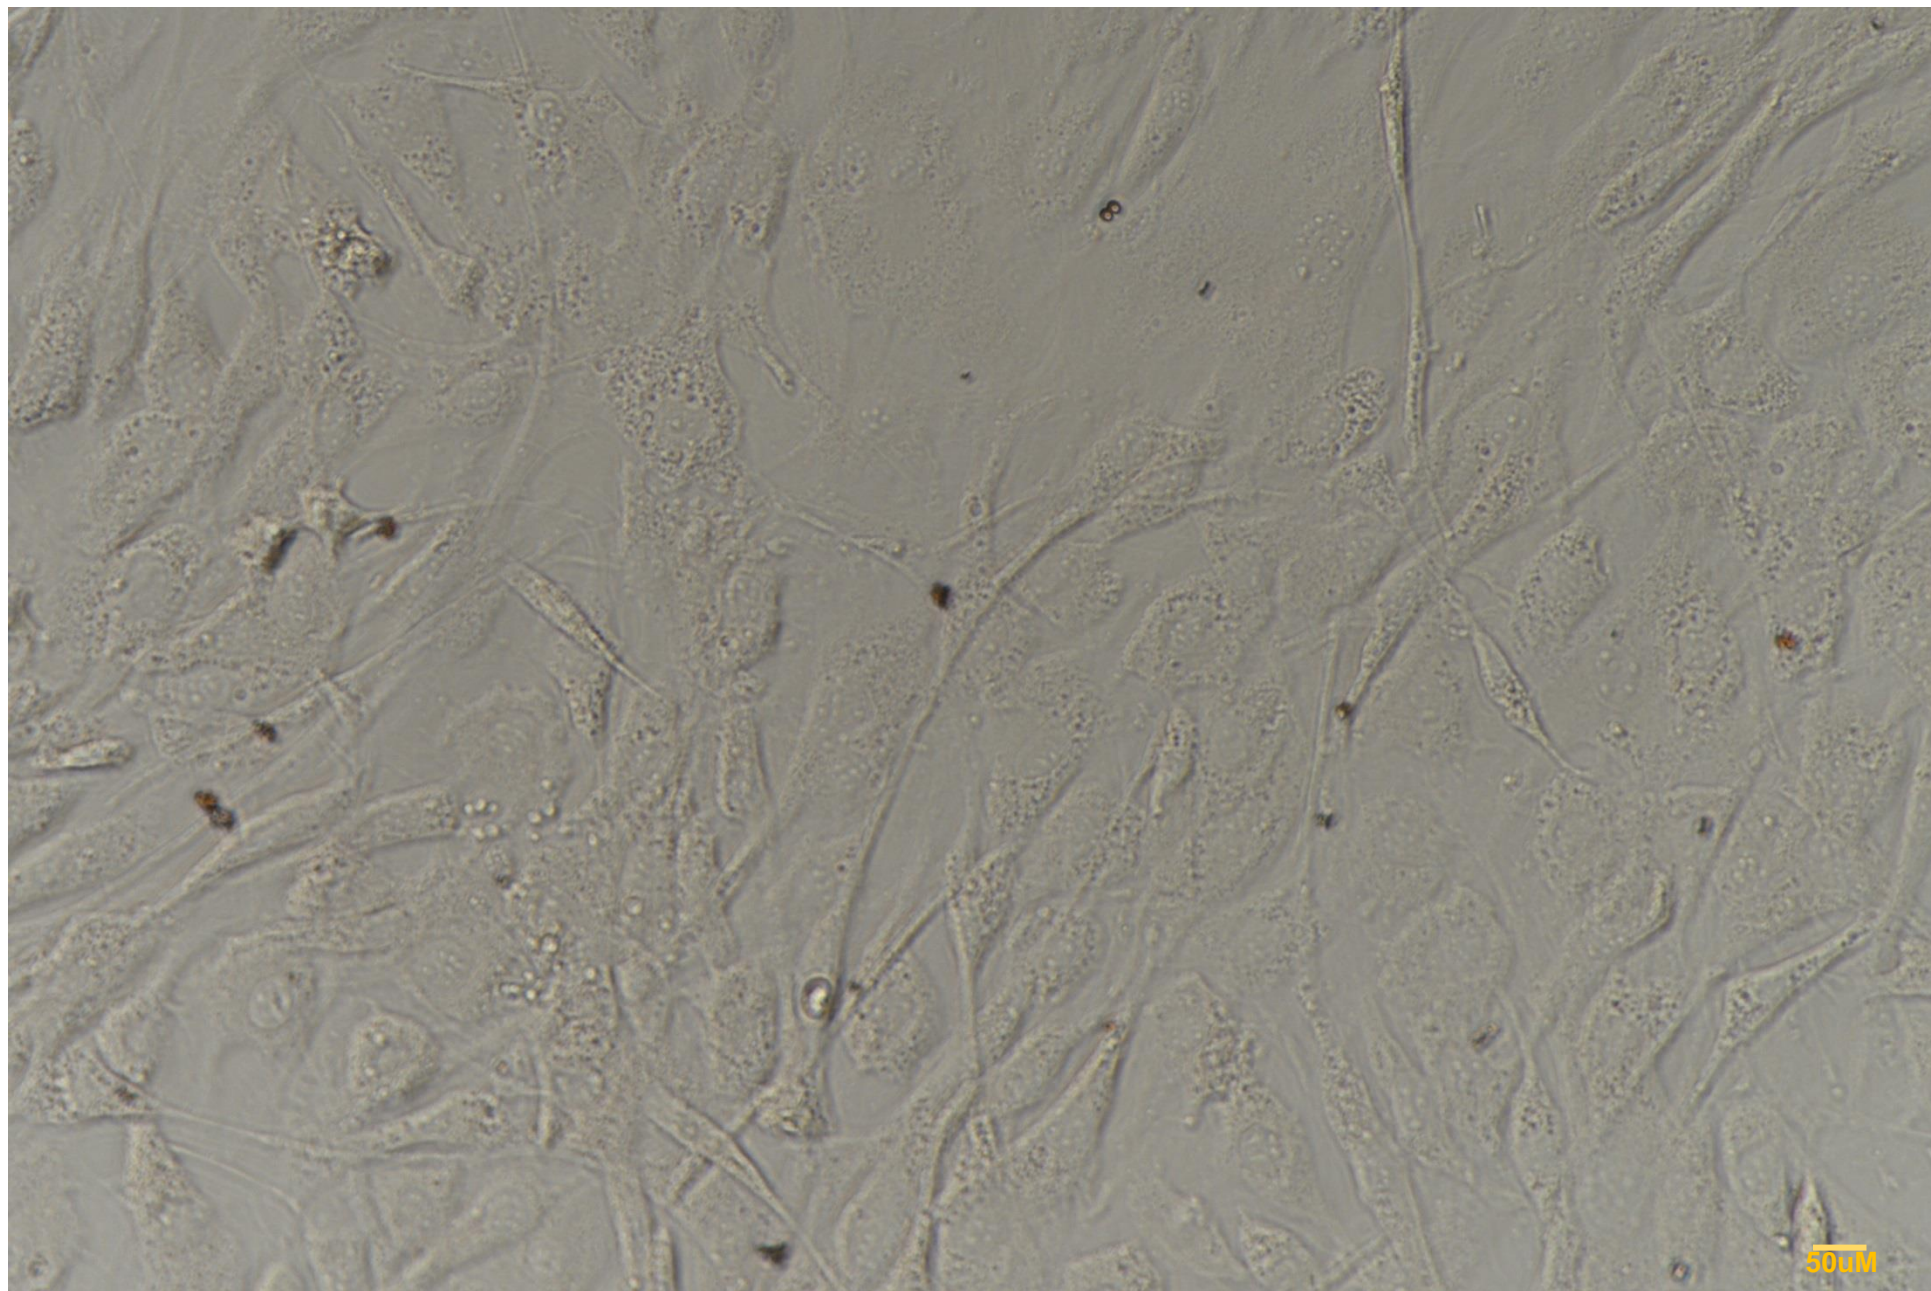

D-8 AM (LG)

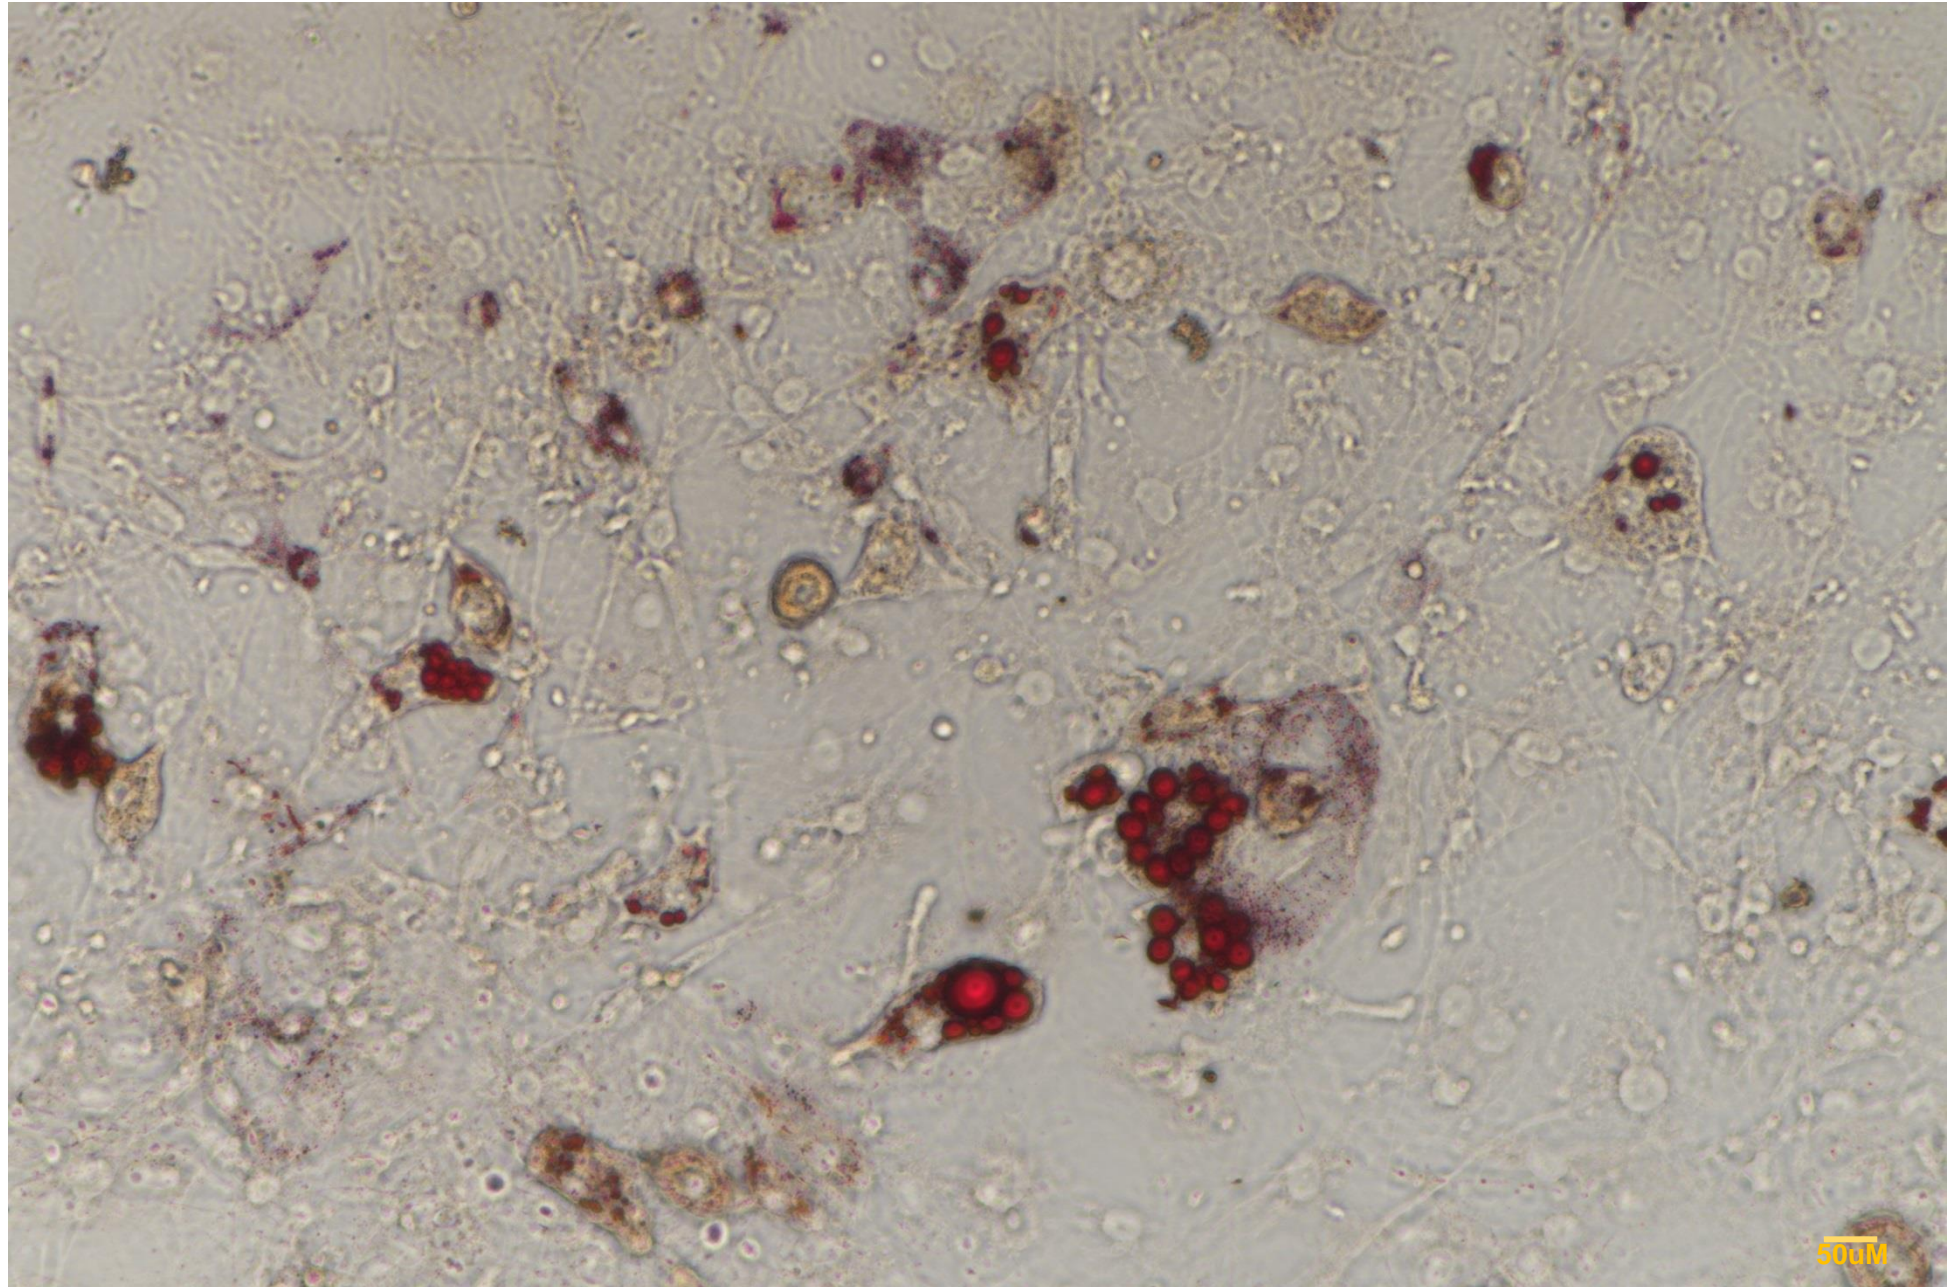

**D-0 AM (HG, HGlut)**

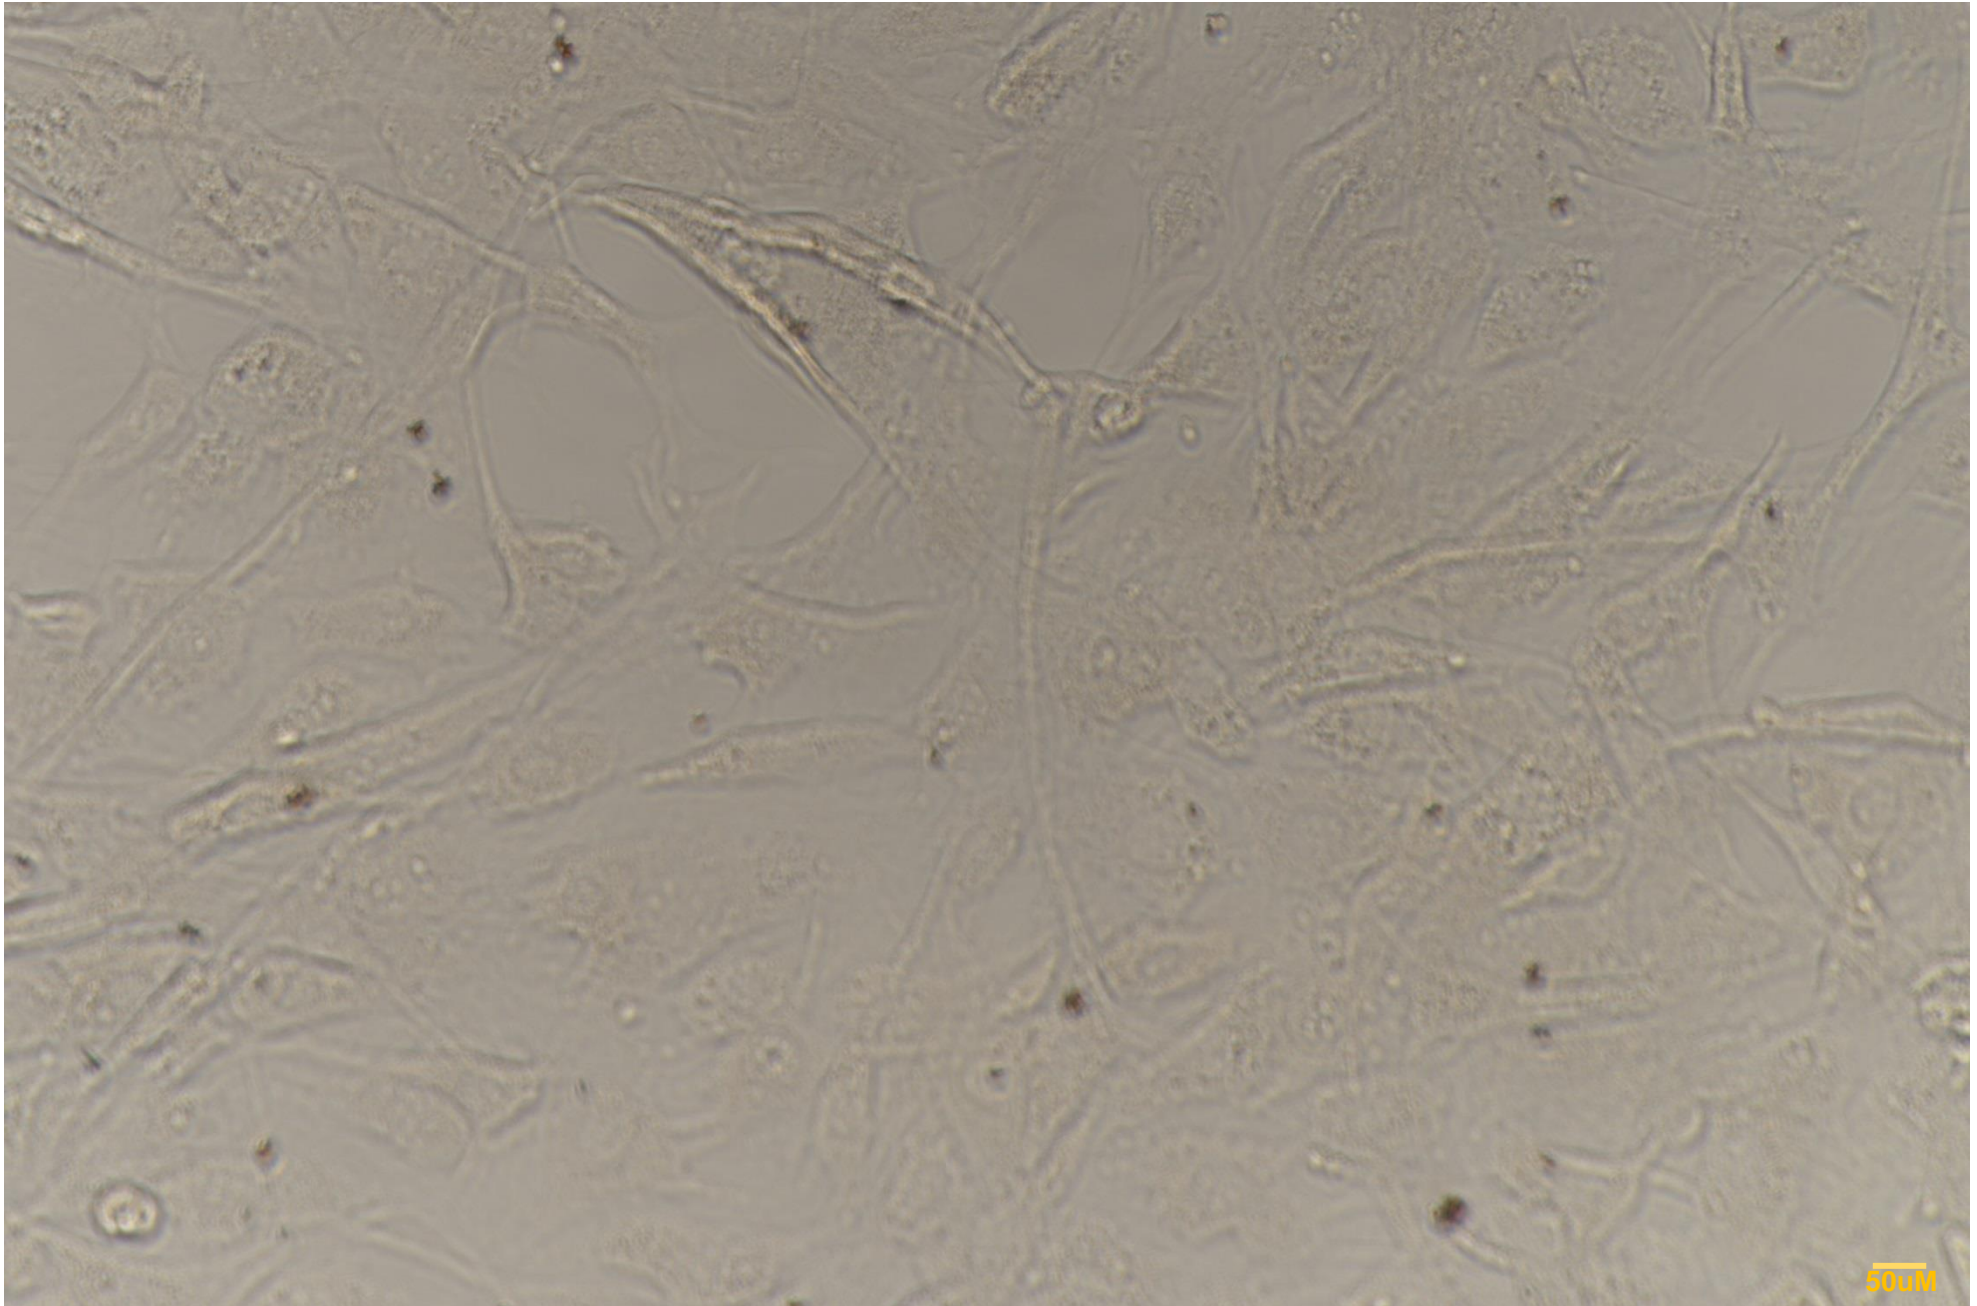

**D-8 AM (HG, HGlut)**

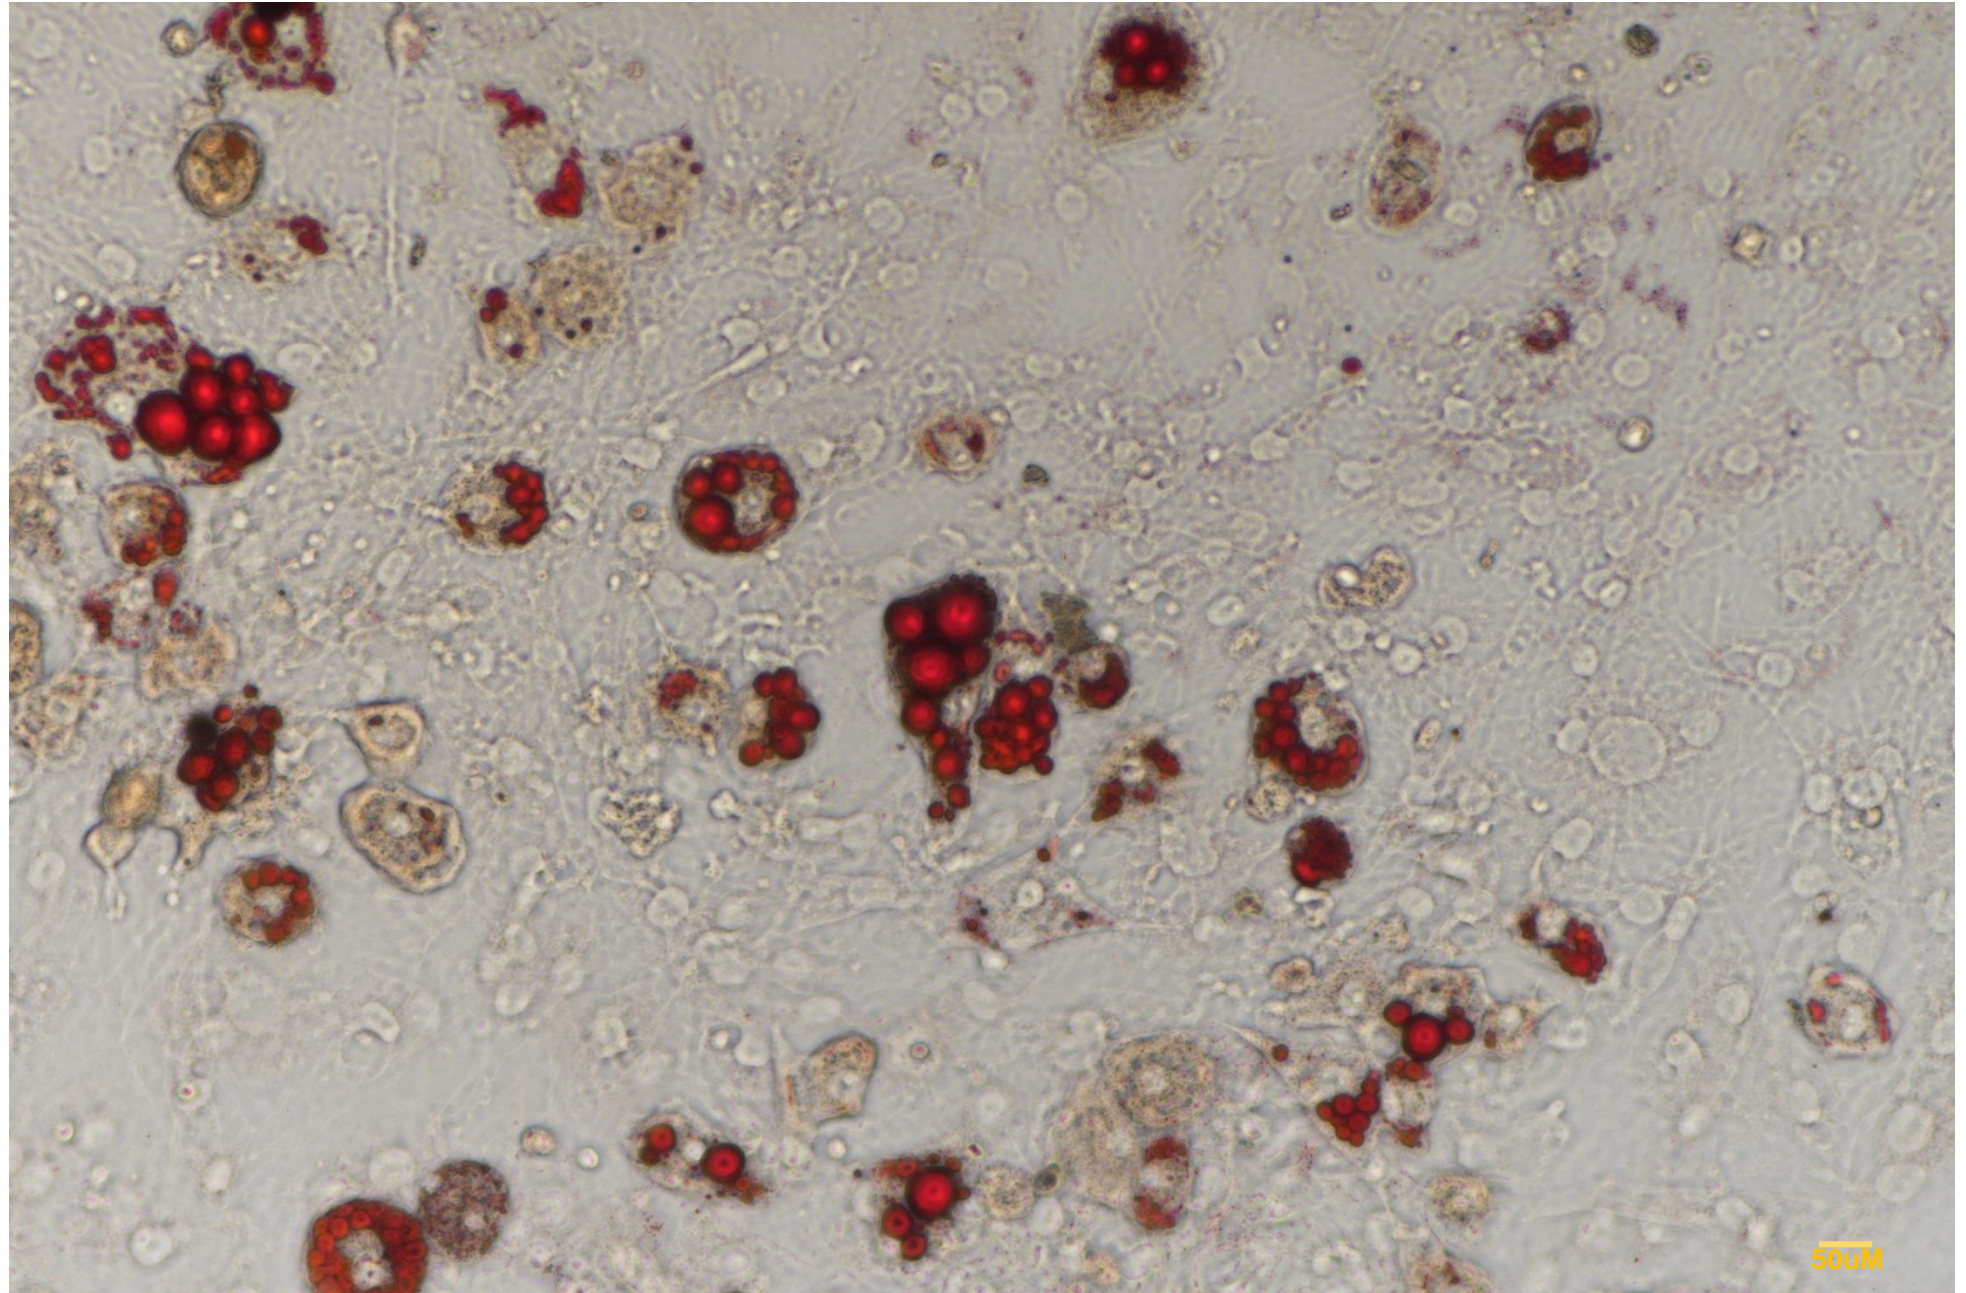

Supplement: 41420_2022_1077_MOESM3_ESM.pdf [file 41420_2022_1077_MOESM3_ESM.pdf]
